# Supplementary material for: The Introduction of Detergents in Thermal Proteome Profiling Requires Lowering the Applied Temperatures for Efficient Target Protein Identification
Source: Molecules. 2023 Jun 20;28(12):4859. doi: 10.3390/molecules28124859 (PMC10301966; doi:10.3390/molecules28124859)
Supplement: Supplementary file 1 [file molecules-28-04859-s001.zip › Supplementary_Table_S1-S3.xlsx]

## Sheet: Table_S1
Table S1. Summary of the identified kinase targets in each experiment.
Experiment	Log2FC	Log10P.Value	Genes	Name	PG.UID	is.kinase	is.membrane
PBS TPP at 52℃	0.771444	7.58346	CDK5	Cyclin-dependent-like kinase 5	Q00535	yes	no
	0.831237	7.24887	BMP2K	BMP-2-inducible protein kinase	Q9NSY1	yes	no
	0.721352	6.54972	GRK2	Beta-adrenergic receptor kinase 1	P25098	yes	no
	0.826726	6.51929	PHKG2	Phosphorylase b kinase gamma catalytic chain, liver/testis isoform	P15735	yes	no
	0.680941	6.35571	CSK	Tyrosine-protein kinase CSK	P41240	yes	no
	1.47154	6.31335	PAK4	Serine/threonine-protein kinase PAK 4	O96013	yes	no
	0.787432	6.30966	MAP2K2	Dual specificity mitogen-activated protein kinase kinase 2	P36507	yes	no
	1.59271	5.71455	CAMKK2	Calcium/calmodulin-dependent protein kinase kinase 2	Q96RR4	yes	no
	0.414796	5.68446	CSNK2A2	Casein kinase II subunit alpha'	P19784	yes	no
	0.373831	5.66208	CDK2	Cyclin-dependent kinase 2	P24941	yes	no
	0.991197	5.5319	GSK3A	Glycogen synthase kinase-3 alpha	P49840	yes	no
	0.422423	5.38672	ADK	Adenosine kinase	P55263	yes	no
	0.788582	5.23041	AURKA	Aurora kinase A	O14965	yes	no
	0.72434	5.10992	MAP2K7	Dual specificity mitogen-activated protein kinase kinase 7	O14733	yes	no
	0.587014	5.07313	STK38	Serine/threonine-protein kinase 38	Q15208	yes	no
	0.64726	4.89688	MAP2K1	Dual specificity mitogen-activated protein kinase kinase 1	Q02750	yes	no
	0.474047	4.73402	PRKACA	cAMP-dependent protein kinase catalytic subunit alpha	P17612	yes	no
	0.541341	4.6597	IRAK4	Interleukin-1 receptor-associated kinase 4	Q9NWZ3	yes	no
	0.478981	4.65517	CHEK1	Serine/threonine-protein kinase Chk1	O14757	yes	no
	0.534379	4.61308	TLK1	Serine/threonine-protein kinase tousled-like 1	Q9UKI8	yes	no
	1.12837	4.5407	STK25	Serine/threonine-protein kinase 25	O00506	yes	no
	0.530323	4.41168	STK3	Serine/threonine-protein kinase 3	Q13188	yes	no
	0.446002	4.21471	STK24	Serine/threonine-protein kinase 24	Q9Y6E0	yes	no
	0.955162	4.08173	GSK3B	Glycogen synthase kinase-3 beta	P49841	yes	no
	0.283891	4.05357	SRPK1	SRSF protein kinase 1	Q96SB4	yes	no
	0.248914	3.95942	ROCK2	Rho-associated protein kinase 2	O75116	yes	no
	0.325942	3.94068	MAPK8	Mitogen-activated protein kinase 8	P45983	yes	no
	0.548639	3.86185	MASTL	Serine/threonine-protein kinase greatwall	Q96GX5	yes	no
	0.498892	3.70188	PDPK1	3-phosphoinositide-dependent protein kinase 1	O15530	yes	no
	0.446334	3.6316	TLK2	Serine/threonine-protein kinase tousled-like 2	Q86UE8	yes	no
	1.71409	3.506	CAMKK1	Calcium/calmodulin-dependent protein kinase kinase 1	Q8N5S9	yes	no
	0.41436	3.33363	CHEK2	Serine/threonine-protein kinase Chk2	O96017	yes	no
	0.28443	3.0882	GAK	Cyclin-G-associated kinase	O14976	yes	no
	1.05587	3.07104	AAK1	AP2-associated protein kinase 1	Q2M2I8	yes	no
	0.290902	3.0437	CDK9	Cyclin-dependent kinase 9	P50750	yes	no
	0.419872	2.90772	TNIK	TRAF2 and NCK-interacting protein kinase	Q9UKE5	yes	no
	0.251821	2.69961	MAP2K4	Dual specificity mitogen-activated protein kinase kinase 4	P45985	yes	no
	0.520918	2.65323	STK38L	Serine/threonine-protein kinase 38-like	Q9Y2H1	yes	no
	0.22319	2.63777	PRPF4B	Serine/threonine-protein kinase PRP4 homolog	Q13523	yes	no
	0.273639	2.62801	RPS6KA3	Ribosomal protein S6 kinase alpha-3	P51812	yes	no
	0.367828	2.52008	CDK4	Cyclin-dependent kinase 4	P11802	yes	no
	0.169957	2.50807	CSNK2B	Casein kinase II subunit beta	P67870	yes	no
	0.363756	2.50091	PASK	PAS domain-containing serine/threonine-protein kinase	Q96RG2	yes	no
	1.68277	2.47144	STK17B	Serine/threonine-protein kinase 17B	O94768	yes	no
	0.264595	2.45468	CDK12	Cyclin-dependent kinase 12	Q9NYV4	yes	no
	0.652531	2.10206	RPS6KC1	Ribosomal protein S6 kinase delta-1	Q96S38	yes	no
	0.172367	2.01791	PTK2	Focal adhesion kinase 1	Q05397	yes	no
NP40 TPP at 52 ℃	0.956428	6.17983	PRKACA	cAMP-dependent protein kinase catalytic subunit alpha	P17612	yes	no
	0.884128	6.14485	BMP2K	BMP-2-inducible protein kinase	Q9NSY1	yes	no
	1.49032	5.97498	PHKG2	Phosphorylase b kinase gamma catalytic chain, liver/testis isoform	P15735	yes	no
	0.903013	5.83978	STK4	Serine/threonine-protein kinase 4	Q13043	yes	no
	0.820495	5.30638	CHEK1	Serine/threonine-protein kinase Chk1	O14757	yes	no
	1.00775	5.04465	PAK4	Serine/threonine-protein kinase PAK 4	O96013	yes	no
	0.836855	4.23659	PDPK1	3-phosphoinositide-dependent protein kinase 1	O15530	yes	no
	0.640636	4.06951	PRKACG	cAMP-dependent protein kinase catalytic subunit gamma	P22612	yes	no
	0.5458	3.75099	TNIK	TRAF2 and NCK-interacting protein kinase	Q9UKE5	yes	no
	0.612771	3.73565	TLK2	Serine/threonine-protein kinase tousled-like 2	Q86UE8	yes	no
	0.398677	3.71456	PRKAA1	5'-AMP-activated protein kinase catalytic subunit alpha-1	Q13131	yes	no
	0.616098	3.63531	DYRK1A	Dual specificity tyrosine-phosphorylation-regulated kinase 1A	Q13627	yes	no
	0.719024	3.55106	AURKA	Aurora kinase A	O14965	yes	no
	1.10755	3.45339	CAMK2G	Calcium/calmodulin-dependent protein kinase type II subunit gamma	Q13555	yes	no
	0.319646	3.23437	CDK2	Cyclin-dependent kinase 2	P24941	yes	no
	0.6081	2.99865	RPS6KC1	Ribosomal protein S6 kinase delta-1	Q96S38	yes	no
	0.4427	2.90275	MARK3	MAP/microtubule affinity-regulating kinase 3	P27448	yes	no
	0.334534	2.66469	STK3	Serine/threonine-protein kinase 3	Q13188	yes	no
	1.39737	2.54961	AAK1	AP2-associated protein kinase 1	Q2M2I8	yes	no
	0.530216	2.24871	PASK	PAS domain-containing serine/threonine-protein kinase	Q96RG2	yes	no
	0.550285	2.2261	GSK3B	Glycogen synthase kinase-3 beta	P49841	yes	no
CHAPS TPP at 52 ℃	3.49851	8.58612	PAK4	Serine/threonine-protein kinase PAK 4	O96013	yes	no
	2.17255	8.43117	PHKG2	Phosphorylase b kinase gamma catalytic chain, liver/testis isoform	P15735	yes	no
	1.48835	7.28231	PDPK1	3-phosphoinositide-dependent protein kinase 1	O15530	yes	no
	0.819349	6.81775	BMP2K	BMP-2-inducible protein kinase	Q9NSY1	yes	no
	2.46973	6.79743	AAK1	AP2-associated protein kinase 1	Q2M2I8	yes	no
	1.63604	6.09502	CHEK1	Serine/threonine-protein kinase Chk1	O14757	yes	no
	2.30644	5.80611	AURKA	Aurora kinase A	O14965	yes	no
	0.499277	5.7746	CDK2	Cyclin-dependent kinase 2	P24941	yes	no
	1.26335	5.40171	CDK8;CDK19	Cyclin-dependent kinase 8;Cyclin-dependent kinase 19	P49336;Q9BWU1	yes	no
	1.69989	5.4002	SIK3	Serine/threonine-protein kinase SIK3	Q9Y2K2	yes	no
	0.716623	5.1325	PRKACA	cAMP-dependent protein kinase catalytic subunit alpha	P17612	yes	no
	0.769804	4.81917	GSK3B	Glycogen synthase kinase-3 beta	P49841	yes	no
	0.705428	4.77883	STK3	Serine/threonine-protein kinase 3	Q13188	yes	no
	0.516227	4.42479	GSK3A	Glycogen synthase kinase-3 alpha	P49840	yes	no
	0.542907	4.38348	TAOK3	Serine/threonine-protein kinase TAO3	Q9H2K8	yes	no
	0.977369	4.135	TAOK1	Serine/threonine-protein kinase TAO1	Q7L7X3	yes	no
	0.300185	4.12992	STK24	Serine/threonine-protein kinase 24	Q9Y6E0	yes	no
	0.417377	3.90112	PRKAA1	5'-AMP-activated protein kinase catalytic subunit alpha-1	Q13131	yes	no
	1.17417	3.90109	TLK2	Serine/threonine-protein kinase tousled-like 2	Q86UE8	yes	no
	0.475231	3.86295	PTK2	Focal adhesion kinase 1	Q05397	yes	no
	0.460598	3.74692	CHEK2	Serine/threonine-protein kinase Chk2	O96017	yes	no
	0.422999	3.35294	SLK	STE20-like serine/threonine-protein kinase	Q9H2G2	yes	no
	0.346653	3.08679	PRKAG1	5'-AMP-activated protein kinase subunit gamma-1	P54619	yes	no
	0.649749	2.92199	TLK1	Serine/threonine-protein kinase tousled-like 1	Q9UKI8	yes	no
	0.395676	2.72883	PRKAB1	5'-AMP-activated protein kinase subunit beta-1	Q9Y478	yes	no
	0.302528	2.24546	CDK5	Cyclin-dependent-like kinase 5	Q00535	yes	no
	1.18623	2.12963	STK10	Serine/threonine-protein kinase 10	O94804	yes	no
	0.822498	2.02421	PRKAB2	5'-AMP-activated protein kinase subunit beta-2	O43741	yes	no
PBS TPP at 49℃	0.448863	5.20289	CDK5	Cyclin-dependent-like kinase 5	Q00535	yes	no
	0.439178	4.46705	PAK4	Serine/threonine-protein kinase PAK 4	O96013	yes	no
	0.32175	3.93293	GRK2	Beta-adrenergic receptor kinase 1	P25098	yes	no
	0.30255	3.5621	IRAK4	Interleukin-1 receptor-associated kinase 4	Q9NWZ3	yes	no
	0.177856	3.47318	CSNK2A2	Casein kinase II subunit alpha'	P19784	yes	no
	0.219439	3.24133	PDPK1	3-phosphoinositide-dependent protein kinase 1	O15530	yes	no
	0.267277	3.22178	MAP2K2	Dual specificity mitogen-activated protein kinase kinase 2	P36507	yes	no
	0.2019	3.14685	RPS6KA1	Ribosomal protein S6 kinase alpha-1	Q15418	yes	no
	0.2811	3.08302	PHKG2	Phosphorylase b kinase gamma catalytic chain, liver/testis isoform	P15735	yes	no
	0.182161	2.99702	CSK	Tyrosine-protein kinase CSK	P41240	yes	no
	0.199662	2.97444	MAPK8	Mitogen-activated protein kinase 8	P45983	yes	no
	0.316074	2.81928	GSK3A	Glycogen synthase kinase-3 alpha	P49840	yes	no
	0.324895	2.72324	MAP2K7	Dual specificity mitogen-activated protein kinase kinase 7	O14733	yes	no
	0.298518	2.70026	STK38L	Serine/threonine-protein kinase 38-like	Q9Y2H1	yes	no
	0.31	2.69205	BMP2K	BMP-2-inducible protein kinase	Q9NSY1	yes	no
	0.226002	2.63964	STK38	Serine/threonine-protein kinase 38	Q15208	yes	no
	0.525152	2.61214	AAK1	AP2-associated protein kinase 1	Q2M2I8	yes	no
	0.280657	2.55561	MAP2K4	Dual specificity mitogen-activated protein kinase kinase 4	P45985	yes	no
	0.605102	2.46901	STK25	Serine/threonine-protein kinase 25	O00506	yes	no
	0.137748	2.45893	STK26	Serine/threonine-protein kinase 26	Q9P289	yes	no
	0.439346	2.45412	IRAK1	Interleukin-1 receptor-associated kinase 1	P51617	yes	no
	0.337201	2.27771	FER	Tyrosine-protein kinase Fer	P16591	yes	no
	0.388733	2.26038	CAMKK2	Calcium/calmodulin-dependent protein kinase kinase 2	Q96RR4	yes	no
	0.180721	2.17672	CDK9	Cyclin-dependent kinase 9	P50750	yes	no
	0.169932	2.07921	STK4	Serine/threonine-protein kinase 4	Q13043	yes	no
NP40 TPP at 49℃	0.884078	7.7775	BMP2K	BMP-2-inducible protein kinase	Q9NSY1	yes	no
	1.03069	7.08896	PHKG2	Phosphorylase b kinase gamma catalytic chain, liver/testis isoform	P15735	yes	no
	0.926404	6.94991	PDPK1	3-phosphoinositide-dependent protein kinase 1	O15530	yes	no
	1.91773	6.78494	PAK4	Serine/threonine-protein kinase PAK 4	O96013	yes	no
	0.745301	6.67039	PRKACA	cAMP-dependent protein kinase catalytic subunit alpha	P17612	yes	no
	0.457115	6.49552	CHEK1	Serine/threonine-protein kinase Chk1	O14757	yes	no
	0.651767	5.67245	AURKA	Aurora kinase A	O14965	yes	no
	0.546561	5.61929	GSK3A	Glycogen synthase kinase-3 alpha	P49840	yes	no
	0.770242	5.14055	TLK1	Serine/threonine-protein kinase tousled-like 1	Q9UKI8	yes	no
	0.46581	4.98907	TNIK	TRAF2 and NCK-interacting protein kinase	Q9UKE5	yes	no
	0.597621	4.98857	TLK2	Serine/threonine-protein kinase tousled-like 2	Q86UE8	yes	no
	0.349059	4.87822	CDK5	Cyclin-dependent-like kinase 5	Q00535	yes	no
	0.426549	4.71965	CSK	Tyrosine-protein kinase CSK	P41240	yes	no
	0.407013	4.62902	CDK2	Cyclin-dependent kinase 2	P24941	yes	no
	0.577085	4.5099	STK4	Serine/threonine-protein kinase 4	Q13043	yes	no
	0.414945	4.10403	MAP2K1	Dual specificity mitogen-activated protein kinase kinase 1	Q02750	yes	no
	0.964562	4.09835	CAMK2G	Calcium/calmodulin-dependent protein kinase type II subunit gamma	Q13555	yes	no
	0.532137	3.82179	PHKA2	Phosphorylase b kinase regulatory subunit alpha, liver isoform	P46019	yes	no
	0.434262	3.69182	MARK3	MAP/microtubule affinity-regulating kinase 3	P27448	yes	no
	0.366601	3.54097	GRK2	Beta-adrenergic receptor kinase 1	P25098	yes	no
	0.972951	3.44593	CAMKK2	Calcium/calmodulin-dependent protein kinase kinase 2	Q96RR4	yes	no
	0.664498	3.42222	MARK2	Serine/threonine-protein kinase MARK2	Q7KZI7	yes	no
	0.316325	3.41832	CDK9	Cyclin-dependent kinase 9	P50750	yes	no
	0.173044	3.29636	ROCK2	Rho-associated protein kinase 2	O75116	yes	no
	0.34961	3.26812	PRKAA1	5'-AMP-activated protein kinase catalytic subunit alpha-1	Q13131	yes	no
	0.285395	3.13726	SRPK1	SRSF protein kinase 1	Q96SB4	yes	no
	0.539264	3.10576	STK38L	Serine/threonine-protein kinase 38-like	Q9Y2H1	yes	no
	0.624786	2.97353	AURKB	Aurora kinase B	Q96GD4	yes	no
	0.368326	2.9628	STK38	Serine/threonine-protein kinase 38	Q15208	yes	no
	0.402458	2.93027	CIT	Citron Rho-interacting kinase	O14578	yes	no
	1.37783	2.87757	STK10	Serine/threonine-protein kinase 10	O94804	yes	no
	0.767142	2.74493	GSK3B	Glycogen synthase kinase-3 beta	P49841	yes	no
	0.188995	2.68727	PRKAB1	5'-AMP-activated protein kinase subunit beta-1	Q9Y478	yes	no
	0.228859	2.63331	STK24	Serine/threonine-protein kinase 24	Q9Y6E0	yes	no
	0.21951	2.3948	STK3	Serine/threonine-protein kinase 3	Q13188	yes	no
	0.295755	2.28087	IRAK4	Interleukin-1 receptor-associated kinase 4	Q9NWZ3	yes	no
	0.22408	2.19616	CHEK2	Serine/threonine-protein kinase Chk2	O96017	yes	no
	0.517491	2.18222	CSNK1D	Casein kinase I isoform delta	P48730	yes	no
	0.466011	2.15523	MAP4K5	Mitogen-activated protein kinase kinase kinase kinase 5	Q9Y4K4	yes	no
	0.595609	2.15026	SIK3	Serine/threonine-protein kinase SIK3	Q9Y2K2	yes	no
	0.236653	2.148	MAP2K2	Dual specificity mitogen-activated protein kinase kinase 2	P36507	yes	no
	1.06719	2.02513	AAK1	AP2-associated protein kinase 1	Q2M2I8	yes	no
CHAPS TPP at 49℃	2.08773	8.53026	PAK4	Serine/threonine-protein kinase PAK 4	O96013	yes	no
	1.18202	8.46391	PRKACB	cAMP-dependent protein kinase catalytic subunit beta	P22694	yes	no
	1.24295	8.21018	GSK3A	Glycogen synthase kinase-3 alpha	P49840	yes	no
	1.23516	8.03867	TAOK3	Serine/threonine-protein kinase TAO3	Q9H2K8	yes	no
	1.31444	7.69551	PHKG2	Phosphorylase b kinase gamma catalytic chain, liver/testis isoform	P15735	yes	no
	0.983651	7.4829	TAOK1	Serine/threonine-protein kinase TAO1	Q7L7X3	yes	no
	0.750418	7.4825	SLK	STE20-like serine/threonine-protein kinase	Q9H2G2	yes	no
	0.837589	7.47806	PTK2	Focal adhesion kinase 1	Q05397	yes	no
	1.20402	7.22224	STK4	Serine/threonine-protein kinase 4	Q13043	yes	no
	1.38889	7.10325	PDPK1	3-phosphoinositide-dependent protein kinase 1	O15530	yes	no
	1.86733	6.98142	CDK8;CDK19	Cyclin-dependent kinase 8;Cyclin-dependent kinase 19	P49336;Q9BWU1	yes	no
	0.628333	6.87105	PRKAA1	5'-AMP-activated protein kinase catalytic subunit alpha-1	Q13131	yes	no
	1.3129	6.72734	PRKACA	cAMP-dependent protein kinase catalytic subunit alpha	P17612	yes	no
	1.75128	6.49483	GSK3B	Glycogen synthase kinase-3 beta	P49841	yes	no
	1.28453	6.3185	AURKA	Aurora kinase A	O14965	yes	no
	0.507414	6.15667	CDK2	Cyclin-dependent kinase 2	P24941	yes	no
	2.01163	6.0974	AAK1	AP2-associated protein kinase 1	Q2M2I8	yes	no
	0.745859	5.86831	CHEK2	Serine/threonine-protein kinase Chk2	O96017	yes	no
	1.17328	5.85163	TLK2	Serine/threonine-protein kinase tousled-like 2	Q86UE8	yes	no
	0.589197	5.26538	CHEK1	Serine/threonine-protein kinase Chk1	O14757	yes	no
	0.448282	4.88402	PRKAG1	5'-AMP-activated protein kinase subunit gamma-1	P54619	yes	no
	0.719637	4.82326	STK3	Serine/threonine-protein kinase 3	Q13188	yes	no
	0.446012	4.74379	PRKAB1	5'-AMP-activated protein kinase subunit beta-1	Q9Y478	yes	no
	1.47479	4.63264	AURKB	Aurora kinase B	Q96GD4	yes	no
	0.687907	4.54184	TLK1	Serine/threonine-protein kinase tousled-like 1	Q9UKI8	yes	no
	0.400844	4.51036	MAP2K1	Dual specificity mitogen-activated protein kinase kinase 1	Q02750	yes	no
	1.20295	4.45252	STK10	Serine/threonine-protein kinase 10	O94804	yes	no
	0.723531	4.28862	BMP2K	BMP-2-inducible protein kinase	Q9NSY1	yes	no
	0.671413	4.04342	CDK12	Cyclin-dependent kinase 12	Q9NYV4	yes	no
	0.858358	4.01095	MARK3	MAP/microtubule affinity-regulating kinase 3	P27448	yes	no
	0.543271	3.95681	TNIK	TRAF2 and NCK-interacting protein kinase	Q9UKE5	yes	no
	0.316317	3.29037	MAPK8	Mitogen-activated protein kinase 8	P45983	yes	no
	0.640102	2.98954	CAMKK2	Calcium/calmodulin-dependent protein kinase kinase 2	Q96RR4	yes	no
	0.886102	2.89474	SIK3	Serine/threonine-protein kinase SIK3	Q9Y2K2	yes	no
	0.79636	2.62098	CDK13	Cyclin-dependent kinase 13	Q14004	yes	no
	0.374007	2.5542	PRKCI	Protein kinase C iota type	P41743	yes	no
	0.488115	2.3892	STK38	Serine/threonine-protein kinase 38	Q15208	yes	no
	0.227003	2.36184	STK24	Serine/threonine-protein kinase 24	Q9Y6E0	yes	no
	0.211342	2.33434	MAPK9	Mitogen-activated protein kinase 9	P45984	yes	no
	0.2957	2.25797	MVK	Mevalonate kinase	Q03426	yes	no
	0.424696	2.24144	MAP3K4	Mitogen-activated protein kinase kinase kinase 4	Q9Y6R4	yes	no
CHAPS TPP at 47℃	0.947378	8.1528	PHKG2	Phosphorylase b kinase gamma catalytic chain, liver/testis isoform	P15735	yes	no
	1.13848	7.95801	GSK3A	Glycogen synthase kinase-3 alpha	P49840	yes	no
	0.748507	7.5251	PTK2	Focal adhesion kinase 1	Q05397	yes	no
	0.903155	7.04013	PDPK1	3-phosphoinositide-dependent protein kinase 1	O15530	yes	no
	0.769108	6.78801	PRKACA	cAMP-dependent protein kinase catalytic subunit alpha	P17612	yes	no
	2.12718	6.78446	PAK4	Serine/threonine-protein kinase PAK 4	O96013	yes	no
	0.439911	6.52612	PRKAA1	5'-AMP-activated protein kinase catalytic subunit alpha-1	Q13131	yes	no
	0.622183	6.18015	TAOK1	Serine/threonine-protein kinase TAO1	Q7L7X3	yes	no
	0.673336	6.12266	TLK2	Serine/threonine-protein kinase tousled-like 2	Q86UE8	yes	no
	0.834852	5.94483	TLK1	Serine/threonine-protein kinase tousled-like 1	Q9UKI8	yes	no
	0.696265	5.82622	STK4	Serine/threonine-protein kinase 4	Q13043	yes	no
	1.17742	5.63071	AURKA	Aurora kinase A	O14965	yes	no
	0.775066	5.53002	PRKACG	cAMP-dependent protein kinase catalytic subunit gamma	P22612	yes	no
	0.698979	5.4603	TAOK3	Serine/threonine-protein kinase TAO3	Q9H2K8	yes	no
	0.342002	5.04814	CDK2	Cyclin-dependent kinase 2	P24941	yes	no
	0.373729	4.83296	SLK	STE20-like serine/threonine-protein kinase	Q9H2G2	yes	no
	0.447081	4.80838	CDK5	Cyclin-dependent-like kinase 5	Q00535	yes	no
	0.752243	4.72629	AAK1	AP2-associated protein kinase 1	Q2M2I8	yes	no
	0.714134	4.69364	TNIK	TRAF2 and NCK-interacting protein kinase	Q9UKE5	yes	no
	0.583316	4.5071	STK38	Serine/threonine-protein kinase 38	Q15208	yes	no
	0.406217	4.50703	CSK	Tyrosine-protein kinase CSK	P41240	yes	no
	0.328289	4.28007	MAP2K1	Dual specificity mitogen-activated protein kinase kinase 1	Q02750	yes	no
	0.529106	4.2536	CDK9	Cyclin-dependent kinase 9	P50750	yes	no
	0.516164	4.21484	SRPK1	SRSF protein kinase 1	Q96SB4	yes	no
	0.595153	4.10792	BMP2K	BMP-2-inducible protein kinase	Q9NSY1	yes	no
	0.514824	4.09046	CDK12	Cyclin-dependent kinase 12	Q9NYV4	yes	no
	1.55689	4.06059	GSK3B	Glycogen synthase kinase-3 beta	P49841	yes	no
	0.409931	3.8487	PRKAB1	5'-AMP-activated protein kinase subunit beta-1	Q9Y478	yes	no
	0.336516	3.692	STK24	Serine/threonine-protein kinase 24	Q9Y6E0	yes	no
	0.322514	3.59775	CHEK1	Serine/threonine-protein kinase Chk1	O14757	yes	no
	0.398901	3.54764	CHEK2	Serine/threonine-protein kinase Chk2	O96017	yes	no
	0.697965	3.35206	CDK8;CDK19	Cyclin-dependent kinase 8;Cyclin-dependent kinase 19	P49336;Q9BWU1	yes	no
	0.711344	3.32165	STK10	Serine/threonine-protein kinase 10	O94804	yes	no
	0.230475	3.30771	PRKAG1	5'-AMP-activated protein kinase subunit gamma-1	P54619	yes	no
	2.05968	3.25134	CAMKK1	Calcium/calmodulin-dependent protein kinase kinase 1	Q8N5S9	yes	no
	0.259341	3.15205	GRK2	Beta-adrenergic receptor kinase 1	P25098	yes	no
	0.981037	2.93031	AURKB	Aurora kinase B	Q96GD4	yes	no
	0.287627	2.78984	MAPK9	Mitogen-activated protein kinase 9	P45984	yes	no
	0.261381	2.756	IRAK4	Interleukin-1 receptor-associated kinase 4	Q9NWZ3	yes	no
	0.588178	2.73213	PRKAB2	5'-AMP-activated protein kinase subunit beta-2	O43741	yes	no
	0.538937	2.53408	PRKCD	Protein kinase C delta type	Q05655	yes	no

## Sheet: Table_S2
Table S2. The proportion of membrane proteins among the kinase proteins
HGNC.Name	Kinase.Name	Group	Family	SubFamily	UniprotID	is.membrane	is.glycan	is.uniprot_membrane
AAK1	AP2-associated protein kinase 1	Other	NAK		Q2M2I8	no	no	no
ABL1	Tyrosine-protein kinase ABL1	TK	Abl		P00519	no	no	no
ABL2	Abelson tyrosine-protein kinase 2	TK	Abl		P42684	no	no	no
ABR	Active breakpoint cluster region-related protein	Atypical	BCR		Q12979	no	no	no
TNK2	Activated CDC42 kinase 1	TK	Ack		Q07912	no	no	no
ACVR2A	Activin receptor type-2A	TKL	STKR	STKR2	P27037	yes	yes	yes
ACVR2B	Activin receptor type-2B	TKL	STKR	STKR2	Q13705	yes	yes	yes
ADCK1	Uncharacterized aarF domain-containing protein kinase 1	Atypical	ABC1	ABC1-B	Q86TW2	no	no	no
ADCK2	Uncharacterized aarF domain-containing protein kinase 2	Atypical	ABC1	ABC1-C	Q7Z695	no	no	yes
ADCK3	Chaperone activity of bc1 complex-like	Atypical	ABC1	ABC1-A	Q8NI60	no	no	yes
ADCK4	Uncharacterized aarF domain-containing protein kinase 4	Atypical	ABC1	ABC1-A	Q96D53	no	no	yes
ADCK5	Uncharacterized aarF domain-containing protein kinase 5	Atypical	ABC1	ABC1-D	Q3MIX3	no	no	yes
AKT1	RAC-alpha serine/threonine-protein kinase	AGC	Akt		P31749	no	yes	no
AKT2	RAC-beta serine/threonine-protein kinase	AGC	Akt		P31751	no	yes	no
AKT3	RAC-gamma serine/threonine-protein kinase	AGC	Akt		Q9Y243	no	yes	no
ALK	ALK tyrosine kinase receptor	TK	ALK		Q9UM73	yes	yes	yes
ACVRL1	Serine/threonine-protein kinase receptor R3	TKL	STKR	STKR1	P37023	yes	yes	yes
ACVR1	Activin receptor type-1	TKL	STKR	STKR1	Q04771	yes	yes	yes
ACVR1B	Activin receptor type-1B	TKL	STKR	STKR1	P36896	yes	yes	yes
ACVR1C	Activin receptor type-1C	TKL	STKR	STKR1	Q8NER5	yes	no	yes
PRKAA1	5'-AMP-activated protein kinase catalytic subunit alpha-1	CAMK	CAMKL	AMPK	Q13131	no	no	no
PRKAA2		CAMK	CAMKL	AMPK	P54646	no	no	no
RIPK4	Receptor-interacting serine/threonine-protein kinase 4	TKL	RIPK		P57078	no	no	no
NPR1	Atrial natriuretic peptide receptor 1	RGC	RGC		P16066	yes	yes	yes
NPR2	Atrial natriuretic peptide receptor 2	RGC	RGC		P20594	yes	yes	yes
ARAF	Serine/threonine-protein kinase A-Raf	TKL	RAF		P10398	no	no	no
ATM	Serine-protein kinase ATM	Atypical	PIKK	ATM	Q13315	no	no	no
ATR	Serine/threonine-protein kinase ATR	Atypical	PIKK	ATR	Q13535	no	no	no
AXL	Tyrosine-protein kinase receptor UFO	TK	Axl		P30530	yes	yes	yes
ALPK3	Alpha-protein kinase 3	Atypical	Alpha		Q96L96	no	no	no
ALPK2	Alpha-protein kinase 2	Atypical	Alpha		Q86TB3	no	no	no
ALPK1	Alpha-protein kinase 1	Atypical	Alpha		Q96QP1	no	no	no
AURKA	Aurora kinase A	Other	Aur		O14965	no	no	no
AURKB	Aurora kinase B	Other	Aur		Q96GD4	no	no	no
AURKC	Aurora kinase C	Other	Aur		Q9UQB9	no	no	no
ADRBK1	Beta-adrenergic receptor kinase 1	AGC	GRK	BARK	P25098	no	no	no
ADRBK2	Beta-adrenergic receptor kinase 2	AGC	GRK	BARK	P35626	no	no	no
BAZ1A	Bromodomain adjacent to zinc finger domain protein 1A	Atypical	BAZ		Q9NRL2	no	no	no
BAZ1B	Tyrosine-protein kinase BAZ1B	Atypical	BAZ		Q9UIG0	no	no	no
BCKDK	[3-methyl-2-oxobutanoate dehydrogenase [lipoamide]] kinase	Atypical	PDHK		O14874	no	no	no
BCR	Breakpoint cluster region protein	Atypical	BCR		P11274	no	no	no
BMP2K	BMP-2-inducible protein kinase	Other	NAK		Q9NSY1	no	no	no
BLK	Tyrosine-protein kinase Blk	TK	Src		P51451	no	no	no
BLVRA	Biliverdin reductase A	Atypical	BLVRA		P53004	no	no	no
BMPR1A	Bone morphogenetic protein receptor type-1A	TKL	STKR	STKR1	P36894	yes	yes	yes
BMPR1B	Bone morphogenetic protein receptor type-1B	TKL	STKR	STKR1	O00238	no	no	yes
BMPR2	Bone morphogenetic protein receptor type-2	TKL	STKR	STKR2	Q13873	yes	yes	yes
BMX	Cytoplasmic tyrosine-protein kinase BMX	TK	Tec		P51813	no	no	no
BRAF	Serine/threonine-protein kinase B-raf	TKL	RAF		P15056	no	no	no
BRD2	Bromodomain-containing protein 2	Atypical	BRD		P25440	no	no	no
BRD3	Bromodomain-containing protein 3	Atypical	BRD		Q15059	no	no	no
BRD4	BRD4 protein	Atypical	BRD		O60885	no	no	no
BRDT	Bromodomain testis-specific protein	Atypical	BRD		Q58F21	no	no	no
PTK6	Protein-tyrosine kinase 6	TK	Src		Q13882	no	no	no
BRSK1	Serine/threonine-protein kinase BRSK1	CAMK	CAMKL	BRSK	Q8TDC3	no	no	no
BRSK2	Serine/threonine-protein kinase BRSK2	CAMK	CAMKL	BRSK	Q8IWQ3	no	no	no
BTK	Tyrosine-protein kinase BTK	TK	Tec		Q06187	no	no	no
BUB1	Mitotic checkpoint serine/threonine-protein kinase BUB1	Other	BUB		O43683	no	no	no
BUB1B	Mitotic checkpoint serine/threonine-protein kinase BUB1 beta	Other	BUB		O60566	no	no	no
CASK	Peripheral plasma membrane protein CASK	CAMK	CASK		O14936	no	no	no
PTK7	Inactive tyrosine-protein kinase 7	TK	CCK4		Q13308	yes	yes	yes
CDK20	Cyclin-dependent kinase 20	CMGC	CDK		Q8IZL9	no	no	no
CDK1	Cyclin-dependent kinase 1	CMGC	CDK	CDC2	P06493	no	no	no
CDC7	Cell division cycle 7-related protein kinase	Other	CDC7		O00311	no	no	no
CDK10	Cyclin-dependent kinase 10	CMGC	CDK	CDK10	Q15131	no	no	no
CDK19	Cyclin-dependent kinase 19	CMGC	CDK	CDK8	Q9BWU1	no	no	no
CDK2	Cyclin-dependent kinase 2	CMGC	CDK	CDK2	P24941	no	no	no
CDK3	Cyclin-dependent kinase 3	CMGC	CDK	CDK2	Q00526	no	no	no
CDK4	Cyclin-dependent kinase 4	CMGC	CDK	CDK4	P11802	no	no	no
CDK5	Cyclin-dependent kinase 5	CMGC	CDK	CDK5	Q00535	no	no	no
CDK6	Cyclin-dependent kinase 6	CMGC	CDK	CDK4	Q00534	no	no	no
CDK7	Cyclin-dependent kinase 7	CMGC	CDK	CDK7	P50613	no	no	no
CDK8	Cyclin-dependent kinase 8	CMGC	CDK	CDK8	P49336	no	no	no
CDK9	Cyclin-dependent kinase 9	CMGC	CDK	CDK9	P50750	no	no	no
CDKL1	Cyclin-dependent kinase-like 1	CMGC	CDKL		Q00532	no	no	no
CDKL2	Cyclin-dependent kinase-like 2	CMGC	CDKL		Q92772	no	no	no
CDKL3	Cyclin-dependent kinase-like 3	CMGC	CDKL		Q8IVW4	no	no	no
CDKL4	Cyclin-dependent kinase-like 4	CMGC	CDKL		Q5MAI5	no	no	no
CDKL5	Cyclin-dependent kinase-like 5	CMGC	CDKL		O76039	no	no	no
CDK13	Cyclin-dependent kinase 13	CMGC	CDK	CRK7	Q14004	no	no	no
CHEK1	Serine/threonine-protein kinase Chk1	CAMK	CAMKL	CHK1	O14757	no	no	no
CHEK2	Serine/threonine-protein kinase Chk2	CAMK	RAD53		O96017	no	no	no
CSNK1A1	Casein kinase I isoform alpha	CK1	CK1		P48729	no	no	no
CSNK1A1L	Casein kinase I isoform alpha-like	CK1	CK1		Q8N752	no	no	no
CSNK1D	Casein kinase I isoform delta	CK1	CK1		P48730	no	no	no
CSNK1E	Casein kinase I isoform epsilon	CK1	CK1		P49674	no	no	no
CSNK1G1	Casein kinase I isoform gamma-1	CK1	CK1		Q9HCP0	no	no	no
CSNK1G2	Casein kinase I isoform gamma-2	CK1	CK1		P78368	no	no	no
CSNK1G3	Casein kinase I isoform gamma-3	CK1	CK1		Q9Y6M4	no	no	no
CSNK2A1	Casein kinase II subunit alpha	CMGC	CK2		P68400	no	no	no
CSNK2A2	Casein kinase II subunit alpha'	CMGC	CK2		P19784	no	no	no
STK35	Serine/threonine-protein kinase 35	Other	NKF4		Q8TDR2	no	no	no
PDIK1L	Serine/threonine-protein kinase PDIK1L	Other	NKF4		Q8N165	no	no	no
CLK1	Dual specificity protein kinase CLK1	CMGC	CLK		P49759	no	no	no
CLK2	Dual specificity protein kinase CLK2	CMGC	CLK		P49760	no	no	no
CLK3	Dual specificity protein kinase CLK3	CMGC	CLK		P49761	no	no	no
CLK4	Dual specificity protein kinase CLK4	CMGC	CLK		Q9HAZ1	no	no	no
MAP3K8	Mitogen-activated protein kinase kinase kinase 8	STE	STE-Unique		P41279	no	no	no
CIT	Citron Rho-interacting kinase	AGC	DMPK		O14578	no	no	no
CDK12	Cyclin-dependent kinase 12	CMGC	CDK	CRK7	Q9NYV4	no	no	no
CSK	Tyrosine-protein kinase CSK	TK	Csk		P41240	no	no	no
MATK	Megakaryocyte-associated tyrosine-protein kinase	TK	Csk		P42679	no	no	no
GUCY2D	Retinal guanylyl cyclase 1	RGC	RGC		Q02846	no	yes	yes
GUCY2F	Retinal guanylyl cyclase 2	RGC	RGC		P51841	no	no	yes
CAMK1	Calcium/calmodulin-dependent protein kinase type 1	CAMK	CAMK1		Q14012	no	no	no
PNCK	Calcium/calmodulin-dependent protein kinase type 1B	CAMK	CAMK1		Q6P2M8	no	no	no
CAMK1D	Calcium/calmodulin-dependent protein kinase type 1D	CAMK	CAMK1		Q8IU85	no	no	no
CAMK1G	Calcium/calmodulin-dependent protein kinase type 1G	CAMK	CAMK1		Q96NX5	no	no	no
CAMK2A	Calcium/calmodulin-dependent protein kinase type II subunit alpha	CAMK	CAMK2		Q9UQM7	no	no	no
CAMK2B	Calcium/calmodulin-dependent protein kinase type II subunit beta	CAMK	CAMK2		Q13554	no	no	no
CAMK2D	Calcium/calmodulin-dependent protein kinase type II subunit delta	CAMK	CAMK2		Q13557	no	no	no
CAMK2G	Calcium/calmodulin-dependent protein kinase (CaM kinase) II gamma	CAMK	CAMK2		Q13555	no	no	no
CAMK4	Calcium/calmodulin-dependent protein kinase type IV	CAMK	CAMK1		Q16566	no	yes	no
CAMKK1	Calcium/calmodulin-dependent protein kinase kinase 1	Other	CAMKK	CAMKK-Meta	Q8N5S9	no	no	no
CAMKK2	Calcium/calmodulin-dependent protein kinase kinase 2	Other	CAMKK	CAMKK-Meta	Q96RR4	no	no	no
TRPM7	Transient receptor potential cation channel subfamily M member 7	Atypical	Alpha	ChaK	Q96QT4	no	no	yes
TRPM6	Transient receptor potential cation channel subfamily M member 6	Atypical	Alpha	ChaK	Q9BX84	no	no	yes
COL4A3BP	Collagen type IV alpha-3-binding protein	Atypical	Col4A3BP		Q9Y5P4	no	no	no
DAPK1	Death-associated protein kinase 1	CAMK	DAPK		P53355	no	no	no
DAPK2	Death-associated protein kinase 2	CAMK	DAPK		Q9UIK4	no	no	no
DAPK3	Death-associated protein kinase 3	CAMK	DAPK		O43293	no	no	no
DCLK1	Serine/threonine-protein kinase DCLK1	CAMK	DCAMKL		O15075	no	no	no
DCLK2	Serine/threonine-protein kinase DCLK2	CAMK	DCAMKL		Q8N568	no	no	no
DCLK3	Serine/threonine-protein kinase DCLK3	CAMK	DCAMKL		Q9C098	no	no	no
DDR1	Epithelial discoidin domain-containing receptor 1	TK	DDR		Q08345	yes	yes	yes
DDR2	Discoidin domain-containing receptor 2	TK	DDR		Q16832	yes	yes	yes
MAP3K12	Mitogen-activated protein kinase kinase kinase 12	TKL	MLK	LZK	Q12852	no	no	no
DMPK	Myotonin-protein kinase	AGC	DMPK	GEK	Q09013	no	no	yes
CDC42BPG	Serine/threonine-protein kinase MRCK gamma	AGC	DMPK	GEK	Q6DT37	no	no	no
PRKDC	DNA-dependent protein kinase catalytic subunit	Atypical	PIKK	DNAPK	P78527	no	no	no
STK17A	Serine/threonine-protein kinase 17A	CAMK	DAPK		Q9UEE5	no	no	no
STK17B	Serine/threonine-protein kinase 17B	CAMK	DAPK		O94768	no	no	no
DYRK1A	Dual specificity tyrosine-phosphorylation-regulated kinase 1A	CMGC	DYRK	DYRK1	Q13627	no	no	no
DYRK1B	Dual specificity tyrosine-phosphorylation-regulated kinase 1B	CMGC	DYRK	DYRK1	Q9Y463	no	no	no
DYRK2	Dual specificity tyrosine-phosphorylation-regulated kinase 2	CMGC	DYRK	DYRK2	Q92630	no	no	no
DYRK3	Dual specificity tyrosine-phosphorylation-regulated kinase 3	CMGC	DYRK	DYRK2	O43781	no	no	no
DYRK4	Dual specificity tyrosine-phosphorylation-regulated kinase 4	CMGC	DYRK	DYRK2	Q9NR20	no	no	no
EGFR	Epidermal growth factor receptor	TK	EGFR		P00533	yes	yes	yes
EPHA1	Ephrin type-A receptor 1	TK	Eph		P21709	yes	yes	yes
EPHA10	Ephrin type-A receptor 10	TK	Eph		Q5JZY3	yes	yes	yes
EPHA2	Ephrin type-A receptor 2	TK	Eph		P29317	yes	yes	yes
EPHA3	Ephrin type-A receptor 3	TK	Eph		P29320	yes	yes	yes
EPHA4	Ephrin type-A receptor 4	TK	Eph		P54764	yes	yes	yes
EPHA5	Ephrin type-A receptor 5	TK	Eph		P54756	yes	yes	yes
EPHA6	Ephrin type-A receptor 6	TK	Eph		Q9UF33	yes	yes	yes
EPHA7	Ephrin type-A receptor 7	TK	Eph		Q15375	yes	yes	yes
EPHA8	Ephrin type-A receptor 8	TK	Eph		P29322	yes	yes	yes
EPHB1	Ephrin type-B receptor 1	TK	Eph		P54762	yes	yes	yes
EPHB2	Ephrin type-B receptor 2	TK	Eph		P29323	yes	yes	yes
EPHB3	Ephrin type-B receptor 3	TK	Eph		P54753	yes	yes	yes
EPHB4	Ephrin type-B receptor 4	TK	Eph		P54760	yes	yes	yes
EPHB6	Ephrin type-B receptor 6	TK	Eph		O15197	yes	yes	yes
ERBB2	Receptor tyrosine-protein kinase erbB-2	TK	EGFR		P04626	yes	yes	yes
ERBB3	Receptor tyrosine-protein kinase erbB-3	TK	EGFR		P21860	yes	yes	yes
ERBB4	Receptor tyrosine-protein kinase erbB-4	TK	EGFR		Q15303	yes	yes	yes
MAPK3	Mitogen-activated protein kinase 3	CMGC	MAPK	ERK1	P27361	no	no	no
MAPK1	Mitogen-activated protein kinase 1	CMGC	MAPK	ERK1	P28482	no	no	no
MAPK6	Mitogen-activated protein kinase 6	CMGC	MAPK	ERK3	Q16659	no	no	no
MAPK4	Mitogen-activated protein kinase 4	CMGC	MAPK	ERK3	P31152	no	no	no
MAPK7	Mitogen-activated protein kinase 7	CMGC	MAPK	ERK5	Q13164	no	no	no
MAPK15	Mitogen-activated protein kinase 15	CMGC	MAPK	ERK7	Q8TD08	no	no	no
PTK2	Focal adhesion kinase 1	TK	FAK		Q05397	no	no	no
FASTK	Fas-activated serine/threonine kinase	Atypical	FAST		Q14296	no	no	no
FER	Tyrosine-protein kinase Fer	TK	Fer		P16591	no	no	no
FES	Tyrosine-protein kinase Fes/Fps	TK	Fer		P07332	no	no	no
FGFR1	Fibroblast growth factor receptor 1	TK	FGFR		P11362	yes	yes	yes
FGFR2	Fibroblast growth factor receptor 2	TK	FGFR		P21802	yes	yes	yes
FGFR3	Fibroblast growth factor receptor 3	TK	FGFR		P22607	yes	yes	yes
FGFR4	Fibroblast growth factor receptor 4	TK	FGFR		P22455	yes	yes	yes
FGR	Tyrosine-protein kinase Fgr	TK	Src		P09769	no	no	no
FLT1	Vascular endothelial growth factor receptor 1	TK	VEGFR		P17948	yes	yes	yes
FLT3	Receptor-type tyrosine-protein kinase FLT3	TK	PDGFR		P36888	yes	yes	yes
FLT4	Vascular endothelial growth factor receptor 3	TK	VEGFR		P35916	yes	yes	yes
CSF1R	Macrophage colony-stimulating factor 1 receptor	TK	PDGFR		P07333	yes	yes	yes
MTOR	Serine/threonine-protein kinase mTOR	Atypical	PIKK	FRAP	P42345	no	no	no
FRK	Tyrosine-protein kinase FRK	TK	Src		P42685	no	no	no
FYN	Tyrosine-protein kinase Fyn	TK	Src		P06241	no	no	no
STK36	Serine/threonine-protein kinase 36	Other	ULK		Q9NRP7	no	no	no
STK19	Serine/threonine-protein kinase 19	Atypical	G11		P49842	no	no	no
GAK	Cyclin-G-associated kinase	Other	NAK		O14976	no	no	no
MAP4K2	Mitogen-activated protein kinase kinase kinase kinase 2	STE	STE20	KHS	Q12851	no	no	no
EIF2AK4	Eukaryotic translation initiation factor 2-alpha kinase 4	Other	PEK	GCN2	Q9P2K8	no	no	no
GRK4	G protein-coupled receptor kinase 4	AGC	GRK	GRK	P32298	no	no	no
GRK5	G protein-coupled receptor kinase 5	AGC	GRK	GRK	P34947	no	no	no
GRK6	G protein-coupled receptor kinase 6	AGC	GRK	GRK	P43250	no	no	no
GRK7	G protein-coupled receptor kinase 7	AGC	GRK	GRK	Q8WTQ7	no	no	no
GSK3A	Glycogen synthase kinase-3 alpha	CMGC	GSK		P49840	no	no	no
GSK3B	Glycogen synthase kinase-3 beta	CMGC	GSK		P49841	no	no	no
	nan	Atypical	GTF2F1		Q6IBK5	no	no	no
HCK	Tyrosine-protein kinase HCK	TK	Src		P08631	no	no	no
MAP4K4	Mitogen-activated protein kinase kinase kinase kinase 4	STE	STE20	MSN	O95819	no	no	no
TNNI3K	Serine/threonine-protein kinase TNNI3K	TKL	MLK	HH498	Q59H18	no	no	no
HIPK1	Homeodomain-interacting protein kinase 1	CMGC	DYRK	HIPK	Q86Z02	no	no	no
HIPK2	Homeodomain-interacting protein kinase 2	CMGC	DYRK	HIPK	Q9H2X6	no	no	no
HIPK3	Homeodomain-interacting protein kinase 3	CMGC	DYRK	HIPK	Q9H422	no	no	no
HIPK4	Homeodomain-interacting protein kinase 4	CMGC	DYRK	HIPK	Q8NE63	no	no	no
MAP4K1	Mitogen-activated protein kinase kinase kinase kinase 1	STE	STE20	KHS	Q92918	no	no	no
EIF2AK1	Eukaryotic translation initiation factor 2-alpha kinase 1	Other	PEK		Q9BQI3	no	no	no
GUCY2C	Heat-stable enterotoxin receptor	RGC	RGC		P25092	yes	yes	yes
HUNK	Hormonally up-regulated neu tumor-associated kinase	CAMK	CAMKL	HUNK	P57058	no	no	no
GSG2	Serine/threonine-protein kinase haspin	Other	Haspin		Q8TF76	no	no	no
ICK	Serine/threonine-protein kinase ICK	CMGC	RCK		Q9UPZ9	no	no	no
IGF1R	Insulin-like growth factor 1 receptor	TK	InsR		P08069	yes	yes	yes
CHUK	Inhibitor of nuclear factor kappa-B kinase subunit alpha	Other	IKK		O15111	no	no	no
IKBKB	Inhibitor of nuclear factor kappa-B kinase subunit beta	Other	IKK		O14920	no	no	no
IKBKE	Inhibitor of nuclear factor kappa-B kinase subunit epsilon	Other	IKK		Q14164	no	no	no
ILK	Integrin-linked protein kinase	TKL	MLK	ILK	Q13418	no	no	no
INSR	Insulin receptor	TK	InsR		P06213	yes	yes	yes
IRAK1	Interleukin-1 receptor-associated kinase 1	TKL	IRAK		P51617	no	no	no
IRAK2	Interleukin-1 receptor-associated kinase-like 2	TKL	IRAK		O43187	no	no	no
IRAK3	Interleukin-1 receptor-associated kinase 3	TKL	IRAK		Q9Y616	no	no	no
IRAK4	Interleukin-1 receptor-associated kinase 4	TKL	IRAK		Q9NWZ3	no	no	no
ERN1	Serine/threonine-protein kinase/endoribonuclease IRE1	Other	IRE		O75460	no	yes	yes
ERN2	Serine/threonine-protein kinase/endoribonuclease IRE2	Other	IRE		Q76MJ5	no	no	yes
INSRR	Insulin receptor-related protein	TK	InsR		P14616	yes	yes	yes
ITK	Tyrosine-protein kinase ITK/TSK	TK	Tec		Q08881	no	no	no
JAK1	Tyrosine-protein kinase JAK1	TK	Jak		P23458	no	no	no
JAK2	Tyrosine-protein kinase JAK2	TK	Jak		O60674	no	no	no
JAK3	Tyrosine-protein kinase JAK3	TK	Jak		P52333	no	no	no
MAPK8	Mitogen-activated protein kinase 8	CMGC	MAPK	JNK	P45983	no	no	no
MAPK9	Mitogen-activated protein kinase 9	CMGC	MAPK	JNK	P45984	no	no	no
MAPK10	Mitogen-activated protein kinase 10	CMGC	MAPK	JNK	P53779	no	no	no
KDR	Vascular endothelial growth factor receptor 2	TK	VEGFR		P35968	yes	yes	yes
MAP4K5	Mitogen-activated protein kinase kinase kinase kinase 5	STE	STE20	KHS	Q9Y4K4	no	no	no
MAP4K3	Mitogen-activated protein kinase kinase kinase kinase 3	STE	STE20	KHS	Q8IVH8	no	no	no
UHMK1	Serine/threonine-protein kinase Kist	Other	KIS		Q8TAS1	no	no	no
KIT	Mast/stem cell growth factor receptor Kit	TK	PDGFR		P10721	yes	yes	yes
KSR1	Kinase suppressor of Ras 1	TKL	RAF	KSR	Q8IVT5	no	no	no
KSR2	Kinase suppressor of Ras 2	TKL	RAF		Q6VAB6	no	no	no
LATS1	Serine/threonine-protein kinase LATS1	AGC	NDR		O95835	no	no	no
LATS2	Serine/threonine-protein kinase LATS2	AGC	NDR		Q9NRM7	no	no	no
LCK	Tyrosine-protein kinase Lck	TK	Src		P06239	no	no	no
LIMK1	LIM domain kinase 1	TKL	LISK	LIMK	P53667	no	no	no
LIMK2	LIM domain kinase 2	TKL	LISK	LIMK	P53671	no	no	no
STK11	Serine/threonine-protein kinase STK11	CAMK	CAMKL	LKB	Q15831	no	no	no
AATK	Serine/threonine-protein kinase LMTK1	TK	Lmr		Q6ZMQ8	no	no	yes
LMTK2	Serine/threonine-protein kinase LMTK2	TK	Lmr		Q8IWU2	no	no	yes
LMTK3	Serine/threonine-protein kinase LMTK3	TK	Lmr		Q96Q04	no	yes	yes
STK10	Serine/threonine-protein kinase 10	STE	STE20	SLK	O94804	no	no	no
LRRK1	Leucine-rich repeat serine/threonine-protein kinase 1	TKL	LRRK		Q38SD2	no	no	no
LRRK2	Leucine-rich repeat serine/threonine-protein kinase 2	TKL	LRRK		Q5S007	no	no	no
LTK	Leukocyte tyrosine kinase receptor	TK	ALK		P29376	yes	yes	yes
LYN	Tyrosine-protein kinase Lyn	TK	Src		P07948	no	no	no
MAP3K13	Mitogen-activated protein kinase kinase kinase 13	TKL	MLK	LZK	O43283	no	no	no
MAK	Serine/threonine-protein kinase MAK	CMGC	RCK		P20794	no	no	no
MAP2K1	Dual specificity mitogen-activated protein kinase kinase 1	STE	STE7		Q02750	no	no	no
MAP2K2	Dual specificity mitogen-activated protein kinase kinase 2	STE	STE7		P36507	no	no	no
MAP2K3	Dual specificity mitogen-activated protein kinase kinase 3	STE	STE7		P46734	no	no	no
MAP2K4	Dual specificity mitogen-activated protein kinase kinase 4	STE	STE7		P45985	no	no	no
MAP2K5	Dual specificity mitogen-activated protein kinase kinase 5	STE	STE7		Q13163	no	no	no
MAP2K6	Dual specificity mitogen-activated protein kinase kinase 6	STE	STE7		P52564	no	no	no
MAP2K7	Dual specificity mitogen-activated protein kinase kinase 7	STE	STE7		O14733	no	no	no
MAP3K1	Mitogen-activated protein kinase kinase kinase 1	STE	STE11		Q13233	no	no	no
MAP3K19	Mitogen-activated protein kinase kinase kinase 19	STE	STE11		Q56UN5	no	no	no
MAP3K2	Mitogen-activated protein kinase kinase kinase 2	STE	STE11		Q9Y2U5	no	no	no
MAP3K3	Mitogen-activated protein kinase kinase kinase 3	STE	STE11		Q99759	no	no	no
MAP3K4	Mitogen-activated protein kinase kinase kinase 4	STE	STE11		Q9Y6R4	no	no	no
MAP3K5	Mitogen-activated protein kinase kinase kinase 5	STE	STE11		Q99683	no	no	no
MAP3K6	Mitogen-activated protein kinase kinase kinase 6	STE	STE11		O95382	no	no	no
MAP3K15	Mitogen-activated protein kinase kinase kinase 15	STE	STE11		Q6ZN16	no	no	no
MAPKAPK2	MAP kinase-activated protein kinase 2	CAMK	MAPKAPK	MK2	P49137	no	no	no
MAPKAPK3	MAP kinase-activated protein kinase 3	CAMK	MAPKAPK	MK2	Q16644	no	no	no
MAPKAPK5	MAP kinase-activated protein kinase 5	CAMK	MAPKAPK	MK5	Q8IW41	no	no	no
MARK1	Serine/threonine-protein kinase MARK1	CAMK	CAMKL	MARK	Q9P0L2	no	no	no
MARK2	Serine/threonine-protein kinase MARK2	CAMK	CAMKL	MARK	Q7KZI7	no	no	no
MARK3	MAP/microtubule affinity-regulating kinase 3	CAMK	CAMKL	MARK	P27448	no	no	no
MARK4	MAP/microtubule affinity-regulating kinase 4	CAMK	CAMKL	MARK	Q96L34	no	no	no
MAST1	Microtubule-associated serine/threonine-protein kinase 1	AGC	MAST		Q9Y2H9	no	no	no
MAST2	Microtubule-associated serine/threonine-protein kinase 2	AGC	MAST		Q6P0Q8	no	no	no
MAST3	Microtubule-associated serine/threonine-protein kinase 3	AGC	MAST		O60307	no	no	no
MAST4	Microtubule-associated serine/threonine-protein kinase 4	AGC	MAST		O15021	no	no	no
MASTL	Serine/threonine-protein kinase greatwall	AGC	MAST		Q96GX5	no	no	no
MELK	Maternal embryonic leucine zipper kinase	CAMK	CAMKL	MELK	Q14680	no	no	no
MERTK	Tyrosine-protein kinase Mer	TK	Axl		Q12866	yes	yes	yes
MET	Hepatocyte growth factor receptor	TK	Met		P08581	yes	yes	yes
MINK1	Misshapen-like kinase 1	STE	STE20	MSN	Q8N4C8	no	no	no
AMHR2	Anti-Muellerian hormone type-2 receptor	TKL	STKR	STKR2	Q16671	yes	yes	yes
MAP3K9	Mitogen-activated protein kinase kinase kinase 9	TKL	MLK	MLK	P80192	no	no	no
MAP3K10	Mitogen-activated protein kinase kinase kinase 10	TKL	MLK	MLK	Q02779	no	no	no
MAP3K11	Mitogen-activated protein kinase kinase kinase 11	TKL	MLK	MLK	Q16584	no	no	no
	Mitogen-activated protein kinase kinase kinase MLK4	TKL	MLK	MLK	Q5TCX8	no	no	no
MLKL	Mixed lineage kinase domain-like protein	TKL	TKL-Unique		Q8NB16	no	no	no
MKNK1	MAP kinase-interacting serine/threonine-protein kinase 1	CAMK	MAPKAPK	MNK	Q9BUB5	no	no	no
MKNK2	MAP kinase-interacting serine/threonine-protein kinase 2	CAMK	MAPKAPK	MNK	Q9HBH9	no	no	no
MOK	MAPK/MAK/MRK overlapping kinase	CMGC	RCK		Q9UQ07	no	no	no
MOS	Proto-oncogene serine/threonine-protein kinase mos	Other	MOS		P00540	no	no	no
STK16	Serine/threonine-protein kinase 16	Other	NAK		O75716	no	no	no
CDC42BPA	Serine/threonine-protein kinase MRCK alpha	AGC	DMPK	GEK	Q5VT25	no	no	no
CDC42BPB	Serine/threonine-protein kinase MRCK beta	AGC	DMPK	GEK	Q9Y5S2	no	no	no
RPS6KA5	Ribosomal protein S6 kinase alpha-5	AGC	RSK	MSK	O75582	no	no	no
RPS6KA4	Ribosomal protein S6 kinase alpha-4	AGC	RSK	MSK	O75676	no	no	no
SRPK3	SRSF protein kinase 3	CMGC	SRPK		Q9UPE1	no	no	no
STK4	Serine/threonine-protein kinase 4	STE	STE20	MST	Q13043	no	no	no
STK3	Serine/threonine-protein kinase 3	STE	STE20	MST	Q13188	no	no	no
STK24	Serine/threonine-protein kinase 24	STE	STE20	YSK	Q9Y6E0	no	no	no
STK26	Serine/threonine-protein kinase MST4	STE	STE20	YSK	Q9P289	no	no	no
MUSK	Muscle	TK	Musk		O15146	yes	yes	yes
MYO3A	Myosin-IIIa	STE	STE20	NinaC	Q8NEV4	no	no	no
MYO3B	Myosin-IIIb	STE	STE20	NinaC	Q8WXR4	no	no	no
PKMYT1	Membrane-associated tyrosine- and threonine-specific cdc2-inhibitory kinase	Other	WEE		Q99640	no	no	no
STK38	Serine/threonine-protein kinase 38	AGC	NDR		Q15208	no	no	no
STK38L	Serine/threonine-protein kinase 38-like	AGC	NDR		Q9Y2H1	no	no	no
NEK1	Serine/threonine-protein kinase Nek1	Other	NEK		Q96PY6	no	no	no
NEK10	Serine/threonine-protein kinase Nek10	Other	NEK		Q6ZWH5	no	no	no
NEK11	Serine/threonine-protein kinase Nek11	Other	NEK		Q8NG66	no	no	no
NEK2	Serine/threonine-protein kinase Nek2	Other	NEK		P51955	no	no	no
NEK3	Serine/threonine-protein kinase Nek3	Other	NEK		P51956	no	no	no
NEK4	Serine/threonine-protein kinase Nek4	Other	NEK		P51957	no	no	no
NEK5	Serine/threonine-protein kinase Nek5	Other	NEK		Q6P3R8	no	no	no
NEK6	Serine/threonine-protein kinase Nek6	Other	NEK		Q9HC98	no	no	no
NEK7	Serine/threonine-protein kinase Nek7	Other	NEK		Q8TDX7	no	no	no
NEK8	Serine/threonine-protein kinase Nek8	Other	NEK		Q86SG6	no	no	no
NEK9	Serine/threonine-protein kinase Nek9	Other	NEK		Q8TD19	no	no	no
MAP3K14	Mitogen-activated protein kinase kinase kinase 14	STE	STE-Unique		Q99558	no	no	no
NIM1K	Serine/threonine-protein kinase NIM1	CAMK	CAMKL	NIM1	Q8IY84	no	no	no
NLK	Serine/threonine-protein kinase NLK	CMGC	MAPK	nmo	Q9UBE8	no	no	no
NRBP1	Nuclear receptor-binding protein	Other	NRBP		Q9UHY1	no	no	no
NRBP2	Nuclear receptor-binding protein 2	Other	NRBP		Q9NSY0	no	no	no
NRK	Nik-related protein kinase	STE	STE20	MSN	Q7Z2Y5	no	no	no
NUAK1	NUAK family SNF1-like kinase 1	CAMK	CAMKL	NuaK	O60285	no	no	no
NUAK2	NUAK family SNF1-like kinase 2	CAMK	CAMKL	NuaK	Q9H093	no	no	no
OXSR1	Serine/threonine-protein kinase OSR1	STE	STE20	FRAY	O95747	no	no	no
OBSCN	Obscurin	CAMK	Trio		Q5VST9	no	no	no
PAK1	Serine/threonine-protein kinase PAK 1	STE	STE20	PAKA	Q13153	no	no	no
PAK2	Serine/threonine-protein kinase PAK 2	STE	STE20	PAKA	Q13177	no	no	no
PAK3	Serine/threonine-protein kinase PAK 3	STE	STE20	PAKA	O75914	no	no	no
PAK4	Serine/threonine-protein kinase PAK 4	STE	STE20	PAKB	O96013	no	no	no
PAK7	Serine/threonine-protein kinase PAK 7	STE	STE20	PAKB	Q9P286	no	no	no
PAK6	Serine/threonine-protein kinase PAK 6	STE	STE20	PAKB	Q9NQU5	no	no	no
PAN3	PAB-dependent poly(A)-specific ribonuclease subunit 3	Other	PAN3		Q58A45	no	no	no
PASK	PAS domain-containing serine/threonine-protein kinase	CAMK	CAMKL	PASK	Q96RG2	no	no	no
PBK	Lymphokine-activated killer T-cell-originated protein kinase	Other	TOPK		Q96KB5	no	no	no
CDK16	Cyclin-dependent kinase 16	CMGC	CDK	PCTAIRE	Q00536	no	no	no
CDK17	Cyclin-dependent kinase 17	CMGC	CDK	PCTAIRE	Q00537	no	no	no
CDK18	Cyclin-dependent kinase 18	CMGC	CDK	PCTAIRE	Q07002	no	no	no
PDGFRA	Platelet-derived growth factor receptor alpha	TK	PDGFR		P16234	yes	yes	yes
PDGFRB	Platelet-derived growth factor receptor beta	TK	PDGFR		P09619	yes	yes	yes
PDK1	[Pyruvate dehydrogenase [lipoamide]] kinase isozyme 1	Atypical	PDHK		Q15118	no	no	no
PDK2	[Pyruvate dehydrogenase [lipoamide]] kinase isozyme 2	Atypical	PDHK		Q15119	no	no	no
PDK3	[Pyruvate dehydrogenase [lipoamide]] kinase isozyme 3	Atypical	PDHK		Q15120	no	no	no
PDK4	[Pyruvate dehydrogenase [lipoamide]] kinase isozyme 4	Atypical	PDHK		Q16654	no	no	no
PDPK1	3-phosphoinositide-dependent protein kinase 1	AGC	PDK1		O15530	no	no	no
EIF2AK3	Eukaryotic translation initiation factor 2-alpha kinase 3	Other	PEK	PEK	Q9NZJ5	no	yes	yes
CDK14	Cyclin-dependent kinase 14	CMGC	CDK	PFTAIRE	O94921	no	no	no
CDK15	Cyclin-dependent kinase 15	CMGC	CDK	PFTAIRE	Q96Q40	no	no	no
PHKG1	Phosphorylase b kinase gamma catalytic chain	CAMK	PHK		Q16816	no	no	no
PHKG2	Phosphorylase b kinase gamma catalytic chain	CAMK	PHK		P15735	no	no	no
PIK3R4	Phosphoinositide 3-kinase regulatory subunit 4	Other	VPS15		Q99570	no	no	no
PIM1	Serine/threonine-protein kinase pim-1	CAMK	PIM		P11309	no	no	no
PIM2	Serine/threonine-protein kinase pim-2	CAMK	PIM		Q9P1W9	no	no	no
PIM3	Serine/threonine-protein kinase pim-3	CAMK	PIM		Q86V86	no	no	no
PINK1	Serine/threonine-protein kinase PINK1	Other	NKF2		Q9BXM7	no	no	yes
CDK11B	Cyclin-dependent kinase 11B	CMGC	CDK	CDK11	P21127	no	no	no
PRKACA	cAMP-dependent protein kinase catalytic subunit alpha	AGC	PKA		P17612	no	no	no
PRKACB	cAMP-dependent protein kinase catalytic subunit beta	AGC	PKA		P22694	no	no	no
PRKACG	cAMP-dependent protein kinase catalytic subunit gamma	AGC	PKA		P22612	no	no	no
PRKCA	Protein kinase C alpha type	AGC	PKC	PKCa	P17252	no	no	no
PRKCB	Protein kinase C beta type	AGC	PKC	PKCa	P05771	no	no	no
PRKCD	Protein kinase C delta type	AGC	PKC	PKCd	Q05655	no	no	no
PRKCE	Protein kinase C epsilon type	AGC	PKC	PKCh	Q02156	no	no	no
PRKCG	Protein kinase C gamma type	AGC	PKC	PKCa	P05129	no	no	no
PRKCH	Protein kinase C eta type	AGC	PKC	PKCh	P24723	no	no	no
PRKCI	Protein kinase C iota type	AGC	PKC	PKCi	P41743	no	no	no
PRKCQ	Protein kinase C theta type	AGC	PKC	PKCd	Q04759	no	no	no
PRKCZ	Protein kinase C zeta type	AGC	PKC	PKCi	Q05513	no	no	no
PRKD1	Serine/threonine-protein kinase D1	CAMK	PKD		Q15139	no	no	no
PRKD2	Serine/threonine-protein kinase D2	CAMK	PKD		Q9BZL6	no	no	no
PRKD3	Serine/threonine-protein kinase D3	CAMK	PKD		O94806	no	no	no
PRKG1	cGMP-dependent protein kinase	AGC	PKG		Q13976	no	no	no
PRKG2	cGMP-dependent protein kinase 2	AGC	PKG		Q13237	no	no	no
PKN1	Serine/threonine-protein kinase N1	AGC	PKN		Q16512	no	no	no
PKN2	Serine/threonine-protein kinase N2	AGC	PKN		Q16513	no	no	no
PKN3	Serine/threonine-protein kinase N3	AGC	PKN		Q6P5Z2	no	no	no
EIF2AK2	Interferon-induced	Other	PEK		P19525	no	no	no
PLK1	Serine/threonine-protein kinase PLK1	Other	PLK		P53350	no	no	no
PLK2	Serine/threonine-protein kinase PLK2	Other	PLK		Q9NYY3	no	no	no
PLK3	Serine/threonine-protein kinase PLK3	Other	PLK		Q9H4B4	no	no	no
PLK4	Serine/threonine-protein kinase PLK4	Other	PLK		O00444	no	no	no
PRKX	cAMP-dependent protein kinase catalytic subunit PRKX	AGC	PKA		P51817	no	no	no
PRKY	Serine/threonine-protein kinase PRKY	AGC	PKA		O43930	no	no	no
PRPF4B	Serine/threonine-protein kinase PRP4 homolog	CMGC	DYRK	PRP4	Q13523	no	no	no
TP53RK	TP53-regulating kinase	Other	Bud32		Q96S44	no	no	no
PSKH1	Serine/threonine-protein kinase H1	CAMK	PSK		P11801	no	no	no
PSKH2	Serine/threonine-protein kinase H2	CAMK	PSK		Q96QS6	no	no	no
PTK2B	Protein-tyrosine kinase 2-beta	TK	FAK		Q14289	no	no	no
SIK2	Serine/threonine-protein kinase SIK2	CAMK	CAMKL	QIK	Q9H0K1	no	no	no
SIK3	Serine/threonine-protein kinase SIK3	CAMK	CAMKL	QIK	Q9Y2K2	no	no	no
RAF1	RAF proto-oncogene serine/threonine-protein kinase	TKL	RAF		P04049	no	no	no
RET	Proto-oncogene tyrosine-protein kinase receptor Ret	TK	Ret		P07949	yes	yes	yes
GRK1	Rhodopsin kinase	AGC	GRK	GRK	Q15835	no	no	no
RIOK1	Serine/threonine-protein kinase RIO1	Atypical	RIO	RIO1	Q9BRS2	no	no	no
RIOK2	Serine/threonine-protein kinase RIO2	Atypical	RIO	RIO2	Q9BVS4	no	no	no
RIOK3	Serine/threonine-protein kinase RIO3	Atypical	RIO	RIO3	O14730	no	no	no
RIPK1	Receptor-interacting serine/threonine-protein kinase 1	TKL	RIPK		Q13546	no	no	no
RIPK2	Receptor-interacting serine/threonine-protein kinase 2	TKL	RIPK		O43353	no	no	no
RIPK3	Receptor-interacting serine/threonine-protein kinase 3	TKL	RIPK		Q9Y572	no	no	no
RNASEL	2-5A-dependent ribonuclease	Other	Other-Unique		Q05823	no	no	no
ROCK1	Rho-associated protein kinase 1	AGC	DMPK	ROCK	Q13464	no	no	no
ROCK2	Rho-associated protein kinase 2	AGC	DMPK	ROCK	O75116	no	no	no
MST1R	Macrophage-stimulating protein receptor	TK	Met		Q04912	yes	yes	yes
ROR1	Tyrosine-protein kinase transmembrane receptor ROR1	TK	Ror		Q01973	yes	yes	yes
ROR2	Tyrosine-protein kinase transmembrane receptor ROR2	TK	Ror		Q01974	yes	yes	yes
ROS1	Proto-oncogene tyrosine-protein kinase ROS	TK	Sev		P08922	yes	yes	yes
RPS6KA1	Ribosomal protein S6 kinase alpha-1	AGC	RSK	RSKp90	Q15418	no	no	no
RPS6KA3	Ribosomal protein S6 kinase alpha-3	AGC	RSK	RSKp90	P51812	no	no	no
RPS6KA2	Ribosomal protein S6 kinase alpha-2	AGC	RSK	RSKp90	Q15349	no	no	no
RPS6KA6	Ribosomal protein S6 kinase alpha-6	AGC	RSK	RSKp90	Q9UK32	no	no	no
RPS6KC1	Ribosomal protein S6 kinase delta-1	AGC	RSKL		Q96S38	no	no	no
RPS6KL1	Ribosomal protein S6 kinase-like 1	AGC	RSKL		Q9Y6S9	no	no	no
RYK	Tyrosine-protein kinase RYK	TK	Ryk		P34925	yes	yes	yes
SBK1	Serine/threonine-protein kinase SBK1	Other	NKF1		Q52WX2	no	no	no
SCYL1	N-terminal kinase-like protein	Other	SCY1		Q96KG9	no	no	no
SCYL2	SCY1-like protein 2	Other	SCY1		Q6P3W7	no	no	no
SCYL3	Protein-associating with the carboxyl-terminal domain of ezrin	Other	SCY1		Q8IZE3	no	no	no
SGK1	Serine/threonine-protein kinase Sgk1	AGC	SGK		O00141	no	no	no
SGK2	Serine/threonine-protein kinase Sgk2	AGC	SGK		Q9HBY8	no	no	no
SGK3	Serine/threonine-protein kinase Sgk3	AGC	SGK		Q96BR1	no	no	no
SIK1	Serine/threonine-protein kinase SIK1	CAMK	CAMKL	QIK	P57059	no	no	no
SLK	STE20-like serine/threonine-protein kinase	STE	STE20	SLK	Q9H2G2	no	no	no
SMG1	Serine/threonine-protein kinase SMG1	Atypical	PIKK	SMG1	Q96Q15	no	no	no
SNRK	SNF-related serine/threonine-protein kinase	CAMK	CAMKL	SNRK	Q9NRH2	no	no	no
SPEG	Striated muscle preferentially expressed protein kinase	CAMK	Trio		Q15772	no	no	no
SRC	Proto-oncogene tyrosine-protein kinase Src	TK	Src		P12931	no	no	no
SRMS	Tyrosine-protein kinase Srms	TK	Src		Q9H3Y6	no	no	no
SRPK1	SRSF protein kinase 1	CMGC	SRPK		Q96SB4	no	no	no
SRPK2	SRSF protein kinase 2	CMGC	SRPK		P78362	no	no	no
TSSK6	Testis-specific serine/threonine-protein kinase 6	CAMK	TSSK		Q9BXA6	no	no	no
STK33	Serine/threonine-protein kinase 33	CAMK	STK33		Q9BYT3	no	no	no
STK39	STE20/SPS1-related proline-alanine-rich protein kinase	STE	STE20	FRAY	Q9UEW8	no	no	no
STRADA	STE20-related kinase adapter protein alpha	STE	STE20	STLK	Q7RTN6	no	no	no
STRADB	STE20-related kinase adapter protein beta	STE	STE20	STLK	Q9C0K7	no	no	no
SYK	Tyrosine-protein kinase SYK	TK	Syk		P43405	no	no	no
SBK2	Serine/threonine-protein kinase SBK2	Other	NKF1		P0C263	no	no	no
STKLD1	Protein kinase-like protein SgK071	Other	SgK071		Q8NE28	no	no	no
MYLK4	Myosin light chain kinase family member 4	CAMK	MLCK		Q86YV6	no	no	no
SBK3	Putative uncharacterized serine/threonine-protein kinase SgK110	Other	NKF1		P0C264	no	no	no
POMK	Protein kinase-like protein SgK196	Other	Other-Unique		Q9H5K3	no	yes	yes
	Tyrosine-protein kinase SgK223	Other	NKF3		Q86YV5	no	no	no
PEAK1	Pseudopodium-enriched atypical kinase 1	Other	NKF3		Q9H792	no	no	no
ANKK1	Ankyrin repeat and protein kinase domain-containing protein 1	TKL	RIPK		Q8NFD2	no	no	no
TEX14	Inactive serine/threonine-protein kinase TEX14	Other	NKF5		Q8IWB6	no	no	no
STK31	Serine/threonine-protein kinase 31	Other	Other-Unique		Q9BXU1	no	no	no
PKDCC	Protein kinase domain-containing protein	Other	SgK493		Q504Y2	no	yes	no
	Uncharacterized serine/threonine-protein kinase SgK494	AGC	RSKR		Q96LW2	no	no	no
STK40	Serine/threonine-protein kinase 40	CAMK	SgK495		Q8N2I9	no	no	no
DSTYK	Dual serine/threonine and tyrosine protein kinase	Other	Dusty		Q6XUX3	no	no	no
PXK	PX domain-containing protein kinase-like protein	Other	Slob		Q7Z7A4	no	no	no
STYK1	Tyrosine-protein kinase STYK1	TK	TK-Unique		Q6J9G0	no	no	yes
TAF1	Transcription initiation factor TFIID subunit 1	Atypical	TAF1		P21675	no	no	no
TAF1L	Transcription initiation factor TFIID subunit 1-like	Atypical	TAF1		Q8IZX4	no	no	no
MAP3K7	Mitogen-activated protein kinase kinase kinase 7	TKL	MLK	TAK1	O43318	no	no	no
TAOK1	Serine/threonine-protein kinase TAO1	STE	STE20	TAO	Q7L7X3	no	no	no
TAOK2	Serine/threonine-protein kinase TAO2	STE	STE20	TAO	Q9UL54	no	no	yes
TAOK3	Serine/threonine-protein kinase TAO3	STE	STE20	TAO	Q9H2K8	no	no	no
TBCK	TBC domain-containing protein kinase-like protein	Other	TBCK		Q8TEA7	no	no	no
TBK1	Serine/threonine-protein kinase TBK1	Other	IKK		Q9UHD2	no	no	no
TEC	Tyrosine-protein kinase Tec	TK	Tec		P42680	no	no	no
TESK1	Dual specificity testis-specific protein kinase 1	TKL	LISK	TESK	Q15569	no	no	no
TESK2	Dual-specificity testis-specific protein kinase 2	TKL	LISK	TESK	Q96S53	no	no	no
TGFBR1	TGF-beta receptor type-1	TKL	STKR	STKR1	P36897	yes	yes	yes
TGFBR2	TGF-beta receptor type-2	TKL	STKR	STKR2	P37173	yes	yes	yes
TIE1	Tyrosine-protein kinase receptor Tie-1	TK	Tie		P35590	yes	yes	yes
TEK	Angiopoietin-1 receptor	TK	Tie		Q02763	yes	yes	yes
TRIM66	Tripartite motif-containing protein 66	Atypical	TIF1		B5MCJ9	no	no	no
TRIM24	Transcription intermediary factor 1-alpha	Atypical	TIF1		O15164	no	no	no
TRIM28	Transcription intermediary factor 1-beta	Atypical	TIF1		Q13263	no	no	no
TRIM33	E3 ubiquitin-protein ligase TRIM33	Atypical	TIF1		Q9UPN9	no	no	no
TLK1	Serine/threonine-protein kinase tousled-like 1	Other	TLK		Q9UKI8	no	no	no
TLK2	Serine/threonine-protein kinase tousled-like 2	Other	TLK		Q86UE8	no	no	no
TNIK	TRAF2 and NCK-interacting protein kinase	STE	STE20	MSN	Q9UKE5	no	no	no
TNK1	Non-receptor tyrosine-protein kinase TNK1	TK	Ack		Q13470	no	no	no
NTRK1	High affinity nerve growth factor receptor	TK	Trk		P04629	yes	yes	yes
NTRK2	BDNF/NT-3 growth factors receptor	TK	Trk		Q16620	yes	yes	yes
NTRK3	NT-3 growth factor receptor	TK	Trk		Q16288	yes	yes	yes
TRRAP	Transformation/transcription domain-associated protein	Atypical	PIKK	TRRAP	Q9Y4A5	no	no	no
TSSK1B	Testis-specific serine/threonine-protein kinase 1	CAMK	TSSK		Q9BXA7	no	no	no
TSSK2	Testis-specific serine/threonine-protein kinase 2	CAMK	TSSK		Q96PF2	no	no	no
TSSK3	Testis-specific serine/threonine-protein kinase 3	CAMK	TSSK		Q96PN8	no	no	no
TSSK4	Testis-specific serine/threonine-protein kinase 4	CAMK	TSSK		Q6SA08	no	no	no
TTBK1	Tau-tubulin kinase 1	CK1	TTBK		Q5TCY1	no	no	no
TTBK2	Tau-tubulin kinase 2	CK1	TTBK		Q6IQ55	no	no	no
TTK	Dual specificity protein kinase TTK	Other	TTK		P33981	no	no	no
TTN	Titin	CAMK	MLCK		Q8WZ42	no	no	no
TXK	Tyrosine-protein kinase TXK	TK	Tec		P42681	no	no	no
TYK2	Non-receptor tyrosine-protein kinase TYK2	TK	Jak		P29597	no	no	no
TYRO3	Tyrosine-protein kinase receptor TYRO3	TK	Axl		Q06418	yes	yes	yes
KALRN	HCG2039851	CAMK	Trio		O60229	no	no	no
TRIB1	Tribbles homolog 1	CAMK	Trbl		Q96RU8	no	no	no
TRIB2	Tribbles homolog 2	CAMK	Trbl		Q92519	no	no	no
TRIB3	Tribbles homolog 3	CAMK	Trbl		Q96RU7	no	no	no
TRIO	Triple functional domain protein	CAMK	Trio		O75962	no	no	no
ULK1	Serine/threonine-protein kinase ULK1	Other	ULK		O75385	no	no	no
ULK2	Serine/threonine-protein kinase ULK2	Other	ULK		Q8IYT8	no	no	no
ULK3	Serine/threonine-protein kinase ULK3	Other	ULK		Q6PHR2	no	no	no
ULK4	Serine/threonine-protein kinase ULK4	Other	ULK		Q96C45	no	no	no
CAMKV	CaM kinase-like vesicle-associated protein	CAMK	CAMK-Unique		Q8NCB2	no	no	no
VRK1	Serine/threonine-protein kinase VRK1	CK1	VRK		Q99986	no	no	no
VRK2	Serine/threonine-protein kinase VRK2	CK1	VRK		Q86Y07	no	no	yes
VRK3	Inactive serine/threonine-protein kinase VRK3	CK1	VRK		Q8IV63	no	no	no
WEE1	Wee1-like protein kinase	Other	WEE		P30291	no	no	no
WEE2	Wee1-like protein kinase 2	Other	WEE		P0C1S8	no	no	no
WNK1	Serine/threonine-protein kinase WNK1	Other	WNK		Q9H4A3	no	yes	no
WNK2	Serine/threonine-protein kinase WNK2	Other	WNK		Q9Y3S1	no	no	no
WNK3	Serine/threonine-protein kinase WNK3	Other	WNK		Q9BYP7	no	no	no
WNK4	Serine/threonine-protein kinase WNK4	Other	WNK		Q96J92	no	no	no
STK32A	Serine/threonine-protein kinase 32A	AGC	YANK		Q8WU08	no	no	no
STK32B	Serine/threonine-protein kinase 32B	AGC	YANK		Q9NY57	no	no	no
STK32C	Serine/threonine-protein kinase 32C	AGC	YANK		Q86UX6	no	no	no
YES1	Tyrosine-protein kinase Yes	TK	Src		P07947	no	no	no
STK25	Serine/threonine-protein kinase 25	STE	STE20	YSK	O00506	no	no	no
	Mitogen-activated protein kinase kinase kinase MLT	TKL	MLK	ZAK	Q9NYL2	no	no	no
ZAP70	Tyrosine-protein kinase ZAP-70	TK	Syk		P43403	no	no	no
MYLK3	Myosin light chain kinase 3	CAMK	MLCK		Q32MK0	no	no	no
EEF2K	Eukaryotic elongation factor 2 kinase	Atypical	Alpha	eEF2K	O00418	no	no	no
MAPK14	Mitogen-activated protein kinase 14	CMGC	MAPK	p38	Q16539	no	no	no
MAPK11	Mitogen-activated protein kinase 11	CMGC	MAPK	p38	Q15759	no	no	no
MAPK13	Mitogen-activated protein kinase 13	CMGC	MAPK	p38	O15264	no	no	no
MAPK12	Mitogen-activated protein kinase 12	CMGC	MAPK	p38	P53778	no	no	no
RPS6KB1	Ribosomal protein S6 kinase beta-1	AGC	RSK	RSKp70	P23443	no	no	no
RPS6KB2	Ribosomal protein S6 kinase beta-2	AGC	RSK	RSKp70	Q9UBS0	no	no	no
MYLK2	Myosin light chain kinase 2	CAMK	MLCK		Q9H1R3	no	no	no
MYLK	Myosin light chain kinase	CAMK	MLCK		Q15746	no	no	no

## Sheet: Table_S3
Table S3. PBS-TPP 52 °C Bayes t-test results.
Log2FC	Log10P.Value	Log10adj.P.Val	P.Value	Genes	8 chaps-unique targets	Name	PG.UID	DMSO_1	DMSO_2	DMSO_3	DMSO_4	stau_1	stau_2	stau_3	stau_4	CV_control	CV_treatment	is.kinase
0.166208	1.13085	3.13e-09	0.0739859	TAOK3	YES	Serine/threonine-protein kinase TAO3	Q9H2K8	13.1367	12.9845	13.1936	12.9112	13.3902	13.1731	13.1844	13.1432	0.0905026	0.10004	yes
0.0703508	0.9295	3.13e-09	0.117625	PRKAA1	YES	5'-AMP-activated protein kinase catalytic subunit alpha-1	Q13131	14.1346	14.1292	14.2073	14.1178	14.2223	14.186	14.2338	14.2281	0.0285337	0.0332289	yes
0.0680382	0.743239	3.13e-09	0.180618	SLK	YES	STE20-like serine/threonine-protein kinase	Q9H2G2	14.4163	14.3534	14.3643	14.4897	14.4446	14.5107	14.427	14.5134	0.0435922	0.0427953	yes
0.0632484	0.591427	3.13e-09	0.256197	PRKAB1	YES	5'-AMP-activated protein kinase subunit beta-1	Q9Y478	13.4696	13.5056	13.4337	13.6002	13.5347	13.5229	13.6013	13.6032	0.0502461	0.0442815	yes
0.152373	0.398955	3.13e-09	0.399066	STK10	YES	Serine/threonine-protein kinase 10	O94804	11.3962	11.0148	11.1022	11.0742	10.8248	11.6359	11.2798	11.4564	0.123809	0.18579	yes
0.155189	0.333185	3.13e-09	0.464317	CDK8;CDK19	YES	Cyclin-dependent kinase 8;Cyclin-dependent kinase 19	P49336;Q9BWU1	11.293	11.7444	10.8952	11.5115	11.3062	11.2065	11.7267	11.8255	0.239984	0.214431	yes
0.0227965	0.131953	3.13e-09	0.737984	PRKAG1	YES	5'-AMP-activated protein kinase subunit gamma-1	P54619	13.428	13.5237	13.4416	13.4862	13.5579	13.3109	13.5399	13.5621	0.0303474	0.0576702	yes
0.0048642	0.0193051	3.13e-09	0.956522	TAOK1	YES	Serine/threonine-protein kinase TAO1	Q7L7X3	12.8917	12.8276	13.0657	12.6757	12.9692	12.9089	12.8211	12.7808	0.112465	0.0831759	yes
0.771444	7.58346	3.9965	2.61e-08	CDK5		Cyclin-dependent-like kinase 5	Q00535	14.2775	14.2142	14.1909	14.2557	14.944	14.9994	15.0753	15.0052	0.0271755	0.281337	yes
0.829536	7.34439	3.9965	4.52e-08	FECH		Ferrochelatase, mitochondrial	P22830	14.9001	14.8155	14.8362	14.897	15.6155	15.6276	15.7844	15.7395	0.0296578	0.303825	no
0.831237	7.24887	3.9965	5.64e-08	BMP2K		BMP-2-inducible protein kinase	Q9NSY1	13.0151	12.9459	12.9377	12.9232	13.7592	13.7116	13.8631	13.8129	0.0286595	0.302681	yes
0.721352	6.54972	3.48877	2.82e-07	GRK2		Beta-adrenergic receptor kinase 1	P25098	13.2431	13.2272	13.2627	13.1451	13.989	13.8316	13.979	13.964	0.0353299	0.265769	yes
0.826726	6.51929	3.48877	3.02e-07	PHKG2		Phosphorylase b kinase gamma catalytic chain, liver/testis isoform	P15735	12.3873	12.4632	12.3614	12.3094	13.1742	13.1106	13.2971	13.2464	0.0446471	0.302875	yes
0.680941	6.35571	3.48327	4.41e-07	CSK		Tyrosine-protein kinase CSK	P41240	13.2547	13.1896	13.1433	13.1131	13.892	13.781	13.9203	13.8311	0.0430134	0.251069	yes
1.47154	6.31335	3.48327	4.86e-07	PAK4		Serine/threonine-protein kinase PAK 4	O96013	10.8923	11.2003	11.2201	11.2744	12.7407	12.3691	12.7662	12.5973	0.113046	0.517554	yes
0.787432	6.30966	3.48327	4.9e-07	MAP2K2		Dual specificity mitogen-activated protein kinase kinase 2	P36507	12.8995	12.9905	12.8554	12.7589	13.615	13.6098	13.7414	13.6877	0.0666224	0.28834	yes
1.59271	5.71455	2.97398	1.93e-06	CAMKK2		Calcium/calmodulin-dependent protein kinase kinase 2	Q96RR4	8.90688	8.85857	8.99969	8.55231	10.4626	10.374	10.3595	10.4922	0.127647	0.537839	yes
0.414796	5.68446	2.97398	2.07e-06	CSNK2A2		Casein kinase II subunit alpha'	P19784	14.5146	14.5812	14.4939	14.5521	14.959	14.9102	14.9667	14.965	0.0269754	0.153929	yes
0.373831	5.66208	2.97398	2.18e-06	CDK2		Cyclin-dependent kinase 2	P24941	16.0679	16.0139	15.9869	16.0482	16.3849	16.4019	16.4323	16.3931	0.0248831	0.138793	yes
0.991197	5.5319	2.88159	2.94e-06	GSK3A		Glycogen synthase kinase-3 alpha	P49840	12.7868	12.4514	12.6623	12.4157	13.7121	13.4471	13.4938	13.6281	0.123145	0.363732	yes
0.422423	5.38672	2.77117	4.1e-06	ADK		Adenosine kinase	P55263	15.2241	15.2295	15.2125	15.2625	15.6432	15.5672	15.6823	15.7255	0.0149398	0.159816	yes
0.788582	5.23041	2.64705	5.88e-06	AURKA		Aurora kinase A	O14965	11.8768	11.6898	11.9443	11.983	12.5249	12.6596	12.7542	12.7097	0.0873143	0.292953	yes
0.72434	5.10992	2.55653	7.76e-06	MAP2K7		Dual specificity mitogen-activated protein kinase kinase 7	O14733	11.2833	11.0445	11.0753	11.1881	11.825	11.9171	11.9144	11.832	0.076559	0.26626	yes
0.587014	5.07313	2.54776	8.45e-06	STK38		Serine/threonine-protein kinase 38	Q15208	12.3587	12.52	12.3394	12.3011	12.9825	12.882	12.9908	13.0119	0.068656	0.219166	yes
0.64726	4.89688	2.39784	1.27e-05	MAP2K1		Dual specificity mitogen-activated protein kinase kinase 1	Q02750	14.441	14.3436	14.332	14.5668	14.9889	14.9338	15.1625	15.1874	0.0768467	0.249288	yes
0.474047	4.73402	2.2598	1.84e-05	PRKACA		cAMP-dependent protein kinase catalytic subunit alpha	P17612	12.7019	12.6008	12.7368	12.6028	13.1003	13.0907	13.1253	13.2222	0.0481493	0.178892	yes
0.541341	4.6597	2.22672	2.19e-05	IRAK4		Interleukin-1 receptor-associated kinase 4	Q9NWZ3	13.0455	12.7686	12.959	12.978	13.4238	13.4479	13.5477	13.4971	0.0799082	0.203975	yes
0.478981	4.65517	2.22672	2.21e-05	CHEK1		Serine/threonine-protein kinase Chk1	O14757	13.4752	13.5218	13.5582	13.4368	14.0683	13.8339	14.0023	14.0034	0.0367786	0.185023	yes
0.534379	4.61308	2.20581	2.44e-05	TLK1		Serine/threonine-protein kinase tousled-like 1	Q9UKI8	12.3637	12.3896	12.2764	12.1823	12.8555	12.7543	12.9255	12.8142	0.0642989	0.202172	yes
1.12837	4.5407	2.15364	2.88e-05	STK25		Serine/threonine-protein kinase 25	O00506	9.89799	10.0593	9.75918	9.88235	11.353	10.7376	10.9515	11.0702	0.086192	0.43525	yes
0.530323	4.41168	2.04392	3.88e-05	STK3		Serine/threonine-protein kinase 3	Q13188	12.361	12.3371	12.3375	12.3295	12.7727	12.7507	13.0166	12.9464	0.0094904	0.20815	yes
0.446002	4.21471	1.86543	6.1e-05	STK24		Serine/threonine-protein kinase 24	Q9Y6E0	14.5878	14.7214	14.6674	14.5908	15.2133	14.9332	15.0925	15.1126	0.0450176	0.17707	yes
0.955162	4.08173	1.75019	8.28e-05	GSK3B		Glycogen synthase kinase-3 beta	P49841	11.7213	11.8371	11.6519	11.5404	12.9885	12.2811	12.5604	12.7414	0.0862921	0.392294	yes
0.283891	4.05357	1.73906	8.84e-05	SRPK1		SRSF protein kinase 1	Q96SB4	14.4392	14.5217	14.4513	14.5527	14.7612	14.7755	14.8139	14.7497	0.0380431	0.107932	yes
0.248914	3.95942	1.66129	0.000109794	ROCK2		Rho-associated protein kinase 2	O75116	14.7673	14.8129	14.7945	14.8379	14.9998	15.0673	15.0634	15.0778	0.0206345	0.0944383	yes
0.325942	3.94068	1.65835	0.000114636	MAPK8		Mitogen-activated protein kinase 8	P45983	13.2975	13.3216	13.3153	13.4132	13.6074	13.6239	13.7205	13.6995	0.0365367	0.125325	yes
0.548639	3.86185	1.59476	0.000137452	MASTL		Serine/threonine-protein kinase greatwall	Q96GX5	10.6897	10.6317	10.6294	10.6037	11.148	11.3252	11.1737	11.1021	0.0253752	0.208988	yes
-0.261538	3.8149	1.56253	0.000153145	U2AF2		Splicing factor U2AF 65 kDa subunit	P26368	16.9211	16.8717	16.9206	16.9403	16.6475	16.7423	16.6227	16.5951	0.0201494	0.101011	no
0.498892	3.70188	1.46376	0.000198663	PDPK1		3-phosphoinositide-dependent protein kinase 1	O15530	12.7408	12.4413	12.7708	12.7215	13.2721	13.1646	13.1568	13.0764	0.100579	0.194371	yes
0.446334	3.6316	1.40726	0.000233561	TLK2		Serine/threonine-protein kinase tousled-like 2	Q86UE8	11.8818	12.1519	11.899	12.0736	12.464	12.4562	12.473	12.3984	0.0922455	0.171279	yes
1.71409	3.506	1.29502	0.00031189	CAMKK1		Calcium/calmodulin-dependent protein kinase kinase 1	Q8N5S9	7.41124	7.57549	6.84572	7.35667	8.7152	9.07482	9.49931	8.75613	0.200561	0.634656	yes
0.41436	3.33363	1.13562	0.000463838	CHEK2		Serine/threonine-protein kinase Chk2	O96017	12.5816	12.6368	12.7317	12.8041	13.1244	13.0004	13.0217	13.2652	0.0686851	0.170221	yes
1.22598	3.10811	0.922691	0.00077963	SEC22A		Vesicle-trafficking protein SEC22a	Q96IW7	9.24639	9.037	9.08845	8.66275	9.57255	10.6086	10.2539	10.5034	0.162293	0.516091	no
0.28443	3.0882	0.921338	0.000816207	GAK		Cyclin-G-associated kinase	O14976	13.532	13.5924	13.4014	13.6342	13.8102	13.7907	13.8506	13.8462	0.0689836	0.112762	yes
0.239879	3.07722	0.921338	0.000837109	PDCD10		Programmed cell death protein 10	Q9BUL8	15.1288	15.1223	15.0012	15.2136	15.3368	15.352	15.3849	15.3518	0.0600116	0.0956122	no
1.05587	3.07104	0.921338	0.000849097	AAK1		AP2-associated protein kinase 1	Q2M2I8	8.41542	8.48245	8.1288	8.70549	9.29862	9.25422	9.61513	9.78766	0.161975	0.413301	yes
0.290902	3.0437	0.905275	0.000904277	CDK9		Cyclin-dependent kinase 9	P50750	14.3794	14.4058	14.3561	14.2303	14.7575	14.5365	14.6177	14.6236	0.052745	0.121238	yes
-0.667047	2.9191	0.791673	0.00120475	PPP6R2		Serine/threonine-protein phosphatase 6 regulatory subunit 2	O75170	13.2506	13.0987	13.0884	13.0976	12.4577	12.1195	12.3861	12.9039	0.0554809	0.266308	no
0.419872	2.90772	0.791012	0.00123675	TNIK		TRAF2 and NCK-interacting protein kinase	Q9UKE5	13.6567	13.5511	13.4955	13.5701	14.2465	13.9958	13.7942	13.9164	0.0467145	0.189686	yes
0.251821	2.69961	0.602308	0.00199706	MAP2K4		Dual specificity mitogen-activated protein kinase kinase 4	P45985	12.4624	12.4216	12.4236	12.4046	12.6379	12.7963	12.6641	12.6212	0.0170192	0.10239	yes
-0.376697	2.69833	0.602308	0.00200296	PHF19		PHD finger protein 19	Q5T6S3	12.4874	12.5393	12.4849	12.5108	11.922	12.2444	12.299	12.0503	0.0176221	0.15266	no
0.520918	2.65323	0.567191	0.00222215	STK38L		Serine/threonine-protein kinase 38-like	Q9Y2H1	11.3742	11.3671	11.425	11.016	12.0528	11.6258	11.7367	11.8508	0.12229	0.225022	yes
0.22319	2.63777	0.561493	0.00230266	PRPF4B		Serine/threonine-protein kinase PRP4 homolog	Q13523	14.6049	14.5993	14.5918	14.7832	14.8163	14.8714	14.9139	14.8703	0.0660765	0.0931315	yes
0.273639	2.62801	0.561279	0.00235499	RPS6KA3		Ribosomal protein S6 kinase alpha-3	P51812	14.8308	14.6736	14.7801	14.5579	15.0011	15.0531	14.9885	14.8943	0.0828196	0.116156	yes
0.367828	2.52008	0.462692	0.00301938	CDK4		Cyclin-dependent kinase 4	P11802	11.8978	11.6993	12.0089	12.0519	12.3349	12.3853	12.217	12.192	0.105718	0.154558	yes
0.169957	2.50807	0.461614	0.00310407	CSNK2B		Casein kinase II subunit beta	P67870	16.2732	16.2926	16.3471	16.3031	16.5584	16.4244	16.4901	16.4229	0.0218044	0.0717777	yes
0.363756	2.50091	0.461614	0.00315568	PASK		PAS domain-containing serine/threonine-protein kinase	Q96RG2	11.4412	11.299	11.4948	11.3299	11.632	11.6933	11.7471	11.9476	0.0640337	0.157391	yes
0.510074	2.49094	0.46042	0.00322895			Uncharacterized protein FLJ45252	Q6ZSR9	11.094	10.8208	10.6439	10.8566	11.3134	11.3749	11.6074	11.1599	0.130222	0.223884	no
1.68277	2.47144	0.449517	0.00337726	STK17B		Serine/threonine-protein kinase 17B	O94768	7.53706	6.88328	6.40964	6.06133	8.31401	7.94023	8.75154	8.61663	0.459914	0.607272	yes
0.264595	2.45468	0.441191	0.00351014	CDK12		Cyclin-dependent kinase 12	Q9NYV4	11.8771	11.9183	11.8006	11.7939	12.2236	12.0804	12.0754	12.069	0.0420302	0.107937	yes
0.483976	2.39249	0.387278	0.00405051	DST		Dystonin	Q03001	12.4567	12.422	12.3963	12.9091	12.8043	13.1518	13.1259	13.038	0.181891	0.21597	no
0.307982	2.38345	0.386357	0.00413569	PNPO		Pyridoxine-5'-phosphate oxidase	Q9NVS9	14.1955	14.416	14.3723	14.3641	14.8599	14.5227	14.6356	14.5617	0.0653708	0.14443	no
0.654551	2.30954	0.320418	0.00490294	TMEM263		Transmembrane protein 263	Q8WUH6	12.0222	11.8402	11.8316	11.4352	12.8902	12.0956	12.3399	12.4215	0.162463	0.322351	no
0.775749	2.2819	0.300597	0.0052252	LLGL1		Lethal(2) giant larvae protein homolog 1	Q15334	12.4519	11.7499	12.9101	12.5476	13.3605	13.1701	12.9933	13.2386	0.307618	0.315379	no
-0.145253	2.23288	0.25927	0.00584947	LUC7L3		Luc7-like protein 3	O95232	14.7126	14.7174	14.8209	14.7265	14.6129	14.5801	14.6087	14.5947	0.0362079	0.0598134	no
0.139753	2.21648	0.250418	0.00607465	PIP4K2C		Phosphatidylinositol 5-phosphate 4-kinase type-2 gamma	Q8TBX8	14.1816	14.1874	14.2285	14.2186	14.3466	14.3009	14.3808	14.3469	0.0159766	0.0549834	no
-0.455615	2.18972	0.237096	0.00646073	HECTD3		E3 ubiquitin-protein ligase HECTD3	Q5T447	13.6195	13.3507	13.0252	13.4614	12.7316	13.0836	12.8134	13.0057	0.16725	0.22165	no
0.20593	2.18843	0.237096	0.00647987	PMPCA		Mitochondrial-processing peptidase subunit alpha	Q10713	13.5774	13.6158	13.5017	13.672	13.739	13.9171	13.7711	13.7634	0.0493184	0.0913596	no
0.357771	2.17863	0.234467	0.00662787	OSBPL3		Oxysterol-binding protein-related protein 3	Q9H4L5	11.9416	11.7969	12.0148	11.8226	12.5238	12.2139	12.1648	12.1044	0.0712874	0.172571	no
-0.605487	2.14065	0.203549	0.00723359	SPAG5		Sperm-associated antigen 5	Q96R06	12.6487	12.7411	12.8111	12.9805	11.9758	12.7062	11.8179	12.2595	0.0988614	0.267841	no
0.711716	2.12095	0.190804	0.00756917	ARHGAP1		Rho GTPase-activating protein 1	Q07960	14.126	14.0349	14.2855	14.5972	14.3583	14.9559	15.3185	15.2577	0.178409	0.360242	no
0.652531	2.10206	0.178749	0.00790573	RPS6KC1		Ribosomal protein S6 kinase delta-1	Q96S38	9.1807	9.66376	9.91757	9.80292	10.366	10.5712	10.0919	10.146	0.20625	0.284369	yes
-0.68857	2.05304	0.136463	0.00885036	NEBL		Nebulette	O76041	12.6061	12.624	12.6265	12.6497	11.4203	12.5585	12.0743	11.699	0.0124049	0.291065	no
0.172367	2.01791	0.107964	0.00959602	PTK2		Focal adhesion kinase 1	Q05397	14.2598	14.3391	14.3769	14.3756	14.445	14.4414	14.5987	14.5558	0.0375269	0.0781497	yes
0.485005	1.97213	0.0687115	0.0106629	SMYD2		N-lysine methyltransferase SMYD2	Q9NRG4	10.1036	10.268	10.0239	9.81425	10.3151	10.7382	10.7132	10.3833	0.129111	0.224412	no
0.672852	1.94466	0.0512419	0.011359	UNK		RING finger protein unkempt homolog	Q9C0B0	10.3602	10.1167	10.0196	10.0736	10.1858	11.0165	10.8325	11.2266	0.108519	0.349741	no
0.380598	1.94126	0.0512419	0.0114484	TP53BP2		Apoptosis-stimulating of p53 protein 2	Q13625	11.8271	11.8155	11.7306	11.3078	11.9652	11.9995	12.16	12.0786	0.156646	0.168496	no
-1.71757	1.93322	0.0512419	0.0116622	CYTH3;CYTH2		Cytohesin-3;Cytohesin-2	O43739;Q99418	9.25908	9.12834	8.79827	8.30761	8.81124	6.52933	6.81853	6.46395	0.271556	0.641105	no
-0.151767	1.92947	0.0512419	0.0117633	VAT1		Synaptic vesicle membrane protein VAT-1 homolog	Q99536	16.0516	16.1115	16.0368	16.1152	15.938	15.8109	15.9934	15.9656	0.0279926	0.0680231	no
-0.128875	1.91424	0.0420812	0.0121832	ASMTL		Probable bifunctional dTTP/UTP pyrophosphatase/methyltransferase protein	O95671	13.8955	13.9255	13.9545	13.9923	13.8179	13.8078	13.8174	13.8091	0.0286893	0.051795	no
0.181558	1.88957	0.0234006	0.0128954	FTH1		Ferritin heavy chain	P02794	12.5812	12.5173	12.5696	12.5387	12.64	12.7028	12.8324	12.7578	0.020142	0.0794027	no
-1.1056	1.84797	3.13e-09	0.0141916	RAD51D		DNA repair protein RAD51 homolog 4	O75771	10.6235	10.1545	10.4511	10.5201	9.0396	10.3198	8.367	9.60037	0.133276	0.436188	no
-0.469008	1.84551	3.13e-09	0.0142721	PARP12		Protein mono-ADP-ribosyltransferase PARP12	Q9H0J9	13.2615	12.6686	13.0157	12.9649	12.6686	12.13	12.7315	12.5046	0.166367	0.233549	no
-0.494829	1.84015	3.13e-09	0.0144494	SNX18		Sorting nexin-18	Q96RF0	10.8446	10.5395	10.9236	10.6067	10.5895	10.1204	10.304	9.92122	0.127628	0.229733	no
0.206377	1.83917	3.13e-09	0.0144822	RPRD1A		Regulation of nuclear pre-mRNA domain-containing protein 1A	Q96P16	12.0615	12.0496	12.225	12.1021	12.3922	12.3524	12.2205	12.2987	0.0567576	0.0910205	no
0.232065	1.83283	3.13e-09	0.0146952	MAPK9		Mitogen-activated protein kinase 9	P45984	12.8009	12.8709	12.9696	12.9304	13.0729	12.9761	13.1479	13.3031	0.0506807	0.114988	yes
-0.166059	1.83152	3.13e-09	0.0147396	CERT1		Ceramide transfer protein	Q9Y5P4	14.5464	14.521	14.6011	14.6463	14.4354	14.4619	14.281	14.4724	0.0390182	0.0763196	no
0.651202	1.82027	3.13e-09	0.0151262	MAP11		Microtubule-associated protein 11	Q8WVR3	8.4367	8.28262	8.38188	8.26124	8.94749	9.36161	8.94778	8.71036	0.0576548	0.291287	no
0.190282	1.80108	3.13e-09	0.0158094	GMPPB		Mannose-1-phosphate guanyltransferase beta	Q9Y5P6	13.0997	12.9972	13.0232	12.9404	13.2035	13.1176	13.3418	13.1586	0.0460605	0.0902132	no
-0.199224	1.80046	3.13e-09	0.0158322	KYAT1		Kynurenine--oxoglutarate transaminase 1	Q16773	13.4474	13.4785	13.3672	13.4656	13.1418	13.2179	13.1861	13.4159	0.0341556	0.0928776	no
0.217735	1.79367	3.13e-09	0.0160818	GSTP1		Glutathione S-transferase P	P09211	19.1199	19.2918	19.2944	19.0632	19.572	19.3488	19.3707	19.3486	0.0818005	0.109147	no
1.11129	1.79176	3.13e-09	0.0161524	LIMK1		LIM domain kinase 1	P53667	7.03042	7.81479	8.38602	7.94625	9.66778	8.54573	8.71758	8.69155	0.357231	0.555845	yes
-0.327295	1.7901	3.13e-09	0.0162145	NKIRAS2		NF-kappa-B inhibitor-interacting Ras-like protein 2	Q9NYR9	11.0703	10.937	11.1229	10.9918	10.5734	10.9583	10.5927	10.6884	0.0570413	0.146029	no
1.30533	1.78645	3.13e-09	0.0163511	PALM		Paralemmin-1	O75781	7.29542	7.44614	7.27285	6.44203	8.71633	9.25439	7.61019	8.09688	0.269164	0.671624	no
-0.27724	1.77055	3.13e-09	0.0169611	NFKB1		Nuclear factor NF-kappa-B p105 subunit	P19838	12.4535	12.6944	12.7474	12.5249	12.1424	12.3251	12.3509	12.493	0.0956854	0.136335	no
-0.213564	1.76058	3.13e-09	0.017355	LMAN2		Vesicular integral-membrane protein VIP36	Q12907	12.5213	12.3646	12.3328	12.5303	12.1226	12.3171	12.2471	12.208	0.071287	0.0998247	no
0.289073	1.75966	3.13e-09	0.0173917	MAP4K5		Mitogen-activated protein kinase kinase kinase kinase 5	Q9Y4K4	10.7883	10.7785	10.843	10.7757	10.9939	11.3169	11.0416	10.9893	0.0220916	0.137016	yes
0.436218	1.73628	3.13e-09	0.0183534	RXRA		Retinoic acid receptor RXR-alpha	P19793	9.75163	10.0578	10.2525	10.2591	10.5158	10.7177	10.3061	10.5263	0.156406	0.200342	no
-0.228162	1.73457	3.13e-09	0.018426	SELENOH		Selenoprotein H	Q8IZQ5	12.0992	12.0726	12.1181	12.2895	11.8323	11.8719	11.8965	12.0661	0.0701178	0.107311	no
0.530954	1.72876	3.13e-09	0.0186741	NUDT14		Uridine diphosphate glucose pyrophosphatase NUDT14	O95848	9.29147	9.03149	9.4168	9.17016	10.1628	9.5156	9.65946	9.69591	0.113863	0.264015	no
-0.294737	1.72606	3.13e-09	0.0187906	ZGPAT		Zinc finger CCCH-type with G patch domain-containing protein	Q8N5A5	10.7113	10.7399	10.5858	10.8019	10.4683	10.4387	10.2595	10.4935	0.0620069	0.124635	no
0.414934	1.71293	3.13e-09	0.0193672	ASXL2		Putative Polycomb group protein ASXL2	Q76L83	9.56229	9.42775	9.882	9.57025	10.0403	10.0472	10.1473	9.86727	0.138891	0.179443	no
-0.189345	1.70753	3.13e-09	0.0196096	EPB41L2		Band 4.1-like protein 2	O43491	13.934	13.6492	13.8762	13.7717	13.6147	13.5693	13.6049	13.6847	0.0856484	0.0953371	no
-0.113105	1.70491	3.13e-09	0.0197284	PPP4C		Serine/threonine-protein phosphatase 4 catalytic subunit	P60510	15.8531	15.8812	15.9158	15.9066	15.7558	15.7499	15.8561	15.7425	0.0194253	0.049783	no
0.657255	1.69368	3.13e-09	0.0202451	EAF1		ELL-associated factor 1	Q96JC9	9.75713	9.87949	9.15808	9.28483	10.0289	10.7123	10.0296	9.93771	0.240821	0.349549	no
0.550564	1.64337	3.13e-09	0.0227315	CUSTOS		Protein CUSTOS	Q96C57	10.3973	10.7803	10.9563	10.3666	11.5712	10.9966	11.35	10.7849	0.202454	0.298733	no
-0.280303	1.64041	3.13e-09	0.0228873	SNX30		Sorting nexin-30	Q5VWJ9	12.6201	12.6276	12.4851	12.4138	12.1913	12.4619	12.3532	12.0191	0.0721102	0.137863	no
0.60272	1.62761	3.13e-09	0.0235718	ASB1		Ankyrin repeat and SOCS box protein 1	Q9Y576	8.7179	9.02114	8.8604	8.68041	8.95207	9.79176	9.33587	9.61104	0.109501	0.304659	no
-0.478017	1.62616	3.13e-09	0.0236507	PMS1		PMS1 protein homolog 1	P54277	10.7452	10.6334	10.2986	10.802	9.71268	10.3218	10.2057	10.327	0.147013	0.228956	no
-0.370471	1.62015	3.13e-09	0.0239798	SH3GL3		Endophilin-A3	Q99963	10.388	10.0834	10.0641	10.2585	9.72786	9.97761	9.67606	9.93067	0.10789	0.168693	no
-0.484568	1.61984	3.13e-09	0.023997	VPS13C		Vacuolar protein sorting-associated protein 13C	Q709C8	12.0799	12.0743	12.6689	12.7695	11.7174	12.0797	11.7785	12.0788	0.255505	0.280852	no
0.792274	1.61886	3.13e-09	0.0240513	ZFPL1		Zinc finger protein-like 1	O95159	8.89598	9.00197	9.2551	8.18088	10.0757	9.62444	9.74145	9.06145	0.284047	0.38911	no
-0.256856	1.61281	3.13e-09	0.0243885	PRKCD		Protein kinase C delta type	Q05655	12.4792	12.2701	12.5351	12.2585	12.1578	11.9553	12.2853	12.117	0.0986199	0.130747	yes
0.165474	1.60776	3.13e-09	0.0246741	TTK		Dual specificity protein kinase TTK	P33981	12.7747	12.8005	12.8669	12.8753	12.9917	13.1196	12.899	12.969	0.0342229	0.079228	yes
0.1856	1.60705	3.13e-09	0.0247145	PRKCA		Protein kinase C alpha type	P17252	12.9405	13.0149	12.8787	12.9788	13.2631	13.2104	13.0062	13.0755	0.0401346	0.0933757	yes
0.14368	1.59535	3.13e-09	0.0253894	ASF1B		Histone chaperone ASF1B	Q9NVP2	12.2829	12.3343	12.2832	12.2685	12.399	12.4787	12.4085	12.4574	0.0201734	0.0576825	no
0.763298	1.59102	3.13e-09	0.0256437	TCF20		Transcription factor 20	Q9UGU0	7.87172	8.93668	8.53535	8.07909	8.71776	9.28743	9.28125	9.18959	0.336036	0.340142	no
-0.214594	1.58518	3.13e-09	0.0259911	PRKAR2B		cAMP-dependent protein kinase type II-beta regulatory subunit	P31323	13.0939	13.0583	13.0475	13.2796	12.9339	13.067	12.8501	12.7698	0.0775946	0.110084	yes
0.827682	1.56975	3.13e-09	0.026931	MAML2		Mastermind-like protein 2	Q8IZL2	9.04576	9.03861	9.25375	8.15663	10.1932	9.04299	9.87061	9.69872	0.287965	0.417701	no
-0.206842	1.5609	3.13e-09	0.0274853	VAMP8		Vesicle-associated membrane protein 8	Q9BV40	11.8942	12.1159	11.9704	12.1659	11.8265	11.7887	11.7994	11.9044	0.0869356	0.101342	no
0.310593	1.55565	3.13e-09	0.0278198	NRF1		Nuclear respiratory factor 1	Q16656	13.034	12.9404	13.3434	12.9308	13.6345	13.2115	13.398	13.247	0.141193	0.172987	no
0.464398	1.55132	3.13e-09	0.0280982	CAMK2G		Calcium/calmodulin-dependent protein kinase type II subunit gamma	Q13555	10.2719	10.4504	10.5946	10.498	11.2714	10.4248	11.0784	10.8979	0.0918592	0.259557	yes
-0.452509	1.53107	3.13e-09	0.0294396	CDCA3		Cell division cycle-associated protein 3	Q99618	10.3143	10.5108	10.1108	10.4781	9.85367	9.91117	10.2846	9.5545	0.123026	0.219697	no
1.17918	1.52922	3.13e-09	0.0295653	RASSF5		Ras association domain-containing protein 5	Q8WWW0	9.75573	9.81487	10.2293	7.83765	10.9143	10.4301	10.5116	10.4983	0.511701	0.435186	no
0.323811	1.52781	3.13e-09	0.029661	MPHOSPH10		U3 small nucleolar ribonucleoprotein protein MPP10	O00566	10.9032	11.264	11.2175	10.9019	11.1487	11.4381	11.521	11.474	0.135585	0.163381	no
-0.252635	1.49905	3.13e-09	0.0316918	MPRIP		Myosin phosphatase Rho-interacting protein	Q6WCQ1	12.4591	12.5489	12.5326	12.7839	12.1824	12.3607	12.5395	12.2315	0.101073	0.135503	no
0.476074	1.49562	3.13e-09	0.0319437	MRPL15		39S ribosomal protein L15, mitochondrial	Q9P015	11.5233	11.5263	11.9128	10.9321	12.0775	12.0725	11.9258	11.723	0.265535	0.235059	no
0.151805	1.46292	3.13e-09	0.0344416	DIAPH3		Protein diaphanous homolog 3	Q9NSV4	12.4814	12.5449	12.5039	12.4987	12.5806	12.7523	12.7196	12.5837	0.0187443	0.0722377	no
-0.562963	1.46069	3.13e-09	0.0346186	INO80E		INO80 complex subunit E	Q8NBZ0	11.0207	11.2809	10.7072	11.9004	10.6187	10.8531	10.5265	10.659	0.371077	0.37658	no
0.466223	1.46001	3.13e-09	0.0346728	KIF4A		Chromosome-associated kinesin KIF4A	O95239	12.2666	12.2335	12.2022	11.9551	12.0717	12.6219	13.0857	12.7431	0.0939866	0.286324	no
-0.211469	1.45301	3.13e-09	0.0352365	WAPL		Wings apart-like protein homolog	Q7Z5K2	12.4156	12.5918	12.6562	12.565	12.2533	12.4985	12.4246	12.2063	0.0691598	0.10839	no
-0.468974	1.44173	3.13e-09	0.0361631	MRPL37		39S ribosomal protein L37, mitochondrial	Q9BZE1	12.1073	12.181	12.2339	12.3909	12.1033	11.157	12.0399	11.7369	0.0849006	0.226653	no
0.612046	1.43714	3.13e-09	0.0365481	PRKX		cAMP-dependent protein kinase catalytic subunit PRKX	P51817	8.60934	9.23423	9.26974	9.16442	9.88072	9.63178	9.13258	10.0808	0.192633	0.326731	yes
-0.3065	1.428	3.13e-09	0.0373249	IGF2R		Cation-independent mannose-6-phosphate receptor	P11717	12.872	13.1948	12.7512	13.0824	12.6206	12.8037	12.3972	12.8528	0.138339	0.171364	no
-0.415263	1.42298	3.13e-09	0.0377593	CDK13		Cyclin-dependent kinase 13	Q14004	9.96772	10.0325	9.74647	9.46718	9.28825	9.57956	9.35242	9.33258	0.169655	0.208968	yes
-0.493642	1.41973	3.13e-09	0.0380425	AGPS		Alkyldihydroxyacetonephosphate synthase, peroxisomal	O00116	10.9137	11.0134	10.7316	10.8792	10.0646	10.0204	10.9559	10.5224	0.0799098	0.248031	no
-0.312945	1.41257	3.13e-09	0.0386746	ZCCHC9		Zinc finger CCHC domain-containing protein 9	Q8N567	10.8682	10.9647	10.8479	10.7618	10.3924	10.4908	10.4179	10.8897	0.0578751	0.155559	no
0.32519	1.41104	3.13e-09	0.0388119	MRPL17		39S ribosomal protein L17, mitochondrial	Q9NRX2	11.7014	12.0355	11.7568	11.4373	12.2217	12.1931	11.912	11.9049	0.170463	0.176439	no
0.222551	1.41	3.13e-09	0.0389048	UVRAG		UV radiation resistance-associated gene protein	Q9P2Y5	12.2706	12.5754	12.3886	12.3605	12.7733	12.4353	12.6828	12.594	0.0908162	0.121004	no
0.109496	1.4085	3.13e-09	0.0390387	CSNK2A1		Casein kinase II subunit alpha	P68400	15.7668	15.7445	15.7865	15.8615	15.8633	15.8358	15.9751	15.9232	0.0355763	0.05499	yes
0.158506	1.40486	3.13e-09	0.0393679	UGP2		UTP--glucose-1-phosphate uridylyltransferase	Q16851	16.9281	16.7401	16.7472	16.7728	16.9692	16.7956	17.0544	17.0029	0.0630786	0.0879868	no
-0.210477	1.40136	3.13e-09	0.0396862	SCYL3		Protein-associating with the carboxyl-terminal domain of ezrin	Q8IZE3	13.2501	13.2491	13.0445	13.4539	12.9955	13.1023	12.9382	13.1197	0.115774	0.119641	yes
-0.263694	1.39693	3.13e-09	0.0400929	BTAF1		TATA-binding protein-associated factor 172	O14981	11.7067	12.1312	11.7712	12.006	11.7425	11.7196	11.6018	11.4963	0.138476	0.148192	no
1.15874	1.39666	3.13e-09	0.0401176	ANP32C		Acidic leucine-rich nuclear phosphoprotein 32 family member C	O43423	6.78486	6.34593	6.72732	6.68132	8.16777	7.52547	8.62223	6.85892	0.128508	0.645798	no
-0.785053	1.39576	3.13e-09	0.0402013	CBFA2T2		Protein CBFA2T2	O43439	11.2878	11.3684	11.1677	11.6704	9.57005	11.1984	10.4653	11.1203	0.154583	0.352134	no
0.192607	1.39556	3.13e-09	0.0402195	MOB2		MOB kinase activator 2	Q70IA6	11.9211	11.6946	11.8509	11.9244	11.9517	12.1727	12.0184	12.0186	0.0724869	0.0956401	no
-0.202026	1.39207	3.13e-09	0.0405447	GMPPA		Mannose-1-phosphate guanyltransferase alpha	Q96IJ6	12.8336	12.7924	12.8666	12.8993	12.7371	12.8086	12.4241	12.614	0.0316222	0.102604	no
-0.292779	1.38697	3.13e-09	0.0410231	JUP		Junction plakoglobin	P14923	11.4092	11.2834	11.372	11.7548	11.1464	10.9764	11.3294	11.196	0.151303	0.166042	no
-0.606597	1.38251	3.13e-09	0.0414468	TKTL1		Transketolase-like protein 1	P51854	10.3486	9.61513	10.4374	10.6568	10.1557	9.41104	9.44016	9.6246	0.275781	0.342795	no
-0.291233	1.37969	3.13e-09	0.0417169	RPP38		Ribonuclease P protein subunit p38	P78345	14.8311	14.7421	14.8143	15.3019	14.4427	14.7648	14.6389	14.678	0.191414	0.186286	no
-0.210178	1.37207	3.13e-09	0.0424556	DCP2		m7GpppN-mRNA hydrolase	Q8IU60	12.2232	12.4676	12.3769	12.3099	12.085	12.3282	11.9826	12.141	0.0717419	0.110905	no
0.159059	1.37143	3.13e-09	0.0425175	REXO4		RNA exonuclease 4	Q9GZR2	12.0893	12.2021	12.0149	12.0216	12.1632	12.2677	12.2399	12.2932	0.0612786	0.0745738	no
-0.208014	1.36983	3.13e-09	0.0426746	TTC4		Tetratricopeptide repeat protein 4	O95801	12.856	12.8838	12.7094	12.9105	12.6743	12.7813	12.4023	12.6699	0.0606578	0.108451	no
0.178005	1.36689	3.13e-09	0.0429641	SNAPIN		SNARE-associated protein Snapin	O95295	13.8783	14.0622	14.0372	13.9846	14.2387	13.9645	14.2792	14.192	0.055584	0.0994987	no
0.106368	1.36641	3.13e-09	0.0430123	HMGCS1		Hydroxymethylglutaryl-CoA synthase, cytoplasmic	Q01581	16.6622	16.6899	16.629	16.745	16.8229	16.6913	16.8116	16.8259	0.0341858	0.0539945	no
0.248279	1.36514	3.13e-09	0.0431382	GTSE1		G2 and S phase-expressed protein 1	Q9NYZ3	11.2982	11.382	11.383	11.063	11.6921	11.4113	11.596	11.4198	0.100171	0.128971	no
0.402651	1.35862	3.13e-09	0.0437907	ARMC7		Armadillo repeat-containing protein 7	Q9H6L4	10.9591	10.8419	10.2758	11.021	10.9997	11.0736	11.3646	11.2706	0.211491	0.204533	no
-0.0979852	1.35772	3.13e-09	0.043881	BZW2		Basic leucine zipper and W2 domain-containing protein 2	Q9Y6E2	16.2232	16.1498	16.1393	16.2038	16.0876	16.1555	16.0288	16.0523	0.0283246	0.0476565	no
0.578831	1.35527	3.13e-09	0.04413	GATC		Glutamyl-tRNA(Gln) amidotransferase subunit C, mitochondrial	O43716	10.5638	10.7036	10.9791	10.128	11.5976	10.5583	11.4224	11.1117	0.235992	0.339025	no
2.73574	1.35497	3.13e-09	0.0441604	PNMA8A		Paraneoplastic antigen-like protein 8A	Q86V59	5.99247	7.14081	1.51406	5.80905	8.19029	8.62368	7.74927	6.83612	0.864035	0.827623	no
0.5047	1.35481	3.13e-09	0.0441764	SNRPE		Small nuclear ribonucleoprotein E	P62304	16.4194	16.6565	16.8997	16.0771	17.568	16.6988	17.0184	16.7863	0.236571	0.320875	no
0.128376	1.35309	3.13e-09	0.0443521	MAPKAPK3		MAP kinase-activated protein kinase 3	Q16644	13.0969	13.1125	13.0587	13.0242	13.2469	13.28	13.1663	13.1126	0.027393	0.0623156	yes
-0.151792	1.35095	3.13e-09	0.0445703	RABGGTB		Geranylgeranyl transferase type-2 subunit beta	P53611	13.9801	13.7781	13.6927	13.7624	13.6667	13.5964	13.679	13.664	0.0882353	0.085255	no
-0.298721	1.34613	3.13e-09	0.0450677	WRN		Werner syndrome ATP-dependent helicase	Q14191	12.1323	12.0205	12.3671	11.9311	11.9236	12.0587	11.6042	11.6698	0.134549	0.170388	no
0.650663	1.34449	3.13e-09	0.0452383	PTGES3L		Putative protein PTGES3L	E9PB15	8.09952	7.86683	8.10934	7.40552	8.77949	8.55054	8.52612	8.22772	0.209478	0.283808	no
0.148231	1.34179	3.13e-09	0.0455212	MAP3K4		Mitogen-activated protein kinase kinase kinase 4	Q9Y6R4	12.7401	12.7778	12.6467	12.7942	12.8483	13.0131	12.8072	12.8832	0.0450476	0.0755689	yes
-0.285474	1.34089	3.13e-09	0.0456157	RARS2		Probable arginine--tRNA ligase, mitochondrial	Q5T160	13.3598	12.9046	13.1506	13.1341	12.8056	12.9272	13.0903	12.5842	0.128228	0.163661	no
-0.371783	1.33546	3.13e-09	0.0461887	JUND		Transcription factor jun-D	P17535	12.981	12.9444	12.8638	12.9209	11.9983	12.6639	12.7785	12.7823	0.0339207	0.183291	no
0.204331	1.31967	3.13e-09	0.0478993	ZC3H8		Zinc finger CCCH domain-containing protein 8	Q8N5P1	10.7517	10.8247	10.6782	10.9047	11.0504	11.0338	10.9571	10.9354	0.067427	0.0897558	no
-0.387593	1.31882	3.13e-09	0.0479927	RHOT2		Mitochondrial Rho GTPase 2	Q8IXI1	10.3978	10.0562	10.3656	10.1032	9.68388	9.93782	9.56482	10.1859	0.12139	0.198901	no
-1.83689	1.31025	3.13e-09	0.0489498	MFSD13A		Transmembrane protein 180	Q14CX5	9.90691	10.9939	10.5184	10.6963	10.6651	9.95846	7.34789	6.79649	0.293256	0.625892	no
-0.229245	1.30654	3.13e-09	0.0493697	ATN1		Atrophin-1	P54259	12.2203	12.1108	12.0552	12.3849	11.9339	11.7857	11.9803	12.1543	0.102735	0.12844	no
0.293281	1.30483	3.13e-09	0.0495643	HNRNPAB		Heterogeneous nuclear ribonucleoprotein A/B	Q99729	16.3201	16.4467	16.5612	16.2377	17.0488	16.3906	16.6921	16.6073	0.0989871	0.190816	no
0.280693	1.30173	3.13e-09	0.0499194	CHAMP1		Chromosome alignment-maintaining phosphoprotein 1	Q96JM3	10.9951	10.8745	10.7913	10.5987	11.3591	11.0039	10.9922	11.027	0.113478	0.154813	no
0.573626	1.29898	3.13e-09	0.0502361	UTP18		U3 small nucleolar RNA-associated protein 18 homolog	Q9Y5J1	10.1354	10.1404	10.1993	9.12233	10.7772	10.1732	10.4509	10.4907	0.294786	0.282817	no
-0.157498	1.29813	3.13e-09	0.050335	PHYKPL		5-phosphohydroxy-L-lysine phospho-lyase	Q8IUZ5	15.2927	15.2361	15.16	15.3236	15.1459	14.9483	15.2543	15.0339	0.0493628	0.0878264	no
0.187952	1.29697	3.13e-09	0.0504692	OSBPL6		Oxysterol-binding protein-related protein 6	Q9BZF3	11.1103	11.1506	11.0916	11.2841	11.3883	11.4301	11.3216	11.2485	0.0615809	0.0877195	no
-0.180586	1.29321	3.13e-09	0.0509088	VNN1		Pantetheinase	O95497	12.6385	12.8819	12.7876	12.978	12.6657	12.5678	12.6009	12.7292	0.0990089	0.101767	no
-0.336048	1.28871	3.13e-09	0.0514392	PRKD2		Serine/threonine-protein kinase D2	Q9BZL6	11.5706	11.5411	11.4103	11.5821	11.017	11.6474	10.9279	11.1675	0.0534906	0.18465	yes
0.484402	1.28358	3.13e-09	0.0520504	C19orf54		UPF0692 protein C19orf54	Q5BKX5	11.6317	11.8622	12.3894	11.2443	12.4745	12.019	12.3224	12.2493	0.339827	0.265747	no
0.235458	1.2829	3.13e-09	0.0521318	SCRIB		Protein scribble homolog	Q14160	13.1322	13.2936	13.086	13.0933	13.6209	13.1397	13.5058	13.2804	0.0692178	0.145495	no
0.154624	1.28093	3.13e-09	0.0523685	POLR3F		DNA-directed RNA polymerase III subunit RPC6	Q9H1D9	13.713	13.5581	13.7353	13.6206	13.8441	13.6493	13.9208	13.8313	0.0567431	0.0863453	no
-0.152543	1.28034	3.13e-09	0.0524396	ATPAF2		ATP synthase mitochondrial F1 complex assembly factor 2	Q8N5M1	13.7978	13.7992	13.8312	13.7102	13.5006	13.5924	13.8071	13.628	0.0355369	0.0825955	no
0.219841	1.28005	3.13e-09	0.0524744	IBA57		Putative transferase CAF17, mitochondrial	Q5T440	12.4453	12.552	12.698	12.4585	13.016	12.6939	12.7156	12.6076	0.0825646	0.133064	no
0.265935	1.27363	3.13e-09	0.0532562	RTCA		RNA 3'-terminal phosphate cyclase	O00442	12.5482	12.7584	12.8233	12.5358	13.2429	12.7074	12.9485	12.8307	0.101503	0.166765	no
0.19045	1.27358	3.13e-09	0.0532619	GIGYF2		GRB10-interacting GYF protein 2	Q6Y7W6	13.5938	13.4564	13.3226	13.6109	13.6201	13.877	13.5916	13.6569	0.0915479	0.111114	no
0.344722	1.27137	3.13e-09	0.0535341	SAR1B		GTP-binding protein SAR1b	Q9Y6B6	14.0163	14.2005	13.799	13.4587	14.4716	14.1299	14.2216	14.0303	0.212669	0.199123	no
0.272807	1.26859	3.13e-09	0.0538775	TOE1		Target of EGR1 protein 1	Q96GM8	13.0759	13.1811	13.2653	12.9217	13.7268	13.1551	13.3457	13.3076	0.101028	0.175265	no
0.167504	1.26762	3.13e-09	0.0539977	PIK3CD		Phosphatidylinositol 4,5-bisphosphate 3-kinase catalytic subunit delta isoform	O00329	12.46	12.4674	12.4624	12.2331	12.6236	12.642	12.5715	12.4559	0.0765814	0.0869407	yes
0.160117	1.26249	3.13e-09	0.0546397	RAB5B		Ras-related protein Rab-5B	P61020	12.6355	12.5807	12.6845	12.4087	12.7634	12.6546	12.8055	12.7264	0.0809875	0.0826869	no
-0.098806	1.25789	3.13e-09	0.0552223	PCTP		Phosphatidylcholine transfer protein	Q9UKL6	14.2386	14.2814	14.2888	14.3798	14.205	14.1691	14.2375	14.1818	0.0416496	0.0482456	no
0.195966	1.25348	3.13e-09	0.0557852	TRAPPC2;TRAPPC2B		Trafficking protein particle complex subunit 2;Trafficking protein particle complex subunit 2B	P0DI81;P0DI82	10.8023	10.8222	10.8513	10.6947	11.0387	10.9376	11.0856	10.8926	0.0465048	0.089239	no
0.14893	1.24846	3.13e-09	0.0564345	ADRM1		Proteasomal ubiquitin receptor ADRM1	Q16186	15.3838	15.5035	15.5487	15.3069	15.7231	15.562	15.5607	15.4927	0.0761717	0.0867498	no
0.126775	1.24663	3.13e-09	0.0566728	EIF5A		Eukaryotic translation initiation factor 5A-1	P63241	19.4658	19.5349	19.5922	19.5272	19.716	19.5065	19.7238	19.6809	0.0357802	0.070417	no
-0.190202	1.24535	3.13e-09	0.0568393	PAPLN		Papilin	O95428	17.4615	17.3786	17.3218	17.6179	17.1902	17.07	17.3577	17.4012	0.0910533	0.114031	no
0.174279	1.24529	3.13e-09	0.0568468	STK26		Serine/threonine-protein kinase 26	Q9P289	14.61	14.3147	14.5639	14.5487	14.716	14.805	14.6895	14.5237	0.0879761	0.100584	yes
-0.178794	1.24521	3.13e-09	0.0568573	SCYL1		N-terminal kinase-like protein	Q96KG9	13.785	13.5883	13.6938	13.7317	13.3202	13.7006	13.54	13.5228	0.0569248	0.100227	yes
0.147878	1.24514	3.13e-09	0.0568668	TBK1		Serine/threonine-protein kinase TBK1	Q9UHD2	12.5731	12.6796	12.5813	12.6609	12.7025	12.9302	12.7012	12.7525	0.0377022	0.080567	yes
0.106762	1.24061	3.13e-09	0.0574633	PGK1		Phosphoglycerate kinase 1	P00558	18.9487	18.9329	18.9638	18.8697	19.1395	18.9574	19.0479	18.9975	0.0283514	0.0575677	yes
-0.389358	1.2405	3.13e-09	0.0574775	EEF1AKMT4;EEF1AKMT4-ECE2		EEF1A lysine methyltransferase 4;EEF1AKMT4-ECE2 readthrough transcript protein	P0DPD7;P0DPD8	10.1392	10.3272	9.843	10.1025	9.62125	9.96966	9.90921	9.35435	0.135569	0.2029	no
0.174237	1.23906	3.13e-09	0.0576684	SRRM2		Serine/arginine repetitive matrix protein 2	Q9UQ35	14.7013	14.4513	14.821	14.505	14.8317	14.7343	14.8309	14.7787	0.120004	0.0990026	no
-0.859761	1.23575	3.13e-09	0.0581103	CAMK1		Calcium/calmodulin-dependent protein kinase type 1	Q14012	8.52908	8.28488	8.08807	7.91754	7.71997	8.02019	7.04641	6.59395	0.184534	0.378688	yes
-0.102681	1.23483	3.13e-09	0.0582332	METTL16		RNA N6-adenosine-methyltransferase METTL16	Q86W50	13.8424	13.8257	13.8649	13.8649	13.783	13.6469	13.7779	13.7795	0.013177	0.0480535	no
0.131296	1.22876	3.13e-09	0.0590525	ARFGAP1		ADP-ribosylation factor GTPase-activating protein 1	Q8N6T3	12.5417	12.5643	12.5861	12.6742	12.7782	12.6111	12.7472	12.7549	0.0407487	0.0652664	no
-0.967378	1.22847	3.13e-09	0.0590922	RBBP8		DNA endonuclease RBBP8	Q99708	9.51152	9.50679	8.93469	9.47747	8.87493	8.17366	9.38784	7.12453	0.176386	0.421917	no
-0.264454	1.22665	3.13e-09	0.0593406	ELF1		ETS-related transcription factor Elf-1	P32519	11.0691	11.0372	10.6561	11.0594	10.6457	10.8194	10.5531	10.7458	0.128991	0.144249	no
-1.19239	1.22394	3.13e-09	0.0597116	NIPSNAP3B		Protein NipSnap homolog 3B	Q9BS92	8.57001	9.2464	8.82756	9.37257	9.32796	6.5206	7.26886	8.12954	0.249728	0.541345	no
-0.133114	1.21974	3.13e-09	0.0602915	RPL13A		60S ribosomal protein L13a	P40429	18.481	18.4518	18.3492	18.4603	18.2798	18.4718	18.2479	18.2105	0.0400819	0.0761203	no
0.133964	1.21889	3.13e-09	0.0604103	DDX56		Probable ATP-dependent RNA helicase DDX56	Q9NY93	12.2178	12.2766	12.3612	12.3205	12.4435	12.5169	12.3863	12.3652	0.0424159	0.0650241	no
0.241147	1.21637	3.13e-09	0.0607624	FBXO30		F-box only protein 30	Q8TB52	11.3609	11.4748	11.4369	11.0717	11.7587	11.5853	11.5291	11.4359	0.119916	0.132361	no
-0.162089	1.21546	3.13e-09	0.0608888	PTTG1;PTTG2		Securin;Securin-2	O95997;Q9NZH5	11.9653	11.9294	11.8573	11.7089	11.7511	11.699	11.6985	11.664	0.0768255	0.0824416	no
-0.31312	1.21533	3.13e-09	0.0609071	KRT73		Keratin, type II cytoskeletal 73	Q86Y46	13.9515	13.9843	14.0446	13.5208	13.6732	13.2923	13.4286	13.8545	0.153073	0.189356	no
0.248022	1.21411	3.13e-09	0.0610787	RHOA		Transforming protein RhoA	P61586	16.0731	16.0478	16.1418	15.663	16.4253	16.0918	16.3161	16.0845	0.139492	0.148835	no
-0.380315	1.21351	3.13e-09	0.0611631	ARHGEF10		Rho guanine nucleotide exchange factor 10	O15013	11.0521	11.8581	11.3706	11.6039	10.7849	11.2805	11.1312	11.1669	0.233274	0.240842	no
0.38326	1.21317	3.13e-09	0.0612105	ARVCF		Armadillo repeat protein deleted in velo-cardio-facial syndrome	O00192	10.5233	11.0787	10.6422	10.1711	11.1487	11.0156	10.9266	10.8574	0.264035	0.209738	no
-0.326869	1.20953	3.13e-09	0.0617256	RAPGEF2		Rap guanine nucleotide exchange factor 2	Q9Y4G8	11.6878	11.6333	11.2514	11.528	11.3794	11.087	11.4683	10.8584	0.12827	0.185313	no
0.957365	1.20126	3.13e-09	0.0629123	MT1X		Metallothionein-1X	P80297	6.51981	7.60927	7.68213	7.03852	8.26168	8.56492	7.21225	8.64034	0.345443	0.498937	no
-0.237288	1.19989	3.13e-09	0.0631122	ARHGAP45		Rho GTPase-activating protein 45	Q92619	10.6022	10.5107	10.3782	10.5164	10.3015	10.1053	10.2403	10.4112	0.0633312	0.111201	no
-0.304004	1.19885	3.13e-09	0.0632637	EPSTI1		Epithelial-stromal interaction protein 1	Q96J88	10.2716	10.7042	10.6695	10.9151	10.3941	10.2502	10.396	10.3041	0.177367	0.177399	no
-0.696236	1.19666	3.13e-09	0.063583	KMT2C		Histone-lysine N-methyltransferase 2C	Q8NEZ4	12.4133	11.6493	11.9825	12.1853	10.5251	12.0427	11.8906	10.987	0.218504	0.367313	no
-0.0894353	1.19519	3.13e-09	0.0637977	ETFA		Electron transfer flavoprotein subunit alpha, mitochondrial	P13804	16.6359	16.6111	16.6358	16.6816	16.5887	16.4587	16.6026	16.5566	0.0204854	0.0453197	no
0.341911	1.18884	3.13e-09	0.0647387	CYHR1		Cysteine and histidine-rich protein 1	Q6ZMK1	9.92494	10.0392	10.2741	9.8056	10.675	10.2514	10.3893	10.0958	0.141764	0.198871	no
0.545098	1.18784	3.13e-09	0.0648871	APOE		Apolipoprotein E	P02649	9.57775	9.61336	8.88929	9.50099	10.239	9.9993	9.28835	10.2351	0.209269	0.315313	no
-0.820523	1.18716	3.13e-09	0.0649892	GPATCH2		G patch domain-containing protein 2	Q9NW75	10.0973	11.9549	10.486	10.4043	10.2689	10.2693	9.4298	9.69232	0.68509	0.701122	no
0.476663	1.18701	3.13e-09	0.0650114	IFT46		Intraflagellar transport protein 46 homolog	Q9NQC8	8.53028	8.94911	9.01394	9.1221	9.31885	9.84382	9.07344	9.28597	0.166869	0.273828	no
0.217514	1.18206	3.13e-09	0.0657571	MLF2		Myeloid leukemia factor 2	Q15773	11.2052	11.1015	11.2685	10.8476	11.3274	11.3458	11.2584	11.3612	0.123176	0.109849	no
1.29726	1.17907	3.13e-09	0.0662102	DTNBP1		Dysbindin	Q96EV8	15.0176	14.9595	15.0215	14.9425	17.6942	14.9293	17.5041	15.0025	0.0278449	1.04742	no
0.122957	1.17495	3.13e-09	0.0668422	SPC25		Kinetochore protein Spc25	Q9HBM1	14.702	14.6939	14.85	14.6509	14.9668	14.8045	14.8268	14.7905	0.0616018	0.0714409	no
0.279794	1.17332	3.13e-09	0.0670928	CHTF8		Chromosome transmission fidelity protein 8 homolog	P0CG13	10.1358	10.3848	10.3987	10.4914	10.5009	10.7124	10.444	10.8725	0.101497	0.156605	no
0.535236	1.17121	3.13e-09	0.0674196	STARD7		StAR-related lipid transfer protein 7, mitochondrial	Q9NQZ5	9.56669	9.80184	9.86854	8.79964	10.4371	9.94079	10.0216	9.77809	0.292058	0.289064	no
-0.104571	1.16919	3.13e-09	0.0677347	EEF1G		Elongation factor 1-gamma	P26641	18.5019	18.5316	18.4978	18.578	18.4427	18.5114	18.3016	18.4353	0.0258288	0.0564497	no
0.152262	1.16761	3.13e-09	0.0679806	PTK2B		Protein-tyrosine kinase 2-beta	Q14289	12.9868	12.8272	13.0726	12.8123	12.9713	13.1298	13.1081	13.0988	0.0881269	0.0846704	yes
0.218456	1.16696	3.13e-09	0.0680838	ZYG11B		Protein zyg-11 homolog B	Q9C0D3	11.576	11.2786	11.6296	11.4946	11.8165	11.5007	11.7694	11.766	0.10325	0.121816	no
-0.344944	1.16631	3.13e-09	0.0681847	SMG7		Protein SMG7	Q92540	11.4277	11.6556	11.41	11.3247	11.121	11.5758	10.9887	10.7527	0.101255	0.2016	no
-1.75433	1.16519	3.13e-09	0.0683609	CD5L		CD5 antigen-like	O43866	7.85972	7.37167	8.32776	8.75475	5.36596	8.60798	4.53178	6.79086	0.400811	0.72564	no
0.0732575	1.16378	3.13e-09	0.0685834	ECHS1		Enoyl-CoA hydratase, mitochondrial	P30084	15.844	15.8155	15.8563	15.8397	15.9128	15.9028	15.9603	15.8727	0.0117998	0.03297	no
-0.475764	1.16367	3.13e-09	0.0686006	RALA		Ras-related protein Ral-A	P11233	12.232	12.1138	11.8293	12.6001	11.1323	12.0768	11.6086	12.0544	0.22518	0.285646	no
0.617801	1.16264	3.13e-09	0.0687644	CD3EAP		DNA-directed RNA polymerase I subunit RPA34	O15446	12.1358	12.1452	12.4166	10.9594	12.9796	12.3064	12.5389	12.3034	0.361431	0.333348	no
-0.503875	1.16185	3.13e-09	0.0688883	C1orf52		UPF0690 protein C1orf52	Q8N6N3	11.6516	11.7131	11.5018	11.8705	10.6434	11.6163	11.7049	10.7569	0.105893	0.273161	no
0.2062	1.1597	3.13e-09	0.0692305	MED7		Mediator of RNA polymerase II transcription subunit 7	O43513	10.4741	10.4787	10.3982	10.383	10.7969	10.5805	10.5457	10.6356	0.034604	0.0973997	no
-0.4664	1.15693	3.13e-09	0.0696744	TAF6		Transcription initiation factor TFIID subunit 6	P49848	12.8388	12.5489	12.1662	12.541	12.102	11.4035	12.2211	12.5027	0.186755	0.26721	no
0.148959	1.15388	3.13e-09	0.0701642	ATL3		Atlastin-3	Q6DD88	11.7924	11.9172	11.9209	11.8219	12.1334	12.0137	11.9934	11.9076	0.0454583	0.0767441	no
-0.170948	1.15355	3.13e-09	0.0702186	DHX40		Probable ATP-dependent RNA helicase DHX40	Q8IX18	11.3616	11.6043	11.4691	11.5736	11.3459	11.4177	11.2674	11.2939	0.0752673	0.0873763	no
-0.567807	1.15349	3.13e-09	0.0702276	MIS12		Protein MIS12 homolog	Q9H081	11.3002	11.1386	11.0975	12.0552	10.3364	11.3222	10.5087	11.1531	0.348292	0.382449	no
0.145357	1.15217	3.13e-09	0.0704411	DYRK1A		Dual specificity tyrosine-phosphorylation-regulated kinase 1A	Q13627	13.3625	13.3225	13.2747	13.3826	13.2897	13.5249	13.6051	13.5041	0.0328448	0.0857175	yes
0.418818	1.15217	3.13e-09	0.0704411	UBALD1		UBA-like domain-containing protein 1	Q8TB05	10.6039	10.6455	10.2545	9.84352	10.5068	10.5612	10.9305	11.0242	0.241059	0.241309	no
0.444605	1.15093	3.13e-09	0.0706424	RBM33		RNA-binding protein 33	Q96EV2	13.8913	13.1959	13.1201	13.0091	14.0068	13.7459	13.2698	13.9724	0.307729	0.283718	no
0.119909	1.14936	3.13e-09	0.0708988	RBM8A		RNA-binding protein 8A	Q9Y5S9	14.7727	14.8029	14.9203	14.7338	14.9979	14.8031	14.9697	14.9386	0.0567254	0.0695062	no
0.814861	1.14813	3.13e-09	0.0710995	BRCA1		Breast cancer type 1 susceptibility protein	P38398	8.15319	7.09764	7.08337	6.71141	8.12577	8.39608	7.97687	7.80634	0.48831	0.384238	no
-0.125287	1.14802	3.13e-09	0.0711173	CAPN7		Calpain-7	Q9Y6W3	13.8965	13.994	13.8629	13.9033	13.859	13.8454	13.6345	13.8166	0.0394072	0.0687823	no
-1.10403	1.14701	3.13e-09	0.0712829	ZBTB1		Zinc finger and BTB domain-containing protein 1	Q9Y2K1	9.00228	9.14269	8.64271	9.25712	9.20482	8.57521	6.56109	7.28757	0.174724	0.476735	no
-0.279714	1.14315	3.13e-09	0.0719193	RSRC1		Serine/Arginine-related protein 53	Q96IZ7	10.2025	10.1339	10.1935	10.0279	9.74621	9.64495	9.97492	10.0728	0.0547282	0.134745	no
-0.434779	1.14197	3.13e-09	0.0721153	RASIP1		Ras-interacting protein 1	Q5U651	10.3204	10.764	10.0363	10.7876	10.2096	9.97086	9.66084	10.3278	0.241814	0.268374	no
0.285047	1.1403	3.13e-09	0.0723928	B2M		Beta-2-microglobulin	P61769	11.4855	11.4088	11.1416	11.0172	11.4609	11.2947	11.7567	11.6809	0.151253	0.171999	no
0.326598	1.13858	3.13e-09	0.0726816	TRNAU1AP		tRNA selenocysteine 1-associated protein 1	Q9NX07	10.0967	9.64175	10.3224	10.1347	10.4446	10.4365	10.4271	10.1937	0.18711	0.168637	no
0.790291	1.13612	3.13e-09	0.0730945	IFT81		Intraflagellar transport protein 81 homolog	Q8WYA0	7.56213	6.90973	7.09314	6.42869	7.63409	8.0675	7.72738	7.72589	0.322147	0.332551	no
-0.360488	1.135	3.13e-09	0.073283	CDC42BPA		Serine/threonine-protein kinase MRCK alpha	Q5VT25	12.4344	12.4662	12.0613	12.6852	12.0639	12.2287	11.5864	12.3261	0.172343	0.217215	yes
0.282591	1.13475	3.13e-09	0.0733243	TOP2A		DNA topoisomerase 2-alpha	P11388	14.0345	13.8936	13.33	13.9257	14.0549	14.1178	14.1807	13.9607	0.197589	0.158897	no
0.126309	1.13182	3.13e-09	0.0738218	PDE6D		Retinal rod rhodopsin-sensitive cGMP 3',5'-cyclic phosphodiesterase subunit delta	O43924	12.1022	12.037	12.175	12.2034	12.2521	12.2065	12.3002	12.264	0.051567	0.0593871	no
-0.136434	1.12977	3.13e-09	0.0741708	NFIC		Nuclear factor 1 C-type	P08651	12.3774	12.3628	12.2706	12.4792	12.2283	12.2679	12.3037	12.1443	0.0593569	0.0713559	no
0.290247	1.12807	3.13e-09	0.0744615	SNRNP27		U4/U6.U5 small nuclear ribonucleoprotein 27 kDa protein	Q8WVK2	13.2981	13.1246	13.4116	12.755	13.5952	13.3502	13.5786	13.2262	0.187614	0.175027	no
-0.108079	1.12489	3.13e-09	0.0750077	FUCA2		Plasma alpha-L-fucosidase	Q9BTY2	13.0492	13.0088	12.9581	13.103	12.8646	12.907	12.9651	12.95	0.0426017	0.0532981	no
0.258685	1.12453	3.13e-09	0.0750707	ACADSB		Short/branched chain specific acyl-CoA dehydrogenase, mitochondrial	P45954	12.4338	12.6031	12.5515	12.1877	13.0428	12.6112	12.5953	12.5616	0.123059	0.171882	no
-0.364683	1.12356	3.13e-09	0.0752389	ALKBH2		DNA oxidative demethylase ALKBH2	Q6NS38	10.2054	10.3258	10.7214	10.1184	9.72994	10.3383	9.87181	9.97234	0.196079	0.225272	no
-1.54193	1.12355	3.13e-09	0.0752401	HLA-A		HLA class I histocompatibility antigen, A alpha chain	P04439	11.6194	8.69273	8.12123	8.25172	7.41553	6.72885	7.85654	8.51641	1.35946	1.63039	no
-0.239974	1.12331	3.13e-09	0.0752814	NOL10		Nucleolar protein 10	Q9BSC4	11.7379	11.8545	11.6422	11.9004	11.2335	11.6458	11.7558	11.54	0.0800225	0.136049	no
0.81344	1.12224	3.13e-09	0.075468	AURKB		Aurora kinase B	Q96GD4	7.39814	8.25144	8.84197	8.80216	9.40708	9.53126	8.26775	9.34138	0.396244	0.436241	yes
-1.55062	1.12193	3.13e-09	0.0755221	PRR3		Proline-rich protein 3	P79522	10.5277	10.649	10.0504	10.2554	10.487	10.3579	7.30283	7.1323	0.183249	0.552413	no
-0.349275	1.12115	3.13e-09	0.0756564	POLR3D		DNA-directed RNA polymerase III subunit RPC4	P05423	12.8845	12.3737	12.8232	12.9701	12.1957	12.5803	12.1092	12.7693	0.169912	0.217118	no
-0.214079	1.11745	3.13e-09	0.076305	MOB3B		MOB kinase activator 3B	Q86TA1	10.7112	10.7481	10.6947	10.7615	10.3185	10.6043	10.6765	10.4597	0.0215799	0.102406	no
0.37368	1.11659	3.13e-09	0.0764552	MIB1		E3 ubiquitin-protein ligase MIB1	Q86YT6	9.54777	9.83533	9.40002	9.6517	10.4088	10.0082	9.69586	9.81672	0.127738	0.233702	no
0.764536	1.11648	3.13e-09	0.0764753	COMMD2		COMM domain-containing protein 2	Q86X83	11.3947	11.9202	11.9909	10.8808	13.4547	11.8064	12.0865	11.8971	0.328836	0.644447	no
0.27053	1.1132	3.13e-09	0.0770548	AMBRA1		Activating molecule in BECN1-regulated autophagy protein 1	Q9C0C7	9.72857	10.0307	10.1001	10.2478	10.3134	10.3591	10.2237	10.293	0.145665	0.132215	no
0.231617	1.11295	3.13e-09	0.0770996	HPCAL1		Hippocalcin-like protein 1	P37235	12.5324	12.6444	12.5422	12.1768	12.9215	12.5371	12.7091	12.6545	0.13347	0.141648	no
-0.370663	1.11177	3.13e-09	0.0773082	SUPV3L1		ATP-dependent RNA helicase SUPV3L1, mitochondrial	Q8IYB8	13.8013	13.8991	13.7652	14.0987	13.9059	13.2656	13.8486	13.0616	0.106851	0.21886	no
-0.0893634	1.11141	3.13e-09	0.0773724	FAM207A		Protein FAM207A	Q9NSI2	14.4767	14.4726	14.4744	14.5721	14.402	14.3623	14.3961	14.4778	0.034389	0.0458624	no
-0.344734	1.1094	3.13e-09	0.0777328	CFAP410		Cilia- and flagella-associated protein 410	O43822	10.563	10.5916	10.5076	10.6825	9.97687	10.7447	10.2365	10.0078	0.0510862	0.196753	no
-0.201293	1.10872	3.13e-09	0.0778535	ACAD8		Isobutyryl-CoA dehydrogenase, mitochondrial	Q9UKU7	11.7391	11.8151	11.5032	11.8852	11.6407	11.6143	11.4623	11.42	0.110785	0.117945	no
-0.0724959	1.10789	3.13e-09	0.0780035	RECQL		ATP-dependent DNA helicase Q1	P46063	15.1369	15.1231	15.124	15.1674	15.0859	15.0187	15.067	15.0898	0.0143962	0.0318831	no
-0.224752	1.10294	3.13e-09	0.0788961	RECQL5		ATP-dependent DNA helicase Q5	O94762	12.4053	12.4611	12.2558	12.5877	12.0053	12.3557	12.0426	12.4072	0.0947551	0.136122	no
0.155805	1.10085	3.13e-09	0.0792766	CREBBP		CREB-binding protein	Q92793	12.4747	12.4871	12.5412	12.3818	12.8066	12.5456	12.6611	12.4947	0.0454493	0.0939801	no
0.284144	1.09951	3.13e-09	0.0795223	GATA1		Erythroid transcription factor	P15976	12.7115	12.3695	12.4401	11.9703	12.7587	12.4865	12.7583	12.6246	0.205124	0.168597	no
0.25063	1.09918	3.13e-09	0.0795823	FSIP2		Fibrous sheath-interacting protein 2	Q5CZC0	11.1452	11.553	11.7083	11.28	11.6267	11.8096	11.6234	11.6294	0.1768	0.145101	no
0.504809	1.09844	3.13e-09	0.0797177	HDHD2		Haloacid dehalogenase-like hydrolase domain-containing protein 2	Q9H0R4	11.7048	12.0251	11.8278	11.4084	12.969	11.6179	12.2564	12.1419	0.174514	0.387288	no
-0.151548	1.096	3.13e-09	0.0801671	GTPBP2		GTP-binding protein 2	Q9BX10	13.6433	13.5802	13.3487	13.4551	13.3972	13.4639	13.3023	13.2577	0.0901952	0.0933242	no
0.102321	1.09532	3.13e-09	0.0802929	NIP7		60S ribosome subunit biogenesis protein NIP7 homolog	Q9Y221	13.2066	13.2208	13.327	13.2201	13.4013	13.3819	13.2938	13.3067	0.039494	0.0518693	no
-1.02559	1.09503	3.13e-09	0.0803479	PRPS1L1		Ribose-phosphate pyrophosphokinase 3	P21108	10.6361	9.58444	10.3963	10.8257	7.65597	9.95368	9.95922	9.7714	0.326605	0.472487	no
0.139144	1.09471	3.13e-09	0.0804069	MRPS31		28S ribosomal protein S31, mitochondrial	Q92665	12.708	12.826	12.8008	12.6307	13.0166	12.8898	12.8067	12.809	0.0615252	0.0802044	no
-0.426762	1.09453	3.13e-09	0.0804394	BCKDK		[3-methyl-2-oxobutanoate dehydrogenase [lipoamide]] kinase, mitochondrial	O14874	9.65621	9.77768	9.60408	9.96365	8.87688	9.83715	9.37366	9.20688	0.11341	0.232012	yes
0.107374	1.09269	3.13e-09	0.0807812	MAP1B		Microtubule-associated protein 1B	P46821	14.0649	14.1031	14.2005	14.1744	14.3129	14.1301	14.2709	14.2586	0.0433261	0.0605582	no
0.357566	1.0907	3.13e-09	0.0811519	NUDT15		Nucleotide triphosphate diphosphatase NUDT15	Q9NV35	9.69907	9.68376	9.28581	9.99461	10.0166	9.7492	10.1926	10.1351	0.196155	0.195415	no
0.229736	1.08864	3.13e-09	0.081538	RNF14		E3 ubiquitin-protein ligase RNF14	Q9UBS8	11.4928	11.4277	11.6679	11.337	11.9341	11.4512	11.6863	11.7727	0.0987673	0.143094	no
0.160324	1.08808	3.13e-09	0.0816429	PWP2		Periodic tryptophan protein 2 homolog	Q15269	13.2313	13.1665	13.5093	13.1687	13.5119	13.3662	13.4104	13.4287	0.118631	0.097606	no
-0.227169	1.08645	3.13e-09	0.0819495	NDUFA5		NADH dehydrogenase [ubiquinone] 1 alpha subcomplex subunit 5	Q16718	10.6427	10.5586	10.4286	10.7469	10.3144	10.5335	10.3822	10.238	0.0926989	0.119259	no
-0.587359	1.08542	3.13e-09	0.082144	TRIP11		Thyroid receptor-interacting protein 11	Q15643	12.2615	11.6884	12.2173	11.2594	11.1844	10.9394	10.8929	12.0605	0.307347	0.388232	no
0.102634	1.0851	3.13e-09	0.0822055	DIS3L2		DIS3-like exonuclease 2	Q8IYB7	12.8991	12.9473	12.8983	12.8948	13.0417	13.0538	13.0406	12.914	0.0174846	0.0501219	no
0.203424	1.0838	3.13e-09	0.0824521	AAGAB		Alpha- and gamma-adaptin-binding protein p34	Q6PD74	13.5672	13.2297	13.6683	13.657	13.9008	13.6223	13.7014	13.7114	0.133583	0.124026	no
-0.127782	1.0783	3.13e-09	0.0835016	NIFK		MKI67 FHA domain-interacting nucleolar phosphoprotein	Q9BYG3	13.6263	13.6517	13.6136	13.6876	13.5644	13.6326	13.5304	13.3406	0.0227038	0.0716379	no
0.366056	1.07708	3.13e-09	0.0837383	DHX8		ATP-dependent RNA helicase DHX8	Q14562	12.882	13.1986	12.9843	12.2021	13.1335	13.0312	13.3377	13.2288	0.265833	0.206636	no
0.325932	1.07459	3.13e-09	0.0842181	PPP1R11		E3 ubiquitin-protein ligase PPP1R11	O60927	11.857	11.9051	11.8632	11.4032	11.9535	11.758	12.4831	12.1376	0.15086	0.221263	no
-0.425219	1.07453	3.13e-09	0.0842302	FBXO44		F-box only protein 44	Q9H4M3	9.15436	9.14059	9.51948	9.67891	8.8563	9.31288	9.00017	8.62311	0.187575	0.2384	no
0.118398	1.07399	3.13e-09	0.0843348	NME4		Nucleoside diphosphate kinase, mitochondrial	O00746	12.7975	12.7943	12.9603	12.8973	13.0705	12.9816	12.9265	12.9443	0.0564402	0.0640337	no
2.33458	1.07352	3.13e-09	0.0844263	SH3BP5		SH3 domain-binding protein 5	O60239	7.99289	3.30145	8.27391	3.70484	7.86803	7.22985	8.98614	8.52738	1.07552	0.741167	no
1.11269	1.07121	3.13e-09	0.0848766	WDR20		WD repeat-containing protein 20	Q8TBZ3	7.64944	10.1842	10.0963	8.26098	10.7008	9.49859	10.2135	10.2289	0.734693	0.526144	no
-0.250395	1.07077	3.13e-09	0.0849628	TDP1		Tyrosyl-DNA phosphodiesterase 1	Q9NUW8	10.6768	10.5361	10.5176	10.9631	10.3515	10.5954	10.3525	10.3925	0.149289	0.151401	no
-0.182819	1.06999	3.13e-09	0.0851162	VPS35		Vacuolar protein sorting-associated protein 35	Q96QK1	16.2962	16.3034	16.1872	16.5192	15.9253	16.0953	16.2583	16.2959	0.0988665	0.118973	no
0.441672	1.06944	3.13e-09	0.0852239	TPD52L2		Tumor protein D54	O43399	16.5264	16.6167	16.8127	15.8991	17.3835	16.479	17.0348	16.7244	0.246081	0.297077	no
0.585543	1.0667	3.13e-09	0.0857621	MCM10		Protein MCM10 homolog	Q7L590	8.95693	8.90399	8.63262	7.90892	9.75214	8.90875	8.93233	9.15141	0.290229	0.349343	no
0.148084	1.06565	3.13e-09	0.0859715	HSPA4L		Heat shock 70 kDa protein 4L	O95757	16.3364	16.2418	16.3952	16.0563	16.4656	16.4818	16.3864	16.2882	0.099927	0.0919431	no
-0.167951	1.06409	3.13e-09	0.0862807	LBR		Delta(14)-sterol reductase LBR	Q14739	12.5105	12.3435	12.4394	12.653	12.2148	12.2257	12.3757	12.4585	0.091264	0.102488	no
-0.26184	1.06343	3.13e-09	0.0864111	CENPV		Centromere protein V	Q7Z7K6	10.8045	10.7858	10.886	11.095	10.7088	10.8246	10.2976	10.693	0.101636	0.148234	no
-0.255946	1.06255	3.13e-09	0.0865866	LENG8		Leukocyte receptor cluster member 8	Q96PV6	9.95175	9.88909	10.1466	9.91078	9.6155	9.63215	9.8952	9.73161	0.0843321	0.124401	no
0.114667	1.0623	3.13e-09	0.0866358	ACTR1B		Beta-centractin	P42025	15.5289	15.5554	15.5743	15.4162	15.7605	15.595	15.6573	15.5206	0.0481137	0.071316	no
0.214037	1.06011	3.13e-09	0.0870744	MAP4K4		Mitogen-activated protein kinase kinase kinase kinase 4	O95819	11.3327	11.3059	11.4835	11.2223	11.8098	11.5828	11.3623	11.4456	0.0767384	0.135878	yes
-0.158062	1.05731	3.13e-09	0.0876381	ARHGAP6		Rho GTPase-activating protein 6	O43182	12.2193	12.0507	11.9418	12.1152	11.9076	12.0643	11.8457	11.8772	0.0804913	0.0915664	no
0.775125	1.0554	3.13e-09	0.0880232	UTP3		Something about silencing protein 10	Q9NQZ2	9.48272	10.0386	9.93833	8.03306	10.0477	9.92071	10.4546	10.1702	0.475308	0.355773	no
-0.797222	1.05376	3.13e-09	0.0883564	ANKRD16		Ankyrin repeat domain-containing protein 16	Q6P6B7	9.2141	9.341	9.35615	9.90634	7.96159	9.92851	8.08545	8.65314	0.232117	0.469239	no
0.266767	1.05077	3.13e-09	0.0889673	VPS37A		Vacuolar protein sorting-associated protein 37A	Q8NEZ2	12.0571	12.036	12.2701	11.8381	12.6204	12.177	12.4433	12.0276	0.122843	0.182091	no
-0.168705	1.05014	3.13e-09	0.089096	TRIM24		Transcription intermediary factor 1-alpha	O15164	13.0833	12.781	13.0074	13.133	12.8791	12.9504	12.7052	12.7952	0.103771	0.106093	no
0.0983075	1.04833	3.13e-09	0.0894676	RPLP1		60S acidic ribosomal protein P1	P05386	17.2296	17.1087	17.2517	17.075	17.3298	17.2791	17.2397	17.2095	0.0605031	0.0579361	no
-0.139219	1.04605	3.13e-09	0.0899395	OGT		UDP-N-acetylglucosamine--peptide N-acetylglucosaminyltransferase 110 kDa subunit	O15294	13.1481	13.0669	13.1381	13.1744	13.0082	13.1783	12.9263	12.8578	0.0315081	0.0817558	no
0.228627	1.04548	3.13e-09	0.0900573	RALGPS2		Ras-specific guanine nucleotide-releasing factor RalGPS2	Q86X27	11.25	11.4856	10.9637	11.3597	11.6245	11.4129	11.5429	11.3933	0.148435	0.132467	no
0.167188	1.04209	3.13e-09	0.0907623	FBXL18		F-box/LRR-repeat protein 18	Q96ME1	11.8002	11.7307	11.8281	11.7369	12.074	11.723	12.0409	11.9268	0.0332428	0.0997376	no
0.489421	1.03864	3.13e-09	0.0914861	ING3		Inhibitor of growth protein 3	Q9NXR8	9.77064	10.4283	10.2933	9.35354	10.8682	10.4715	10.3675	10.0962	0.32221	0.299104	no
0.114473	1.03826	3.13e-09	0.0915663	MARS2		Methionine--tRNA ligase, mitochondrial	Q96GW9	12.2471	12.1254	12.2767	12.2859	12.3312	12.3291	12.3961	12.3365	0.0502257	0.0547077	no
-0.752369	1.03691	3.13e-09	0.0918519	URB2		Unhealthy ribosome biogenesis protein 2 homolog	Q14146	10.8166	11.1096	10.8202	9.51736	10.7302	9.70848	9.39358	9.42205	0.386382	0.484684	no
0.392576	1.03465	3.13e-09	0.0923318	SEC24D		Protein transport protein Sec24D	O94855	11.306	11.3108	11.6989	10.8356	12.1505	11.3713	11.6708	11.529	0.23927	0.270716	no
0.864258	1.03457	3.13e-09	0.0923478	KDM2B		Lysine-specific demethylase 2B	Q8NHM5	9.33646	8.78994	8.71213	10.4082	10.9224	10.3103	10.3546	9.11644	0.613823	0.558566	no
0.336753	1.02773	3.13e-09	0.0938152	MCM3AP		Germinal-center associated nuclear protein	O60318	10.1943	10.533	10.7973	10.0913	10.4551	10.9201	10.695	10.8928	0.227835	0.206213	no
-0.320575	1.02561	3.13e-09	0.0942732	FNBP1L		Formin-binding protein 1-like	Q5T0N5	9.75892	10.0656	9.70899	9.78677	9.13713	9.60943	9.69442	9.59703	0.116399	0.170788	no
0.114133	1.0246	3.13e-09	0.0944933	CDKN2AIP		CDKN2A-interacting protein	Q9NXV6	12.995	13.0991	13.0439	13.0268	13.2866	13.0507	13.1521	13.132	0.0303797	0.0663535	no
0.296426	1.02364	3.13e-09	0.0947027	SRPRA		Signal recognition particle receptor subunit alpha	P08240	10.402	10.3574	10.1867	9.77823	10.5363	10.6077	10.4753	10.2907	0.18263	0.163607	no
0.106187	1.02328	3.13e-09	0.09478	ZC3HAV1		Zinc finger CCCH-type antiviral protein 1	Q7Z2W4	14.1914	14.2291	14.146	14.0219	14.3047	14.254	14.1692	14.2852	0.061268	0.0614554	no
0.299925	1.02298	3.13e-09	0.0948462	TK2		Thymidine kinase 2, mitochondrial	O00142	9.10288	9.0967	9.16128	9.11581	9.50982	9.44642	9.56201	9.15812	0.0203909	0.142943	no
-0.128325	1.02165	3.13e-09	0.0951373	ARHGEF7		Rho guanine nucleotide exchange factor 7	Q14155	12.1295	12.1843	12.2244	12.1761	12.0306	12.1895	11.9517	12.0292	0.0269365	0.0668671	no
-0.116682	1.01881	3.13e-09	0.0957623	ACP1		Low molecular weight phosphotyrosine protein phosphatase	P24666	17.1937	17.1882	17.1738	17.2759	17.1866	17.1038	16.9097	17.1648	0.0324188	0.0710904	no
-0.234333	1.01874	3.13e-09	0.0957773	SMARCA1		Probable global transcription activator SNF2L1	P28370	10.6785	10.9264	10.6204	10.8323	10.804	10.4073	10.4364	10.4726	0.097563	0.136584	no
-0.216206	1.0184	3.13e-09	0.0958511	BPTF		Nucleosome-remodeling factor subunit BPTF	Q12830	11.6122	11.1918	11.3648	11.4215	11.0607	11.4072	11.102	11.1556	0.120515	0.135273	no
0.371558	1.01836	3.13e-09	0.095861	KANSL2		KAT8 regulatory NSL complex subunit 2	Q9H9L4	8.73325	9.32524	8.72626	8.94131	9.32359	9.3716	9.43078	9.08632	0.206443	0.191659	no
0.279663	1.01823	3.13e-09	0.0958889	OCIAD1		OCIA domain-containing protein 1	Q9NX40	11.2659	11.2008	11.2468	11.0919	11.5755	11.0636	11.838	11.447	0.0530392	0.1952	no
0.288144	1.01546	3.13e-09	0.0965028	FAHD2A		Fumarylacetoacetate hydrolase domain-containing protein 2A	Q96GK7	14.261	14.2615	14.5141	13.9788	14.9431	14.307	14.6016	14.3162	0.150344	0.211607	no
-0.45443	1.01372	3.13e-09	0.0968893	PSMB9		Proteasome subunit beta type-9	P28065	15.5031	15.1051	15.2158	15.7035	14.1308	15.2161	15.1879	15.1749	0.19032	0.267156	no
0.377137	1.01267	3.13e-09	0.0971237	RPS23		40S ribosomal protein S23	P62266	15.344	15.303	15.658	14.8512	16.1353	15.6477	15.6403	15.2414	0.221885	0.269616	no
0.222368	1.01164	3.13e-09	0.0973564	SRP9		Signal recognition particle 9 kDa protein	P49458	16.9253	16.9369	17.1136	16.6748	17.4331	16.9616	17.1726	16.9727	0.122686	0.158491	no
0.211415	1.01162	3.13e-09	0.0973604	KRI1		Protein KRI1 homolog	Q8N9T8	11.6313	11.578	11.4116	11.534	11.4976	12.0243	11.691	11.7877	0.0638436	0.140925	no
-0.143854	1.01117	3.13e-09	0.0974607	HAUS1		HAUS augmin-like complex subunit 1	Q96CS2	12.3884	12.4713	12.4776	12.5874	12.3195	12.5154	12.2453	12.269	0.0569943	0.08531	no
0.135329	1.01001	3.13e-09	0.0977217	CXorf38		Uncharacterized protein CXorf38	Q8TB03	12.467	12.4674	12.5154	12.2754	12.6695	12.4919	12.5975	12.5075	0.0713779	0.077648	no
0.117407	1.00937	3.13e-09	0.0978652	IRAK1		Interleukin-1 receptor-associated kinase 1	P51617	12.579	12.442	12.5835	12.4021	12.6687	12.6182	12.6262	12.5632	0.0644933	0.0623831	yes
0.181316	1.00722	3.13e-09	0.098351	MEA1		Male-enhanced antigen 1	Q16626	13.26	13.1927	13.3627	13.024	13.5321	13.1973	13.5291	13.3064	0.0970071	0.120271	no
0.192637	1.00575	3.13e-09	0.0986849	G6PD		Glucose-6-phosphate 1-dehydrogenase	P11413	17.845	17.9453	17.9983	17.659	18.3194	17.8544	18.0438	18.0007	0.100694	0.136003	no
0.213215	1.00555	3.13e-09	0.0987309	CREB1		Cyclic AMP-responsive element-binding protein 1	P16220	11.8849	11.9302	11.9905	11.7171	12.344	11.8096	12.0742	12.1477	0.0792803	0.142509	no
0.233767	1.00372	3.13e-09	0.0991472	GPATCH11		G patch domain-containing protein 11	Q8N954	12.6916	12.6523	12.7739	12.2043	12.8785	12.6394	12.9605	12.7789	0.163253	0.144739	no
-0.0815734	1.00358	3.13e-09	0.0991797	CEP170		Centrosomal protein of 170 kDa	Q5SW79	13.8039	13.7462	13.7444	13.815	13.7461	13.6563	13.6723	13.7085	0.025894	0.0391062	no
0.0857176	1.0019	3.13e-09	0.0995634	TIMM44		Mitochondrial import inner membrane translocase subunit TIM44	O43615	15.2165	15.2155	15.182	15.2899	15.3243	15.2261	15.3928	15.3036	0.0318702	0.0495743	no
0.220226	1.00107	3.13e-09	0.0997544	ARF4		ADP-ribosylation factor 4	P18085	13.0756	13.2809	13.0156	12.6699	13.3616	13.2444	13.0998	13.2172	0.169659	0.138629	no
0.417968	0.999594	3.13e-09	0.100093	TXNRD3		Thioredoxin reductase 3	Q86VQ6	9.65393	10.1178	9.11866	9.51983	10.0741	9.97446	9.70731	10.3262	0.288753	0.254234	no
-0.131597	0.997919	3.13e-09	0.10048	MED16		Mediator of RNA polymerase II transcription subunit 16	Q9Y2X0	11.7904	11.7581	11.7926	11.7983	11.578	11.7956	11.6412	11.5982	0.0125145	0.0654179	no
-0.343177	0.997625	3.13e-09	0.100548	DHX35		Probable ATP-dependent RNA helicase DHX35	Q9H5Z1	9.32449	9.88898	9.92274	9.5983	9.25611	9.58128	9.15395	9.37046	0.186264	0.203325	no
0.400393	0.997569	3.13e-09	0.100561	HELQ		Helicase POLQ-like	Q8TDG4	12.7891	12.4059	13.1556	13.392	12.9281	13.5994	13.5295	13.2872	0.287623	0.259837	no
0.363036	0.996372	3.13e-09	0.100839	LYPLAL1		Lysophospholipase-like protein 1	Q5VWZ2	13.5092	13.5718	13.9343	13.0413	14.2995	13.6364	13.9104	13.6623	0.246922	0.254139	no
0.0710197	0.995841	3.13e-09	0.100962	PSMD14		26S proteasome non-ATPase regulatory subunit 14	O00487	16.4653	16.4548	16.4455	16.4155	16.5848	16.5241	16.5008	16.4555	0.0148033	0.0377423	no
-0.0864159	0.995161	3.13e-09	0.101121	PPM1B		Protein phosphatase 1B	O75688	13.2116	13.2064	13.1194	13.2344	13.1237	13.098	13.1018	13.1026	0.0344995	0.040087	no
-0.2676	0.994175	3.13e-09	0.10135	CIC		Protein capicua homolog	Q96RK0	11.095	11.4924	11.5418	11.588	10.9819	11.1636	11.4807	11.0207	0.145417	0.173547	no
-0.152865	0.992883	3.13e-09	0.101652	RALY		RNA-binding protein Raly	Q9UKM9	11.9084	12.0949	12.1045	12.2732	11.8994	12.0044	11.9536	11.9121	0.102826	0.0942387	no
-0.0826435	0.991272	3.13e-09	0.10203	POLR2H		DNA-directed RNA polymerases I, II, and III subunit RPABC3	P52434	14.042	14.0528	13.9843	14.0816	13.978	13.9752	13.8832	13.9938	0.0280929	0.042014	no
-0.267386	0.990118	3.13e-09	0.102302	ATG7		Ubiquitin-like modifier-activating enzyme ATG7	O95352	12.4143	12.42	12.1395	12.525	12.037	12.4087	12.2555	11.728	0.109596	0.169329	no
0.205906	0.990041	3.13e-09	0.10232	HSP90AA4P		Putative heat shock protein HSP 90-alpha A4	Q58FG1	15.0447	14.997	15.1952	14.8003	15.4706	15.0667	15.3029	15.0207	0.111588	0.14644	no
-0.110594	0.987964	3.13e-09	0.10281	NQO1		NAD(P)H dehydrogenase [quinone] 1	P15559	13.5822	13.4691	13.3416	13.4854	13.3401	13.4311	13.3578	13.3069	0.0679825	0.0663726	no
0.682388	0.985759	3.13e-09	0.103334	DNAJB2		DnaJ homolog subfamily B member 2	P25686	8.08817	7.94258	9.26841	8.03259	8.87037	9.39825	8.35804	9.43464	0.5117	0.433558	no
-1.4528	0.985699	3.13e-09	0.103348	POLG		DNA polymerase subunit gamma-1	P54098	8.53268	8.28128	7.82385	7.13135	7.06517	4.61929	5.81591	8.4576	0.38311	0.660424	no
-0.214921	0.985543	3.13e-09	0.103385	HEXIM2		Protein HEXIM2	Q96MH2	10.8632	10.9946	11.0903	11.0967	10.8352	10.5199	10.8552	10.9748	0.074066	0.121341	no
0.114363	0.984162	3.13e-09	0.103714	PPP4R3A		Serine/threonine-protein phosphatase 4 regulatory subunit 3A	Q6IN85	14.5836	14.7003	14.6682	14.6219	14.845	14.5917	14.8476	14.7473	0.0354977	0.0737701	no
-0.191667	0.984119	3.13e-09	0.103724	MLH1		DNA mismatch repair protein Mlh1	P40692	12.8371	12.958	12.8697	12.8668	12.8466	12.6811	12.3711	12.866	0.036682	0.116389	no
-0.259943	0.983906	3.13e-09	0.103775	DDX43		Probable ATP-dependent RNA helicase DDX43	Q9NXZ2	16.4235	16.2563	16.1695	16.7177	15.7651	16.2744	16.22	16.2678	0.17389	0.182505	no
-0.217383	0.982512	3.13e-09	0.104109	MED12		Mediator of RNA polymerase II transcription subunit 12	Q93074	10.648	10.7126	10.8981	10.7596	10.4974	10.6852	10.2928	10.6734	0.0747378	0.120453	no
0.252932	0.982396	3.13e-09	0.104137	RABL6		Rab-like protein 6	Q3YEC7	14.8936	14.9428	15.0663	14.5995	15.4634	14.8574	15.218	14.9753	0.131464	0.184108	no
0.435811	0.982353	3.13e-09	0.104147	KDM4A		Lysine-specific demethylase 4A	O75164	9.32103	9.7379	10.4959	9.8656	10.5373	10.4203	10.0703	10.1357	0.352347	0.271011	no
0.178359	0.982353	3.13e-09	0.104147	KYNU		Kynureninase	Q16719	13.5565	13.6409	13.7001	13.4101	13.9206	13.572	13.9064	13.622	0.0855692	0.123006	no
0.245772	0.981574	3.13e-09	0.104334	GMNN		Geminin	O75496	13.8864	14.0519	14.0836	13.6848	14.4413	13.8284	14.3017	14.1182	0.122932	0.173769	no
0.113887	0.98154	3.13e-09	0.104342	HK1		Hexokinase-1	P19367	15.0148	14.9884	15.0003	14.9246	15.2589	15.129	14.9813	15.0143	0.0272721	0.0763585	no
-0.142076	0.98151	3.13e-09	0.104349	TATDN3		Putative deoxyribonuclease TATDN3	Q17R31	11.6166	11.771	11.7232	11.8686	11.6875	11.6112	11.5901	11.5223	0.0724308	0.078564	no
0.258136	0.980238	3.13e-09	0.104656	NOB1		RNA-binding protein NOB1	Q9ULX3	13.4946	13.7479	13.6967	13.3298	14.2405	13.7074	13.7085	13.645	0.130625	0.196371	no
-0.129698	0.980131	3.13e-09	0.104681	TBC1D14		TBC1 domain family member 14	Q9P2M4	11.5214	11.6095	11.5703	11.5867	11.3775	11.4284	11.411	11.5522	0.02575	0.0609301	no
0.217664	0.978474	3.13e-09	0.105081	ELL		RNA polymerase II elongation factor ELL	P55199	11.3385	11.3488	11.3109	10.9681	11.5496	11.5599	11.2088	11.5188	0.118874	0.132471	no
-0.29983	0.97789	3.13e-09	0.105223	POP5		Ribonuclease P/MRP protein subunit POP5	Q969H6	11.1667	11.6936	11.5532	11.5248	10.8638	10.9934	11.4419	11.4398	0.147329	0.192847	no
0.312737	0.975001	3.13e-09	0.105925	CGGBP1		CGG triplet repeat-binding protein 1	Q9UFW8	11.1026	11.1598	11.3881	10.9844	11.9544	11.094	11.4101	11.4274	0.12044	0.237589	no
-0.376497	0.974504	3.13e-09	0.106046	FAHD2B		Fumarylacetoacetate hydrolase domain-containing protein 2B	Q6P2I3	11.1278	11.4115	11.5436	11.3097	10.9513	11.0753	10.3826	11.4775	0.120037	0.230006	no
0.296672	0.973509	3.13e-09	0.10629	VPS11		Vacuolar protein sorting-associated protein 11 homolog	Q9H270	11.9724	12.3741	12.1738	11.7317	12.5273	12.4797	11.9561	12.4755	0.188386	0.197799	no
-0.15476	0.971813	3.13e-09	0.106706	SRSF11		Serine/arginine-rich splicing factor 11	Q05519	15.5664	15.2323	15.512	15.5733	15.3837	15.423	15.2876	15.1707	0.106093	0.105104	no
0.150357	0.971626	3.13e-09	0.106752	CLUH		Clustered mitochondria protein homolog	O75153	14.7253	14.7435	14.8178	14.4995	15.0369	14.7597	14.82	14.771	0.0917722	0.102191	no
-0.153152	0.971334	3.13e-09	0.106823	WNK4		Serine/threonine-protein kinase WNK4	Q96J92	11.6986	11.7399	11.5515	11.7475	11.4511	11.6704	11.424	11.5795	0.0614842	0.0862255	yes
-0.401276	0.971319	3.13e-09	0.106827	MANBA		Beta-mannosidase	O00462	15.4365	15.1137	15.1868	15.7403	14.273	15.2507	15.1785	15.17	0.203409	0.255412	no
0.0982279	0.971311	3.13e-09	0.106829	SNRPA1		U2 small nuclear ribonucleoprotein A'	P09661	16.7817	16.7755	16.8346	16.7014	16.9426	16.7499	16.9564	16.8372	0.0377656	0.0629743	no
0.160258	0.9696	3.13e-09	0.107251	LTBP4		Latent-transforming growth factor beta-binding protein 4	Q8N2S1	11.1811	11.2258	11.4035	11.3865	11.3863	11.3615	11.5542	11.5358	0.0775406	0.0897518	no
0.896763	0.966457	3.13e-09	0.10803	SGK3		Serine/threonine-protein kinase Sgk3	Q96BR1	6.85842	7.28596	6.72807	5.5245	7.30706	7.55064	7.38011	7.74619	0.428843	0.367462	yes
-0.131582	0.965134	3.13e-09	0.108359	BSG		Basigin	P35613	11.8256	11.9498	11.7733	11.9231	11.8107	11.6296	11.7591	11.746	0.0570551	0.0704993	no
0.417607	0.964486	3.13e-09	0.108521	HSD17B8		Estradiol 17-beta-dehydrogenase 8	Q92506	12.8061	12.8591	13.0264	11.9418	13.4702	12.8418	13.1062	12.8855	0.286302	0.26581	no
0.65361	0.964478	3.13e-09	0.108523	TAF1C		TATA box-binding protein-associated factor RNA polymerase I subunit C	Q15572	7.38744	8.70312	8.65526	8.09845	8.85901	9.46459	8.76523	8.36987	0.373321	0.394767	no
0.19639	0.964413	3.13e-09	0.108539	AMPD3		AMP deaminase 3	Q01432	10.8763	10.862	11.1506	10.7918	11.2842	11.0545	10.9939	11.1337	0.114378	0.117713	no
-0.297874	0.964085	3.13e-09	0.108621	PGK2		Phosphoglycerate kinase 2	P07205	13.3456	13.1499	13.107	13.7809	12.6954	13.0584	13.1605	13.2776	0.228233	0.22247	yes
-0.164317	0.963724	3.13e-09	0.108712	CFL2		Cofilin-2	Q9Y281	11.2875	11.2071	11.4266	11.4036	11.2553	11.1189	11.0298	11.2636	0.0705637	0.0913316	no
-0.590325	0.962863	3.13e-09	0.108927	MCM9		DNA helicase MCM9	Q9NXL9	10.2762	10.6906	10.6841	10.2173	10.3106	10.0367	8.79609	10.3635	0.175432	0.309917	no
-0.162746	0.962655	3.13e-09	0.10898	PLK1		Serine/threonine-protein kinase PLK1	P53350	12.0317	11.9137	11.9997	11.9434	11.9227	11.9813	11.6999	11.6337	0.0370104	0.095855	yes
-0.337867	0.962022	3.13e-09	0.109139	NOC3L		Nucleolar complex protein 3 homolog	Q8WTT2	12.6487	12.6662	12.346	12.9404	11.802	12.6145	12.243	12.5903	0.166998	0.220638	no
0.149841	0.961949	3.13e-09	0.109157	NDUFA8		NADH dehydrogenase [ubiquinone] 1 alpha subcomplex subunit 8	P51970	11.4096	11.5002	11.5477	11.5673	11.7043	11.7977	11.5133	11.6089	0.0480091	0.0865107	no
0.119213	0.961565	3.13e-09	0.109253	PAF1		RNA polymerase II-associated factor 1 homolog	Q8N7H5	15.8966	16.0497	16.0678	15.8315	16.2136	16.036	16.0341	16.0388	0.0797224	0.0791902	no
0.101151	0.960968	3.13e-09	0.109404	TCOF1		Treacle protein	Q13428	15.6637	15.6432	15.7309	15.5934	15.8653	15.6425	15.8182	15.7097	0.0396573	0.0658084	no
-0.204986	0.960209	3.13e-09	0.109595	MAP1A		Microtubule-associated protein 1A	P78559	13.9831	14.0044	13.8597	13.9256	13.3489	13.8487	13.8895	13.8657	0.0445812	0.126261	no
-0.127738	0.95828	3.13e-09	0.110083	CDC26		Anaphase-promoting complex subunit CDC26	Q8NHZ8	13.8999	13.9453	13.9302	13.9461	13.8064	13.8727	13.9381	13.5936	0.0148865	0.0780328	no
-0.126596	0.958049	3.13e-09	0.110142	ZMYM3		Zinc finger MYM-type protein 3	Q14202	12.0611	12.1155	12.0648	12.1742	12.0925	11.8491	11.9631	12.0045	0.037088	0.0683615	no
0.155178	0.957635	3.13e-09	0.110247	LEO1		RNA polymerase-associated protein LEO1	Q8WVC0	12.8184	12.9261	12.873	12.9015	13.2119	12.7849	13.0936	13.0493	0.0318873	0.104708	no
0.126619	0.95721	3.13e-09	0.110354	PRMT7		Protein arginine N-methyltransferase 7	Q9NVM4	11.9064	11.8808	11.8491	11.8815	12.0598	12.0945	12.0185	11.8515	0.0162522	0.0696883	no
0.217739	0.956247	3.13e-09	0.110599	APOC1		Apolipoprotein C-I	P02654	10.4863	10.6492	10.1971	10.3736	10.6932	10.7457	10.5192	10.6191	0.131281	0.121122	no
-0.253056	0.95459	3.13e-09	0.111022	SORBS1		Sorbin and SH3 domain-containing protein 1	Q9BX66	12.5786	12.6428	12.7065	12.52	12.4609	12.4438	11.8954	12.6356	0.0558696	0.154031	no
0.0961266	0.954308	3.13e-09	0.111094	CNOT1		CCR4-NOT transcription complex subunit 1	A5YKK6	15.4313	15.3527	15.486	15.3465	15.5802	15.5313	15.5079	15.3815	0.0466297	0.0606255	no
-0.26087	0.953175	3.13e-09	0.111385	ZBTB33		Transcriptional regulator Kaiso	Q86T24	10.0185	10.0803	9.79787	10.1552	9.69971	9.54642	9.98797	9.7742	0.103086	0.142879	no
0.126249	0.952672	3.13e-09	0.111514	UTP14A		U3 small nucleolar RNA-associated protein 14 homolog A	Q9BVJ6	12.3645	12.3552	12.4305	12.505	12.5718	12.4078	12.6667	12.514	0.0486336	0.0761214	no
0.566296	0.95227	3.13e-09	0.111617	PRKAB2		5'-AMP-activated protein kinase subunit beta-2	O43741	10.0641	9.53015	10.1748	9.02652	10.0859	10.4489	10.8768	9.64924	0.33798	0.390913	yes
-0.182622	0.95223	3.13e-09	0.111627	SIAE		Sialate O-acetylesterase	Q9HAT2	11.6208	11.6242	11.7285	11.9454	11.37	11.6514	11.5023	11.6645	0.109382	0.117434	no
0.182883	0.948696	3.13e-09	0.112539	NEK7		Serine/threonine-protein kinase Nek7	Q8TDX7	12.026	11.842	12.1154	11.7011	12.1627	12.2148	12.0832	11.9553	0.127248	0.115243	yes
0.184549	0.948598	3.13e-09	0.112565	RPL23		60S ribosomal protein L23	P62829	16.7442	16.7242	16.8156	16.448	17.0888	16.912	16.829	16.6404	0.106743	0.130712	no
0.200389	0.9481	3.13e-09	0.112694	TNIP1		TNFAIP3-interacting protein 1	Q15025	11.5525	11.6168	11.6155	11.2366	11.8654	11.5588	11.5961	11.8026	0.118495	0.126324	no
0.174783	0.948019	3.13e-09	0.112715	CSTF2		Cleavage stimulation factor subunit 2	P33240	15.2918	15.3467	15.5059	15.2966	15.7784	15.3241	15.6327	15.4049	0.0714637	0.129487	no
-0.12738	0.947574	3.13e-09	0.11283	SLC1A5		Neutral amino acid transporter B(0)	Q15758	12.2056	12.315	12.2854	12.4247	12.2263	12.2692	12.0721	12.1536	0.0632943	0.0740911	no
-0.23362	0.946979	3.13e-09	0.112985	RHOXF2B;RHOXF2		Rhox homeobox family member 2B;Rhox homeobox family member 2	P0C7M4;Q9BQY4	11.805	11.9917	12.1706	11.863	11.6062	11.9175	11.433	11.9392	0.114791	0.15378	no
0.282041	0.946893	3.13e-09	0.113007	DRG2		Developmentally-regulated GTP-binding protein 2	P55039	15.7204	15.6619	15.8604	15.161	16.1096	15.8351	16.0177	15.5694	0.193727	0.190735	no
0.136795	0.94653	3.13e-09	0.113102	H1-2		Histone H1.2	P16403	19.8414	19.9487	19.9165	19.7545	20.2087	19.8623	19.9635	19.9738	0.0592918	0.0961988	no
0.13545	0.943027	3.13e-09	0.114018	E2F4		Transcription factor E2F4	Q16254	11.9494	12.0743	11.9616	12.1852	12.0962	12.2926	12.1686	12.1549	0.0776305	0.0799757	no
-0.530085	0.94247	3.13e-09	0.114164	TANC2		Protein TANC2	Q9HCD6	9.2813	8.84196	8.3074	8.49105	8.07383	8.7259	8.0132	7.98844	0.30862	0.343587	no
0.1626	0.941163	3.13e-09	0.114508	CPSF7		Cleavage and polyadenylation specificity factor subunit 7	Q8N684	14.8738	14.9643	14.9881	14.5758	15.138	14.9043	15.0296	14.9805	0.124263	0.107165	no
1.51425	0.940583	3.13e-09	0.114661	MRPS18C		28S ribosomal protein S18c, mitochondrial	Q9Y3D5	11.3769	11.682	12.3631	7.78723	13.0413	12.2259	12.2928	11.7062	0.727818	0.577736	no
-0.439026	0.94	3.13e-09	0.114815	PDE4DIP		Myomegalin	Q5VU43	15.2332	14.885	14.9228	15.3421	13.8038	14.9399	14.9591	14.9242	0.157231	0.255767	no
-0.257594	0.93871	3.13e-09	0.115157	ORC4		Origin recognition complex subunit 4	O43929	13.2387	13.3598	12.955	13.7139	13.0893	13.2477	12.8941	13.0061	0.221031	0.198679	no
-0.0811047	0.935909	3.13e-09	0.115902	EIF2B2		Translation initiation factor eIF-2B subunit beta	P49770	13.7809	13.8246	13.8021	13.7725	13.7797	13.7329	13.6334	13.7097	0.0161824	0.0414582	no
-0.385344	0.935489	3.13e-09	0.116014	SIPA1		Signal-induced proliferation-associated protein 1	Q96FS4	12.0821	12.0401	11.8149	12.3012	11.4491	12.1962	11.9405	11.1111	0.137789	0.247571	no
2.1078	0.934143	3.13e-09	0.116374	GOLGB1		Golgin subfamily B member 1	Q14789	6.29646	8.02036	8.27033	2.26606	7.50131	9.05085	8.61938	8.11285	0.88741	0.660811	no
0.511311	0.933073	3.13e-09	0.116661	HDAC5		Histone deacetylase 5	Q9UQL6	8.90241	10.0695	9.85788	9.21777	10.4921	9.83223	10.1518	9.61669	0.36245	0.334287	no
0.184207	0.932653	3.13e-09	0.116774	DDX6		Probable ATP-dependent RNA helicase DDX6	P26196	16.3408	16.4845	16.4914	16.2014	16.8733	16.4271	16.4935	16.4609	0.0934041	0.140674	no
0.0739946	0.931705	3.13e-09	0.117029	PRPF40A		Pre-mRNA-processing factor 40 homolog A	O75400	14.811	14.8614	14.8434	14.8243	14.8598	14.9903	14.9216	14.8644	0.0152913	0.0410758	no
1.03401	0.931347	3.13e-09	0.117126	IKZF3		Zinc finger protein Aiolos	Q9UKT9	9.35281	7.15655	9.88628	8.86251	8.6718	10.1781	10.1085	10.4358	0.610626	0.550737	no
-0.500811	0.931223	3.13e-09	0.117159	LRP1		Prolow-density lipoprotein receptor-related protein 1	Q07954	10.7306	10.6431	10.6528	10.7858	9.28758	10.7346	10.1105	10.6765	0.0471604	0.27069	no
0.132351	0.929992	3.13e-09	0.117492	RPL22		60S ribosomal protein L22	P35268	17.9238	17.9196	17.9661	17.6928	18.1774	17.9442	17.9981	17.912	0.0823198	0.091598	no
-0.132423	0.929925	3.13e-09	0.11751	TRAPPC12		Trafficking protein particle complex subunit 12	Q8WVT3	12.9258	13.0175	12.7046	12.8682	12.68	12.8274	12.7937	12.6852	0.0895632	0.0856799	no
0.141114	0.929622	3.13e-09	0.117592	PGM2L1		Glucose 1,6-bisphosphate synthase	Q6PCE3	15.0341	15.133	14.8689	15.2246	15.2857	15.0561	15.2456	15.2376	0.103709	0.0948853	no
0.233476	0.929152	3.13e-09	0.117719	DSG2		Desmoglein-2	Q14126	9.72027	9.95304	9.89763	9.8533	9.94834	9.92997	10.2123	10.2675	0.0675813	0.129785	no
-0.469802	0.926123	3.13e-09	0.118543	MRPS11		28S ribosomal protein S11, mitochondrial	P82912	10.6908	10.2724	10.1445	10.4083	10.2456	10.2731	9.05678	10.0613	0.167393	0.267665	no
-0.424811	0.925702	3.13e-09	0.118658	PDSS2		Decaprenyl-diphosphate synthase subunit 2	Q86YH6	9.96466	9.57477	9.72134	9.74054	8.81717	9.51255	9.04956	9.92279	0.113675	0.254115	no
0.304214	0.923226	3.13e-09	0.119337	PAK1		Serine/threonine-protein kinase PAK 1	Q13153	10.0252	10.1535	9.5926	9.95995	10.3176	9.97256	10.561	10.097	0.157349	0.197143	yes
0.0869224	0.922762	3.13e-09	0.119464	KNL1		Kinetochore scaffold 1	Q8NG31	14.3352	14.4282	14.4249	14.3941	14.4392	14.4033	14.5063	14.5812	0.0295429	0.0527235	no
-0.107375	0.922477	3.13e-09	0.119543	FAM91A1		Protein FAM91A1	Q658Y4	12.3905	12.507	12.5642	12.5599	12.4176	12.3503	12.3655	12.4587	0.0549335	0.0589756	no
-0.340957	0.921858	3.13e-09	0.119713	ATP1A2		Sodium/potassium-transporting ATPase subunit alpha-2	P50993	11.173	11.2755	10.9253	11.1815	10.6307	11.254	10.2887	11.018	0.099961	0.213736	no
0.230958	0.921577	3.13e-09	0.119791	POP4		Ribonuclease P protein subunit p29	O95707	11.98	12.1211	12.0291	11.7869	12.5852	11.9757	12.2108	12.0692	0.0952923	0.175716	no
1.06314	0.9213	3.13e-09	0.119867	SPIN1		Spindlin-1	Q9Y657	6.8435	6.14744	7.58632	6.0595	8.40482	8.40915	6.28207	7.79328	0.524006	0.644916	no
-0.356648	0.919895	3.13e-09	0.120256	KDM4B		Lysine-specific demethylase 4B	O94953	13.2954	13.2149	13.1189	13.6669	12.3366	13.2914	13.0048	13.2367	0.175806	0.234324	no
-0.132474	0.919123	3.13e-09	0.120469	PTAR1		Protein prenyltransferase alpha subunit repeat-containing protein 1	Q7Z6K3	11.8533	11.9522	11.7898	11.9748	11.6993	11.725	11.7178	11.8981	0.0595407	0.0759199	no
-0.171009	0.918435	3.13e-09	0.12066	SS18		Protein SSXT	Q15532	12.0052	12.1644	11.9889	12.2816	11.9038	11.7523	11.9881	12.1119	0.0975821	0.112425	no
0.319195	0.918366	3.13e-09	0.12068	GABARAPL2		Gamma-aminobutyric acid receptor-associated protein-like 2	P60520	14.6972	14.9285	14.9579	14.5445	15.6381	14.6651	15.1149	14.9868	0.133651	0.262868	no
-0.286349	0.918271	3.13e-09	0.120706	PEX1		Peroxisome biogenesis factor 1	O43933	12.651	12.4881	12.7275	13.1101	12.0667	12.4323	12.5773	12.755	0.191739	0.207354	no
0.105934	0.917615	3.13e-09	0.120889	GATAD2B		Transcriptional repressor p66-beta	Q8WXI9	12.6894	12.6903	12.6788	12.5523	12.8489	12.7776	12.6693	12.7388	0.045471	0.060138	no
-0.239788	0.91687	3.13e-09	0.121096	MTO1		Protein MTO1 homolog, mitochondrial	Q9Y2Z2	11.5385	11.4618	11.3512	11.3656	10.7612	11.3204	11.2831	11.3934	0.0613829	0.143606	no
-0.0898119	0.915768	3.13e-09	0.121404	PRUNE1		Exopolyphosphatase PRUNE1	Q86TP1	13.2726	13.1777	13.184	13.2424	13.1204	13.2178	13.1021	13.0771	0.0319642	0.0481517	no
-0.101714	0.915428	3.13e-09	0.121499	CHAC2		Glutathione-specific gamma-glutamylcyclotransferase 2	Q8WUX2	13.4704	13.2976	13.2777	13.3215	13.2786	13.1535	13.258	13.2702	0.0623123	0.0621494	no
0.220792	0.91498	3.13e-09	0.121624	PSMB1		Proteasome subunit beta type-1	P20618	17.0215	17.1414	17.3099	16.7756	17.5336	17.0509	17.3647	17.1824	0.152665	0.160677	no
-1.0238	0.913376	3.13e-09	0.122074	ZFP36L2		mRNA decay activator protein ZFP36L2	P47974	7.04248	8.61676	8.12002	7.54049	8.20869	6.50478	5.85716	6.6539	0.461999	0.61902	no
0.245013	0.911701	3.13e-09	0.122546	WDFY1		WD repeat and FYVE domain-containing protein 1	Q8IWB7	11.4732	12.0066	12.1118	12.1722	12.281	12.166	12.1069	12.19	0.199597	0.150137	no
0.130388	0.911371	3.13e-09	0.122639	SETD2		Histone-lysine N-methyltransferase SETD2	Q9BYW2	12.6681	12.8007	12.8962	12.9234	13.0907	12.8671	12.96	12.8921	0.0783768	0.0839844	no
-0.132163	0.911004	3.13e-09	0.122743	SYF2		Pre-mRNA-splicing factor SYF2	O95926	12.6321	12.4099	12.4018	12.4787	12.2016	12.375	12.3854	12.4318	0.0759006	0.0831384	no
-0.229826	0.910196	3.13e-09	0.122971	FERMT2		Fermitin family homolog 2	Q96AC1	10.7093	10.8822	10.6906	10.8159	10.4681	10.6182	10.837	10.2553	0.0631206	0.13767	no
-0.334744	0.909715	3.13e-09	0.123108	BORCS8		BLOC-1-related complex subunit 8	Q96FH0	10.4309	10.037	10.5306	10.2577	9.80468	9.56746	10.3283	10.2168	0.146057	0.210238	no
0.134754	0.906731	3.13e-09	0.123956	NSUN2		RNA cytosine C(5)-methyltransferase NSUN2	Q08J23	16.6541	16.7195	16.7867	16.6409	17.0414	16.6485	16.8795	16.7708	0.0468707	0.0998426	no
-0.147081	0.905615	3.13e-09	0.124275	EFHD1		EF-hand domain-containing protein D1	Q9BUP0	11.6056	11.7129	11.5839	11.6378	11.4853	11.3002	11.6261	11.5403	0.0395335	0.0831643	no
-0.30974	0.904798	3.13e-09	0.124509	ERCC8		DNA excision repair protein ERCC-8	Q13216	10.6097	10.7714	10.7974	10.8808	10.8453	10.6775	10.3032	9.99435	0.0770906	0.190682	no
-0.119635	0.904708	3.13e-09	0.124535	WDCP		WD repeat and coiled-coil-containing protein	Q9H6R7	12.7014	12.6762	12.6852	12.8586	12.5379	12.7456	12.5396	12.6196	0.0613702	0.0746637	no
-0.178784	0.904197	3.13e-09	0.124682	CORO2A		Coronin-2A	Q92828	11.9036	11.9417	11.9897	11.6665	11.6293	11.9337	11.5691	11.6543	0.0954257	0.117909	no
-0.116197	0.904017	3.13e-09	0.124734	TPX2		Targeting protein for Xklp2	Q9ULW0	13.37	13.4544	13.4884	13.4771	13.2328	13.216	13.4608	13.4155	0.036578	0.0730625	no
0.197031	0.902856	3.13e-09	0.125067	MTMR2		Myotubularin-related protein 2	Q13614	10.9186	10.5936	11.0002	10.8068	10.8778	10.9688	11.1583	11.1024	0.11862	0.11877	no
0.281046	0.900877	3.13e-09	0.125639	TUBB2B		Tubulin beta-2B chain	Q9BVA1	13.7171	13.8316	13.9096	13.351	14.4197	13.6813	13.947	13.8856	0.160601	0.218966	no
0.202038	0.899568	3.13e-09	0.126018	NUDT12		Peroxisomal NADH pyrophosphatase NUDT12	Q9BQG2	11.0464	11.4414	11.3013	11.531	11.5494	11.7089	11.4404	11.4295	0.141225	0.129569	no
-0.0933871	0.899486	3.13e-09	0.126042	CDC45		Cell division control protein 45 homolog	O75419	14.9936	14.9931	14.912	15.0718	14.9153	15.0129	14.8113	14.8573	0.0451877	0.0599588	no
0.138797	0.898938	3.13e-09	0.126201	RNF181		E3 ubiquitin-protein ligase RNF181	Q9P0P0	13.8723	13.9235	13.8309	13.8771	14.1273	13.7639	14.148	14.0197	0.0262908	0.0981975	no
0.134054	0.898529	3.13e-09	0.12632	USP24		Ubiquitin carboxyl-terminal hydrolase 24	Q9UPU5	13.6845	13.709	13.3682	13.4957	13.7198	13.7511	13.6257	13.697	0.110381	0.0874251	no
0.679577	0.897641	3.13e-09	0.126578	OC90		Otoconin-90	Q02509	11.7214	11.9055	11.9026	10.2922	12.9384	11.5849	12.2115	11.8053	0.400859	0.473268	no
0.276959	0.896136	3.13e-09	0.127018	CHAF1A		Chromatin assembly factor 1 subunit A	Q13111	9.95892	10.1078	9.93785	9.81107	9.97167	10.4598	10.5079	9.9842	0.084749	0.188206	no
-0.27617	0.896024	3.13e-09	0.12705	NKD1		Protein naked cuticle homolog 1	Q969G9	10.4591	10.3974	10.0829	10.3383	9.75012	10.3513	10.1913	9.88025	0.109583	0.16893	no
0.34099	0.893836	3.13e-09	0.127692	PIBF1		Progesterone-induced-blocking factor 1	Q8WXW3	9.55838	9.34591	9.10526	8.95933	9.65834	9.91512	9.29765	9.46174	0.184594	0.214414	no
0.100968	0.893115	3.13e-09	0.127904	GAPVD1		GTPase-activating protein and VPS9 domain-containing protein 1	Q14C86	15.8955	15.9105	16.0076	15.7811	16.1252	15.9791	15.9603	15.934	0.064019	0.0687628	no
-0.481572	0.892995	3.13e-09	0.12794	CUEDC2		CUE domain-containing protein 2	Q9H467	9.45167	9.44797	9.51069	9.87773	8.26839	9.09609	9.56347	9.43382	0.151952	0.271307	no
-0.213478	0.892476	3.13e-09	0.128093	MTRF1L		Peptide chain release factor 1-like, mitochondrial	Q9UGC7	10.666	10.2977	10.417	10.2175	10.282	10.1052	10.1789	10.1782	0.140178	0.132144	no
-0.651704	0.891513	3.13e-09	0.128377	CHRM1		Muscarinic acetylcholine receptor M1	P11229	13.1408	12.4893	12.7284	13.2799	10.978	12.8785	12.7614	12.4138	0.246665	0.362634	no
0.591207	0.890162	3.13e-09	0.128777	PAFAH1B3		Platelet-activating factor acetylhydrolase IB subunit gamma	Q15102	15.3534	15.6084	15.7692	14.4507	16.815	15.4666	15.7685	15.4964	0.343133	0.497251	no
0.11725	0.890093	3.13e-09	0.128797	SH3GLB2		Endophilin-B2	Q9NR46	14.0677	14.0878	13.9221	13.8543	14.2218	14.1206	14.0497	14.0088	0.0779316	0.0789551	no
0.184565	0.889996	3.13e-09	0.128826	HS1BP3		HCLS1-binding protein 3	Q53T59	13.1479	13.162	13.3311	12.9489	13.5825	13.1343	13.385	13.2265	0.107518	0.136154	no
0.116361	0.888999	3.13e-09	0.129122	TLN1		Talin-1	Q9Y490	16.9031	16.8581	16.9638	16.7066	17.1245	16.9118	16.9759	16.8848	0.074479	0.0820266	no
-0.233219	0.88869	3.13e-09	0.129214	MRPL20		39S ribosomal protein L20, mitochondrial	Q9BYC9	12.3288	12.3566	12.075	12.0966	11.8939	12.2839	11.6366	12.1098	0.103063	0.15813	no
-0.683226	0.888291	3.13e-09	0.129333	BCL7B		B-cell CLL/lymphoma 7 protein family member B	Q9BQE9	13.3605	12.8186	13.6693	13.1258	12.323	12.9371	13.5856	11.3956	0.248417	0.415152	no
-0.310347	0.887211	3.13e-09	0.129655	PKP2		Plakophilin-2	Q99959	9.90537	10.2878	10.0679	10.211	9.65919	10.0509	9.40951	10.111	0.114694	0.188321	no
0.103756	0.886608	3.13e-09	0.129835	DCTN3		Dynactin subunit 3	O75935	14.7661	14.7335	14.7572	14.6224	14.9745	14.8162	14.7906	14.7129	0.045078	0.0715186	no
-0.321237	0.886433	3.13e-09	0.129887	ESPL1		Separin	Q14674	10.3311	10.5479	10.3171	10.3329	9.47503	10.3179	10.221	10.2301	0.0795621	0.184292	no
-0.399025	0.886285	3.13e-09	0.129932	NFATC4		Nuclear factor of activated T-cells, cytoplasmic 4	Q14934	16.7987	16.8538	16.5837	17.3286	15.8003	16.6171	16.5894	16.962	0.23051	0.278181	no
-0.393738	0.884786	3.13e-09	0.130381	NUDCD3		NudC domain-containing protein 3	Q8IVD9	15.1693	14.5487	14.0949	15.1582	14.1035	14.5629	14.5558	14.1739	0.334059	0.314704	no
0.31057	0.882769	3.13e-09	0.130988	CDC42BPB		Serine/threonine-protein kinase MRCK beta	Q9Y5S2	9.34458	9.63462	9.27981	9.20127	9.81501	9.58114	9.33895	9.96745	0.136972	0.196762	yes
0.169746	0.88267	3.13e-09	0.131018	PYCR3		Pyrroline-5-carboxylate reductase 3	Q53H96	13.4163	13.4797	13.595	13.3292	13.8427	13.3616	13.6992	13.5958	0.0779806	0.125227	no
-0.586426	0.881089	3.13e-09	0.131496	FRA10AC1		Protein FRA10AC1	Q70Z53	9.06463	9.41702	8.47271	8.62972	8.60816	8.8993	8.20268	7.52823	0.302231	0.367639	no
0.183348	0.879564	3.13e-09	0.131958	DHX57		Putative ATP-dependent RNA helicase DHX57	Q6P158	12.1102	12.0301	12.1578	11.7849	12.4401	12.1734	12.1725	12.0303	0.110108	0.128201	no
0.133215	0.879229	3.13e-09	0.13206	RPL29		60S ribosomal protein L29	P47914	16.7819	16.7204	16.8481	16.5036	16.9902	16.8078	16.8465	16.7423	0.099974	0.0938218	no
1.51764	0.878197	3.13e-09	0.132374	LYRM2		LYR motif-containing protein 2	Q9NU23	10.2287	10.5833	11.3573	6.79405	12.4298	10.8917	11.5677	10.1448	0.756894	0.770475	no
-0.131048	0.876873	3.13e-09	0.132778	ASCC3		Activating signal cointegrator 1 complex subunit 3	Q8N3C0	12.3609	12.2792	12.4425	12.396	12.2059	12.4182	12.2312	12.099	0.0473907	0.0820299	no
0.185621	0.876797	3.13e-09	0.132802	S100A4		Protein S100-A4	P26447	14.8431	14.9004	14.9385	14.5512	15.2139	14.7545	15.0725	14.9348	0.115417	0.136445	no
-0.137889	0.876629	3.13e-09	0.132853	GTF2H1		General transcription factor IIH subunit 1	P32780	12.0319	11.9657	11.9283	12.1085	11.7771	12.0307	11.7525	11.9225	0.0552721	0.0847664	no
0.0863475	0.876134	3.13e-09	0.133004	ERP29		Endoplasmic reticulum resident protein 29	P30040	17.6302	17.6777	17.7421	17.6105	17.782	17.6348	17.8352	17.7539	0.0409215	0.0569438	no
-0.170071	0.87509	3.13e-09	0.133324	DENND10P1;DENND10		Putative DENN domain-containing protein 10 B;DENN domain-containing protein 10	Q6NSW5;Q8TCE6	11.138	11.1466	11.0196	11.1487	10.9724	11.1649	10.8476	10.7877	0.0424466	0.0993825	no
-0.220981	0.875079	3.13e-09	0.133328	BRD9		Bromodomain-containing protein 9	Q9H8M2	10.7258	10.8223	10.6617	10.8126	10.4278	10.8952	10.3472	10.4683	0.0523871	0.139451	no
-0.130961	0.873927	3.13e-09	0.133682	NIPSNAP1		Protein NipSnap homolog 1	Q9BPW8	13.243	13.2053	13.2118	13.4631	13.1534	13.226	12.9907	13.2291	0.0883776	0.09081	no
-0.13182	0.873757	3.13e-09	0.133734	HDAC3		Histone deacetylase 3	O15379	11.4343	11.3152	11.3801	11.3962	11.2525	11.1143	11.3004	11.3312	0.0342093	0.0671908	no
-0.115811	0.873717	3.13e-09	0.133747	RPTOR		Regulatory-associated protein of mTOR	Q8N122	12.9001	12.8685	12.8128	12.737	12.7764	12.8352	12.6026	12.6411	0.0490994	0.0721377	no
-0.254477	0.872538	3.13e-09	0.13411	CRPPA		D-ribitol-5-phosphate cytidylyltransferase	A4D126	10.1114	10.4066	10.2887	10.5276	9.98264	9.98155	10.4276	9.92467	0.121249	0.163349	no
0.208299	0.872101	3.13e-09	0.134245	USP4		Ubiquitin carboxyl-terminal hydrolase 4	Q13107	12.9664	13.0173	13.0543	12.6743	13.4534	12.8946	13.1459	13.0516	0.113531	0.158618	no
0.142045	0.870639	3.13e-09	0.134698	ZRANB2		Zinc finger Ran-binding domain-containing protein 2	O95218	14.6783	14.7513	14.812	14.6529	15.0549	14.6286	14.9434	14.8358	0.0502961	0.105827	no
-0.282474	0.870322	3.13e-09	0.134796	RIOX2		Ribosomal oxygenase 2	Q8IUF8	10.9253	10.4688	10.5443	10.4555	10.2286	10.6982	10.0165	10.3208	0.163766	0.196908	no
0.236508	0.870287	3.13e-09	0.134807	CHRAC1		Chromatin accessibility complex protein 1	Q9NRG0	13.4541	13.3882	13.5853	12.9365	13.7912	13.422	13.6828	13.4141	0.180865	0.166107	no
-0.168993	0.869948	3.13e-09	0.134913	SIRT5		NAD-dependent protein deacylase sirtuin-5, mitochondrial	Q9NXA8	11.7728	11.5852	11.8891	11.505	11.4302	11.4996	11.4784	11.6678	0.121571	0.115412	no
0.0922848	0.869581	3.13e-09	0.135026	SPRYD4		SPRY domain-containing protein 4	Q8WW59	12.8576	12.7188	12.7481	12.7355	12.8487	12.8034	12.8481	12.9289	0.0444207	0.0506164	no
-0.0862643	0.869437	3.13e-09	0.135071	AMDHD2		N-acetylglucosamine-6-phosphate deacetylase	Q9Y303	14.0093	14.0243	14.082	14.1898	13.9705	14.0174	14.032	13.9404	0.05773	0.0539672	no
-0.122559	0.867754	3.13e-09	0.135596	PRKAR2A		cAMP-dependent protein kinase type II-alpha regulatory subunit	P13861	14.6967	14.6145	14.7773	14.5204	14.627	14.6118	14.514	14.3659	0.0761075	0.0856388	yes
-0.294753	0.867109	3.13e-09	0.135797	DDB2		DNA damage-binding protein 2	Q92466	13.305	13.1204	13.3692	13.3992	12.473	12.8857	13.3107	13.3455	0.0838838	0.194338	no
0.236269	0.867006	3.13e-09	0.13583	GTF2A2		Transcription initiation factor IIA subunit 2	P52657	12.6779	12.7492	12.8702	12.4742	13.2383	12.5901	13.0955	12.7926	0.112697	0.182503	no
-0.0853701	0.86663	3.13e-09	0.135947	TXNRD1		Thioredoxin reductase 1, cytoplasmic	Q16881	17.1181	17.1229	17.1896	17.1981	17.1516	17.0067	16.9755	17.1535	0.0294972	0.0553314	no
0.307787	0.866168	3.13e-09	0.136092	POLR2D		DNA-directed RNA polymerase II subunit RPB4	O15514	12.4353	12.7874	12.7824	12.266	13.2179	12.3695	13.0346	12.8803	0.176294	0.231355	no
0.141522	0.865137	3.13e-09	0.136415	SETDB1		Histone-lysine N-methyltransferase SETDB1	Q15047	10.8973	10.8913	11.0389	10.8244	10.9642	11.0929	11.076	11.0848	0.0636597	0.0711945	no
0.311872	0.865013	3.13e-09	0.136454	ANKEF1		Ankyrin repeat and EF-hand domain-containing protein 1	Q9NU02	13.6315	13.63	13.8969	13.0231	14.0067	13.6822	14.1593	13.5807	0.235009	0.222585	no
-0.510496	0.863997	3.13e-09	0.136774	ITGB3BP		Centromere protein R	Q13352	9.26062	9.80906	9.43032	9.30505	9.31008	9.0358	9.39323	8.02397	0.183586	0.289985	no
-0.123173	0.863949	3.13e-09	0.136789	TBP		TATA-box-binding protein	P20226	11.6173	11.5933	11.4957	11.6764	11.3792	11.5252	11.5308	11.4548	0.0516443	0.0652831	no
-0.0931473	0.863843	3.13e-09	0.136822	PPP2CA		Serine/threonine-protein phosphatase 2A catalytic subunit alpha isoform	P67775	17.0704	17.1512	17.122	17.1974	17.0392	16.9454	16.9949	17.189	0.0368262	0.0631184	no
0.136159	0.862804	3.13e-09	0.13715	PATL1		Protein PAT1 homolog 1	Q86TB9	13.156	13.0759	13.3984	13.0876	13.177	13.3664	13.3859	13.3333	0.108541	0.0944347	no
0.657356	0.861357	3.13e-09	0.137608	NEK1		Serine/threonine-protein kinase Nek1	Q96PY6	11.4168	12.6493	13.5711	13.3552	13.5709	13.4569	13.4202	13.1738	0.532244	0.348697	yes
-0.070719	0.860886	3.13e-09	0.137757	ERO1A		ERO1-like protein alpha	Q96HE7	15.454	15.4339	15.4308	15.5286	15.311	15.4033	15.4136	15.4365	0.0320836	0.0415067	no
-0.232789	0.858661	3.13e-09	0.138465	TENT4B		Terminal nucleotidyltransferase 4B	Q8NDF8	11.0362	10.9059	10.7134	11.0208	10.5445	11.061	10.6136	10.5261	0.099873	0.157042	no
0.158181	0.857923	3.13e-09	0.1387	RB1CC1		RB1-inducible coiled-coil protein 1	Q8TDY2	11.3039	11.2361	11.0744	11.1461	11.4352	11.2828	11.4892	11.1861	0.0696816	0.0987405	no
-0.104632	0.856843	3.13e-09	0.139045	KPNA1		Importin subunit alpha-5	P52294	13.6381	13.5184	13.5463	13.6202	13.3799	13.6347	13.4292	13.4607	0.0398306	0.0681689	no
0.239228	0.85539	3.13e-09	0.139511	QSER1		Glutamine and serine-rich protein 1	Q2KHR3	10.0331	9.87679	9.62245	9.99556	10.0824	9.95021	10.0939	10.3584	0.12293	0.143961	no
0.10227	0.854845	3.13e-09	0.139687	CTU2		Cytoplasmic tRNA 2-thiolation protein 2	Q2VPK5	14.3637	14.3563	14.4999	14.2514	14.4703	14.4091	14.5815	14.4194	0.0711773	0.0696713	no
-0.121761	0.854405	3.13e-09	0.139828	VPS33B		Vacuolar protein sorting-associated protein 33B	Q9H267	13.3075	13.2629	13.2933	13.3365	13.1847	13.3107	12.9659	13.252	0.0212038	0.0778811	no
0.0905194	0.853129	3.13e-09	0.14024	RBBP5		Retinoblastoma-binding protein 5	Q15291	14.7709	14.8931	14.8942	14.9512	15.0719	14.8797	14.9753	14.9445	0.0518311	0.0602647	no
0.180782	0.853026	3.13e-09	0.140273	OSBPL9		Oxysterol-binding protein-related protein 9	Q96SU4	12.8921	13.2158	13.1037	12.8557	13.4755	13.1193	13.0723	13.1233	0.119927	0.138132	no
-0.18475	0.85255	3.13e-09	0.140427	ZBTB21		Zinc finger and BTB domain-containing protein 21	Q9ULJ3	10.6111	10.6132	10.6147	10.6306	10.5323	10.3277	10.2383	10.6322	0.00620423	0.101103	no
-0.116984	0.851786	3.13e-09	0.140674	ARID1A		AT-rich interactive domain-containing protein 1A	O14497	13.704	13.6206	13.6654	13.7512	13.6182	13.739	13.4906	13.4254	0.0385639	0.0785932	no
-0.129525	0.851568	3.13e-09	0.140745	GLTP		Glycolipid transfer protein	Q9NZD2	11.0262	11.0214	10.9891	11.006	10.826	10.849	10.9747	10.8748	0.0115753	0.0562039	no
0.185528	0.851375	3.13e-09	0.140807	ZNRF2		E3 ubiquitin-protein ligase ZNRF2	Q8NHG8	10.5151	10.9562	10.8174	10.5898	10.8654	10.908	10.922	10.9253	0.141898	0.109448	no
-0.122869	0.850772	3.13e-09	0.141003	CNOT11		CCR4-NOT transcription complex subunit 11	Q9UKZ1	11.4987	11.3979	11.3331	11.381	11.2334	11.3571	11.2975	11.2312	0.0488761	0.0623265	no
-0.120027	0.850431	3.13e-09	0.141114	EHMT2		Histone-lysine N-methyltransferase EHMT2	Q96KQ7	12.751	12.6868	12.7769	12.9843	12.5884	12.7022	12.6919	12.7363	0.0921163	0.0823595	no
0.136476	0.850291	3.13e-09	0.141159	TPD52		Tumor protein D52	P55327	13.0346	13.2015	13.1222	13.0587	13.3559	12.9975	13.3041	13.3054	0.0522418	0.0962537	no
0.19071	0.849938	3.13e-09	0.141274	COPS9		COP9 signalosome complex subunit 9	Q8WXC6	11.422	11.7889	11.6718	11.5007	11.7992	11.5202	11.9518	11.875	0.115309	0.132638	no
0.148242	0.849736	3.13e-09	0.14134	UIMC1		BRCA1-A complex subunit RAP80	Q96RL1	11.5742	11.4351	11.5665	11.4125	11.8375	11.6044	11.4923	11.647	0.0589352	0.0968924	no
0.144719	0.849161	3.13e-09	0.141527	TK1		Thymidine kinase, cytosolic	P04183	16.2908	16.3297	16.3779	16.191	16.6272	16.183	16.532	16.426	0.0543312	0.110046	yes
-0.159384	0.848888	3.13e-09	0.141616	MGME1		Mitochondrial genome maintenance exonuclease 1	Q9BQP7	12.4798	12.3086	12.4986	12.7391	12.4714	12.1951	12.3524	12.3698	0.124826	0.116073	no
-0.086226	0.846964	3.13e-09	0.142245	HBZ		Hemoglobin subunit zeta	P02008	22.0697	22.0009	21.9634	22.0028	21.8428	21.9667	21.9782	21.9042	0.0308806	0.0467841	no
-0.107698	0.846166	3.13e-09	0.142506	KIF21A		Kinesin-like protein KIF21A	Q7Z4S6	12.8423	12.9063	12.7258	12.901	12.7289	12.8604	12.6633	12.6921	0.056951	0.0677523	no
-0.185383	0.846091	3.13e-09	0.142531	ERAP2		Endoplasmic reticulum aminopeptidase 2	Q6P179	11.5479	11.5182	11.5177	11.895	11.5194	11.2087	11.4963	11.513	0.135374	0.132164	no
-0.209874	0.845178	3.13e-09	0.142831	RPL7L1		60S ribosomal protein L7-like 1	Q6DKI1	13.2744	13.2005	12.9588	13.4777	12.7331	13.2299	12.9837	13.1252	0.14694	0.156005	no
0.133368	0.845167	3.13e-09	0.142835	PABPN1		Polyadenylate-binding protein 2	Q86U42	15.0403	15.2645	15.1806	15.1294	15.511	15.1378	15.2051	15.2944	0.0649895	0.102944	no
0.355843	0.843145	3.13e-09	0.143501	GSR		Glutathione reductase, mitochondrial	P00390	16.6255	16.6554	16.8689	15.9519	17.3402	16.5326	17.0037	16.6485	0.245805	0.2712	no
0.156671	0.842668	3.13e-09	0.143659	PWP1		Periodic tryptophan protein 1 homolog	Q13610	14.042	14.0358	14.1242	13.719	14.3061	14.0474	14.1779	14.0161	0.117364	0.112517	no
0.26528	0.840932	3.13e-09	0.144234	OSTF1		Osteoclast-stimulating factor 1	Q92882	12.3367	12.3492	12.5112	12.0569	13.0886	12.3865	12.4332	12.4068	0.126823	0.229049	no
-0.357592	0.839488	3.13e-09	0.144714	AP5S1		AP-5 complex subunit sigma-1	Q9NUS5	9.44295	9.44768	9.49067	9.89717	9.1463	9.34098	8.72872	9.63209	0.162931	0.225774	no
0.105386	0.838911	3.13e-09	0.144907	FKBP7		Peptidyl-prolyl cis-trans isomerase FKBP7	Q9Y680	12.687	12.6186	12.6974	12.6499	12.747	12.6226	12.8365	12.8683	0.0249226	0.0666325	no
0.160519	0.838242	3.13e-09	0.14513	STAG2		Cohesin subunit SA-2	Q8N3U4	12.7734	12.9165	12.9271	12.6007	13.1894	12.8214	12.9625	12.8864	0.103089	0.118074	no
-0.388751	0.838022	3.13e-09	0.145204	EHMT1		Histone-lysine N-methyltransferase EHMT1	Q9H9B1	12.7188	12.7838	12.6175	12.4792	12.4818	12.6742	11.4155	12.4728	0.0905614	0.231681	no
0.200049	0.836001	3.13e-09	0.145881	CARHSP1		Calcium-regulated heat-stable protein 1	Q9Y2V2	16.0731	15.9539	16.2227	15.6519	16.3383	16.0013	16.3143	16.0478	0.161636	0.148349	no
0.283755	0.835756	3.13e-09	0.145964	ARFGEF2		Brefeldin A-inhibited guanine nucleotide-exchange protein 2	Q9Y6D5	12.644	12.8084	13.0057	12.284	13.3975	12.758	12.9174	12.8041	0.203488	0.224494	no
0.168717	0.83411	3.13e-09	0.146518	RPL13		60S ribosomal protein L13	P26373	18.2902	18.2673	18.3918	17.9568	18.6073	18.4086	18.3505	18.2145	0.123752	0.126292	no
-0.271386	0.834035	3.13e-09	0.146543	MKRN1		E3 ubiquitin-protein ligase makorin-1	Q9UHC7	10.5242	10.4137	10.4825	10.2895	10.4111	10.1728	9.68039	10.3601	0.069888	0.16335	no
0.271283	0.833755	3.13e-09	0.146637	MRPL23		39S ribosomal protein L23, mitochondrial	Q16540	12.5646	12.3026	12.6953	12.3365	12.9352	13.0028	12.2224	12.8238	0.131144	0.206828	no
-0.412889	0.832861	3.13e-09	0.146939	CYP11B2		Cytochrome P450 11B2, mitochondrial	P19099	10.9883	11.2554	10.1349	11.096	10.349	10.3987	10.9365	10.1388	0.294992	0.308722	no
-0.166719	0.832598	3.13e-09	0.147029	AGFG2		Arf-GAP domain and FG repeat-containing protein 2	O95081	10.7715	10.711	10.7169	10.5742	10.3654	10.6027	10.4866	10.6522	0.0570658	0.0904123	no
0.893371	0.830421	3.13e-09	0.147768	ZNF324;ZNF324B		Zinc finger protein 324A;Zinc finger protein 324B	O75467;Q6AW86	17.1682	17.7616	17.857	15.8833	19.4363	16.9517	18.1609	17.6947	0.486305	0.79218	no
0.221214	0.830296	3.13e-09	0.14781	TRIO		Triple functional domain protein	O75962	9.885	9.88955	9.91634	10.1839	10.4204	10.0259	10.2492	10.0641	0.104645	0.138186	yes
-0.12372	0.828532	3.13e-09	0.148412	LSS		Lanosterol synthase	P48449	12.3572	12.2148	12.1758	12.4069	12.2009	12.1794	12.2464	12.0331	0.0768566	0.0801161	no
0.156439	0.828408	3.13e-09	0.148454	PSMD8		26S proteasome non-ATPase regulatory subunit 8	P48556	15.7116	15.8175	15.8114	15.5196	16.1329	15.7381	15.8665	15.7483	0.0931324	0.123726	no
0.179543	0.827023	3.13e-09	0.148928	TRAPPC6B		Trafficking protein particle complex subunit 6B	Q86SZ2	13.2369	13.1771	13.2664	12.8148	13.4942	13.2148	13.356	13.1484	0.135351	0.129337	no
0.155585	0.825727	3.13e-09	0.149373	GLYR1		Putative oxidoreductase GLYR1	Q49A26	11.6268	11.4774	11.5804	11.3067	11.7881	11.7285	11.5721	11.5249	0.0958204	0.101826	no
0.128417	0.825478	3.13e-09	0.149459	PARN		Poly(A)-specific ribonuclease PARN	O95453	13.9253	14.0254	14.0519	13.9221	14.3009	13.9044	14.1574	14.0755	0.046669	0.0969898	no
-0.126304	0.824664	3.13e-09	0.14974	C8orf82		UPF0598 protein C8orf82	Q6P1X6	12.3071	12.1988	12.4843	12.2803	12.2119	12.159	12.0885	12.306	0.0852754	0.0850768	no
0.359314	0.824594	3.13e-09	0.149764	TXNDC12		Thioredoxin domain-containing protein 12	O95881	16.3987	16.5855	16.6674	15.9241	17.2785	16.2239	16.8908	16.6198	0.211649	0.292444	no
0.155193	0.824592	3.13e-09	0.149764	DUT		Deoxyuridine 5'-triphosphate nucleotidohydrolase, mitochondrial	P33316	17.8664	17.9151	18.0063	17.7929	18.2937	17.7885	18.1139	18.0054	0.0622681	0.123467	no
-0.152607	0.824047	3.13e-09	0.149952	NSRP1		Nuclear speckle splicing regulatory protein 1	Q9H0G5	11.1144	11.4945	11.3363	11.3193	11.2271	11.2108	11.1124	11.1037	0.106721	0.0980033	no
-1.87776	0.823952	3.13e-09	0.149985	PKN2		Serine/threonine-protein kinase N2	Q16513	14.7383	15.5254	15.1804	11.2195	10.8739	11.628	15.4772	11.1734	0.673707	0.986918	yes
0.117913	0.823633	3.13e-09	0.150095	UFD1		Ubiquitin recognition factor in ER-associated degradation protein 1	Q92890	15.6017	15.6074	15.689	15.5002	15.8506	15.5091	15.7825	15.7277	0.0533295	0.0877836	no
-0.142859	0.822984	3.13e-09	0.15032	SMG8		Protein SMG8	Q8ND04	11.5073	11.3972	11.4034	11.6333	11.4346	11.4238	11.1995	11.3118	0.0782309	0.0887675	no
0.0696282	0.822418	3.13e-09	0.150516	NOC2L		Nucleolar complex protein 2 homolog	Q9Y3T9	14.8681	14.935	14.9314	14.9349	15.0253	14.8915	15.0173	15.0138	0.0225374	0.0415837	no
0.0827779	0.821266	3.13e-09	0.150916	DMTN		Dematin	Q08495	13.3781	13.3913	13.3191	13.2949	13.4583	13.3269	13.4757	13.4537	0.0320093	0.0484386	no
0.220845	0.820896	3.13e-09	0.151044	PCNP		PEST proteolytic signal-containing nuclear protein	Q8WW12	15.4209	15.4283	15.6293	15.1102	15.9112	15.3225	15.7393	15.499	0.144308	0.174837	no
-0.264757	0.819757	3.13e-09	0.151441	DDHD2		Phospholipase DDHD2	O94830	13.4792	13.4466	13.4412	13.5985	13.4349	12.6329	13.418	13.4206	0.0519402	0.169671	no
0.178921	0.819674	3.13e-09	0.15147	FDX1		Adrenodoxin, mitochondrial	P10109	14.2339	14.2496	14.3603	13.9259	14.5319	14.1507	14.5285	14.2743	0.123127	0.135227	no
-0.145772	0.815745	3.13e-09	0.152846	CANX		Calnexin	P27824	13.8414	13.5979	13.7408	13.6206	13.5813	13.7595	13.3333	13.5436	0.0792514	0.106278	no
0.256607	0.814324	3.13e-09	0.153347	U2AF1L5;U2AF1		Splicing factor U2AF 35 kDa subunit-like protein;Splicing factor U2AF 35 kDa subunit	P0DN76;Q01081	13.8418	13.9831	13.8891	13.6868	14.6616	13.8446	13.9644	13.9567	0.0844885	0.239205	no
-2.09891	0.813918	3.13e-09	0.153491	PIEZO2		Piezo-type mechanosensitive ion channel component 2	Q9H5I5	8.09424	8.92806	8.61578	9.50801	2.28863	9.87644	7.4966	7.08879	0.41029	0.80299	no
-0.955961	0.813756	3.13e-09	0.153548	ZNF512B		Zinc finger protein 512B	Q96KM6	9.87134	9.9787	10.1764	9.89137	9.48756	10.0666	6.854	9.68587	0.0997567	0.384529	no
0.222078	0.813315	3.13e-09	0.153704	ARL3		ADP-ribosylation factor-like protein 3	P36405	15.7481	15.7834	15.9088	15.4391	16.2424	15.6172	16.0853	15.8228	0.1321	0.177834	no
1.24897	0.812345	3.13e-09	0.154048	XPNPEP3		Xaa-Pro aminopeptidase 3	Q9NQH7	12.6021	12.8104	13.5612	11.9975	16.6699	12.869	13.8199	12.6083	0.457811	1.68441	no
0.341435	0.811844	3.13e-09	0.154225	XRCC3		DNA repair protein XRCC3	O43542	10.9856	11.0039	11.0935	10.1113	11.4091	11.1699	11.0807	10.9002	0.269191	0.221377	no
1.2801	0.811586	3.13e-09	0.154317	C8orf88		Uncharacterized protein C8orf88	P0DMB2	11.1888	10.5472	11.0728	7.34924	12.2823	10.5071	11.8177	10.6713	0.64035	0.662659	no
0.524449	0.811027	3.13e-09	0.154516	CDC37L1		Hsp90 co-chaperone Cdc37-like 1	Q7L3B6	9.85056	9.68811	9.84029	9.61832	11.0286	9.205	10.2607	10.6007	0.0788873	0.442093	no
0.0718979	0.81099	3.13e-09	0.154529	PIP4K2B		Phosphatidylinositol 5-phosphate 4-kinase type-2 beta	P78356	14.791	14.6923	14.7184	14.7925	14.7889	14.7638	14.8974	14.8317	0.0352768	0.044403	no
0.810258	0.810845	3.13e-09	0.154581	SUPT4H1		Transcription elongation factor SPT4	P63272	10.3778	10.8133	10.9985	9.81753	12.9613	10.6766	11.2232	10.3872	0.333847	0.942706	no
-0.194454	0.810819	3.13e-09	0.15459	MTRR		Methionine synthase reductase	Q9UBK8	11.1219	11.213	11.3014	11.0916	10.6998	11.27	10.9982	10.9821	0.066376	0.128209	no
0.241386	0.810233	3.13e-09	0.154799	CAPN15		Calpain-15	O75808	9.83489	9.72608	9.61856	9.31289	9.83354	9.90503	9.72994	9.98944	0.148795	0.1351	no
0.130926	0.808983	3.13e-09	0.155245	SMC6		Structural maintenance of chromosomes protein 6	Q96SB8	11.5571	11.3958	11.5557	11.3288	11.6323	11.678	11.5242	11.5266	0.0793902	0.0780714	no
-0.157633	0.808944	3.13e-09	0.155259	TRIP4		Activating signal cointegrator 1	Q15650	10.8699	10.929	10.9649	10.9513	10.5791	10.9245	10.7167	10.8642	0.0287985	0.0886575	no
0.304962	0.80873	3.13e-09	0.155335	UBE2A		Ubiquitin-conjugating enzyme E2 A	P49459	13.1387	13.2381	13.4425	12.7066	13.8857	13.0147	13.4309	13.4145	0.202931	0.245537	no
-0.81976	0.808281	3.13e-09	0.155496	PHB2		Prohibitin-2	Q99623	10.2731	7.70021	7.91961	8.72627	7.93261	7.6292	8.00695	7.7714	0.914192	0.935551	no
-0.112988	0.807605	3.13e-09	0.155738	MAN2B1		Lysosomal alpha-mannosidase	O00754	12.576	12.5207	12.5192	12.7006	12.354	12.4021	12.5453	12.5632	0.0603445	0.0737887	no
0.324451	0.80738	3.13e-09	0.155819	RPL21		60S ribosomal protein L21	P46778	15.0659	15.0017	15.294	14.6078	15.8433	15.2977	15.3123	14.814	0.189448	0.274026	no
-0.288455	0.806907	3.13e-09	0.155989	USP36		Ubiquitin carboxyl-terminal hydrolase 36	Q9P275	9.14226	9.69327	9.40086	9.44105	9.12206	8.8633	9.25944	9.27882	0.15595	0.172805	no
0.339822	0.806154	3.13e-09	0.156259	PCBD2		Pterin-4-alpha-carbinolamine dehydratase 2	Q9H0N5	12.8376	13.3524	13.2634	12.7991	13.8798	12.8016	13.4833	13.4472	0.196707	0.276785	no
0.248378	0.806094	3.13e-09	0.156281	PRDX6		Peroxiredoxin-6	P30041	20.0955	20.1114	20.3378	19.8727	20.7899	20.0687	20.4352	20.1172	0.131735	0.213818	no
0.109353	0.805779	3.13e-09	0.156394	HNRNPR		Heterogeneous nuclear ribonucleoprotein R	O43390	16.0098	16.0291	16.024	15.8153	16.2143	16.13	16.0212	15.95	0.068971	0.0811499	no
-0.498629	0.805374	3.13e-09	0.15654	PNPLA2		Patatin-like phospholipase domain-containing protein 2	Q96AD5	10.0659	10.6418	10.8214	10.9034	10.6476	10.5192	10.079	9.19205	0.234695	0.320387	no
0.189694	0.804501	3.13e-09	0.156855	PSMD4		26S proteasome non-ATPase regulatory subunit 4	P55036	14.2257	14.1783	14.3653	13.7804	14.4652	14.2409	14.4297	14.1726	0.163198	0.138221	no
-0.29009	0.804452	3.13e-09	0.156873	BAZ1B		Tyrosine-protein kinase BAZ1B	Q9UIG0	12.8803	12.3968	12.5675	12.1273	11.8119	12.2698	12.5705	12.1594	0.220059	0.229269	no
-0.417943	0.804447	3.13e-09	0.156875	M6PR		Cation-dependent mannose-6-phosphate receptor	P20645	9.66762	9.57492	9.7884	9.92938	9.28134	10.0638	8.68746	9.25595	0.107316	0.278997	no
0.133744	0.804259	3.13e-09	0.156943	ATP6V1F		V-type proton ATPase subunit F	Q16864	13.9624	14.1079	14.0956	14.0129	14.3359	13.9282	14.2782	14.1714	0.0477238	0.101886	no
0.171794	0.803956	3.13e-09	0.157052	ARPC5L		Actin-related protein 2/3 complex subunit 5-like protein	Q9BPX5	15.1259	15.1165	15.2089	15.0213	15.6179	15.043	15.3371	15.1618	0.0530403	0.145919	no
0.477098	0.803577	3.13e-09	0.157189	RPS21		40S ribosomal protein S21	P63220	15.8653	15.9829	16.3765	15.2964	17.1567	15.8312	16.505	15.9366	0.295039	0.427812	no
0.469035	0.802539	3.13e-09	0.157565	RPLP0		60S acidic ribosomal protein P0	P05388	14.8734	14.7585	15.2339	14.2051	16.0462	15.0623	15.2533	14.5851	0.280557	0.423162	no
0.98227	0.802441	3.13e-09	0.157601	TNRC6A		Trinucleotide repeat-containing gene 6A protein	Q8NDV7	7.56842	9.97656	10.7382	8.17996	9.82931	9.81546	10.1243	10.6232	0.885195	0.557501	no
-0.0839218	0.802397	3.13e-09	0.157617	XPO1		Exportin-1	O14980	16.2251	16.1833	16.1923	16.3003	16.1345	16.2487	16.0168	16.1653	0.0373053	0.057629	no
0.210839	0.802381	3.13e-09	0.157623	RAB11B		Ras-related protein Rab-11B	Q15907	15.5356	15.6634	15.7257	15.3194	16.0932	15.4295	15.8218	15.7429	0.120403	0.171491	no
0.192861	0.802215	3.13e-09	0.157683	CECR2		Cat eye syndrome critical region protein 2	Q9BXF3	10.2889	10.2487	9.8994	10.0536	10.3229	10.4056	10.2611	10.2725	0.122918	0.106869	no
-0.120539	0.801957	3.13e-09	0.157777	BCL7A		B-cell CLL/lymphoma 7 protein family member A	Q4VC05	13.42	13.5011	13.1989	13.5699	13.2781	13.2734	13.332	13.3242	0.107889	0.0884242	no
-0.247105	0.80163	3.13e-09	0.157895	CRK		Adapter molecule crk	P46108	15.5842	15.2598	15.3753	15.6941	14.7493	15.2862	15.3975	15.4919	0.135849	0.179429	no
-0.131952	0.800479	3.13e-09	0.158315	NIPSNAP2		Protein NipSnap homolog 2	O75323	13.5231	13.5642	13.6352	13.3465	13.4445	13.4966	13.1813	13.4187	0.0830503	0.0946068	no
-0.152048	0.800369	3.13e-09	0.158355	FIBP		Acidic fibroblast growth factor intracellular-binding protein	O43427	11.3583	11.1054	11.1251	11.2212	11.1811	11.0654	11.0718	10.8835	0.0816813	0.0950087	no
0.298978	0.799957	3.13e-09	0.158505	NSMCE2		E3 SUMO-protein ligase NSE2	Q96MF7	11.0925	11.3984	10.8566	10.496	11.5894	11.0919	11.2359	11.1221	0.259462	0.220149	no
-0.156959	0.799826	3.13e-09	0.158553	AIMP2		Aminoacyl tRNA synthase complex-interacting multifunctional protein 2	Q13155	14.8593	14.782	14.8352	14.7856	14.4435	14.989	14.6265	14.5751	0.0263549	0.119729	no
-1.15307	0.799294	3.13e-09	0.158747	MICAL3		[F-actin]-monooxygenase MICAL3	Q7RTP6	12.0748	11.6036	11.3563	15.2875	11.5512	11.1734	11.4165	11.5688	1.46568	1.71275	no
0.23597	0.796213	3.13e-09	0.159877	RPL34		60S ribosomal protein L34	P49207	17.0019	17.121	17.1627	16.6064	17.5995	17.0019	17.1755	17.059	0.163205	0.194123	no
0.145172	0.795918	3.13e-09	0.159986	ACYP1		Acylphosphatase-1	P07311	15.4482	15.4771	15.6192	15.3824	15.8023	15.3619	15.7397	15.6036	0.07045	0.11462	no
1.42908	0.795057	3.13e-09	0.160304	TRAF4		TNF receptor-associated factor 4	Q9BUZ4	8.71464	8.58434	8.51917	8.37491	11.5275	8.10718	12.3057	7.96897	0.0975438	1.42622	no
0.15927	0.794993	3.13e-09	0.160327	PAXIP1		PAX-interacting protein 1	Q6ZW49	11.3425	11.6202	11.8109	11.7534	11.7711	11.7882	11.8238	11.7811	0.138061	0.102426	no
0.266847	0.793692	3.13e-09	0.160808	URB1		Nucleolar pre-ribosomal-associated protein 1	O60287	9.53155	9.80155	9.56529	9.55839	9.56346	10.2364	9.74349	9.98078	0.0907394	0.188629	no
-0.0811619	0.793454	3.13e-09	0.160896	AP1G1		AP-1 complex subunit gamma-1	O43747	14.608	14.5721	14.5838	14.6381	14.538	14.5522	14.3837	14.6034	0.0202821	0.0520371	no
0.237035	0.793192	3.13e-09	0.160993	CKMT1A		Creatine kinase U-type, mitochondrial	P12532	15.9807	15.8323	16.0997	15.4088	16.2575	16.2326	15.9863	15.7932	0.194763	0.178378	no
0.102383	0.792963	3.13e-09	0.161078	DCAF7		DDB1- and CUL4-associated factor 7	P61962	13.4167	13.5557	13.4613	13.678	13.5636	13.5868	13.6652	13.7057	0.0812783	0.0706271	no
-0.19012	0.792879	3.13e-09	0.161109	POLR2M		DNA-directed RNA polymerase II subunit GRINL1A	P0CAP2	11.3053	11.1895	11.2782	11.3583	11.1258	11.1692	10.7506	11.3252	0.0484654	0.122674	no
0.140981	0.792788	3.13e-09	0.161143	KCTD9		BTB/POZ domain-containing protein KCTD9	Q7L273	11.4555	11.5846	11.5162	11.708	11.7175	11.5169	11.8019	11.7921	0.0760547	0.0932842	no
-0.191889	0.792657	3.13e-09	0.161192	ALG13		Putative bifunctional UDP-N-acetylglucosamine transferase and deubiquitinase ALG13	Q9NP73	12.502	12.5594	12.4632	12.9661	12.214	12.6049	12.4956	12.4087	0.172423	0.157139	no
0.306108	0.792544	3.13e-09	0.161234	UBE2N		Ubiquitin-conjugating enzyme E2 N	P61088	17.9788	18.0018	18.1966	17.5788	18.774	17.806	18.3258	18.0746	0.17048	0.266709	no
0.381949	0.792476	3.13e-09	0.161259	GEMIN4		Gem-associated protein 4	P57678	14.6204	14.6336	15.6396	15.7171	15.5236	15.4977	15.5993	15.5179	0.404327	0.262006	no
0.0795238	0.792401	3.13e-09	0.161287	PIP4K2A		Phosphatidylinositol 5-phosphate 4-kinase type-2 alpha	P48426	14.9344	14.9604	14.9135	15.0434	14.9638	14.9822	15.1075	15.1163	0.0400106	0.0542687	no
-0.54836	0.792229	3.13e-09	0.161351	TMED10		Transmembrane emp24 domain-containing protein 10	P49755	11.9095	11.7089	10.8027	11.3777	11.6326	11.3463	10.0663	10.5602	0.306961	0.386996	no
0.0772209	0.792106	3.13e-09	0.161397	ZC3H18		Zinc finger CCCH domain-containing protein 18	Q86VM9	12.8352	12.9147	12.861	12.946	12.9886	12.9166	12.9783	12.9822	0.0348898	0.0392815	no
0.385152	0.790269	3.13e-09	0.162081	PNKP		Bifunctional polynucleotide phosphatase/kinase	Q96T60	13.2863	13.3668	13.2984	12.4582	14.137	13.3068	13.3039	13.2026	0.254317	0.326429	no
-1.14388	0.789861	3.13e-09	0.162233	ZNF592		Zinc finger protein 592	Q92610	7.19108	7.84967	7.45922	6.84011	5.83063	7.39086	4.33186	7.21118	0.296046	0.509028	no
0.0823057	0.789699	3.13e-09	0.162293	RNPS1		RNA-binding protein with serine-rich domain 1	Q15287	14.2199	14.1455	14.2257	14.0484	14.3026	14.1896	14.2731	14.2034	0.0565123	0.0533509	no
-0.209398	0.789601	3.13e-09	0.16233	PPM1H		Protein phosphatase 1H	Q9ULR3	12.6551	12.463	12.01	12.4393	12.1363	12.0144	12.19	12.389	0.177677	0.163779	no
0.863759	0.78946	3.13e-09	0.162383	KBTBD6;KBTBD7		Kelch repeat and BTB domain-containing protein 6;Kelch repeat and BTB domain-containing protein 7	Q86V97;Q8WVZ9	8.07944	8.24997	6.09958	6.3764	7.81476	7.63171	8.38766	8.4263	0.677775	0.46714	no
0.623902	0.789281	3.13e-09	0.16245	CKAP4		Cytoskeleton-associated protein 4	Q07065	7.66104	8.62798	7.74497	6.84042	8.19276	8.36329	8.00966	8.8043	0.508884	0.384189	no
-0.310657	0.789183	3.13e-09	0.162486	MMADHC		Methylmalonic aciduria and homocystinuria type D protein, mitochondrial	Q9H3L0	10.3207	10.5201	10.5198	9.96042	9.8922	10.4661	10.085	9.63517	0.171224	0.220201	no
0.243565	0.78853	3.13e-09	0.162731	ARFGAP3		ADP-ribosylation factor GTPase-activating protein 3	Q9NP61	11.7981	11.9481	12.0619	11.8564	12.5746	11.7352	12.2617	12.0673	0.0806348	0.205816	no
-0.420537	0.788485	3.13e-09	0.162748	FBXO9		F-box only protein 9	Q9UK97	10.1475	10.827	10.6613	10.7432	10.147	10.7294	9.40841	10.412	0.192331	0.280409	no
0.213074	0.788451	3.13e-09	0.16276	LETM1		Mitochondrial proton/calcium exchanger protein	O95202	10.2457	10.2454	10.3697	9.92663	10.528	10.2569	10.5825	10.2724	0.125152	0.13666	no
0.40987	0.788311	3.13e-09	0.162813	FASTKD1		FAST kinase domain-containing protein 1, mitochondrial	Q53R41	10.9649	10.27	11.2175	10.0597	11.2286	11.3269	10.6278	10.9684	0.373318	0.293402	yes
-0.0715761	0.787919	3.13e-09	0.16296	POLA2		DNA polymerase alpha subunit B	Q14181	13.6869	13.6906	13.7873	13.704	13.6557	13.705	13.5989	13.6228	0.0332875	0.040253	no
0.0884134	0.787892	3.13e-09	0.16297	C7orf50		Uncharacterized protein C7orf50	Q9BRJ6	12.567	12.7627	12.6669	12.637	12.7644	12.7622	12.7025	12.7581	0.0566203	0.050167	no
0.341698	0.787673	3.13e-09	0.163052	SSBP3		Single-stranded DNA-binding protein 3	Q9BWW4	12.9432	13.2069	13.3034	12.5704	13.8948	12.8371	13.3162	13.3426	0.214323	0.288605	no
-0.6654	0.787483	3.13e-09	0.163124	GNAI3		Guanine nucleotide-binding protein G(i) subunit alpha	P08754	9.90711	9.14219	8.89925	9.7982	9.33615	9.46223	7.53558	8.75119	0.328636	0.414191	no
-0.145592	0.786825	3.13e-09	0.163371	SFN		14-3-3 protein sigma	P31947	11.2384	11.3123	11.1201	11.2206	11.0633	10.9479	11.2729	11.025	0.0545093	0.0893534	no
-0.0539301	0.786742	3.13e-09	0.163402	GATAD2A		Transcriptional repressor p66-alpha	Q86YP4	15.1431	15.1139	15.1076	15.1784	15.082	15.0908	15.0804	15.0741	0.0225541	0.0252733	no
0.103894	0.786453	3.13e-09	0.163511	RAB24		Ras-related protein Rab-24	Q969Q5	11.3986	11.35	11.3239	11.3783	11.4299	11.4306	11.516	11.4899	0.0226108	0.0458928	no
-0.177107	0.785142	3.13e-09	0.164005	SDF4		45 kDa calcium-binding protein	Q9BRK5	11.9451	11.8582	12.188	11.9931	11.8553	11.9348	11.9723	11.5135	0.0991841	0.125593	no
0.160051	0.785055	3.13e-09	0.164038	GTF3C4		General transcription factor 3C polypeptide 4	Q9UKN8	13.5549	13.507	13.7567	13.2502	13.7868	13.7613	13.6358	13.525	0.142261	0.119263	no
-0.49216	0.784941	3.13e-09	0.164081	HCRTR2		Orexin receptor type 2	O43614	14.3542	14.2368	14.1077	15.0986	13.0054	14.1393	14.1701	14.5139	0.344366	0.371076	no
0.182433	0.784114	3.13e-09	0.164394	WDR1		WD repeat-containing protein 1	O75083	16.3974	16.2574	16.4484	15.9317	16.6601	16.3845	16.4576	16.2625	0.152088	0.140253	no
-0.117558	0.783726	3.13e-09	0.164541	MCRIP2		MAPK regulated corepressor interacting protein 2	Q9BUT9	11.5969	11.7319	11.6326	11.5191	11.4625	11.5592	11.5694	11.4192	0.0615287	0.0684804	no
0.138412	0.783461	3.13e-09	0.164641	QTRT2		Queuine tRNA-ribosyltransferase accessory subunit 2	Q9H974	13.4168	13.549	13.4659	13.3693	13.7744	13.333	13.6625	13.5848	0.0535972	0.107118	no
0.158173	0.783192	3.13e-09	0.164743	CDC123		Cell division cycle protein 123 homolog	O75794	12.7543	12.8069	13.0368	13.094	13.1807	13.1092	12.8432	13.1916	0.115768	0.118409	no
-0.164416	0.783184	3.13e-09	0.164746	HAUS3		HAUS augmin-like complex subunit 3	Q68CZ6	11.2117	11.1538	10.9273	11.0803	11.0152	11.0325	10.7036	10.9642	0.0834673	0.104073	no
0.327948	0.78274	3.13e-09	0.164915	SMARCA5		SWI/SNF-related matrix-associated actin-dependent regulator of chromatin subfamily A member 5	O60264	14.8234	14.8746	15.0468	14.2521	15.6553	14.749	14.9811	14.9232	0.216812	0.285003	no
0.140539	0.782646	3.13e-09	0.164951	MRPS17		28S ribosomal protein S17, mitochondrial	Q9Y2R5	12.3491	12.351	12.4178	12.2158	12.7174	12.4784	12.3348	12.3652	0.0577085	0.107849	no
0.0981807	0.782353	3.13e-09	0.165062	RAB35		Ras-related protein Rab-35	Q15286	12.5804	12.5725	12.5479	12.7547	12.7211	12.6671	12.6704	12.7896	0.0677769	0.0621059	no
-1.8961	0.781664	3.13e-09	0.165324	SCAMP1		Secretory carrier-associated membrane protein 1	O15126	9.5172	9.63259	9.40118	8.34737	9.49915	2.92489	8.53022	8.35969	0.331975	0.561699	no
0.227595	0.781609	3.13e-09	0.165345	CDC42EP4		Cdc42 effector protein 4	Q9H3Q1	12.5255	13.2687	13.1503	13.242	13.2856	13.1958	13.2907	13.3247	0.214993	0.152584	no
0.0928956	0.780308	3.13e-09	0.165841	BCL2L13		Bcl-2-like protein 13	Q9BXK5	13.3606	13.2993	13.3936	13.1894	13.355	13.3737	13.5061	13.3796	0.0612511	0.0613621	no
-0.313885	0.780172	3.13e-09	0.165893	THYN1		Thymocyte nuclear protein 1	Q9P016	14.9958	14.6919	14.7622	15.2744	14.035	15.0712	14.6449	14.7177	0.188356	0.237878	no
0.236391	0.77987	3.13e-09	0.166008	NOP56		Nucleolar protein 56	O00567	10.8489	11.1323	11.0231	10.4292	11.2179	11.1675	10.9007	11.0929	0.199596	0.159405	no
0.241997	0.779857	3.13e-09	0.166013	NGLY1		Peptide-N(4)-(N-acetyl-beta-glucosaminyl)asparagine amidase	Q96IV0	12.8377	12.9753	13.0433	12.4708	13.4851	12.8545	12.9866	12.9689	0.165824	0.201138	no
0.166637	0.779067	3.13e-09	0.166316	LMNB2		Lamin-B2	Q03252	11.3201	11.3609	11.3797	11.1125	11.5515	11.1896	11.5694	11.5293	0.0820787	0.114955	no
-0.169703	0.77891	3.13e-09	0.166376	RPL37		60S ribosomal protein L37	P61927	12.3581	12.2362	12.3466	11.9902	11.9291	12.2004	12.2274	11.8954	0.113196	0.124975	no
-0.188058	0.778015	3.13e-09	0.166719	CCNY		Cyclin-Y	Q8ND76	10.1155	9.96884	10.0962	10.0617	9.76082	10.0414	9.74799	9.93975	0.0444036	0.0965275	no
0.541691	0.777914	3.13e-09	0.166758	ZFAND6		AN1-type zinc finger protein 6	Q6FIF0	9.95365	10.697	10.6398	9.45721	11.4332	9.93061	10.8548	10.6959	0.376992	0.425467	no
-0.0940764	0.7767	3.13e-09	0.167225	TIPRL		TIP41-like protein	O75663	15.854	15.8263	15.8542	15.9796	15.7945	15.8623	15.6204	15.8605	0.0485841	0.0677006	no
0.170463	0.776592	3.13e-09	0.167266	CASP6		Caspase-6	P55212	15.4363	15.3966	15.5851	15.1583	15.7973	15.3616	15.6609	15.4384	0.119787	0.137598	no
0.267071	0.776368	3.13e-09	0.167352	UBE2T		Ubiquitin-conjugating enzyme E2 T	Q9NPD8	11.7577	11.8191	11.9365	11.325	12.4426	11.8351	11.8833	11.7455	0.171605	0.224162	no
-0.319452	0.773707	3.13e-09	0.168381	CCNT2		Cyclin-T2	O60583	9.75485	9.76513	9.88126	10.3028	9.37445	9.29277	9.68208	10.0769	0.191674	0.233808	no
0.114034	0.773195	3.13e-09	0.16858	UNC119B		Protein unc-119 homolog B	A6NIH7	12.5161	12.5905	12.7136	12.6667	12.8324	12.5657	12.8054	12.7397	0.0598154	0.0791319	no
-1.02538	0.773098	3.13e-09	0.168617	MED13L		Mediator of RNA polymerase II transcription subunit 13-like	Q71F56	10.5756	10.1856	10.2676	9.85406	10.3444	6.88961	9.19666	10.3506	0.203972	0.45255	no
0.271695	0.772914	3.13e-09	0.168689	ATG4A		Cysteine protease ATG4A	Q8WYN0	11.0535	11.0406	11.2398	10.3821	11.2987	11.365	11.1277	11.0113	0.232266	0.183557	no
0.255338	0.771988	3.13e-09	0.169049	STK4		Serine/threonine-protein kinase 4	Q13043	13.762	13.743	13.5415	14.4037	13.9605	14.004	14.1899	14.3171	0.283758	0.207208	yes
-0.190803	0.771231	3.13e-09	0.169344	MYO1C		Unconventional myosin-Ic	O00159	10.5654	10.6054	10.4499	10.4624	10.2146	10.6413	10.242	10.222	0.0531898	0.121535	no
-0.280312	0.771171	3.13e-09	0.169367	CENPX		Centromere protein X	A8MT69	11.1104	10.9294	10.7671	10.9959	10.1858	11.1208	10.7983	10.5766	0.0982014	0.196548	no
2.06795	0.770108	3.13e-09	0.169782	ARID4A		AT-rich interactive domain-containing protein 4A	P29374	1.25579	8.13668	7.78588	7.38129	7.9283	8.19033	8.57751	8.13527	0.714049	0.480185	no
-0.399526	0.769763	3.13e-09	0.169917	RAB13		Ras-related protein Rab-13	P51153	12.3361	11.969	12.1261	11.6686	11.1783	12.3055	11.1144	11.9036	0.190308	0.298469	no
-0.283536	0.769343	3.13e-09	0.170082	POGZ		Pogo transposable element with ZNF domain	Q7Z3K3	9.7432	9.43594	9.48429	10.0582	9.24584	9.46379	9.23339	9.6445	0.205938	0.201477	no
0.208758	0.767706	3.13e-09	0.170724	ZMYM4		Zinc finger MYM-type protein 4	Q5VZL5	10.2897	10.363	10.6803	10.2972	10.8318	10.7012	10.3774	10.5549	0.135327	0.146895	no
-0.129338	0.767377	3.13e-09	0.170853	RBM27		RNA-binding protein 27	Q9P2N5	14.0827	14.008	14.0131	13.7674	13.8546	13.9257	13.9301	13.6435	0.0918079	0.0968792	no
0.190455	0.76721	3.13e-09	0.170919	PSMB6		Proteasome subunit beta type-6	P28072	16.833	16.8685	16.975	16.5665	17.2799	16.702	17.115	16.908	0.115713	0.157672	no
0.151695	0.766101	3.13e-09	0.171356	AK4		Adenylate kinase 4, mitochondrial	P27144	14.3767	14.4369	14.4609	14.1617	14.7783	14.3334	14.5075	14.4239	0.090774	0.125042	yes
-0.120161	0.766001	3.13e-09	0.171395	RAPGEF6		Rap guanine nucleotide exchange factor 6	Q8TEU7	12.7961	12.7965	12.8151	13.1187	12.6963	12.7672	12.7985	12.7838	0.115557	0.0938165	no
-0.164373	0.765239	3.13e-09	0.171696	TRMT5		tRNA (guanine(37)-N1)-methyltransferase	Q32P41	13.1561	13.194	12.9441	13.0503	13.0597	13.1121	12.6157	12.8995	0.0770116	0.120282	no
0.200586	0.764937	3.13e-09	0.171816	CPQ		Carboxypeptidase Q	Q9Y646	11.6878	11.8093	11.7593	11.4988	12.1621	11.5539	12.0323	11.8093	0.0915113	0.159133	no
-0.22688	0.763857	3.13e-09	0.172244	NIPBL		Nipped-B-like protein	Q6KC79	10.2091	10.3695	10.3761	10.0971	10.1835	10.2934	9.73998	9.92738	0.0921288	0.145564	no
0.137333	0.763844	3.13e-09	0.172249	ENY2		Transcription and mRNA export factor ENY2	Q9NPA8	14.7157	14.777	14.7746	14.5623	15.0354	14.6081	14.9405	14.7948	0.0679456	0.110302	no
-0.113699	0.763498	3.13e-09	0.172386	BRMS1		Breast cancer metastasis-suppressor 1	Q9HCU9	11.1758	11.1981	11.2	11.1615	11.016	11.0614	11.0333	11.1699	0.0128196	0.0524772	no
-0.0634886	0.76347	3.13e-09	0.172397	NCAPD2		Condensin complex subunit 1	Q15021	14.44	14.4825	14.4398	14.5388	14.3872	14.4691	14.3936	14.3973	0.0327925	0.0365595	no
0.294711	0.763011	3.13e-09	0.172579	POLR1B		DNA-directed RNA polymerase I subunit RPA2	Q9H9Y6	11.3267	11.7022	11.0239	10.8028	11.7607	11.6648	11.2339	11.3751	0.276464	0.226743	no
-0.580453	0.761881	3.13e-09	0.173029	TLR4		Toll-like receptor 4	O00206	14.0853	13.8495	13.8548	14.7699	12.2951	14.1681	13.8195	13.955	0.334469	0.390352	no
-0.0776759	0.761819	3.13e-09	0.173054	ANAPC1		Anaphase-promoting complex subunit 1	Q9H1A4	13.4858	13.3825	13.4529	13.5745	13.4062	13.4165	13.3657	13.3966	0.0554951	0.0484474	no
0.496679	0.761115	3.13e-09	0.173334	HBG2		Hemoglobin subunit gamma-2	P69892	19.3597	19.3901	19.6351	18.1777	20.2751	19.2573	19.7862	19.2307	0.361594	0.3791	no
-0.077455	0.760859	3.13e-09	0.173437	THRAP3		Thyroid hormone receptor-associated protein 3	Q9Y2W1	14.0733	14.04	14.0713	14.0097	14.0582	14.0233	13.8675	13.9356	0.0207421	0.0491562	no
-0.699464	0.760838	3.13e-09	0.173445	HES1		Transcription factor HES-1	Q14469	13.7983	13.6553	13.3754	14.8029	11.8021	14.0362	13.3701	13.6257	0.490326	0.518053	no
-0.0986666	0.76071	3.13e-09	0.173496	SYMPK		Symplekin	Q92797	17.7435	17.6828	17.7087	17.7633	17.6662	17.793	17.586	17.4584	0.0248166	0.0727112	no
0.116107	0.760522	3.13e-09	0.173571	NPLOC4		Nuclear protein localization protein 4 homolog	Q8TAT6	14.947	15.0256	14.9855	15.0493	15.3049	14.9694	14.9802	15.2175	0.0311226	0.0944061	no
0.227313	0.760219	3.13e-09	0.173693	NSL1		Kinetochore-associated protein NSL1 homolog	Q96IY1	9.89404	10.2646	9.92848	9.76651	10.1749	10.4509	10.0287	10.1083	0.154341	0.155898	no
0.0779463	0.759919	3.13e-09	0.173812	PPP1R7		Protein phosphatase 1 regulatory subunit 7	Q15435	15.6914	15.7211	15.7352	15.7518	15.8847	15.6578	15.8527	15.8161	0.0176826	0.0556523	no
0.0736743	0.759288	3.13e-09	0.174065	HNRNPD		Heterogeneous nuclear ribonucleoprotein D0	Q14103	18.9134	18.9756	19.0075	18.9538	19.0917	18.9148	19.084	19.0545	0.0273335	0.0497802	no
0.219584	0.759177	3.13e-09	0.17411	SIN3A		Paired amphipathic helix protein Sin3a	Q96ST3	13.1796	13.3452	13.3763	13.0097	13.8802	13.1902	13.4478	13.2708	0.114303	0.196134	no
-0.187171	0.757934	3.13e-09	0.174609	RICTOR		Rapamycin-insensitive companion of mTOR	Q6R327	11.1582	10.9974	11.1746	11.0839	11.135	11.1068	10.6571	10.7664	0.0554581	0.126055	no
0.098592	0.757343	3.13e-09	0.174847	TXNRD2		Thioredoxin reductase 2, mitochondrial	Q9NNW7	16.144	16.1928	16.2658	16.1597	16.4561	16.1352	16.3227	16.2427	0.0379274	0.0780778	no
-0.160624	0.756595	3.13e-09	0.175148	KCTD1		BTB/POZ domain-containing protein KCTD1	Q719H9	11.4489	11.4487	11.703	11.5259	11.1459	11.3035	11.5205	11.5141	0.0856554	0.112226	no
-0.82832	0.755481	3.13e-09	0.175598	HROB		Homologous recombination OB-fold protein	Q8N3J3	12.0937	12.248	11.5832	13.7	10.0526	12.2367	11.81	12.2124	0.728616	0.723086	no
0.495915	0.755071	3.13e-09	0.175764	DSN1		Kinetochore-associated protein DSN1 homolog	Q9H410	12.6309	11.1244	12.8746	11.8699	12.8968	12.3933	12.5593	12.6339	0.484946	0.326747	no
0.0944907	0.754708	3.13e-09	0.175911	NAP1L4		Nucleosome assembly protein 1-like 4	Q99733	17.6581	17.6168	17.6967	17.5044	17.8412	17.6151	17.7701	17.6275	0.056639	0.0725024	no
-0.110879	0.753351	3.13e-09	0.176461	WDR11		WD repeat-containing protein 11	Q9BZH6	12.3258	12.33	12.247	12.4577	12.1407	12.1753	12.2213	12.3799	0.0611582	0.0749953	no
0.119998	0.753332	3.13e-09	0.176469	RPL14		60S ribosomal protein L14	P50914	18.2839	18.3315	18.3572	18.1099	18.6101	18.3433	18.3135	18.2956	0.0748129	0.0980637	no
-0.182741	0.753013	3.13e-09	0.176598	CXorf56		UPF0428 protein CXorf56	Q9H5V9	11.5226	11.5302	11.4176	11.7033	11.0869	11.4969	11.6053	11.2536	0.0833734	0.130912	no
-0.0663145	0.752186	3.13e-09	0.176935	SRSF3		Serine/arginine-rich splicing factor 3	P84103	16.3159	16.2448	16.331	16.4115	16.2106	16.268	16.3139	16.2454	0.0475246	0.0447294	no
-0.373751	0.751382	3.13e-09	0.177263	NOL11		Nucleolar protein 11	Q9H8H0	9.46062	10.0586	9.74528	9.98557	9.26386	9.79726	8.84147	9.85245	0.179429	0.254182	no
0.132303	0.751349	3.13e-09	0.177277	RPL24		60S ribosomal protein L24	P83731	16.6133	16.6169	16.7406	16.3792	16.9247	16.7099	16.6464	16.5983	0.101736	0.106917	no
0.195101	0.749933	3.13e-09	0.177855	RPS6KB1		Ribosomal protein S6 kinase beta-1	P23443	12.613	12.9709	12.9128	12.8937	12.818	13.4267	12.964	12.9621	0.105372	0.170315	yes
0.33577	0.748994	3.13e-09	0.17824	STXBP1		Syntaxin-binding protein 1	P61764	11.572	11.2529	11.5371	10.4898	11.8203	11.5802	11.3909	11.4035	0.299611	0.230615	no
-0.216248	0.748929	3.13e-09	0.178267	DYNLT3		Dynein light chain Tctex-type 3	P51808	10.9837	10.4533	10.6525	10.5358	10.1767	10.472	10.5836	10.5282	0.169653	0.162079	no
0.125406	0.74838	3.13e-09	0.178492	PYCR2		Pyrroline-5-carboxylate reductase 2	Q96C36	16.1725	16.3058	16.293	16.0669	16.5302	16.1372	16.3589	16.3135	0.0768469	0.102129	no
0.183652	0.747388	3.13e-09	0.178901	TRMT6		tRNA (adenine(58)-N(1))-methyltransferase non-catalytic subunit TRM6	Q9UJA5	12.3212	12.4935	12.4832	12.1835	12.8194	12.2278	12.5872	12.5818	0.100249	0.148152	no
0.186437	0.746845	3.13e-09	0.179124	UXT		Protein UXT	Q9UBK9	11.3015	11.2815	11.3482	11.0044	11.5319	11.1333	11.6372	11.3789	0.10249	0.139696	no
-0.114244	0.746624	3.13e-09	0.179215	ZADH2		Prostaglandin reductase 3	Q8N4Q0	12.7111	12.7605	12.7392	12.7093	12.5936	12.8214	12.4514	12.5968	0.017024	0.0799057	no
-0.105638	0.744653	3.13e-09	0.180031	DNAJC3		DnaJ homolog subfamily C member 3	Q13217	13.8324	13.9427	13.8082	13.9391	13.7583	13.9599	13.6352	13.7466	0.0486736	0.0785737	no
0.0676855	0.744359	3.13e-09	0.180153	EIF2S2		Eukaryotic translation initiation factor 2 subunit 2	P20042	16.1229	16.2249	16.1671	16.1399	16.3304	16.1625	16.2363	16.1964	0.0312028	0.0469913	no
0.152292	0.744129	3.13e-09	0.180248	DPP9		Dipeptidyl peptidase 9	Q86TI2	13.1368	12.7536	13.156	13.0678	13.3136	13.2939	13.0657	13.0501	0.122177	0.115663	no
0.104906	0.744055	3.13e-09	0.180279	MARK3		MAP/microtubule affinity-regulating kinase 3	P27448	12.8289	12.8418	12.7698	12.8535	12.9118	13.074	12.7537	12.9743	0.025493	0.0760138	yes
0.089936	0.743868	3.13e-09	0.180357	SRPK2		SRSF protein kinase 2	P78362	12.4832	12.5542	12.3882	12.556	12.5225	12.6542	12.5914	12.5733	0.0539766	0.0539699	yes
0.11235	0.743791	3.13e-09	0.180389	ABI1		Abl interactor 1	Q8IZP0	13.5224	13.5343	13.5711	13.412	13.8036	13.4426	13.6434	13.5997	0.0466759	0.0874593	no
0.192255	0.743702	3.13e-09	0.180425	GLUL		Glutamine synthetase	P15104	16.2193	16.2864	16.3706	16.0308	16.7645	16.082	16.4609	16.3689	0.0977389	0.167932	no
-0.1964	0.743363	3.13e-09	0.180566	PRKCQ		Protein kinase C theta type	Q04759	11.7826	11.7673	11.9454	11.7545	11.6357	12.0121	11.4107	11.4057	0.0637711	0.150757	yes
0.17041	0.743333	3.13e-09	0.180579	MAPKAPK2		MAP kinase-activated protein kinase 2	P49137	11.8455	11.9514	11.628	12.1386	12.2127	12.1362	11.9035	11.9928	0.146421	0.127546	yes
0.115023	0.742255	3.13e-09	0.181028	GTF2H2;GTF2H2C		General transcription factor IIH subunit 2;General transcription factor IIH subunit 2-like protein	Q13888;Q6P1K8	11.5162	11.6077	11.621	11.6618	11.8825	11.6534	11.6714	11.6595	0.0420666	0.0743679	no
-0.0849678	0.741757	3.13e-09	0.181236	RPL10A		60S ribosomal protein L10a	P62906	17.7321	17.6397	17.6111	17.6658	17.535	17.7422	17.5075	17.5242	0.0361465	0.0638427	no
0.126564	0.741596	3.13e-09	0.181303	TUBG1		Tubulin gamma-1 chain	P23258	13.9533	14.045	14.0729	13.8048	14.3192	13.9867	14.0123	14.064	0.0817814	0.103001	no
0.193972	0.741374	3.13e-09	0.181395	PLBD2		Putative phospholipase B-like 2	Q8NHP8	14.9867	15.1055	15.1786	14.6905	15.4495	14.9038	15.2846	15.0993	0.141807	0.159864	no
-0.156306	0.740466	3.13e-09	0.181775	MAP7D3		MAP7 domain-containing protein 3	Q8IWC1	11.2533	11.0172	10.9562	11.1613	10.7598	11.0436	10.9016	11.0577	0.0939714	0.104836	no
-0.141963	0.740317	3.13e-09	0.181837	HDLBP		Vigilin	Q00341	14.7086	14.5663	14.7096	14.5782	14.3489	14.7713	14.3157	14.5589	0.0547942	0.112182	no
0.220322	0.738973	3.13e-09	0.182401	AIFM1		Apoptosis-inducing factor 1, mitochondrial	O95831	10.2645	10.027	10.0309	9.95665	9.94013	10.4437	10.4976	10.2788	0.0964306	0.155373	no
0.0775119	0.738821	3.13e-09	0.182465	SYNCRIP		Heterogeneous nuclear ribonucleoprotein Q	O60506	17.8373	17.8647	17.9068	17.7801	18.0554	17.89	17.915	17.8385	0.0366912	0.0578857	no
0.21802	0.738649	3.13e-09	0.182537	HRC		Sarcoplasmic reticulum histidine-rich calcium-binding protein	P23327	11.1658	11.8274	11.7872	11.6299	11.7531	11.6334	11.9327	11.9631	0.192467	0.15759	no
-0.277374	0.737974	3.13e-09	0.182821	SBF1		Myotubularin-related protein 5	O95248	10.4214	10.6174	10.4485	10.5005	9.97543	10.6655	9.79337	10.444	0.0612073	0.193512	no
0.208399	0.737565	3.13e-09	0.182993	MED20		Mediator of RNA polymerase II transcription subunit 20	Q9H944	12.9015	12.9733	13.0118	12.4112	13.283	12.9238	13.0715	12.8531	0.175976	0.160777	no
0.167402	0.736822	3.13e-09	0.183307	ACTN1		Alpha-actinin-1	P12814	18.2173	18.3563	18.4106	18.2427	18.7031	18.1078	18.5877	18.4981	0.0638956	0.140274	no
-0.277104	0.736782	3.13e-09	0.183324	BICRA		BRD4-interacting chromatin-remodeling complex-associated protein	Q9NZM4	9.15577	9.23635	9.06496	9.39854	8.64462	9.23355	8.90053	8.96849	0.09966	0.157416	no
-0.116574	0.736432	3.13e-09	0.183471	MRPS5		28S ribosomal protein S5, mitochondrial	P82675	13.1964	13.0964	13.1522	13.1757	12.9864	13.28	12.9237	12.9642	0.0296742	0.087496	no
-0.0645866	0.736265	3.13e-09	0.183542	HNRNPF		Heterogeneous nuclear ribonucleoprotein F	P52597	16.4004	16.3035	16.3674	16.449	16.2799	16.3903	16.2866	16.3051	0.0421887	0.0436218	no
0.156851	0.736233	3.13e-09	0.183555	POLR3K		DNA-directed RNA polymerase III subunit RPC10	Q9Y2Y1	10.7834	11.0855	10.8885	11.1817	11.1932	11.1457	11.0227	11.205	0.12522	0.103151	no
-0.299172	0.735604	3.13e-09	0.183821	CRYL1		Lambda-crystallin homolog	Q9Y2S2	10.3165	10.8616	10.855	11.1972	10.0994	10.7091	10.7331	10.4919	0.239208	0.235583	no
-0.0585268	0.735502	3.13e-09	0.183865	CCAR2		Cell cycle and apoptosis regulator protein 2	Q8N163	14.9717	14.9531	14.9931	15.0127	14.8844	14.9937	14.8871	14.9312	0.0179463	0.033655	no
-0.147783	0.735323	3.13e-09	0.18394	RNF25		E3 ubiquitin-protein ligase RNF25	Q96BH1	11.3822	11.5822	11.6353	11.5682	11.2172	11.2935	11.5517	11.5144	0.0741475	0.101827	no
0.0801526	0.732898	3.13e-09	0.18497	S100A13		Protein S100-A13	Q99584	15.7636	15.7468	15.771	15.8451	15.8515	15.7186	15.9525	15.9245	0.0305152	0.0599268	no
-0.232985	0.732844	3.13e-09	0.184993	KNTC1		Kinetochore-associated protein 1	P50748	12.2767	12.3008	12.5517	13.016	12.1115	12.4799	12.3864	12.2353	0.2547	0.215749	no
0.11038	0.732803	3.13e-09	0.185011	SNX4		Sorting nexin-4	O95219	12.7437	12.7961	12.6743	12.6936	12.9887	12.6738	12.7699	12.9167	0.0380753	0.0825845	no
-0.0753719	0.732669	3.13e-09	0.185068	EIF5B		Eukaryotic translation initiation factor 5B	O60841	15.8463	15.8817	15.87	15.9199	15.7064	15.9403	15.7724	15.7974	0.0213704	0.0539367	no
0.497746	0.732544	3.13e-09	0.185121	OSBP2		Oxysterol-binding protein 2	Q969R2	8.4751	7.23681	7.72732	7.43738	8.21041	8.16254	7.99201	8.50264	0.413027	0.301467	no
0.117174	0.732428	3.13e-09	0.185171	GPX4		Phospholipid hydroperoxide glutathione peroxidase	P36969	16.0409	16.0496	16.1574	15.951	16.3303	15.9661	16.2691	16.102	0.0588278	0.0965972	no
0.346542	0.732224	3.13e-09	0.185258	DCTD		Deoxycytidylate deaminase	P32321	13.0645	12.9731	13.4203	12.2834	13.7511	12.9789	13.2965	13.1009	0.301915	0.279415	no
-0.197971	0.731973	3.13e-09	0.185365	ZBED1		Zinc finger BED domain-containing protein 1	O96006	11.1246	11.1525	11.2343	11.0015	10.7384	11.2209	11.0972	10.6644	0.0661591	0.14078	no
0.12973	0.731597	3.13e-09	0.185525	TTI1		TELO2-interacting protein 1 homolog	O43156	12.6302	12.5199	12.6869	12.3764	12.7417	12.8215	12.6541	12.515	0.0931649	0.097245	no
0.142242	0.731506	3.13e-09	0.185564	CRKL		Crk-like protein	P46109	19.2746	19.4052	19.4401	19.2897	19.6856	19.1934	19.5901	19.5096	0.0573081	0.117409	no
-0.165863	0.731135	3.13e-09	0.185723	ARHGAP15		Rho GTPase-activating protein 15	Q53QZ3	10.7331	10.7633	10.6974	10.8448	10.4837	10.8605	10.4392	10.5919	0.0440068	0.107098	no
0.0697855	0.731042	3.13e-09	0.185763	PPA1		Inorganic pyrophosphatase	Q15181	17.5939	17.5392	17.6918	17.5021	17.6957	17.6013	17.6706	17.6385	0.0578739	0.0486768	no
0.129699	0.730767	3.13e-09	0.18588	MRPL39		39S ribosomal protein L39, mitochondrial	Q9NYK5	13.4426	13.1057	13.3117	13.4233	13.3234	13.5596	13.5561	13.3629	0.103376	0.0995123	no
0.143416	0.730711	3.13e-09	0.185904	NT5C		5'(3')-deoxyribonucleotidase, cytosolic type	Q8TCD5	14.5756	14.6219	14.7206	14.4227	14.9583	14.4877	14.7749	14.6937	0.0848245	0.119912	no
-0.0989986	0.730218	3.13e-09	0.186115	FKBP15		FK506-binding protein 15	Q5T1M5	13.8	13.757	13.6915	13.9322	13.561	13.7904	13.6946	13.7386	0.0715719	0.0740521	no
0.157908	0.728829	3.13e-09	0.186712	MLLT11		Protein AF1q	Q13015	11.3766	11.3248	11.047	11.2052	11.4444	11.4603	11.1625	11.5181	0.0992835	0.111668	no
-0.213369	0.728347	3.13e-09	0.186919	SORBS3		Vinexin	O60504	9.82233	10.3178	10.4292	10.233	10.0162	9.97422	10.0178	9.94058	0.170918	0.148617	no
0.0755822	0.728233	3.13e-09	0.186968	GLOD4		Glyoxalase domain-containing protein 4	Q9HC38	16.5468	16.5714	16.5883	16.4712	16.7499	16.5463	16.6195	16.5643	0.0354012	0.0569581	no
-0.10574	0.727702	3.13e-09	0.187197	POLD2		DNA polymerase delta subunit 2	P49005	13.8129	13.7363	13.7311	13.6432	13.5702	13.8304	13.5749	13.525	0.0479723	0.0805718	no
0.273343	0.72717	3.13e-09	0.187426	RFX5		DNA-binding protein RFX5	P48382	9.30489	9.30055	9.19236	8.71017	9.48471	9.40137	9.50703	9.20822	0.178251	0.156945	no
0.105706	0.726877	3.13e-09	0.187553	FGFR1OP		FGFR1 oncogene partner	O95684	12.2196	12.223	12.2394	12.26	12.2879	12.1958	12.5024	12.3787	0.0128488	0.074653	no
0.0719689	0.726866	3.13e-09	0.187557	GAMT		Guanidinoacetate N-methyltransferase	Q14353	14.3819	14.3363	14.3949	14.2187	14.377	14.3798	14.4582	14.4048	0.0544294	0.04697	no
0.0627195	0.72667	3.13e-09	0.187642	RPS19		40S ribosomal protein S19	P39019	18.2447	18.2718	18.314	18.2146	18.404	18.3399	18.2742	18.2779	0.029321	0.041494	no
-0.208107	0.726515	3.13e-09	0.187709	TOM1L2		TOM1-like protein 2	Q6ZVM7	11.1112	11.3307	11.129	11.3419	11.1703	11.3505	10.7718	10.7878	0.0865657	0.153879	no
0.173599	0.725094	3.13e-09	0.188324	KHDC4		KH homology domain-containing protein 4	Q7Z7F0	12.2835	12.3869	11.8529	11.9415	12.1828	12.2955	12.3753	12.3056	0.178533	0.130547	no
-0.0612245	0.724509	3.13e-09	0.188578	TDP2		Tyrosyl-DNA phosphodiesterase 2	O95551	14.2374	14.2105	14.2366	14.3136	14.174	14.2443	14.1684	14.1665	0.031224	0.0351652	no
0.232526	0.724506	3.13e-09	0.188579	THG1L		Probable tRNA(His) guanylyltransferase	Q9NWX6	12.3546	12.2716	12.3919	11.6515	12.5794	12.4598	12.3493	12.2112	0.213152	0.168983	no
0.538901	0.724506	3.13e-09	0.188579	SRSF7		Serine/arginine-rich splicing factor 7	Q16629	12.5696	12.5342	13.0269	11.6837	14.032	12.6009	12.9631	12.374	0.349835	0.541795	no
-0.169704	0.724221	3.13e-09	0.188703	PACSIN3		Protein kinase C and casein kinase substrate in neurons protein 3	Q9UKS6	11.7081	11.5875	11.7128	11.6442	11.3757	11.859	11.3744	11.3648	0.0408133	0.129854	no
-0.320085	0.724141	3.13e-09	0.188738	CEP131		Centrosomal protein of 131 kDa	Q9UPN4	9.14173	9.44082	8.97029	9.06521	9.08042	8.69121	8.4347	9.13136	0.14719	0.201734	no
0.178259	0.723991	3.13e-09	0.188803	DPH6		Diphthine--ammonia ligase	Q7L8W6	11.0109	10.662	10.9304	10.8484	10.7504	11.1778	11.11	11.1265	0.101061	0.127301	no
0.0622931	0.723804	3.13e-09	0.188884	GET4		Golgi to ER traffic protein 4 homolog	Q7L5D6	15.5043	15.4753	15.5681	15.4574	15.5886	15.6298	15.5215	15.5145	0.0339681	0.0409015	no
0.181819	0.722166	3.13e-09	0.189598	MCAT		Malonyl-CoA-acyl carrier protein transacylase, mitochondrial	Q8IVS2	12.36	12.4591	12.4155	11.8557	12.4952	12.5312	12.4144	12.3769	0.176559	0.129336	no
0.142911	0.721972	3.13e-09	0.189683	RFX1		MHC class II regulatory factor RFX1	P22670	11.8731	11.9306	12.0973	11.6605	11.8978	12.0252	12.1351	12.0751	0.123481	0.103606	no
-0.28081	0.721731	3.13e-09	0.189788	CAMSAP1		Calmodulin-regulated spectrin-associated protein 1	Q5T5Y3	12.5199	12.4471	12.5402	13.103	11.8767	12.6726	12.3321	12.6056	0.229705	0.236918	no
-0.121051	0.721545	3.13e-09	0.18987	TWF2		Twinfilin-2	Q6IBS0	15.2193	15.2343	15.2393	15.3182	15.1678	15.1905	14.8636	15.3049	0.031225	0.0913628	no
0.281056	0.721493	3.13e-09	0.189892	UQCC2		Ubiquinol-cytochrome-c reductase complex assembly factor 2	Q9BRT2	11.2492	10.4212	10.9649	11.2284	11.1012	11.307	11.5584	11.0213	0.241033	0.211561	no
-0.218382	0.721354	3.13e-09	0.189953	UBE3D		E3 ubiquitin-protein ligase E3D	Q7Z6J8	10.9373	10.8624	10.9339	11.4671	10.5954	10.8713	10.8462	11.0144	0.211248	0.186255	no
0.112342	0.72063	3.13e-09	0.19027	ZFYVE16		Zinc finger FYVE domain-containing protein 16	Q7Z3T8	12.7639	12.878	12.8636	12.7289	13.0452	12.7153	12.9732	12.9501	0.0508113	0.0841589	no
0.217443	0.720387	3.13e-09	0.190376	PROSER2		Proline and serine-rich protein 2	Q86WR7	10.9233	10.3593	10.6749	10.8917	10.9445	10.6566	11.0142	11.1036	0.170741	0.1576	no
0.0814943	0.720282	3.13e-09	0.190422	RPL3		60S ribosomal protein L3	P39023	16.8815	16.9187	16.9152	16.7327	17.033	16.9775	16.9195	16.8441	0.0591831	0.0611071	no
0.13398	0.720278	3.13e-09	0.190424	FAM83A		Protein FAM83A	Q86UY5	11.6793	11.6951	11.5158	11.5852	11.9003	11.8623	11.6923	11.5562	0.0578311	0.097338	no
0.333279	0.720071	3.13e-09	0.190515	HACL1		2-hydroxyacyl-CoA lyase 1	Q9UJ83	10.05	9.53747	10.4518	10.4198	10.2431	10.1234	10.6548	10.7709	0.269367	0.249975	no
0.415145	0.719899	3.13e-09	0.19059	KIAA1210		Acrosomal protein KIAA1210	Q9ULL0	7.49709	8.28257	7.98244	8.5513	8.35282	8.54326	8.69843	8.37946	0.29622	0.232968	no
-0.0938212	0.719864	3.13e-09	0.190606	PCCB		Propionyl-CoA carboxylase beta chain, mitochondrial	P05166	13.1514	12.9862	12.9411	13.1339	12.8689	12.9638	12.9957	13.0089	0.0726839	0.0664477	no
0.0824161	0.719017	3.13e-09	0.190978	EIF4E		Eukaryotic translation initiation factor 4E	P06730	16.7035	16.7599	16.7617	16.6012	16.9315	16.7358	16.7535	16.7352	0.0512448	0.0642362	no
-0.204788	0.718999	3.13e-09	0.190986	USP32		Ubiquitin carboxyl-terminal hydrolase 32	Q8NFA0	11.4259	11.2041	11.3356	11.1013	11.0881	11.4384	10.9147	10.8067	0.0987881	0.157214	no
-0.116237	0.718945	3.13e-09	0.19101	CASP8		Caspase-8	Q14790	12.8825	12.7035	12.7237	12.8652	12.7707	12.8201	12.5356	12.5837	0.0644901	0.0857193	no
0.919901	0.718699	3.13e-09	0.191118	STX2		Syntaxin-2	P32856	8.86489	6.9271	6.98404	5.55066	8.36066	7.9299	7.53448	8.18126	0.985068	0.595944	no
0.11129	0.717236	3.13e-09	0.191763	XIAP		E3 ubiquitin-protein ligase XIAP	P98170	13.2853	13.383	13.4664	13.3556	13.6013	13.2702	13.5652	13.4987	0.0520618	0.0861905	no
-0.116848	0.717204	3.13e-09	0.191777	ITSN2		Intersectin-2	Q9NZM3	12.7136	12.742	12.8477	12.7014	12.57	12.449	12.7914	12.727	0.0469982	0.0847602	no
-0.512736	0.716393	3.13e-09	0.192135	SCLT1		Sodium channel and clathrin linker 1	Q96NL6	13.2446	13.0681	12.8956	13.771	11.589	13.3443	12.7673	13.2277	0.281085	0.357299	no
-0.159088	0.716371	3.13e-09	0.192145	PDCD2L		Programmed cell death protein 2-like	Q9BRP1	12.8538	12.5889	12.9937	12.7023	12.489	12.8764	12.6389	12.4982	0.12283	0.130781	no
0.121814	0.716356	3.13e-09	0.192152	GAPDH		Glyceraldehyde-3-phosphate dehydrogenase	P04406	21.932	21.8829	22.0254	21.7671	22.1307	21.8328	22.1512	21.98	0.0740911	0.0948891	no
0.287863	0.71609	3.13e-09	0.192269	KATNAL1		Katanin p60 ATPase-containing subunit A-like 1	Q9BW62	12.1859	12.1259	12.2962	11.2772	12.4079	12.1266	12.3077	12.1945	0.274688	0.19713	no
-0.463007	0.716021	3.13e-09	0.1923	DXO		Decapping and exoribonuclease protein	O77932	9.16925	9.39424	9.48477	10.1646	9.47683	9.69455	8.44568	8.74376	0.325466	0.363838	no
0.288802	0.716001	3.13e-09	0.192309	MT2A		Metallothionein-2	P02795	9.4864	9.481	9.62709	9.25457	10.0107	9.31663	10.1021	9.57483	0.104455	0.223204	no
-0.065534	0.715784	3.13e-09	0.192405	BZW1		Basic leucine zipper and W2 domain-containing protein 1	Q7L1Q6	15.921	15.9481	15.8613	15.9522	15.8211	15.9593	15.7922	15.8478	0.0287483	0.0450669	no
0.140417	0.715764	3.13e-09	0.192414	ADD3		Gamma-adducin	Q9UEY8	13.5254	13.4883	13.6678	13.1554	13.6718	13.5544	13.6223	13.5501	0.143277	0.105353	no
-0.246812	0.71562	3.13e-09	0.192477	DOCK11		Dedicator of cytokinesis protein 11	Q5JSL3	12.6381	12.4493	12.2926	12.8051	11.9251	12.7547	12.1832	12.3349	0.154415	0.203797	no
0.069691	0.715597	3.13e-09	0.192488	SBDS		Ribosome maturation protein SBDS	Q9Y3A5	17.1061	17.0818	17.1256	17.0928	17.3018	17.0955	17.1733	17.1146	0.013083	0.0522717	no
-0.0914824	0.713928	3.13e-09	0.193229	NUMB		Protein numb homolog	P49757	12.9262	13.0391	13.0203	13.1974	12.952	12.945	12.9149	13.0051	0.0792087	0.0660721	no
-0.0965957	0.713703	3.13e-09	0.193329	ALDH18A1		Delta-1-pyrroline-5-carboxylate synthase	P54886	13.9543	13.8544	13.9608	13.9639	13.8107	14.015	13.6993	13.8219	0.0359299	0.0722428	yes
-0.133435	0.712414	3.13e-09	0.193904	GLS		Glutaminase kidney isoform, mitochondrial	O94925	11.9119	11.9406	11.847	11.9198	11.8234	11.9793	11.5428	11.7401	0.0277483	0.0927674	no
0.294175	0.712399	3.13e-09	0.19391	MZT2A		Mitotic-spindle organizing protein 2A	Q6P582	9.99229	9.88201	10.5659	10.4249	10.4896	10.5553	10.8918	10.105	0.227363	0.234178	no
0.145432	0.712375	3.13e-09	0.193921	TCF3		Transcription factor E2-alpha	P15923	11.4711	11.6185	11.6137	11.2773	11.7773	11.4735	11.6716	11.64	0.107719	0.103831	no
0.0758891	0.712218	3.13e-09	0.193991	MPP1		55 kDa erythrocyte membrane protein	Q00013	16.4991	16.4801	16.524	16.3807	16.6003	16.6263	16.5343	16.4266	0.042824	0.0567634	no
-0.0680895	0.711774	3.13e-09	0.19419	WDR5		WD repeat-containing protein 5	P61964	14.6793	14.6331	14.6362	14.7875	14.5532	14.6556	14.6234	14.6316	0.0509321	0.0467971	no
0.398741	0.710978	3.13e-09	0.194546	BMI1		Polycomb complex protein BMI-1	P35226	8.46736	8.71585	8.56946	9.33113	9.32993	9.48988	9.3153	8.54365	0.294756	0.29234	no
0.242637	0.710098	3.13e-09	0.19494	RIOK3		Serine/threonine-protein kinase RIO3	O14730	11.736	11.5493	11.8173	11.4687	12.2867	11.4156	12.0175	11.8219	0.111665	0.212358	yes
0.106781	0.709406	3.13e-09	0.195251	ISY1		Pre-mRNA-splicing factor ISY1 homolog	Q9ULR0	12.7678	12.818	12.9214	12.8533	13.1264	12.8989	12.9643	12.7979	0.0449078	0.0825539	no
-0.0590025	0.708843	3.13e-09	0.195505	PSMG2		Proteasome assembly chaperone 2	Q969U7	15.8211	15.8207	15.8283	15.8302	15.7454	15.6868	15.8509	15.7812	0.00337212	0.0374179	no
-0.366761	0.708736	3.13e-09	0.195553	PAPOLG		Poly(A) polymerase gamma	Q9BWT3	9.24325	9.06682	8.8851	8.80367	9.06263	8.94032	8.12681	8.40204	0.13791	0.232721	no
-0.099683	0.708391	3.13e-09	0.195708	PC		Pyruvate carboxylase, mitochondrial	P11498	12.8815	12.8522	12.8765	12.916	12.7889	12.9639	12.6548	12.7198	0.0182733	0.0705091	no
-0.320735	0.708353	3.13e-09	0.195725	WDR43		WD repeat-containing protein 43	Q15061	12.3812	12.7144	12.5379	13.5836	12.3037	12.5338	12.5005	12.5962	0.421242	0.349513	no
-0.334256	0.708278	3.13e-09	0.195759	RACGAP1		Rac GTPase-activating protein 1	Q9H0H5	10.3227	10.2699	10.1123	9.89637	10.2297	10.2454	9.33006	9.45908	0.128446	0.238929	no
0.0554451	0.708092	3.13e-09	0.195843	RAB5A		Ras-related protein Rab-5A	P20339	16.6404	16.6299	16.7018	16.6435	16.7159	16.6427	16.7698	16.709	0.0227389	0.0348913	no
0.150433	0.706589	3.13e-09	0.196522	MRPL35		39S ribosomal protein L35, mitochondrial	Q9NZE8	11.2006	11.335	11.3273	11.1024	11.6237	11.4278	11.2863	11.2293	0.0760834	0.113752	no
0.180003	0.705712	3.13e-09	0.196919	S100A1		Protein S100-A1	P23297	10.2958	10.6609	10.6264	10.7508	10.8497	10.5529	10.819	10.8322	0.130199	0.121557	no
-0.207934	0.704634	3.13e-09	0.197409	ILRUN		Protein ILRUN	Q9H6K1	10.9157	11.1307	10.842	10.8799	11.0289	10.6579	10.3732	10.8766	0.0929255	0.151371	no
0.920829	0.704499	3.13e-09	0.19747	SKP2		S-phase kinase-associated protein 2	Q13309	10.8374	10.7676	10.8805	10.5515	11.0109	10.9565	14.0842	10.6687	0.0975302	1.46784	no
0.116075	0.702838	3.13e-09	0.198226	AK1		Adenylate kinase isoenzyme 1	P00568	16.442	16.3796	16.5407	16.2281	16.7114	16.4508	16.4982	16.3942	0.0896468	0.0980469	yes
0.10519	0.701236	3.13e-09	0.198959	CCDC93		Coiled-coil domain-containing protein 93	Q567U6	13.2595	13.5071	13.5897	13.5438	13.5039	13.6159	13.6351	13.5659	0.0978463	0.0771705	no
-0.281431	0.701197	3.13e-09	0.198977	FARS2		Phenylalanine--tRNA ligase, mitochondrial	O95363	10.6713	10.2035	10.6806	10.377	10.2811	10.7013	9.93346	9.89074	0.158275	0.220327	no
-0.256252	0.701129	3.13e-09	0.199008	NMT2		Glycylpeptide N-tetradecanoyltransferase 2	O60551	12.372	11.8852	12.1876	12.3559	11.5822	12.398	11.7088	12.0867	0.148366	0.208159	no
-0.418612	0.700822	3.13e-09	0.199149	TMEM164		Transmembrane protein 164	Q5U3C3	14.5168	14.3473	14.351	14.7608	13.0396	14.6464	14.246	14.3694	0.139911	0.275981	no
0.120812	0.700337	3.13e-09	0.199371	RRM2B		Ribonucleoside-diphosphate reductase subunit M2 B	Q7LG56	12.1095	12.3657	12.2988	12.3743	12.3327	12.2722	12.523	12.5037	0.0823976	0.0900274	no
-0.254651	0.700216	3.13e-09	0.199427	PLCL1		Inactive phospholipase C-like protein 1	Q15111	10.5137	10.4359	10.7781	10.5785	9.81686	10.6925	10.4076	10.3706	0.104241	0.181201	no
0.140321	0.7	3.13e-09	0.199526	WDR59		GATOR complex protein WDR59	Q6PJI9	11.7573	11.8458	11.6824	11.6106	11.7461	12.0804	11.6951	11.9358	0.0701561	0.110201	no
0.0693432	0.699907	3.13e-09	0.199569	DCAF8		DDB1- and CUL4-associated factor 8	Q5TAQ9	12.9023	12.814	12.8977	12.8776	12.9588	12.8852	12.9484	12.9766	0.0278805	0.036211	no
-0.14386	0.699751	3.13e-09	0.19964	STX10		Syntaxin-10	O60499	11.3154	11.5316	11.2015	11.39	11.0451	11.1785	11.3622	11.2773	0.0964761	0.103049	no
0.139976	0.699401	3.13e-09	0.199802	UBQLN4		Ubiquilin-4	Q9NRR5	15.5123	15.6078	15.6739	15.4941	15.863	15.3851	15.8157	15.7843	0.0587646	0.118037	no
-0.117607	0.697998	3.13e-09	0.200448	POLE2		DNA polymerase epsilon subunit 2	P56282	12.3934	12.3157	12.3444	12.5637	12.1812	12.4578	12.1997	12.308	0.0791674	0.0892703	no
-0.113774	0.697499	3.13e-09	0.200678	NUMA1		Nuclear mitotic apparatus protein 1	Q14980	13.9553	13.9917	13.939	14.2816	13.8127	13.9362	13.961	14.0026	0.117567	0.0978804	no
0.106274	0.697101	3.13e-09	0.200863	G3BP2		Ras GTPase-activating protein-binding protein 2	Q9UN86	13.569	13.5998	13.722	13.4293	13.7861	13.7761	13.6058	13.5771	0.0829527	0.0833183	no
0.317804	0.696732	3.13e-09	0.201033	GXYLT1		Glucoside xylosyltransferase 1	Q4G148	8.90411	8.58377	8.67711	8.88505	9.4231	9.23139	9.08807	8.57868	0.10799	0.220722	no
0.294152	0.696372	3.13e-09	0.2012	RABEPK		Rab9 effector protein with kelch motifs	Q7Z6M1	12.9629	13.2017	13.8043	12.5874	13.4479	13.3685	13.5089	13.4077	0.368905	0.239588	no
0.22253	0.696278	3.13e-09	0.201243	FBXO3		F-box only protein 3	Q9UK99	11.4131	11.4594	11.4499	11.2531	12.0243	11.1806	11.5437	11.7171	0.064572	0.198253	no
0.192403	0.695809	3.13e-09	0.201461	CHMP3		Charged multivesicular body protein 3	Q9Y3E7	12.1187	12.2455	12.6451	12.179	12.7461	12.2856	12.585	12.3412	0.175974	0.165901	no
0.11684	0.695781	3.13e-09	0.201474	PHKA2		Phosphorylase b kinase regulatory subunit alpha, liver isoform	P46019	12.8532	13.0197	12.9282	13.155	13.0753	13.2229	12.9457	13.1795	0.0911303	0.091724	yes
0.11913	0.695688	3.13e-09	0.201517	TMPO		Lamina-associated polypeptide 2, isoforms beta/gamma	P42167	12.4603	12.6673	12.7668	12.4243	12.6628	12.6361	12.7936	12.7026	0.114525	0.0896255	no
0.105542	0.695385	3.13e-09	0.201658	TSSC4		Protein TSSC4	Q9Y5U2	12.483	12.2546	12.5259	12.2814	12.5462	12.4537	12.5032	12.464	0.0956052	0.0737773	no
0.0599429	0.695216	3.13e-09	0.201736	AP3B1		AP-3 complex subunit beta-1	O00203	14.71	14.686	14.7118	14.6398	14.7952	14.7968	14.7101	14.6853	0.0230383	0.0378368	no
-0.678897	0.694629	3.13e-09	0.202009	AASDH		Beta-alanine-activating enzyme	Q4L235	9.68229	9.46952	10.7163	9.67499	7.72553	9.77772	9.99973	9.32451	0.44946	0.487524	no
0.114591	0.694216	3.13e-09	0.202201	MRPL42		39S ribosomal protein L42, mitochondrial	Q9Y6G3	11.0887	11.1909	11.2214	11.0512	11.3674	11.2325	11.1881	11.2226	0.0561337	0.0669925	no
0.0583334	0.693635	3.13e-09	0.202472	GALM		Aldose 1-epimerase	Q96C23	15.9905	15.9771	15.9735	15.897	16.1017	15.9923	15.9815	15.996	0.0289498	0.0389956	no
0.185473	0.693349	3.13e-09	0.202606	MLLT1		Protein ENL	Q03111	11.6362	11.9455	11.7067	11.564	12.2613	11.7213	11.864	11.7477	0.118849	0.164803	no
0.0840217	0.693008	3.13e-09	0.202765	MINDY3		Ubiquitin carboxyl-terminal hydrolase MINDY-3	Q9H8M7	13.987	14.0299	14.035	13.9357	14.1662	13.9309	14.1632	14.0632	0.0317196	0.063289	no
0.116749	0.692193	3.13e-09	0.203145	NUP50		Nuclear pore complex protein Nup50	Q9UKX7	13.5844	13.8033	13.8316	13.8142	13.974	13.6586	13.9506	13.9173	0.0776031	0.0929218	no
0.0882993	0.691735	3.13e-09	0.20336	OAT		Ornithine aminotransferase, mitochondrial	P04181	16.7114	16.7649	16.7599	16.6021	16.9425	16.8409	16.6922	16.7159	0.0513979	0.0722037	no
-0.586103	0.691463	3.13e-09	0.203487	ACSF2		Medium-chain acyl-CoA ligase ACSF2, mitochondrial	Q96CM8	9.18449	9.5589	8.92348	9.8407	9.13665	9.23803	9.32993	7.45855	0.278433	0.362097	no
-0.0843871	0.690864	3.13e-09	0.203768	RPL6		60S ribosomal protein L6	Q02878	17.885	17.8384	17.8226	17.8453	17.7696	17.9327	17.7242	17.6272	0.0184875	0.0656042	no
0.193963	0.689596	3.13e-09	0.204364	TSEN54		tRNA-splicing endonuclease subunit Sen54	Q7Z6J9	10.9332	10.5874	11.255	10.843	11.164	11.1147	11.1778	10.9379	0.193854	0.145394	no
-0.281911	0.689585	3.13e-09	0.204369	HAUS5		HAUS augmin-like complex subunit 5	O94927	12.6143	12.4163	12.2527	12.8787	12.2132	12.8258	12.1485	11.8469	0.190126	0.245392	no
0.17323	0.689408	3.13e-09	0.204452	TOR1AIP1		Torsin-1A-interacting protein 1	Q5JTV8	12.032	12.152	12.0191	11.7331	11.9689	12.134	12.4687	12.0575	0.118159	0.147847	no
-0.0847687	0.689148	3.13e-09	0.204575	ERCC3		General transcription and DNA repair factor IIH helicase subunit XPB	P19447	15.6926	15.7377	15.7721	15.7921	15.6499	15.4965	15.777	15.732	0.0300618	0.0643728	no
0.15878	0.689109	3.13e-09	0.204593	AKR7A2		Aflatoxin B1 aldehyde reductase member 2	O43488	14.4423	14.4707	14.6172	14.1919	14.8959	14.533	14.47	14.4583	0.119161	0.142065	no
0.0882876	0.688791	3.13e-09	0.204743	H1-5		Histone H1.5	P16401	16.7773	16.869	16.8275	16.7486	17.0705	16.7615	16.8761	16.8674	0.0370901	0.0741925	no
0.286998	0.688625	3.13e-09	0.204821			HERV-H_2q24.3 provirus ancestral Env polyprotein	Q9N2K0	10.5033	10.9186	11.1374	11.6259	11.236	11.322	11.528	11.2472	0.32728	0.225871	no
-0.101071	0.688126	3.13e-09	0.205057	PRPF38A		Pre-mRNA-splicing factor 38A	Q8NAV1	12.9936	13.0164	13.0727	13.0765	12.8657	13.1382	12.8195	12.9314	0.0285457	0.0755737	no
0.127009	0.687684	3.13e-09	0.205265	DCTN4		Dynactin subunit 4	Q9UJW0	13.8263	13.8602	13.934	13.6609	14.1258	13.7256	14.0366	13.9013	0.0782227	0.106452	no
-0.188284	0.686468	3.13e-09	0.205841	HMCES		Abasic site processing protein HMCES	Q96FZ2	12.1968	12.4182	12.3474	12.2086	11.9405	12.4884	11.8177	12.1712	0.0752846	0.15346	no
-0.137092	0.685974	3.13e-09	0.206075	IFI30		Gamma-interferon-inducible lysosomal thiol reductase	P13284	13.5944	13.7537	13.855	13.5359	13.5011	13.3852	13.509	13.7954	0.101768	0.116228	no
-0.213624	0.685145	3.13e-09	0.206469	NEK3		Serine/threonine-protein kinase Nek3	P51956	12.1797	12.2404	12.1077	12.6643	11.7116	12.264	12.0846	12.2775	0.185743	0.184308	yes
0.0953187	0.685113	3.13e-09	0.206484	NUP58		Nucleoporin p58/p45	Q9BVL2	13.1946	13.3007	13.3145	13.1609	13.3545	13.1702	13.3986	13.4287	0.0528528	0.0719823	no
0.107099	0.684752	3.13e-09	0.206656	DAZAP1		DAZ-associated protein 1	Q96EP5	15.5473	15.5804	15.6794	15.5827	15.8518	15.4839	15.8156	15.6669	0.0400614	0.0910956	no
-0.0974693	0.684562	3.13e-09	0.206746	DDX54		ATP-dependent RNA helicase DDX54	Q8TDD1	13.0696	13.0725	12.9534	13.1363	12.908	13.1199	12.8466	12.9674	0.0521308	0.0723794	no
0.0819817	0.684332	3.13e-09	0.206856	RRM2		Ribonucleoside-diphosphate reductase subunit M2	P31350	16.5517	16.6352	16.5806	16.5576	16.6879	16.4851	16.7342	16.7458	0.0266273	0.0652869	no
0.298448	0.684045	3.13e-09	0.206993	ARPC5		Actin-related protein 2/3 complex subunit 5	O15511	14.6118	14.6319	14.8321	14.2224	15.5132	14.4865	14.9258	14.5666	0.168305	0.301248	no
0.232411	0.683885	3.13e-09	0.207069	TANC1		Protein TANC1	Q9C0D5	11.112	11.809	11.5003	11.8236	11.5855	11.7852	12.0769	11.7269	0.216893	0.185765	no
0.658938	0.683234	3.13e-09	0.20738	RBM6		RNA-binding protein 6	P78332	12.7304	14.8756	15.2673	15.0893	15.0237	15.2483	15.2017	15.1246	0.522149	0.332684	no
0.249744	0.682664	3.13e-09	0.207652	UTP23		rRNA-processing protein UTP23 homolog	Q9BRU9	11.0998	10.6445	10.5736	10.7723	11.481	11.0448	10.8728	10.6906	0.169742	0.225623	no
0.279849	0.682615	3.13e-09	0.207675	RNPC3		RNA-binding region-containing protein 3	Q96LT9	10.8969	10.4845	10.117	10.7154	11.1905	11.0168	10.5689	10.557	0.22293	0.231251	no
0.17643	0.682569	3.13e-09	0.207697	TFCP2		Alpha-globin transcription factor CP2	Q12800	11.0722	11.0751	10.8934	10.8237	11.1461	11.4196	11.1528	10.8517	0.0876781	0.141364	no
0.113141	0.682462	3.13e-09	0.207749	SH3BGRL		SH3 domain-binding glutamic acid-rich-like protein	O75368	16.7072	16.7028	16.818	16.8187	17.0219	16.6232	16.9786	16.8755	0.0453634	0.0964948	no
-0.064647	0.681939	3.13e-09	0.207999	CTSD		Cathepsin D	P07339	16.1901	16.114	16.1403	16.1747	16.0671	16.208	16.0192	16.0662	0.0236774	0.0465888	no
0.068048	0.681601	3.13e-09	0.208161	OXSR1		Serine/threonine-protein kinase OSR1	O95747	15.381	15.3083	15.2904	15.308	15.3679	15.5161	15.3382	15.3377	0.0282373	0.0514398	yes
0.215812	0.680826	3.13e-09	0.208533	CHTOP		Chromatin target of PRMT1 protein	Q9Y3Y2	10.4853	10.5441	10.9071	10.3488	10.9172	11.0432	10.6593	10.5289	0.173622	0.174236	no
-0.718033	0.680679	3.13e-09	0.208603	AKT3		RAC-gamma serine/threonine-protein kinase	Q9Y243	10.7888	9.55294	10.1249	11.2625	8.179	10.4329	10.1553	10.0899	0.493177	0.521266	yes
0.0926887	0.680496	3.13e-09	0.208691	SRSF9		Serine/arginine-rich splicing factor 9	Q13242	13.9175	13.872	13.9272	13.7705	14.1395	13.951	13.873	13.8946	0.0488139	0.0751188	no
0.2045	0.680362	3.13e-09	0.208756	ARPC1B		Actin-related protein 2/3 complex subunit 1B	O15143	15.1725	15.0653	15.381	14.7114	15.5871	15.1045	15.3466	15.1101	0.186975	0.177659	no
0.169116	0.680104	3.13e-09	0.20888	PPME1		Protein phosphatase methylesterase 1	Q9Y570	16.3503	16.379	16.5063	16.0672	16.7703	16.2146	16.56	16.4345	0.123423	0.149514	no
0.0853287	0.680065	3.13e-09	0.208899	ARFGAP2		ADP-ribosylation factor GTPase-activating protein 2	Q8N6H7	13.9481	14.0379	14.0491	13.9646	14.153	13.9148	14.1563	14.1169	0.0353038	0.0651469	no
-0.336692	0.67992	3.13e-09	0.208968	MLX		Max-like protein X	Q9UH92	9.74997	9.23089	9.231	9.42289	9.14629	9.54762	8.49626	9.09782	0.178449	0.239197	no
0.058995	0.679656	3.13e-09	0.209095	DIMT1		Probable dimethyladenosine transferase	Q9UNQ2	13.9879	13.9882	13.9912	13.9176	14.0685	14.0649	14.0099	13.9776	0.0244973	0.0338013	no
0.191596	0.679213	3.13e-09	0.209309	RRS1		Ribosome biogenesis regulatory protein homolog	Q15050	12.5153	12.1426	12.259	12.8742	12.6039	12.6906	12.6663	12.5968	0.233767	0.15817	no
-0.711813	0.67879	3.13e-09	0.209513	IFIH1		Interferon-induced helicase C domain-containing protein 1	Q9BYX4	7.69657	7.29655	6.41756	7.73756	6.86134	6.02268	7.15599	6.26098	0.357079	0.4311	no
0.142342	0.678483	3.13e-09	0.209661	SUMO3;SUMO2;SUMO4		Small ubiquitin-related modifier 3;Small ubiquitin-related modifier 2;Small ubiquitin-related modifier 4	P55854;P61956;Q6EEV6	18.765	18.7783	18.8903	18.6182	19.1007	18.6012	19.0202	18.8991	0.0767112	0.123766	no
0.0569738	0.67717	3.13e-09	0.210296	HNRNPM		Heterogeneous nuclear ribonucleoprotein M	P52272	17.3478	17.3902	17.3895	17.3148	17.5071	17.4011	17.38	17.3821	0.0251039	0.0390862	no
0.0984911	0.675645	3.13e-09	0.211035	BCLAF1		Bcl-2-associated transcription factor 1	Q9NYF8	12.1911	12.3809	12.2318	12.2335	12.3823	12.3666	12.2225	12.4598	0.0591597	0.0695305	no
-0.379879	0.675346	3.13e-09	0.211181	HELB		DNA helicase B	Q8NG08	9.78386	9.73561	10.0325	8.73898	8.91551	9.384	9.15783	9.31404	0.32942	0.307169	no
0.162853	0.674883	3.13e-09	0.211406	DERPC		Decreased expression in renal and prostate cancer protein	P0CG12	12.6426	12.7572	12.6972	12.4043	13.0054	12.4784	12.8943	12.7745	0.102884	0.137391	no
0.11226	0.674628	3.13e-09	0.21153	HMGB3		High mobility group protein B3	O15347	15.7513	15.7451	15.9167	15.6615	16.03	15.6796	15.9767	15.8374	0.075551	0.0966762	no
-0.0756321	0.674623	3.13e-09	0.211532	VPS18		Vacuolar protein sorting-associated protein 18 homolog	Q9P253	12.6884	12.7305	12.7413	12.696	12.689	12.699	12.541	12.6247	0.0178808	0.0437503	no
-0.329234	0.674454	3.13e-09	0.211615	ACOT8		Acyl-coenzyme A thioesterase 8	O14734	8.47898	8.90663	8.98298	8.7714	8.03449	8.50826	8.48878	8.79154	0.146711	0.199133	no
-0.206639	0.674373	3.13e-09	0.211654	MRPL40		39S ribosomal protein L40, mitochondrial	Q9NQ50	11.2255	11.3002	10.6516	11.2121	10.7477	11.0082	11.0128	10.794	0.186888	0.16608	no
-0.287574	0.674249	3.13e-09	0.211715	PLOD1		Procollagen-lysine,2-oxoglutarate 5-dioxygenase 1	Q02809	14.3909	14.2389	14.3468	14.2878	14.0652	14.4579	14.2939	13.2971	0.0461017	0.206861	no
-0.0968332	0.673546	3.13e-09	0.212057	UQCC1		Ubiquinol-cytochrome-c reductase complex assembly factor 1	Q9NVA1	11.5441	11.6452	11.602	11.6449	11.4668	11.4311	11.5962	11.5548	0.0328534	0.0536676	no
0.246721	0.673151	3.13e-09	0.212251	MED14		Mediator of RNA polymerase II transcription subunit 14	O60244	12.1695	12.097	12.3021	11.9805	12.9541	12.3919	12.1865	12.0034	0.0936414	0.251215	no
0.17133	0.672902	3.13e-09	0.212372	PPP1R14C		Protein phosphatase 1 regulatory subunit 14C	Q8TAE6	11.2007	11.172	11.2577	11.3029	11.765	11.1517	11.3971	11.3048	0.0406338	0.15139	no
0.13067	0.672726	3.13e-09	0.212458	GOT1		Aspartate aminotransferase, cytoplasmic	P17174	17.0863	17.0807	17.1948	16.8999	17.3718	16.9803	17.3412	17.0912	0.0831679	0.115237	no
-0.273644	0.67242	3.13e-09	0.212608	HOXB9		Homeobox protein Hox-B9	P17482	10.026	9.85782	10.2792	10.4327	10.378	9.72311	9.60926	9.79074	0.176504	0.221568	no
0.0864062	0.671675	3.13e-09	0.212973	SRA1		Steroid receptor RNA activator 1	Q9HD15	14.3181	14.3439	14.4126	14.3529	14.429	14.2697	14.5327	14.5418	0.0279235	0.0689155	no
0.170634	0.671046	3.13e-09	0.213282	MIF		Macrophage migration inhibitory factor	P14174	21.1717	21.0701	21.3047	20.8064	21.4494	21.0459	21.4268	21.1132	0.141654	0.146743	no
0.13747	0.670887	3.13e-09	0.21336	MPP6		MAGUK p55 subfamily member 6	Q9NZW5	11.1855	10.988	11.22	11.1472	11.2742	11.4854	11.1195	11.2116	0.0691238	0.101744	no
-0.0607165	0.670388	3.13e-09	0.213605	IDH1		Isocitrate dehydrogenase [NADP] cytoplasmic	O75874	16.2497	16.1913	16.1769	16.2946	16.1623	16.2534	16.117	16.137	0.0378529	0.0433671	no
-0.206775	0.670221	3.13e-09	0.213687	GTPBP10		GTP-binding protein 10	A4D1E9	12.6562	12.484	12.4444	12.8811	12.0056	12.6978	12.3726	12.5626	0.142086	0.171976	no
0.116164	0.670142	3.13e-09	0.213726	MCFD2		Multiple coagulation factor deficiency protein 2	Q8NI22	14.142	14.2613	14.2702	13.9718	14.1516	14.2045	14.4605	14.2933	0.0938124	0.0979091	no
-0.0809205	0.669471	3.13e-09	0.214057	GOLPH3		Golgi phosphoprotein 3	Q9H4A6	13.2755	13.2323	13.1851	13.1765	13.0854	13.2807	13.0961	13.0835	0.0319583	0.0569675	no
-0.134075	0.669258	3.13e-09	0.214162	GGA3		ADP-ribosylation factor-binding protein GGA3	Q9NZ52	11.7488	11.7244	11.698	11.6795	11.6735	11.7344	11.2977	11.6088	0.0210494	0.0932408	no
0.122029	0.66921	3.13e-09	0.214186	COPS3		COP9 signalosome complex subunit 3	Q9UNS2	15.0033	15.0358	15.1605	14.861	15.2765	14.8911	15.1869	15.1943	0.0849396	0.103814	no
-0.233076	0.668488	3.13e-09	0.214542	WDR89		WD repeat-containing protein 89	Q96FK6	11.3184	10.9493	11.2619	11.4597	11.1968	10.5242	11.154	11.1821	0.143031	0.177421	no
-0.0627703	0.667396	3.13e-09	0.215082	FBXL12		F-box/LRR-repeat protein 12	Q9NXK8	13.8588	13.7343	13.8024	13.7352	13.6926	13.7588	13.7289	13.6993	0.0418459	0.0389822	no
0.0785862	0.666676	3.13e-09	0.215439	DNPH1		2'-deoxynucleoside 5'-phosphate N-hydrolase 1	O43598	17.0868	17.2565	17.1186	17.295	17.2466	17.1839	17.3476	17.2931	0.070647	0.0623447	no
0.106694	0.666657	3.13e-09	0.215448	ESD		S-formylglutathione hydrolase	P10768	17.2805	17.3527	17.4026	17.3131	17.5829	17.2118	17.5707	17.4104	0.0366316	0.0926505	no
-0.226022	0.6664	3.13e-09	0.215576	GPSM1		G-protein-signaling modulator 1	Q86YR5	10.2231	10.237	9.83366	9.96266	9.87275	10.0916	9.48921	9.8988	0.135652	0.160927	no
0.0632196	0.665718	3.13e-09	0.215915	CPNE3		Copine-3	O75131	15.6859	15.6997	15.6886	15.6071	15.837	15.7417	15.6673	15.6882	0.0290919	0.0467402	no
0.103861	0.665674	3.13e-09	0.215937	CAD		CAD protein	P27708	16.1562	16.1834	16.2707	16.0292	16.4616	16.2804	16.1689	16.1439	0.06853	0.0912371	no
0.216478	0.665445	3.13e-09	0.21605	SPOUT1		Putative methyltransferase C9orf114	Q5T280	10.9841	11.0765	11.5259	11.4534	11.5038	11.732	11.1391	11.5311	0.185035	0.179135	no
-0.223688	0.663233	3.13e-09	0.217154	CC2D1B		Coiled-coil and C2 domain-containing protein 1B	Q5T0F9	11.4545	11.7899	11.6679	11.8768	11.7177	11.6921	10.9868	11.4976	0.123368	0.173145	no
0.209455	0.662844	3.13e-09	0.217348	ETHE1		Persulfide dioxygenase ETHE1, mitochondrial	O95571	12.7182	12.7451	12.9071	12.283	13.2051	12.6728	12.949	12.6643	0.172849	0.183671	no
0.18859	0.66271	3.13e-09	0.217415	RPL30		60S ribosomal protein L30	P62888	17.3759	17.3892	17.4707	16.9154	17.8132	17.385	17.4108	17.2967	0.16035	0.168662	no
0.062424	0.662445	3.13e-09	0.217548	YRDC		YrdC domain-containing protein, mitochondrial	Q86U90	14.2267	14.1679	14.1474	14.3013	14.2835	14.237	14.3066	14.2658	0.0483161	0.0407472	no
-0.207964	0.662373	3.13e-09	0.217584	CCND3		G1/S-specific cyclin-D3	P30281	10.4056	10.7855	10.4777	10.6323	10.2215	10.6466	10.0679	10.5333	0.118719	0.157447	no
-0.225626	0.662157	3.13e-09	0.217692	SERPINF1		Pigment epithelium-derived factor	P36955	9.72698	9.84488	9.67986	9.54174	9.4889	9.1223	9.72742	9.55234	0.086438	0.142473	no
-0.0751287	0.662114	3.13e-09	0.217714	TUBB2A		Tubulin beta-2A chain	Q13885	19.6298	19.5381	19.5096	19.5153	19.4368	19.6151	19.4317	19.4086	0.0392887	0.0577266	no
-0.219434	0.662098	3.13e-09	0.217722	TOP3A		DNA topoisomerase 3-alpha	Q13472	10.5297	10.9264	10.6398	10.776	10.5436	10.8971	10.3736	10.1799	0.119754	0.17387	no
0.233867	0.662033	3.13e-09	0.217754	NACC2		Nucleus accumbens-associated protein 2	Q96BF6	9.88319	10.2442	10.6203	10.3279	10.6717	10.3335	10.3057	10.7002	0.206384	0.181456	no
0.116999	0.661043	3.13e-09	0.218252	MCM7		DNA replication licensing factor MCM7	P33993	16.5235	16.578	16.5358	16.3269	16.8602	16.5582	16.5118	16.502	0.0749233	0.106781	no
0.0881727	0.660919	3.13e-09	0.218314	POGLUT3		Protein O-glucosyltransferase 3	Q7Z4H8	13.2406	13.3348	13.4254	13.5225	13.4975	13.4208	13.4358	13.522	0.0837615	0.0658561	no
0.15279	0.659969	3.13e-09	0.218792	MEF2D		Myocyte-specific enhancer factor 2D	Q14814	10.5249	10.6641	10.7817	10.5098	10.8499	10.6939	10.6029	10.9449	0.0900322	0.108423	no
-0.314098	0.659938	3.13e-09	0.218808	NPL		N-acetylneuraminate lyase	Q9BXD5	10.1984	10.4488	10.3065	10.4051	10.0635	10.4966	9.29442	10.2478	0.0762527	0.217556	no
0.143913	0.658793	3.13e-09	0.219385	TTC1		Tetratricopeptide repeat protein 1	Q99614	14.906	14.9369	15.0528	14.8855	15.3786	14.8037	15.1685	15.006	0.0528075	0.13448	no
0.14441	0.657537	3.13e-09	0.220021	PPP1R15A		Protein phosphatase 1 regulatory subunit 15A	O75807	11.0223	11.3991	11.1321	11.293	11.2904	11.2046	11.4625	11.4667	0.115638	0.10813	no
-0.100617	0.657441	3.13e-09	0.220069	XRCC1		DNA repair protein XRCC1	P18887	12.5179	12.3221	12.4452	12.5353	12.3121	12.4877	12.2414	12.3768	0.0658295	0.0741603	no
0.0723576	0.656653	3.13e-09	0.220469	PRPS2		Ribose-phosphate pyrophosphokinase 2	P11908	15.7247	15.8303	15.8285	15.7711	15.9499	15.722	15.9019	15.8702	0.0349526	0.0569874	no
0.15475	0.656525	3.13e-09	0.220534	C4orf33		UPF0462 protein C4orf33	Q8N1A6	11.7945	11.6097	11.8437	11.4328	11.9308	11.7026	11.6664	11.9999	0.126991	0.125051	no
-0.110446	0.656457	3.13e-09	0.220568	TRMT61A		tRNA (adenine(58)-N(1))-methyltransferase catalytic subunit TRMT61A	Q96FX7	11.8619	11.8317	12.0213	11.733	11.7441	11.8283	11.8052	11.6284	0.0841319	0.0803975	no
0.0736651	0.656352	3.13e-09	0.220622	SUB1		Activated RNA polymerase II transcriptional coactivator p15	P53999	18.7196	18.7456	18.8424	18.7407	18.8134	18.7129	18.9407	18.876	0.0385453	0.0582168	no
-0.094606	0.656231	3.13e-09	0.220683	BLOC1S1		Biogenesis of lysosome-related organelles complex 1 subunit 1	P78537	13.7891	13.7361	13.823	13.876	13.8228	13.5141	13.7827	13.7263	0.0407542	0.0725931	no
0.383426	0.656096	3.13e-09	0.220752	IFRD2		Interferon-related developmental regulator 2	Q12894	12.0819	12.7085	11.3153	12.8462	12.671	12.6782	12.6523	12.4841	0.422648	0.273566	no
0.0895681	0.655982	3.13e-09	0.220809	RWDD4		RWD domain-containing protein 4	Q6NW29	12.6942	12.6874	12.7852	12.6268	12.7594	12.9354	12.6883	12.7687	0.0456262	0.067022	no
-0.428128	0.65593	3.13e-09	0.220836	CCDC173		Coiled-coil domain-containing protein 173	Q0VFZ6	11.9323	12.0705	11.7183	12.812	10.86	12.3683	11.719	11.8734	0.364189	0.380052	no
0.0742608	0.655788	3.13e-09	0.220909	POLR3E		DNA-directed RNA polymerase III subunit RPC5	Q9NVU0	13.1302	13.1315	13.1261	13.1118	13.3016	13.0839	13.2306	13.1807	0.00625056	0.0510809	no
0.0868495	0.655044	3.13e-09	0.221287	BRD8		Bromodomain-containing protein 8	Q9H0E9	13.1767	13.214	13.2247	13.13	13.3501	13.1182	13.3793	13.2452	0.0294885	0.0664448	no
0.0995473	0.654573	3.13e-09	0.221527	IGF2BP1		Insulin-like growth factor 2 mRNA-binding protein 1	Q9NZI8	15.4808	15.4532	15.5018	15.2877	15.6529	15.6416	15.3807	15.4465	0.0655514	0.0852604	no
-0.104006	0.654517	3.13e-09	0.221556	DNAJA2		DnaJ homolog subfamily A member 2	O60884	15.6151	15.4941	15.4647	15.492	15.2746	15.4381	15.635	15.3021	0.0474405	0.0886621	no
0.0814883	0.653817	3.13e-09	0.221913	ARPP19		cAMP-regulated phosphoprotein 19	P56211	14.668	14.6863	14.6867	14.6955	14.6423	14.7056	14.9374	14.7772	0.00799718	0.0686146	no
-0.1323	0.653727	3.13e-09	0.221959	C12orf45		Uncharacterized protein C12orf45	Q8N5I9	13.5241	13.6724	13.501	13.6425	13.4147	13.3339	13.301	13.7612	0.0589672	0.11457	no
0.123335	0.653566	3.13e-09	0.222041	COPS4		COP9 signalosome complex subunit 4	Q9BT78	15.9486	16.0121	16.0456	15.8441	16.2748	15.8115	16.1737	16.0837	0.0605559	0.109572	no
-0.247998	0.653186	3.13e-09	0.222236	QRSL1		Glutamyl-tRNA(Gln) amidotransferase subunit A, mitochondrial	Q9H0R6	9.31518	9.75707	9.4824	9.64271	9.18067	9.66876	9.0486	9.30735	0.131766	0.173322	no
0.207419	0.652519	3.13e-09	0.222577	C18orf25		Uncharacterized protein C18orf25	Q96B23	10.8163	10.2265	10.6598	10.3301	10.4799	10.7562	10.9106	10.7156	0.191555	0.161404	no
-0.0554993	0.652247	3.13e-09	0.222717	HNRNPK		Heterogeneous nuclear ribonucleoprotein K	P61978	20.0999	20.0881	20.042	20.1704	20.0494	20.0601	20.0342	20.0348	0.037031	0.0327903	no
0.199302	0.652118	3.13e-09	0.222783	WDR91		WD repeat-containing protein 91	A4D1P6	12.4123	12.2731	12.4977	11.8393	12.7442	12.4175	12.3263	12.3315	0.187539	0.16801	no
0.062266	0.651844	3.13e-09	0.222923	COMMD5		COMM domain-containing protein 5	Q9GZQ3	13.5253	13.4913	13.5454	13.4755	13.6151	13.4889	13.5864	13.5964	0.022023	0.0374548	no
0.170206	0.651657	3.13e-09	0.22302	FMR1		Synaptic functional regulator FMR1	Q06787	11.135	10.871	11.2578	11.4311	11.3521	11.5288	11.2093	11.2856	0.15956	0.133173	no
-0.0942496	0.650721	3.13e-09	0.223501	TBRG4		FAST kinase domain-containing protein 4	Q969Z0	13.7251	13.629	13.682	13.5669	13.5152	13.7509	13.4573	13.5026	0.0471713	0.0760616	yes
0.101876	0.650714	3.13e-09	0.223504	CFAP36		Cilia- and flagella-associated protein 36	Q96G28	11.8012	11.7184	11.7471	11.6907	11.9627	11.6848	11.8927	11.8248	0.0329245	0.070355	no
0.109666	0.649573	3.13e-09	0.224093	CORO1C		Coronin-1C	Q9ULV4	15.1785	15.2936	15.3663	15.1146	15.5163	15.1446	15.3687	15.362	0.0783792	0.0958414	no
0.0989176	0.649226	3.13e-09	0.224272	ZCCHC3		Zinc finger CCHC domain-containing protein 3	Q9NUD5	12.2853	12.3391	12.3273	12.1399	12.518	12.2711	12.3514	12.3469	0.0618215	0.0733771	no
-0.149902	0.648946	3.13e-09	0.224416	SULT1A3;SULT1A4		Sulfotransferase 1A3;Sulfotransferase 1A4	P0DMM9;P0DMN0	11.5059	11.624	11.8862	11.8383	11.4401	11.7734	11.4402	11.6011	0.12281	0.123307	no
-0.0786636	0.648875	3.13e-09	0.224453	SMU1		WD40 repeat-containing protein SMU1	Q2TAY7	14.5167	14.519	14.4776	14.6025	14.3587	14.5946	14.374	14.4738	0.0368233	0.0616756	no
0.0756611	0.648543	3.13e-09	0.224624	SHCBP1		SHC SH2 domain-binding protein 1	Q8NEM2	12.8111	12.9112	12.7635	12.7804	12.9307	12.9539	12.8652	12.8191	0.0465915	0.0497863	no
-1.33255	0.648263	3.13e-09	0.224769	MYSM1		Histone H2A deubiquitinase MYSM1	Q5VVJ2	12.5344	12.5387	12.8125	12.4591	12.7204	12.2794	7.50992	12.5047	0.112308	0.41057	no
-0.0821614	0.646946	3.13e-09	0.225452	NMRAL1		NmrA-like family domain-containing protein 1	Q9HBL8	12.5433	12.4215	12.5082	12.5361	12.3361	12.5206	12.4448	12.3791	0.0381555	0.0533058	no
0.115683	0.646319	3.13e-09	0.225777	KYAT3		Kynurenine--oxoglutarate transaminase 3	Q6YP21	14.6757	14.8039	14.7879	14.6924	15.0105	14.5777	14.9396	14.8948	0.0452058	0.101115	no
-0.209964	0.646286	3.13e-09	0.225795	SPINDOC		Spindlin interactor and repressor of chromatin-binding protein	Q9BUA3	9.51243	10.0379	9.92303	10.0389	9.75687	9.51944	9.76704	9.62905	0.159837	0.147528	no
0.192958	0.645832	3.13e-09	0.226031	CLSPN		Claspin	Q9HAW4	11.2759	11.2305	11.3971	10.8523	11.6219	11.1061	11.49	11.3097	0.153176	0.158652	no
0.104314	0.645814	3.13e-09	0.22604	PSMA6		Proteasome subunit alpha type-6	P60900	17.5854	17.5927	17.6731	17.517	17.8632	17.4756	17.7896	17.6571	0.0444248	0.0927017	no
-0.371468	0.644902	3.13e-09	0.226516	TMCO6		Transmembrane and coiled-coil domain-containing protein 6	Q96DC7	9.12348	9.21106	8.73715	9.42906	8.64772	8.68924	8.24099	9.43694	0.191678	0.283546	no
-0.101789	0.644762	3.13e-09	0.226589	IQGAP2		Ras GTPase-activating-like protein IQGAP2	Q13576	14.1499	14.0517	13.9974	14.2094	13.8658	14.1912	13.9304	14.0139	0.0661492	0.0856958	no
0.0826167	0.644402	3.13e-09	0.226776	MPST		3-mercaptopyruvate sulfurtransferase	P25325	14.3422	14.3527	14.3159	14.1469	14.4643	14.4284	14.2896	14.3059	0.0646494	0.0654203	no
0.243393	0.644009	3.13e-09	0.226982	HDGFL3		Hepatoma-derived growth factor-related protein 3	Q9Y3E1	12.5612	12.644	12.6367	12.2751	13.2656	12.3092	12.9149	12.6009	0.113877	0.239555	no
0.0852404	0.643878	3.13e-09	0.22705	SEPHS1		Selenide, water dikinase 1	P49903	15.5109	15.5986	15.6554	15.5893	15.7153	15.4938	15.796	15.6901	0.0409642	0.0717559	no
-0.174382	0.643047	3.13e-09	0.227485	SPECC1		Cytospin-B	Q5M775	11.0728	10.8777	11.0195	11.2787	10.7564	11.2137	10.8229	10.7582	0.116934	0.143189	no
-0.127546	0.64299	3.13e-09	0.227515	BRD7		Bromodomain-containing protein 7	Q9NPI1	11.8567	11.9573	11.8967	11.8896	11.7632	12.0472	11.6394	11.6403	0.0292563	0.0999699	no
-0.0768076	0.642881	3.13e-09	0.227572	SF3A3		Splicing factor 3A subunit 3	Q12874	15.7322	15.6103	15.5661	15.6916	15.6021	15.6954	15.4746	15.521	0.052279	0.0623821	no
-0.0830411	0.642145	3.13e-09	0.227958	PELP1		Proline-, glutamic acid- and leucine-rich protein 1	Q8IZL8	13.6604	13.627	13.7436	13.8321	13.547	13.5753	13.6796	13.729	0.0642087	0.0652722	no
0.0597446	0.641789	3.13e-09	0.228145	USP39		U4/U6.U5 tri-snRNP-associated protein 2	Q53GS9	14.2007	14.2936	14.2811	14.178	14.3194	14.3229	14.2335	14.3167	0.0398649	0.0390503	no
0.0941047	0.641477	3.13e-09	0.228309	TNPO2		Transportin-2	O14787	15.4059	15.4437	15.5631	15.3682	15.7252	15.3971	15.528	15.5069	0.0595566	0.0836229	no
-0.10336	0.64098	3.13e-09	0.22857	HAUS8		HAUS augmin-like complex subunit 8	Q9BT25	12.3239	12.2271	12.3101	12.2327	12.053	12.3667	12.175	12.0856	0.0351007	0.0771385	no
-0.0566812	0.640809	3.13e-09	0.228661	TUBA4A		Tubulin alpha-4A chain	P68366	15.3807	15.3495	15.3355	15.3966	15.2775	15.4091	15.2832	15.2657	0.0194169	0.0391	no
0.112187	0.639411	3.13e-09	0.229398	EXOSC5		Exosome complex component RRP46	Q9NQT4	14.8271	14.803	14.9411	14.7595	15.1272	14.7145	15.0439	14.894	0.0545732	0.100812	no
-0.10097	0.639248	3.13e-09	0.229484	RANBP9		Ran-binding protein 9	Q96S59	13.8647	13.8374	13.98	13.9491	13.812	13.8567	13.5956	13.963	0.046907	0.0813408	no
-0.236684	0.638542	3.13e-09	0.229857	PPP1R9B		Neurabin-2	Q96SB3	10.9502	11.1387	11.2963	10.7277	10.7549	11.2614	10.6433	10.5065	0.167211	0.206697	no
0.109326	0.637882	3.13e-09	0.230207	TAF8		Transcription initiation factor TFIID subunit 8	Q7Z7C8	11.1557	11.0964	11.2513	11.0584	11.2032	11.162	11.3573	11.2766	0.0589299	0.0684193	no
0.0585964	0.637585	3.13e-09	0.230364	OGFOD1		Prolyl 3-hydroxylase OGFOD1	Q8N543	14.7701	14.8044	14.8184	14.7692	14.9299	14.7889	14.8878	14.7898	0.0172076	0.0412577	no
0.279896	0.637557	3.13e-09	0.230379	MAST2;MAST1		Microtubule-associated serine/threonine-protein kinase 2;Microtubule-associated serine/threonine-protein kinase 1	Q6P0Q8;Q9Y2H9	10.8367	11.1461	10.5511	10.9357	10.5802	11.2282	11.6437	11.137	0.167961	0.260213	yes
0.170947	0.637461	3.13e-09	0.23043	CAPZA2		F-actin-capping protein subunit alpha-2	P47755	15.9623	16.198	16.1975	15.9672	16.5399	15.8568	16.3439	16.2681	0.0930467	0.159073	no
-0.0661495	0.636184	3.13e-09	0.231109	PPIL2		RING-type E3 ubiquitin-protein ligase PPIL2	Q13356	14.7217	14.7457	14.6735	14.7871	14.6416	14.7878	14.6189	14.615	0.032827	0.0496032	no
-0.222572	0.635693	3.13e-09	0.23137	CISH		Cytokine-inducible SH2-containing protein	Q9NSE2	11.5433	11.6579	11.5157	11.2187	11.2974	11.7203	10.8986	11.1291	0.124071	0.190233	no
0.0980631	0.635077	3.13e-09	0.231699	SMARCB1		SWI/SNF-related matrix-associated actin-dependent regulator of chromatin subfamily B member 1	Q12824	14.0216	14.034	14.0727	13.8345	14.2232	14.1685	13.9799	13.9835	0.0713428	0.082937	no
-0.337242	0.635058	3.13e-09	0.231709	TTF2		Transcription termination factor 2	Q9UNY4	9.66531	9.43495	9.26973	9.84454	8.49919	9.46533	9.59178	9.30927	0.174986	0.239293	no
0.403133	0.635036	3.13e-09	0.23172	KRR1		KRR1 small subunit processome component homolog	Q13601	12.2612	12.1712	11.9417	12.1643	12.204	12.3829	11.9359	13.6282	0.0911999	0.518859	no
0.180219	0.634438	3.13e-09	0.232039	BMS1		Ribosome biogenesis protein BMS1 homolog	Q14692	10.9628	11.0736	10.941	10.6083	11.3361	11.1611	10.8628	10.9465	0.131808	0.148217	no
-0.0945458	0.634349	3.13e-09	0.232087	MRPL43		39S ribosomal protein L43, mitochondrial	Q8N983	12.4025	12.3777	12.3336	12.3326	12.3737	12.38	12.1703	12.1443	0.0239145	0.0670579	no
-0.136009	0.634303	3.13e-09	0.232112	GNL2		Nucleolar GTP-binding protein 2	Q13823	12.0589	11.9409	11.9676	11.921	11.7648	12.1526	11.7066	11.7202	0.0428554	0.112702	no
0.0865563	0.634049	3.13e-09	0.232248	KIF14		Kinesin-like protein KIF14	Q15058	11.5874	11.5701	11.5528	11.6034	11.6785	11.7101	11.5647	11.7067	0.0151221	0.0460854	no
-0.174915	0.633809	3.13e-09	0.232376	C2orf49		Ashwin	Q9BVC5	11.963	12.3622	12.318	12.2547	12.2675	12.2674	11.8271	11.8363	0.118119	0.147962	no
0.238323	0.633466	3.13e-09	0.23256	PPCDC		Phosphopantothenoylcysteine decarboxylase	Q96CD2	10.3278	10.7393	10.5433	10.0119	10.8968	10.3659	10.8249	10.488	0.209589	0.196737	no
0.138134	0.63345	3.13e-09	0.232568	MYL6B		Myosin light chain 6B	P14649	16.4584	16.5131	16.6013	16.313	16.8637	16.3193	16.6196	16.6357	0.0826576	0.128515	no
0.206341	0.633423	3.13e-09	0.232583	MEN1		Menin	O00255	9.96836	10.1537	10.2753	10.0929	10.5389	10.5891	10.2113	9.97636	0.0884456	0.168289	no
0.14585	0.633144	3.13e-09	0.232732	THAP12		52 kDa repressor of the inhibitor of the protein kinase	O43422	10.722	10.6153	10.5982	10.8248	11.0336	10.8724	10.8131	10.6245	0.0738442	0.107723	no
0.0785216	0.63314	3.13e-09	0.232734	RAD51C		DNA repair protein RAD51 homolog 3	O43502	12.317	12.3883	12.3049	12.461	12.4415	12.3788	12.4613	12.5036	0.0505293	0.0494694	no
-0.10777	0.633046	3.13e-09	0.232785	ARID1B		AT-rich interactive domain-containing protein 1B	Q8NFD5	11.7761	11.5794	11.6961	11.6561	11.6126	11.7128	11.4994	11.4519	0.0568468	0.0754322	no
-0.0500051	0.632961	3.13e-09	0.23283	BLVRA		Biliverdin reductase A	P53004	17.8181	17.7696	17.7561	17.8484	17.7033	17.7944	17.7347	17.7598	0.0297486	0.0321455	no
0.086267	0.632819	3.13e-09	0.232906	AARSD1		Alanyl-tRNA editing protein Aarsd1	Q9BTE6	13.6151	13.6123	13.5955	13.3844	13.7047	13.6683	13.6482	13.5312	0.0746122	0.0664124	no
-0.0921265	0.632451	3.13e-09	0.233104	C5orf51		UPF0600 protein C5orf51	A6NDU8	14.4027	14.459	14.2811	14.5472	14.2268	14.48	14.3104	14.3043	0.076637	0.0784063	no
-0.137506	0.632126	3.13e-09	0.233278	HIP1R		Huntingtin-interacting protein 1-related protein	O75146	13.7454	13.8595	13.7012	13.9454	13.4463	13.9042	13.5316	13.8193	0.0771643	0.118773	no
0.118241	0.631953	3.13e-09	0.233371	TTC19		Tetratricopeptide repeat protein 19, mitochondrial	Q6DKK2	11.8889	11.6627	11.7004	11.9532	11.8681	11.8757	12.0835	11.851	0.0982331	0.0924443	no
-0.376761	0.631857	3.13e-09	0.233423	N4BP1		NEDD4-binding protein 1	O75113	13.7339	13.6522	13.5394	14.4079	12.5931	13.9803	13.5558	13.6971	0.300851	0.324275	no
0.252873	0.631814	3.13e-09	0.233446	PSMB10		Proteasome subunit beta type-10	P40306	9.86776	9.6316	9.80569	9.91622	9.88917	10.3862	10.3655	9.59188	0.0837974	0.218136	no
-0.0522772	0.631425	3.13e-09	0.233655	SNX1		Sorting nexin-1	Q13596	15.4084	15.4366	15.4186	15.5165	15.3558	15.4455	15.3774	15.3922	0.0344829	0.0346554	no
-0.0619053	0.630717	3.13e-09	0.234036	TSEN15		tRNA-splicing endonuclease subunit Sen15	Q8WW01	13.9871	13.9998	14.032	14.0677	13.9236	13.8885	14.0434	13.9833	0.0250886	0.0414382	no
0.26943	0.630691	3.13e-09	0.23405	ATP7A		Copper-transporting ATPase 1	Q04656	9.37735	9.37083	10.021	9.50852	10.0242	9.68963	10.144	9.49754	0.232085	0.222971	no
0.0921713	0.630562	3.13e-09	0.23412	EXOC8		Exocyst complex component 8	Q8IYI6	12.2504	11.9903	12.1444	12.1023	12.2162	12.2941	12.18	12.1658	0.0744197	0.0638765	no
0.0735182	0.630486	3.13e-09	0.234161	PRMT3		Protein arginine N-methyltransferase 3	O60678	13.845	13.8576	13.9397	13.9077	14.1073	13.8938	13.9178	13.9252	0.0306363	0.0583274	no
-0.117916	0.630437	3.13e-09	0.234187	MTA3		Metastasis-associated protein MTA3	Q9BTC8	12.4252	12.4213	12.4919	12.1896	12.4357	12.1021	12.2715	12.2471	0.0882276	0.0952695	no
0.247781	0.630293	3.13e-09	0.234265	PLEKHA2		Pleckstrin homology domain-containing family A member 2	Q9HB19	10.3382	10.6626	10.6481	11.2592	11.2421	10.8563	10.7726	11.0282	0.284325	0.216519	no
0.204388	0.630272	3.13e-09	0.234276	HNRNPDL		Heterogeneous nuclear ribonucleoprotein D-like	O14979	16.524	16.2356	16.7182	15.9909	16.8262	16.5381	16.6202	16.3018	0.218103	0.183195	no
0.0554427	0.629813	3.13e-09	0.234524	H1-10		Histone H1.10	Q92522	13.5467	13.6042	13.5341	13.5571	13.6656	13.6105	13.6	13.5879	0.021358	0.0294668	no
0.0775604	0.629587	3.13e-09	0.234646	TAL1		T-cell acute lymphocytic leukemia protein 1	P17542	12.2368	12.3189	12.1538	12.304	12.294	12.3349	12.3717	12.3231	0.0516141	0.0459117	no
0.0891934	0.629027	3.13e-09	0.234949	RPL27		60S ribosomal protein L27	P61353	17.6615	17.6261	17.6983	17.4816	17.8858	17.6391	17.6733	17.626	0.0642038	0.0791964	no
0.154971	0.62792	3.13e-09	0.235549	AP2S1		AP-2 complex subunit sigma	P53680	14.0029	14.0128	14.0962	13.6581	14.3917	13.9774	14.0972	13.9235	0.126712	0.143227	no
-0.151522	0.62769	3.13e-09	0.235673	NEDD1		Protein NEDD1	Q8NHV4	11.4083	11.4733	11.5613	11.4195	11.1283	11.4824	11.0964	11.5491	0.0490825	0.118203	no
0.191083	0.627615	3.13e-09	0.235714	HTATIP2		Oxidoreductase HTATIP2	Q9BUP3	10.5196	10.791	10.8737	10.3907	11.0452	10.7788	10.5605	10.9548	0.155339	0.155082	no
0.1293	0.627281	3.13e-09	0.235895	TSC22D4		TSC22 domain family protein 4	Q9Y3Q8	13.3339	13.5379	13.5321	13.3534	13.791	13.3138	13.6445	13.5252	0.0766425	0.117188	no
0.430812	0.62706	3.13e-09	0.236015	KCTD3		BTB/POZ domain-containing protein KCTD3	Q9Y597	13.3093	12.7145	12.1382	12.0668	13.4661	13.2086	12.1299	13.1474	0.423896	0.380107	no
-0.263472	0.626884	3.13e-09	0.236111	BCL2L1		Bcl-2-like protein 1	Q07817	12.086	12.7209	12.1678	12.9018	12.0655	11.9444	12.2101	12.6025	0.277571	0.256973	no
0.138344	0.626113	3.13e-09	0.23653	RPL35		60S ribosomal protein L35	P42766	18.0746	17.9453	18.0987	17.6378	18.2563	18.1257	18.0004	17.9276	0.138774	0.121332	no
-0.513162	0.625679	3.13e-09	0.236767	SNUPN		Snurportin-1	O95149	7.92115	8.26984	8.70427	8.17386	8.45548	7.74365	6.7756	8.04173	0.235465	0.336085	no
-0.301467	0.623557	3.13e-09	0.237926	GGACT		Gamma-glutamylaminecyclotransferase	Q9BVM4	9.99384	9.49419	9.51712	10.1749	9.04228	9.62161	9.91533	9.39499	0.23773	0.251386	no
-0.157145	0.623054	3.13e-09	0.238202	D2HGDH		D-2-hydroxyglutarate dehydrogenase, mitochondrial	Q8N465	11.6353	11.6713	11.4877	11.5976	11.5723	11.323	11.7154	11.1526	0.054148	0.125351	no
0.109087	0.622493	3.13e-09	0.23851	CAST		Calpastatin	P20810	15.4463	15.5578	15.6107	15.3564	15.6123	15.3884	15.7791	15.6278	0.0783397	0.0985227	no
-0.462828	0.622439	3.13e-09	0.23854	GNL3		Guanine nucleotide-binding protein-like 3	Q9BVP2	14.5352	14.997	14.981	15.207	13.2817	15.0365	14.4202	15.1305	0.184439	0.327438	no
0.324738	0.621609	3.13e-09	0.238996	HINT3		Histidine triad nucleotide-binding protein 3	Q9NQE9	9.27906	9.60347	9.50346	9.20613	9.77012	10.2485	9.86283	9.0096	0.129301	0.288586	no
0.0815634	0.621468	3.13e-09	0.239074	MPI		Mannose-6-phosphate isomerase	P34949	12.6563	12.6664	12.7937	12.7246	12.7276	12.9021	12.7044	12.8332	0.0442746	0.0601331	no
-0.40292	0.62128	3.13e-09	0.239178	RAB6D;RAB6C		Ras-related protein Rab-6D;Ras-related protein Rab-6C	Q53S08;Q9H0N0	11.7428	11.4459	11.2495	12.4407	10.5119	11.7683	11.3403	11.6468	0.393888	0.379257	no
0.365321	0.620604	3.13e-09	0.23955	CENPC		Centromere protein C	Q03188	12.4802	12.3141	12.4512	11.1035	12.4118	12.1731	12.7507	12.4747	0.356074	0.263473	no
0.105569	0.620387	3.13e-09	0.23967	HSPB1		Heat shock protein beta-1	P04792	18.2392	18.2395	18.3242	18.0152	18.5038	18.2104	18.3099	18.2164	0.0887365	0.0953897	no
0.245493	0.620123	3.13e-09	0.239815	SAP130		Histone deacetylase complex subunit SAP130	Q9H0E3	10.7622	11.0406	10.8736	10.0535	11.0008	10.8718	10.9158	10.9234	0.264572	0.179431	no
0.784594	0.619319	3.13e-09	0.24026	RPS29		40S ribosomal protein S29	P62273	10.7087	10.4879	11.3958	8.13286	11.6203	11.1325	10.7514	10.3594	0.651409	0.489104	no
-0.305337	0.619201	3.13e-09	0.240325	INTS10		Integrator complex subunit 10	Q9NVR2	12.2366	11.5076	12.0602	12.3231	11.8913	12.0508	11.9033	11.0607	0.228905	0.251607	no
-0.21485	0.618926	3.13e-09	0.240477	SPATA5L1		Spermatogenesis-associated protein 5-like protein 1	Q9BVQ7	12.4768	12.5933	12.9043	12.4611	12.8953	12.3014	12.2799	12.0996	0.150087	0.203834	no
-0.117539	0.618286	3.13e-09	0.240832	HDHD5		Haloacid dehalogenase-like hydrolase domain-containing 5	Q9BXW7	14.3385	14.295	14.3089	14.4119	14.2131	14.4716	13.9673	14.2322	0.0365924	0.101297	no
0.0813751	0.617712	3.13e-09	0.24115	SNRPG		Small nuclear ribonucleoprotein G	P62308	17.8352	17.9593	17.9071	17.9414	18.0654	17.8003	18.0496	18.0532	0.0375653	0.0694308	no
0.570731	0.617055	3.13e-09	0.241516	FMNL3		Formin-like protein 3	Q8IVF7	10.9934	10.679	11.1387	9.19682	11.907	10.532	11.2594	10.5925	0.454388	0.477648	no
-0.389953	0.616486	3.13e-09	0.241832	ARL6		ADP-ribosylation factor-like protein 6	Q9H0F7	10.2218	10.5204	10.5477	9.68027	10.3981	9.75151	9.05449	10.2062	0.252427	0.308904	no
0.109894	0.615108	3.13e-09	0.242601	PPIA		Peptidyl-prolyl cis-trans isomerase A	P62937	21.7484	21.889	21.8435	21.7712	22.1009	21.679	21.96	21.9519	0.0450952	0.0956976	no
0.170095	0.614805	3.13e-09	0.24277	WDR6		WD repeat-containing protein 6	Q9NNW5	12.7877	12.4578	12.5416	12.3154	12.8724	12.7745	12.7989	12.337	0.140535	0.152417	no
-1.0564	0.614607	3.13e-09	0.242881	UBP1		Upstream-binding protein 1	Q9NZI7	11.013	11.2488	10.4765	10.9859	10.2378	11.3227	6.89644	11.0417	0.210085	0.459365	no
-0.0748251	0.614427	3.13e-09	0.242981	SEC23IP		SEC23-interacting protein	Q9Y6Y8	13.279	13.3606	13.2361	13.3182	13.2697	13.3089	13.0981	13.218	0.0369004	0.0542015	no
0.250587	0.614215	3.13e-09	0.2431	DTWD1		DTW domain-containing protein 1	Q8N5C7	9.42875	10.1916	9.29516	9.66081	9.80676	9.86746	9.97198	9.93248	0.293953	0.197741	no
-0.15908	0.613921	3.13e-09	0.243264	KMT2D		Histone-lysine N-methyltransferase 2D	O14686	11.6626	11.6903	11.754	12.1274	11.4154	11.6196	11.7883	11.7746	0.159502	0.145043	no
0.183082	0.613009	3.13e-09	0.243776	BRF1		Transcription factor IIIB 90 kDa subunit	Q92994	10.8364	11.2439	11.1986	10.7292	11.0262	11.3999	11.046	11.2684	0.176341	0.153736	no
-0.0925832	0.612366	3.13e-09	0.244137	SAP18		Histone deacetylase complex subunit SAP18	O00422	11.9432	11.8187	11.7874	11.8401	11.656	11.8521	11.6992	11.8117	0.0475114	0.0618118	no
-0.200399	0.611451	3.13e-09	0.244652	ZNF273		Zinc finger protein 273	Q14593	11.1477	10.9763	10.9878	11.0688	10.5179	11.3202	10.7305	10.8103	0.0558517	0.171625	no
0.144315	0.611442	3.13e-09	0.244657	VPS26B		Vacuolar protein sorting-associated protein 26B	Q4G0F5	12.7612	12.726	13.1589	13.0607	13.1769	12.8524	13.083	13.1718	0.149608	0.126897	no
-0.0675208	0.610785	3.13e-09	0.245027	HMMR		Hyaluronan mediated motility receptor	O75330	12.6578	12.7831	12.6684	12.7172	12.6024	12.6474	12.6191	12.6874	0.0400112	0.0403428	no
0.517614	0.6107	3.13e-09	0.245075	RPP21		Ribonuclease P protein subunit p21	Q9H633	9.64166	9.38562	10.0356	8.30486	10.533	9.00208	9.97876	9.92435	0.431221	0.424343	no
0.101344	0.610696	3.13e-09	0.245078	SUGP1		SURP and G-patch domain-containing protein 1	Q8IWZ8	12.355	12.362	12.4069	12.1223	12.5462	12.3343	12.3822	12.3889	0.0852942	0.0789087	no
0.124529	0.60922	3.13e-09	0.245912	SNRPD3		Small nuclear ribonucleoprotein Sm D3	P62318	18.2303	18.3589	18.3863	18.2266	18.6326	18.1268	18.5266	18.4142	0.0582472	0.11681	no
-0.177321	0.609047	3.13e-09	0.24601	SMYD3		Histone-lysine N-methyltransferase SMYD3	Q9H7B4	10.7904	10.8547	10.8331	10.7786	10.6733	11.0274	10.4481	10.3986	0.0247918	0.142489	no
-0.0650686	0.608047	3.13e-09	0.246577	NME6		Nucleoside diphosphate kinase 6	O75414	12.6551	12.5938	12.6706	12.6775	12.5335	12.5672	12.6157	12.6203	0.0261668	0.0349523	no
-0.0778868	0.607784	3.13e-09	0.246727	OSGEP		Probable tRNA N6-adenosine threonylcarbamoyltransferase	Q9NPF4	13.8059	13.6854	13.8515	13.6936	13.6802	13.555	13.7333	13.7563	0.0574053	0.0618673	no
-0.0712428	0.60732	3.13e-09	0.24699	PPT1		Palmitoyl-protein thioesterase 1	P50897	13.9053	13.7728	13.9195	13.8267	13.7425	13.8544	13.6916	13.8507	0.0474756	0.0545183	no
1.39468	0.60646	3.13e-09	0.24748	H2AC4;H2AC11;H2AC7;H2AC20;H2AC18;H2AW;H2AC6;H2AC12;H2AC14;H2AJ		Histone H2A type 1-B/E;Histone H2A type 1;Histone H2A type 1-D;Histone H2A type 2-C;Histone H2A type 2-A;Histone H2A type 3;Histone H2A type 1-C;Histone H2A type 1-H;Histone H2A type 1-J;Histone H2A.J	P04908;P0C0S8;P20671;Q16777;Q6FI13;Q7L7L0;Q93077;Q96KK5;Q99878;Q9BTM1	11.8697	9.63984	11.4841	9.41192	15.2968	11.7733	11.5802	9.33391	0.753797	1.94753	no
-0.10434	0.606231	3.13e-09	0.24761	MRPL58		Peptidyl-tRNA hydrolase ICT1, mitochondrial	Q14197	13.2241	13.3034	13.1996	13.4078	13.2158	13.3593	12.988	13.1544	0.065966	0.0886702	no
0.101923	0.606124	3.13e-09	0.247671	AGAP1		Arf-GAP with GTPase, ANK repeat and PH domain-containing protein 1	Q9UPQ3	11.4038	11.3393	11.393	11.3204	11.5525	11.5667	11.4312	11.3137	0.0280812	0.0694772	no
-0.106275	0.606075	3.13e-09	0.247699	LARP4		La-related protein 4	Q71RC2	12.7068	12.6423	12.6373	12.7759	12.392	12.7884	12.5441	12.6128	0.0455479	0.0869921	no
-0.225399	0.605989	3.13e-09	0.247748	INTS6L		Integrator complex subunit 6-like	Q5JSJ4	10.8343	10.5395	10.5644	10.746	10.2806	10.9653	10.1161	10.4206	0.0993214	0.195389	no
0.345833	0.60582	3.13e-09	0.247845	LDAH		Lipid droplet-associated hydrolase	Q9H6V9	8.91235	9.26972	9.07442	8.78734	10.1504	9.23418	8.91658	9.12602	0.146425	0.365755	no
-0.0937074	0.605757	3.13e-09	0.247881	BNIP2		BCL2/adenovirus E1B 19 kDa protein-interacting protein 2	Q12982	12.0375	11.8996	11.998	12.178	11.9895	11.868	11.9121	11.9687	0.0808117	0.0695988	no
-0.383759	0.605619	3.13e-09	0.247959	CCDC88C		Protein Daple	Q9P219	10.4077	10.6382	10.3912	10.8176	10.4096	9.13798	10.5822	10.5899	0.143587	0.264747	no
-0.0921701	0.603968	3.13e-09	0.248904	RPS15A		40S ribosomal protein S15a	P62244	17.2722	17.2083	17.11	17.251	17.0667	17.335	16.9851	17.0861	0.0490988	0.083064	no
0.052702	0.603836	3.13e-09	0.24898	FASN		Fatty acid synthase	P49327	18.2983	18.2912	18.3171	18.2825	18.4302	18.383	18.2946	18.292	0.0102407	0.0379956	no
-0.0983617	0.603791	3.13e-09	0.249006	TRIR		Telomerase RNA component interacting RNase	Q9BQ61	14.3698	14.3408	14.3615	14.5543	14.234	14.1481	14.3781	14.4728	0.0709986	0.0872233	no
0.331255	0.603281	3.13e-09	0.249298	FER		Tyrosine-protein kinase Fer	P16591	9.34797	9.25919	9.86034	9.29621	10.2089	9.1165	9.60992	10.1533	0.212698	0.304002	yes
0.0543809	0.60316	3.13e-09	0.249367	HSPA4		Heat shock 70 kDa protein 4	P34932	18.3825	18.4497	18.4342	18.4227	18.5757	18.4215	18.4428	18.4667	0.019797	0.0403223	no
-0.0553324	0.601389	3.13e-09	0.250386	HTATSF1		HIV Tat-specific factor 1	O43719	15.0696	15.051	15.1262	15.1869	14.9988	15.0857	15.0363	15.0916	0.042789	0.0402641	no
0.149733	0.600771	3.13e-09	0.250743	NFAT5		Nuclear factor of activated T-cells 5	O94916	10.4273	10.8176	10.4585	10.4086	10.6017	10.8049	10.6892	10.6153	0.143061	0.112785	no
-0.0740318	0.60052	3.13e-09	0.250888	ALDH5A1		Succinate-semialdehyde dehydrogenase, mitochondrial	P51649	13.1239	13.1137	13.1917	13.2529	13.1198	12.9976	13.195	13.0737	0.0452997	0.054786	no
-0.0900729	0.600507	3.13e-09	0.250896	KIFBP		KIF-binding protein	Q96EK5	12.9353	13.0259	12.9419	12.8485	12.7849	13.0321	12.7705	12.8038	0.0501806	0.0734583	no
0.632758	0.600475	3.13e-09	0.250914	MAZ		Myc-associated zinc finger protein	P56270	9.88554	10.3915	10.081	7.77495	10.6316	9.84827	10.0641	10.1201	0.536401	0.382063	no
-0.255274	0.600014	3.13e-09	0.251181	LBH		Protein LBH	Q53QV2	11.1747	11.2982	11.1718	10.6349	10.4018	10.6792	11.288	10.8894	0.186337	0.224814	no
0.165904	0.599896	3.13e-09	0.251249	ARID4B		AT-rich interactive domain-containing protein 4B	Q4LE39	10.338	10.7265	10.3108	10.4675	10.7786	10.382	10.6704	10.6755	0.137132	0.130185	no
-0.079153	0.599885	3.13e-09	0.251255	C1D		Nuclear nucleic acid-binding protein C1D	Q13901	14.8984	14.8022	14.7845	14.7802	14.7908	14.8843	14.6565	14.617	0.0391638	0.0669659	no
0.383821	0.599849	3.13e-09	0.251276	TCF4		Transcription factor 4	P15884	7.30765	8.08929	8.45824	8.20403	8.477	8.22696	8.26678	8.62376	0.301236	0.233921	no
-0.140459	0.599457	3.13e-09	0.251503	RNF5		E3 ubiquitin-protein ligase RNF5	Q99942	10.5365	10.3452	10.4852	10.519	10.1904	10.4389	10.475	10.2197	0.0586822	0.0904925	no
0.108541	0.59942	3.13e-09	0.251524	COMMD10		COMM domain-containing protein 10	Q9Y6G5	12.7766	12.8478	12.8321	12.8876	13.1467	12.7094	12.9998	12.9224	0.0317618	0.0970506	no
0.168646	0.598818	3.13e-09	0.251873	SYNE1		Nesprin-1	Q8NF91	13.8298	13.2641	13.7718	13.7911	13.8755	14.0232	13.8512	13.5815	0.168527	0.147142	no
-0.274526	0.598349	3.13e-09	0.252145	ZNF385A		Zinc finger protein 385A	Q96PM9	10.1732	10.1941	9.68991	9.62949	9.45125	9.87064	9.24325	10.0234	0.207878	0.230331	no
-0.17092	0.598287	3.13e-09	0.252182	GRM7		Metabotropic glutamate receptor 7	Q14831	10.4785	10.3689	10.3931	10.524	10.4319	9.90352	10.3693	10.3762	0.0504127	0.118206	no
0.199415	0.59809	3.13e-09	0.252296	HEATR5A		HEAT repeat-containing protein 5A	Q86XA9	10.0041	10.0853	10.1639	9.55509	10.099	10.0115	10.3511	10.1445	0.173793	0.145625	no
-0.109502	0.597587	3.13e-09	0.252588	DCAF6		DDB1- and CUL4-associated factor 6	Q58WW2	12.9401	12.7477	12.7086	12.8411	12.7368	12.5516	12.9066	12.6046	0.0723519	0.0944851	no
-0.280382	0.597446	3.13e-09	0.25267	SH3BGR		SH3 domain-binding glutamic acid-rich protein	P55822	9.15271	9.42681	9.22043	9.18663	8.91777	9.51839	8.87436	8.55452	0.0884836	0.208584	no
-0.0999436	0.59713	3.13e-09	0.252854	NUDT16		U8 snoRNA-decapping enzyme	Q96DE0	13.0307	12.9537	12.963	12.9063	12.9161	12.6538	13.0383	12.8457	0.0357123	0.0812955	no
0.137134	0.597087	3.13e-09	0.252879	FGF2		Fibroblast growth factor 2	P09038	12.0863	12.292	12.2603	11.9046	12.5132	12.2305	12.2191	12.1289	0.120613	0.122581	no
-0.275898	0.596922	3.13e-09	0.252975	RNASEH1		Ribonuclease H1	O60930	12.6428	12.2665	12.4645	11.8938	11.5125	12.4076	11.8598	12.3841	0.212396	0.246187	no
0.171317	0.596221	3.13e-09	0.253384	SSBP4		Single-stranded DNA-binding protein 4	Q9BWG4	11.6316	11.675	11.9143	11.3221	12.0561	11.5846	11.8375	11.75	0.165461	0.152626	no
0.171692	0.595554	3.13e-09	0.253773	NIF3L1		NIF3-like protein 1	Q9GZT8	13.3601	13.5242	13.5489	13.164	13.8668	13.1955	13.6521	13.5696	0.11956	0.16366	no
0.0785719	0.595076	3.13e-09	0.254053	GINS2		DNA replication complex GINS protein PSF2	Q9Y248	13.3004	13.225	13.405	13.1571	13.3693	13.4247	13.2876	13.3202	0.0742002	0.0618354	no
0.141163	0.594034	3.13e-09	0.254663	TRAPPC11		Trafficking protein particle complex subunit 11	Q7Z392	11.5778	11.868	11.521	12.0181	11.8422	11.9673	11.8128	11.9274	0.165039	0.11864	no
-0.0486764	0.593503	3.13e-09	0.254975	EIF3M		Eukaryotic translation initiation factor 3 subunit M	Q7L2H7	16.052	16.0354	16.0024	16.1087	16.0299	16.0363	15.9438	15.9938	0.0309683	0.0332215	no
-0.0502657	0.592803	3.13e-09	0.255386	PDIA4		Protein disulfide-isomerase A4	P13667	18.1098	18.0681	18.1259	18.1731	18.0678	18.1055	17.9999	18.1026	0.0300945	0.034862	no
-0.122144	0.592541	3.13e-09	0.25554	ERCC2		General transcription and DNA repair factor IIH helicase subunit XPD	P18074	12.3475	12.3033	12.3706	12.3061	12.158	12.5169	12.0448	12.1192	0.0227735	0.106561	no
0.0695241	0.592406	3.13e-09	0.25562	AGO2		Protein argonaute-2	Q9UKV8	13.6897	13.736	13.6434	13.6018	13.781	13.6105	13.7999	13.7576	0.0402251	0.0535362	no
0.0510431	0.592362	3.13e-09	0.255646	RUFY1		RUN and FYVE domain-containing protein 1	Q96T51	14.5623	14.5598	14.6098	14.6139	14.6839	14.5688	14.6697	14.6276	0.020386	0.033107	no
0.0585526	0.59217	3.13e-09	0.255759	YTHDF2		YTH domain-containing family protein 2	Q9Y5A9	13.0406	13.057	13.0022	12.9965	13.0956	13.0215	13.0873	13.1262	0.0204446	0.0324901	no
0.0882152	0.591779	3.13e-09	0.255989	PLD3		5'-3' exonuclease PLD3	Q8IV08	14.07	14.1233	14.137	14.08	14.3997	14.0389	14.1482	14.1763	0.0226173	0.0819954	no
0.553561	0.591583	3.13e-09	0.256104	TFR2		Transferrin receptor protein 2	Q9UP52	9.50275	7.42183	9.21615	8.6145	8.87454	9.95932	8.93907	9.19655	0.514399	0.437871	no
-0.0469039	0.591577	3.13e-09	0.256108	CHERP		Calcium homeostasis endoplasmic reticulum protein	Q8IWX8	14.8799	14.881	14.8515	14.903	14.8886	14.8385	14.7939	14.8068	0.0145989	0.0273989	no
0.0635032	0.590696	3.13e-09	0.256628	PES1		Pescadillo homolog	O00541	13.2388	13.2844	13.1424	13.1807	13.3272	13.2995	13.2242	13.2492	0.0434879	0.0423289	no
-0.436422	0.590305	3.13e-09	0.256859	ASTE1		Protein asteroid homolog 1	Q2TB18	9.81935	10.9477	10.6653	11.3	9.40735	10.3289	10.5446	10.7059	0.385968	0.384316	no
0.0984771	0.590205	3.13e-09	0.256918	RPS2		40S ribosomal protein S2	P15880	16.7935	16.8487	16.8725	16.6631	17.1119	16.9075	16.7554	16.797	0.0634617	0.0949968	no
-0.0665527	0.589978	3.13e-09	0.257053	DYNLT1		Dynein light chain Tctex-type 1	P63172	14.9286	14.7692	14.8789	14.7615	14.7605	14.8332	14.677	14.8014	0.057394	0.0545333	no
-0.29204	0.5898	3.13e-09	0.257158	NCOA6		Nuclear receptor coactivator 6	Q14686	14.1987	13.8974	13.6989	14.0067	12.8716	14.1215	13.7441	13.8963	0.144357	0.236193	no
-0.131313	0.588904	3.13e-09	0.257689	PYCARD		Apoptosis-associated speck-like protein containing a CARD	Q9ULZ3	11.5638	11.6817	11.7923	11.8526	11.4296	11.4445	11.7015	11.7896	0.0872322	0.109621	no
0.157362	0.588421	3.13e-09	0.257976	ZNRD2		Protein ZNRD2	O60232	15.8423	15.7917	15.9076	15.4719	16.1148	15.5978	16.0904	15.8399	0.126657	0.149469	no
0.0475587	0.588244	3.13e-09	0.258081	ATP6V1A		V-type proton ATPase catalytic subunit A	P38606	16.479	16.4332	16.5389	16.4657	16.5742	16.4928	16.547	16.4931	0.0308481	0.0324956	no
0.10565	0.587912	3.13e-09	0.258278	RPS19BP1		Active regulator of SIRT1	Q86WX3	13.1608	13.3805	13.1611	13.0021	13.2024	13.1811	13.3401	13.4035	0.109381	0.0936724	no
-0.107962	0.587849	3.13e-09	0.258316	POLR2J		DNA-directed RNA polymerase II subunit RPB11-a	P52435	11.8237	11.8153	11.673	11.8366	11.6728	11.7991	11.4752	11.7697	0.0517132	0.0808863	no
-0.146887	0.587841	3.13e-09	0.25832	TELO2		Telomere length regulation protein TEL2 homolog	Q9Y4R8	13.5223	13.459	13.4845	13.6416	13.4124	13.7215	13.319	13.0669	0.0571029	0.133784	no
0.116652	0.587792	3.13e-09	0.25835	COX6B1		Cytochrome c oxidase subunit 6B1	P14854	13.7609	13.6422	13.9681	13.6702	14.0939	13.7059	13.8382	13.87	0.105666	0.111149	no
-0.381461	0.587699	3.13e-09	0.258405	RNF213		E3 ubiquitin-protein ligase RNF213	Q63HN8	13.1465	14.5588	12.9789	12.969	13.0563	13.0813	13.0276	12.9621	0.640187	0.539257	no
0.0854022	0.587602	3.13e-09	0.258463	GALC		Galactocerebrosidase	P54803	12.4324	12.5125	12.6193	12.4582	12.733	12.5422	12.516	12.5726	0.0583166	0.0676905	no
-0.0961508	0.587579	3.13e-09	0.258476	WDR3		WD repeat-containing protein 3	Q9UNX4	13.3578	13.1999	13.3092	13.2483	13.198	13.3783	13.0124	13.1421	0.0478745	0.0821277	no
0.0754381	0.58722	3.13e-09	0.25869	ETF1		Eukaryotic peptide chain release factor subunit 1	P62495	17.1427	17.0736	17.1878	16.978	17.2963	17.1813	17.1451	17.061	0.0626337	0.0669261	no
0.927019	0.586805	3.13e-09	0.258938	TBC1D22B		TBC1 domain family member 22B	Q9NU19	12.2872	12.5459	13.1447	12.1198	16.1377	12.6369	12.9843	12.0469	0.335918	1.62177	no
0.0890357	0.586732	3.13e-09	0.258981	UFM1		Ubiquitin-fold modifier 1	P61960	13.7484	13.7258	13.8524	13.6769	13.9547	13.6493	13.9215	13.8342	0.0519322	0.0781883	no
0.140356	0.585796	3.13e-09	0.25954	KCTD15		BTB/POZ domain-containing protein KCTD15	Q96SI1	11.8334	11.9225	11.5448	11.6638	12.114	11.6809	11.9161	11.815	0.116468	0.125539	no
0.239814	0.584979	3.13e-09	0.260029	RBM14		RNA-binding protein 14	Q96PK6	13.6579	13.7204	13.785	13.0151	14.2262	13.5458	13.8215	13.5442	0.218117	0.230033	no
-0.0502724	0.584613	3.13e-09	0.260248	NCBP1		Nuclear cap-binding protein subunit 1	Q09161	14.6253	14.6522	14.5713	14.6753	14.5917	14.5959	14.5254	14.6099	0.0307975	0.0323463	no
-0.205834	0.584406	3.13e-09	0.260372	HAGHL		Hydroxyacylglutathione hydrolase-like protein	Q6PII5	11.4095	11.2369	11.2715	11.5441	10.7482	10.9693	11.4291	11.4921	0.0988672	0.176553	no
0.171053	0.582999	3.13e-09	0.261216	DUS4L		tRNA-dihydrouridine(20a/20b) synthase [NAD(P)+]-like	O95620	11.7846	11.8358	11.7122	12.1924	12.1964	12.2458	12.0582	11.7089	0.156797	0.159369	no
-0.470469	0.582959	3.13e-09	0.261241	TAF5L		TAF5-like RNA polymerase II p300/CBP-associated factor-associated factor 65 kDa subunit 5L	O75529	8.19475	7.50625	8.12181	8.16846	7.61341	8.32477	6.96796	7.20327	0.202279	0.32697	no
0.143725	0.582889	3.13e-09	0.261283	SETD7		Histone-lysine N-methyltransferase SETD7	Q8WTS6	11.2986	11.6167	11.8848	11.4847	11.7694	11.6315	11.7043	11.7545	0.173677	0.12216	no
0.230454	0.582452	3.13e-09	0.261546	PTPRA		Receptor-type tyrosine-protein phosphatase alpha	P18433	9.26498	9.02614	9.69086	9.32111	9.28592	9.61314	9.77545	9.5504	0.196439	0.173698	no
-0.0497373	0.582184	3.13e-09	0.261707	TBC1D15		TBC1 domain family member 15	Q8TC07	14.2061	14.2291	14.2168	14.274	14.242	14.1656	14.1712	14.1484	0.0208505	0.0296001	no
0.0932105	0.581893	3.13e-09	0.261883	IFI35		Interferon-induced 35 kDa protein	P80217	14.0119	14.1283	14.1391	14.2141	14.1855	14.029	14.3764	14.2753	0.0573053	0.085176	no
-0.0655549	0.581715	3.13e-09	0.26199	TUBB4B		Tubulin beta-4B chain	P68371	21.2297	21.1997	21.1515	21.3074	21.1796	21.2174	21.0669	21.162	0.0456044	0.0480369	no
-0.600312	0.581677	3.13e-09	0.262013	ESRP1		Epithelial splicing regulatory protein 1	Q6NXG1	7.25602	8.03142	6.81501	8.87305	7.52071	7.06468	7.0797	6.90917	0.640725	0.612592	no
-0.0890102	0.581537	3.13e-09	0.262098	SMARCD2		SWI/SNF-related matrix-associated actin-dependent regulator of chromatin subfamily D member 2	Q92925	13.415	13.3875	13.3321	13.3593	13.3126	13.4829	13.1757	13.1666	0.0247658	0.0755703	no
-0.693508	0.581121	3.13e-09	0.262349	ASAP3		Arf-GAP with SH3 domain, ANK repeat and PH domain-containing protein 3	Q8TDY4	11.9789	11.8125	12.0027	12.0687	9.15891	12.0506	12.0422	11.8372	0.0737042	0.347491	no
-0.246784	0.579958	3.13e-09	0.263053	CDAN1		Codanin-1	Q8IWY9	11.6765	11.7009	11.4417	11.6844	11.4606	11.8447	11.4814	10.7297	0.0817957	0.202033	no
0.104483	0.57959	3.13e-09	0.263275	YPEL5		Protein yippee-like 5	P62699	11.9795	11.9932	11.8141	12.1835	12.1437	12.137	11.9846	12.1229	0.105362	0.0836465	no
0.128313	0.578907	3.13e-09	0.26369	TFAM		Transcription factor A, mitochondrial	Q00059	13.0424	13.0797	12.6363	13.1763	13.1255	13.0552	13.1566	13.1107	0.153713	0.107414	no
0.276311	0.577614	3.13e-09	0.264476	ACSL3		Long-chain-fatty-acid--CoA ligase 3	O95573	8.57018	9.1294	8.63557	8.79069	9.28479	9.25095	8.60635	9.089	0.181982	0.206608	no
-0.33087	0.577434	3.13e-09	0.264585	SMAD3		Mothers against decapentaplegic homolog 3	P84022	11.3997	12.0057	11.7009	11.4461	11.4161	11.6523	10.4248	11.7358	0.200484	0.2678	no
0.0929601	0.577316	3.13e-09	0.264657	SNX8		Sorting nexin-8	Q9Y5X2	12.0422	12.0683	11.8678	12.078	12.1517	11.9843	12.211	12.0812	0.0662087	0.0706876	no
0.245369	0.57669	3.13e-09	0.265039	TUBGCP6		Gamma-tubulin complex component 6	Q96RT7	10.2604	10.5909	10.6939	9.93935	10.5952	10.9422	10.2128	10.7159	0.22666	0.217006	no
-0.189355	0.576604	3.13e-09	0.265092	NCS1		Neuronal calcium sensor 1	P62166	10.7526	11.1895	10.9746	10.9769	10.4189	10.6811	11.0574	10.9787	0.123278	0.1613	no
-0.138413	0.576496	3.13e-09	0.265157	RRP7A		Ribosomal RNA-processing protein 7 homolog A	Q9Y3A4	11.3511	11.2315	11.1732	11.2682	11.2211	11.353	11.042	10.8542	0.051928	0.110041	no
0.100884	0.576446	3.13e-09	0.265188	SLC3A2		4F2 cell-surface antigen heavy chain	P08195	12.4051	12.3065	12.2902	12.377	12.3689	12.3198	12.6781	12.4155	0.0382592	0.0912382	no
-0.0993999	0.5763	3.13e-09	0.265277	SPTB		Spectrin beta chain, erythrocytic	P11277	13.7656	13.9253	13.6102	13.9302	13.7927	13.6821	13.5767	13.7822	0.103152	0.0907271	no
-0.0616177	0.576292	3.13e-09	0.265282	EIF4A3		Eukaryotic initiation factor 4A-III	P38919	15.6253	15.5321	15.5525	15.653	15.5239	15.6326	15.4314	15.5286	0.0399894	0.0506189	no
-0.09485	0.576263	3.13e-09	0.2653	SREK1		Splicing regulatory glutamine/lysine-rich protein 1	Q8WXA9	13.2591	13.4604	13.369	13.1232	13.1428	13.2412	13.1381	13.3104	0.099727	0.0850666	no
-0.635644	0.576242	3.13e-09	0.265313	DIAPH2		Protein diaphanous homolog 2	O60879	8.16465	6.69043	7.04296	8.47799	7.02678	6.50612	7.63027	6.67028	0.554573	0.560949	no
-0.142157	0.576168	3.13e-09	0.265358	ARHGEF2		Rho guanine nucleotide exchange factor 2	Q92974	14.2938	14.2769	14.2471	14.2468	14.2185	14.361	13.7194	14.1969	0.0161225	0.121342	no
-0.216373	0.576084	3.13e-09	0.265409	TATDN2		Putative deoxyribonuclease TATDN2	Q93075	9.82462	9.60677	10.0259	9.76461	9.71269	9.15539	9.76117	9.72714	0.121321	0.158117	no
-0.0825992	0.575601	3.13e-09	0.265705	MON1B		Vacuolar fusion protein MON1 homolog B	Q7L1V2	12.0497	12.1715	12.1437	12.1638	12.0739	11.9728	11.98	12.1717	0.0383015	0.0575737	no
0.137552	0.575106	3.13e-09	0.266007	EDF1		Endothelial differentiation-related factor 1	O60869	14.9538	15.0318	15.0923	14.7715	15.3758	14.8164	15.1703	15.0371	0.0939484	0.136979	no
0.357617	0.57435	3.13e-09	0.266471	PLEKHO2		Pleckstrin homology domain-containing family O member 2	Q8TD55	7.76653	8.65037	8.3503	7.90539	8.11179	8.40288	8.76605	8.82233	0.284956	0.262982	no
0.0925812	0.574182	3.13e-09	0.266574	CHAF1B		Chromatin assembly factor 1 subunit B	Q13112	13.2382	13.2994	13.35	13.2135	13.5287	13.1782	13.4389	13.3256	0.0428375	0.0833279	no
-0.257626	0.574125	3.13e-09	0.266609	TRPC4AP		Short transient receptor potential channel 4-associated protein	Q8TEL6	10.1646	10.0258	10.4789	10.7514	10.2495	10.3668	9.58405	10.1899	0.228892	0.228605	no
-0.14729	0.573511	3.13e-09	0.266986	FHOD1		FH1/FH2 domain-containing protein 1	Q9Y613	14.4258	14.321	14.3452	14.2372	14.1717	14.5715	14.0982	13.8986	0.0537661	0.141345	no
0.362732	0.573145	3.13e-09	0.267212	GOLGA4		Golgin subfamily A member 4	Q13439	12.5925	11.6995	11.5836	11.1053	12.711	11.873	11.9636	11.8842	0.466586	0.373127	no
-0.167549	0.573097	3.13e-09	0.267241	NUBP1		Cytosolic Fe-S cluster assembly factor NUBP1	P53384	11.1432	11.5652	11.5651	11.4879	11.2287	11.2107	11.0509	11.6008	0.130622	0.150819	no
-0.194967	0.572974	3.13e-09	0.267317	NRBF2		Nuclear receptor-binding factor 2	Q96F24	11.9806	12.3331	11.5582	12.0305	11.8591	11.5041	11.7647	11.9946	0.214029	0.189084	no
-0.892335	0.572015	3.13e-09	0.267908	CYRIA		CYFIP-related Rac1 interactor A	Q9H0Q0	11.3084	11.3087	9.99135	12.0014	7.83996	11.4458	11.0626	10.6922	0.493919	0.55451	no
0.0732383	0.571582	3.13e-09	0.268175	PRKCSH		Glucosidase 2 subunit beta	P14314	18.4375	18.488	18.4762	18.3319	18.4639	18.3732	18.6133	18.576	0.0482909	0.0652586	no
-0.381242	0.57156	3.13e-09	0.268189	ADPRM		Manganese-dependent ADP-ribose/CDP-alcohol diphosphatase	Q3LIE5	9.40765	9.81281	9.31299	9.62372	8.55708	9.85038	8.58825	9.63649	0.157258	0.308639	no
0.079373	0.571149	3.13e-09	0.268443	PCBP2		Poly(rC)-binding protein 2	Q15366	19.0414	19.0954	19.1108	18.9511	19.2991	19.0016	19.1124	19.1031	0.0493085	0.0734625	no
0.417925	0.570338	3.13e-09	0.268944	PRKAR1B		cAMP-dependent protein kinase type I-beta regulatory subunit	P31321	11.2656	11.2644	11.6048	10.0507	12.1943	11.1819	11.4425	11.0385	0.380664	0.391232	yes
0.132982	0.570088	3.13e-09	0.269099	EEF1A2		Elongation factor 1-alpha 2	Q05639	14.3876	14.5172	14.5754	14.2754	14.8822	14.3363	14.5412	14.5279	0.0921338	0.136356	no
0.120312	0.569288	3.13e-09	0.269595	ISYNA1		Inositol-3-phosphate synthase 1	Q9NPH2	17.5564	17.6158	17.6664	17.433	17.9249	17.4037	17.7527	17.6716	0.0685338	0.1193	no
0.0899737	0.569025	3.13e-09	0.269759	EEF1A1		Elongation factor 1-alpha 1	P68104	21.3976	21.3589	21.3949	21.2106	21.6046	21.4603	21.3357	21.3214	0.0595743	0.0810004	no
0.0599923	0.568222	3.13e-09	0.270258	UCK2		Uridine-cytidine kinase 2	Q9BZX2	14.047	14.0986	14.0465	14.0587	14.2374	14.1049	14.0349	14.1137	0.0171768	0.0469691	yes
0.124898	0.567916	3.13e-09	0.270448	ADSS1		Adenylosuccinate synthetase isozyme 1	Q8N142	11.7665	11.8045	11.721	12.1646	11.9054	11.939	12.1098	12.002	0.149625	0.111956	no
-0.222809	0.567772	3.13e-09	0.270538	PGR		Progesterone receptor	P06401	10.6407	10.2859	10.3788	10.4205	10.439	10.5813	9.74827	10.0661	0.107305	0.184736	no
0.83898	0.567617	3.13e-09	0.270634	CHFR		E3 ubiquitin-protein ligase CHFR	Q96EP1	6.02623	6.36214	4.89735	5.49616	5.87331	6.50064	6.32813	7.43572	0.412484	0.555279	no
-0.250839	0.566588	3.13e-09	0.271276	ARHGAP5		Rho GTPase-activating protein 5	Q13017	10.4805	10.4511	10.2268	10.213	10.0969	10.6891	9.96072	9.62136	0.0986859	0.222847	no
-0.111042	0.566477	3.13e-09	0.271346	COG3		Conserved oligomeric Golgi complex subunit 3	Q96JB2	11.7308	11.8752	11.7478	11.8514	11.8249	11.8252	11.4798	11.6312	0.0503064	0.0884254	no
0.100055	0.566347	3.13e-09	0.271427	ENOSF1		Mitochondrial enolase superfamily member 1	Q7L5Y1	12.642	12.8278	12.7865	12.885	12.8448	12.72	13.0681	12.9086	0.0704401	0.090167	no
-0.201819	0.565476	3.13e-09	0.271972	MTMR1		Myotubularin-related protein 1	Q13613	10.7278	10.6762	10.5437	10.7865	10.3723	11.0057	10.246	10.303	0.0705483	0.18493	no
0.0561939	0.56462	3.13e-09	0.272509	KPNA3		Importin subunit alpha-4	O00505	15.0326	15.0148	15.0862	15.1383	15.0964	15.05	15.2015	15.1489	0.0389422	0.0445223	no
0.0687056	0.564442	3.13e-09	0.27262	MRPS35		28S ribosomal protein S35, mitochondrial	P82673	12.9854	12.9619	13.0708	13.0855	12.9889	13.1687	13.0949	13.126	0.0425034	0.0512647	no
-0.0659915	0.564271	3.13e-09	0.272728	TBC1D5		TBC1 domain family member 5	Q92609	13.4426	13.4459	13.376	13.5855	13.4442	13.4082	13.3873	13.3462	0.0621638	0.0518678	no
0.103836	0.564033	3.13e-09	0.272877	CPSF4		Cleavage and polyadenylation specificity factor subunit 4	O95639	11.5132	11.7934	11.7297	11.8234	11.9248	11.8536	11.7528	11.744	0.0933143	0.0808757	no
0.205849	0.563936	3.13e-09	0.272938	GALE		UDP-glucose 4-epimerase	Q14376	15.754	15.8321	15.7185	14.9572	15.946	15.6855	15.6929	15.761	0.243926	0.173722	no
-0.143755	0.563928	3.13e-09	0.272943	TAF12		Transcription initiation factor TFIID subunit 12	Q16514	10.8866	10.6551	10.8623	10.8125	10.5418	10.9626	10.5873	10.5497	0.0701065	0.116335	no
-0.0927777	0.563264	3.13e-09	0.273361	INTS7		Integrator complex subunit 7	Q9NVH2	12.0602	12.0789	12.1747	12.0083	11.9686	12.1651	11.9413	11.876	0.0486822	0.073251	no
-0.277612	0.563245	3.13e-09	0.273373	ARHGEF6		Rho guanine nucleotide exchange factor 6	Q15052	10.3325	10.508	9.75291	9.70886	9.86618	10.1115	9.87477	9.33935	0.278684	0.259609	no
-0.129572	0.563198	3.13e-09	0.273402	UBR3		E3 ubiquitin-protein ligase UBR3	Q6ZT12	12.4979	12.4105	12.3384	12.4938	12.2103	12.5855	12.0456	12.381	0.0521696	0.115823	no
-0.741354	0.563198	3.13e-09	0.273402	CPS1		Carbamoyl-phosphate synthase [ammonia], mitochondrial	P31327	10.2582	7.7238	7.52479	8.34961	8.5743	8.01317	7.4279	6.8756	1.01906	1.00127	no
-0.129356	0.563103	3.13e-09	0.273462	CEP76		Centrosomal protein of 76 kDa	Q8TAP6	12.0614	11.9894	12.0422	11.8795	11.7262	12.0904	12.0087	11.6298	0.0555383	0.111604	no
-0.062273	0.562646	3.13e-09	0.27375	FAM184B		Protein FAM184B	Q9ULE4	15.6111	15.5595	15.6124	15.6373	15.4371	15.4783	15.6389	15.6168	0.0225011	0.0518212	no
-0.0925572	0.562543	3.13e-09	0.273815	RPL4		60S ribosomal protein L4	P36578	18.3166	18.3449	18.2078	18.5135	18.1585	18.422	18.155	18.2771	0.0889958	0.0893669	no
0.184805	0.562128	3.13e-09	0.274077	MAGEA9		Melanoma-associated antigen 9	P43362	10.5857	9.97316	10.2913	10.1182	10.3131	10.3825	10.6818	10.3302	0.187828	0.158614	no
-0.155717	0.561963	3.13e-09	0.274181	ASAP1		Arf-GAP with SH3 domain, ANK repeat and PH domain-containing protein 1	Q9ULH1	11.2905	11.3411	11.4933	11.5297	11.3036	11.5174	10.8961	11.3145	0.0800577	0.13099	no
-0.155216	0.561717	3.13e-09	0.274336	EIF2B4		Translation initiation factor eIF-2B subunit delta	Q9UI10	14.3439	14.5989	14.5844	14.8078	14.6208	14.6694	14.1724	14.2516	0.130349	0.150615	no
-0.221603	0.56164	3.13e-09	0.274385	SRR		Serine racemase	Q9GZT4	8.81172	8.99688	8.76324	8.9373	8.6649	8.68883	8.79775	8.47126	0.0751351	0.111905	no
0.113946	0.561294	3.13e-09	0.274604	ABL1		Tyrosine-protein kinase ABL1	P00519	12.0507	12.1976	12.0283	11.84	12.3358	12.146	12.0636	12.0271	0.100618	0.101223	yes
-0.0878097	0.561052	3.13e-09	0.274757	FTL		Ferritin light chain	P02792	12.3485	12.402	12.3344	12.5705	12.2071	12.4078	12.369	12.3203	0.0773639	0.0723	no
-0.0990627	0.560651	3.13e-09	0.27501	IKZF1		DNA-binding protein Ikaros	Q13422	11.3029	11.2241	11.3546	11.4109	11.2381	11.1248	11.3557	11.1774	0.0547337	0.0681043	no
0.142353	0.560431	3.13e-09	0.27515	PAFAH1B2		Platelet-activating factor acetylhydrolase IB subunit beta	P68402	16.1854	16.104	16.5109	15.8772	16.4869	16.1994	16.3142	16.2464	0.185996	0.139808	no
0.342058	0.560118	3.13e-09	0.275348	RBM20		RNA-binding protein 20	Q5T481	8.44524	8.25346	9.03454	7.88108	8.6932	8.46824	8.72266	9.09845	0.348169	0.268841	no
-0.0888309	0.560024	3.13e-09	0.275408	RNASEH2B		Ribonuclease H2 subunit B	Q5TBB1	13.0811	13.1115	13.1287	13.169	12.9994	13.2513	12.9023	12.9821	0.0254685	0.0776245	no
-0.158849	0.559792	3.13e-09	0.275555	INTS8		Integrator complex subunit 8	Q75QN2	11.2947	11.1381	10.9549	10.9637	10.8065	11.2492	10.7188	10.9414	0.114172	0.142106	no
0.0651408	0.559409	3.13e-09	0.275798	EZR		Ezrin	P15311	17.338	17.3137	17.3619	17.3995	17.4273	17.2704	17.5327	17.4433	0.0254205	0.0580862	no
-0.419904	0.558684	3.13e-09	0.276259	KIF3B		Kinesin-like protein KIF3B	O15066	9.15528	9.74328	9.96407	9.77609	8.82765	10.1794	8.47644	9.47558	0.219837	0.369019	no
-0.0904249	0.558301	3.13e-09	0.276502	ESF1		ESF1 homolog	Q9H501	11.8989	11.8199	11.736	11.8794	11.8023	11.746	11.8297	11.5945	0.0501039	0.0652254	no
-0.0666902	0.55798	3.13e-09	0.276707	N6AMT1		Methyltransferase N6AMT1	Q9Y5N5	12.4784	12.3824	12.4456	12.4606	12.2875	12.4099	12.4094	12.3934	0.0286607	0.0403184	no
0.134142	0.557976	3.13e-09	0.276709	RABIF		Guanine nucleotide exchange factor MSS4	P47224	13.6849	13.6365	13.7665	13.2694	13.7554	13.534	13.9049	13.6994	0.142747	0.124301	no
0.160696	0.557865	3.13e-09	0.27678	FLOT2		Flotillin-2	Q14254	10.7997	11.1586	10.5689	11.0972	11.0922	11.0844	10.9417	11.1489	0.184132	0.132814	no
0.0517136	0.557705	3.13e-09	0.276882	TUBA1C		Tubulin alpha-1C chain	Q9BQE3	18.4048	18.4983	18.5106	18.5014	18.5743	18.5855	18.4735	18.4888	0.0337964	0.0393351	no
0.188948	0.557216	3.13e-09	0.277194	PROS1		Vitamin K-dependent protein S	P07225	9.73087	10.1678	9.48091	9.77114	9.89031	10.067	10.005	9.94418	0.203745	0.145018	no
0.133405	0.556971	3.13e-09	0.277351	PDCD5		Programmed cell death protein 5	O14737	17.1852	17.3675	17.3471	17.228	17.6247	17.0387	17.4993	17.4987	0.0616045	0.131857	no
-0.211882	0.555593	3.13e-09	0.278232	UBXN6		UBX domain-containing protein 6	Q9BZV1	9.38908	9.70538	9.70428	9.54106	9.25375	9.75574	9.10551	9.37727	0.102799	0.160346	no
-0.117544	0.555577	3.13e-09	0.278242	LMAN1		Protein ERGIC-53	P49257	11.2396	11.4023	11.3187	11.261	11.2194	11.417	11.0547	11.0604	0.050999	0.0936336	no
-1.36414	0.555512	3.13e-09	0.278284	RPS6KA6		Ribosomal protein S6 kinase alpha-6	Q9UK32	12.7546	12.3708	12.3645	12.3297	12.7703	6.77162	12.6849	12.1361	0.148185	0.434428	yes
0.113941	0.555382	3.13e-09	0.278367	PPP1R14A		Protein phosphatase 1 regulatory subunit 14A	Q96A00	13.0449	13.3255	13.4263	13.4912	13.3782	13.5639	13.4645	13.3371	0.130091	0.102835	no
0.0896431	0.555211	3.13e-09	0.278477	NBN		Nibrin	O60934	14.1648	13.9691	14.0492	13.9356	14.2702	14.1746	14.0749	13.9576	0.0716973	0.0843404	no
-0.234719	0.555183	3.13e-09	0.278495	PRPF18		Pre-mRNA-splicing factor 18	Q99633	10.389	10.884	11.2703	10.5484	10.2576	10.833	10.5513	10.511	0.279563	0.242216	no
-0.133782	0.554811	3.13e-09	0.278734	BOLA1		BolA-like protein 1	Q9Y3E2	11.3343	11.3193	11.4152	11.6297	11.4571	11.0554	11.4206	11.2302	0.102835	0.116001	no
0.223281	0.554604	3.13e-09	0.278866	ZNF574		Zinc finger protein 574	Q6ZN55	9.63392	9.43827	9.91895	9.76688	10.2374	10.0695	9.86015	9.48408	0.139787	0.194703	no
0.0747037	0.554434	3.13e-09	0.278975	RPS10		40S ribosomal protein S10	P46783	17.9686	17.972	18.0353	17.8884	18.2007	18.0788	17.9243	17.9592	0.0415379	0.0710447	no
-0.0556603	0.55322	3.13e-09	0.279756	CORO7		Coronin-7	P57737	15.1158	15.1335	15.0596	15.1052	15.0441	15.1599	14.9681	15.0193	0.0217156	0.0442344	no
0.127937	0.553105	3.13e-09	0.27983	VARS2		Valine--tRNA ligase, mitochondrial	Q5ST30	10.8133	10.5399	10.9543	10.8569	10.8333	10.9863	10.9922	10.8644	0.117926	0.0948693	no
-0.0539909	0.552853	3.13e-09	0.279993	GABPA		GA-binding protein alpha chain	Q06546	13.5276	13.4925	13.518	13.5023	13.4049	13.4305	13.5396	13.4495	0.0108822	0.0337784	no
-0.305084	0.55153	3.13e-09	0.280847	PODXL2		Podocalyxin-like protein 2	Q9NZ53	9.33612	9.32078	9.45255	9.31304	9.24882	8.55158	8.67893	9.7228	0.0462333	0.249942	no
-0.160635	0.550796	3.13e-09	0.281322	YARS2		Tyrosine--tRNA ligase, mitochondrial	Q9Y2Z4	13.0239	13.0048	12.9584	12.9049	12.7951	13.267	12.6586	12.5287	0.0365525	0.159046	no
-0.218621	0.550793	3.13e-09	0.281324	REXO1		RNA exonuclease 1 homolog	Q8N1G1	8.90495	9.22551	8.76447	9.10219	8.77632	8.85369	8.65354	8.83907	0.141095	0.135591	no
0.29361	0.550491	3.13e-09	0.28152	SAP30		Histone deacetylase complex subunit SAP30	O75446	10.8274	11.0667	11.1345	10.0339	11.5345	10.98	10.9209	10.8017	0.299184	0.268187	no
-0.500592	0.55007	3.13e-09	0.281793	GTF3C3		General transcription factor 3C polypeptide 3	Q9Y5Q9	12.6796	12.7634	14.8528	12.7421	12.8828	12.8059	12.6265	12.7205	0.912984	0.827178	no
0.0730932	0.549984	3.13e-09	0.281849	ACADVL		Very long-chain specific acyl-CoA dehydrogenase, mitochondrial	P49748	15.0187	15.0647	15.1548	15.0565	15.2129	14.9702	15.2379	15.1662	0.0404698	0.0665818	no
0.105945	0.549267	3.13e-09	0.282315	TUBB		Tubulin beta chain	P07437	20.2097	20.1654	20.2044	19.9092	20.4343	20.2384	20.1627	20.0771	0.0946283	0.102569	no
0.553972	0.5492	3.13e-09	0.282358	MECP2		Methyl-CpG-binding protein 2	P51608	11.0091	13.3334	13.1459	13.5679	13.3524	13.2046	13.3468	13.3683	0.525102	0.329376	no
-0.105838	0.548916	3.13e-09	0.282543	UBL7		Ubiquitin-like protein 7	Q96S82	13.7341	13.6922	13.3746	13.4372	13.5042	13.5612	13.4111	13.3382	0.124139	0.103339	no
0.0873309	0.548395	3.13e-09	0.282882	PPT2		Lysosomal thioesterase PPT2	Q9UMR5	13.7515	13.7362	13.8346	13.6507	14.0255	13.7859	13.8304	13.6805	0.0521748	0.0836713	no
-0.32627	0.548233	3.13e-09	0.282987	CENPF		Centromere protein F	P49454	12.3074	12.1487	12.1242	12.9409	11.2388	12.5873	12.1695	12.2206	0.293288	0.311722	no
-0.085848	0.547083	3.13e-09	0.283738	DDX47		Probable ATP-dependent RNA helicase DDX47	Q9H0S4	12.6976	12.5863	12.5776	12.6273	12.5554	12.6818	12.3604	12.5477	0.038369	0.0699514	no
0.66297	0.546843	3.13e-09	0.283894	DHCR7		7-dehydrocholesterol reductase	Q9UBM7	6.18679	6.99669	7.09599	5.82847	7.26898	7.56999	7.80598	6.11486	0.402299	0.466555	no
-0.191563	0.546686	3.13e-09	0.283997	NAT1		Arylamine N-acetyltransferase 1	P18440	10.1019	10.4676	10.1079	9.94247	9.66027	10.2001	9.89947	10.0938	0.161122	0.164774	no
-0.105303	0.546513	3.13e-09	0.284111	KLHL18		Kelch-like protein 18	O94889	11.947	12.014	11.7297	12.0386	11.8544	11.9504	11.8222	11.681	0.0936148	0.0890675	no
0.262511	0.546062	3.13e-09	0.284406	ZNF281		Zinc finger protein 281	Q9Y2X9	10.4755	11.1555	11.3017	11.7342	11.5399	11.2508	11.5532	11.373	0.338589	0.229798	no
-0.057887	0.54569	3.13e-09	0.284649	RPL36		60S ribosomal protein L36	Q9Y3U8	17.6452	17.6066	17.662	17.7967	17.5812	17.6909	17.5743	17.6325	0.0585547	0.050932	no
0.112589	0.545346	3.13e-09	0.284875	ZWILCH		Protein zwilch homolog	Q9H900	12.3031	12.3455	12.3636	12.0235	12.5727	12.3213	12.3161	12.276	0.104493	0.102286	no
0.0853045	0.545145	3.13e-09	0.285007	SRRM1		Serine/arginine repetitive matrix protein 1	Q8IYB3	12.9814	13.2644	13.0792	13.1254	13.3157	13.0936	13.2306	13.1517	0.082338	0.0759038	no
-0.138283	0.545006	3.13e-09	0.285098	TFEB		Transcription factor EB	P19484	10.2324	10.1524	10.1878	10.4435	10.0905	10.0288	10.2847	10.0589	0.0937078	0.0972106	no
0.0573545	0.544765	3.13e-09	0.285256	TRAPPC4		Trafficking protein particle complex subunit 4	Q9Y296	13.5009	13.4924	13.5589	13.3984	13.5724	13.4919	13.5721	13.5437	0.0456277	0.0399829	no
-0.244	0.544569	3.13e-09	0.285385	MYO19		Unconventional myosin-XIX	Q96H55	10.1116	10.0849	10.0652	10.0926	10.1825	10.2897	9.5085	9.39766	0.0132977	0.201945	no
-0.0779985	0.544341	3.13e-09	0.285535	POLR2B		DNA-directed RNA polymerase II subunit RPB2	P30876	13.6807	13.6722	13.5216	13.7498	13.5945	13.7129	13.4953	13.5096	0.0653116	0.0691057	no
-0.0464104	0.544018	3.13e-09	0.285747	AFDN		Afadin	P55196	13.7915	13.7642	13.8152	13.8461	13.7578	13.7673	13.7438	13.7624	0.0241823	0.024051	no
0.0647626	0.543798	3.13e-09	0.285892	RPL27A		60S ribosomal protein L27a	P46776	18.6625	18.6617	18.7333	18.5825	18.8144	18.8032	18.6468	18.6347	0.0425892	0.0581118	no
0.115915	0.543277	3.13e-09	0.286235	POLR2E		DNA-directed RNA polymerases I, II, and III subunit RPABC1	P19388	12.2695	12.3312	12.4778	12.0505	12.4423	12.5496	12.2515	12.3493	0.120775	0.105448	no
-0.156672	0.542762	3.13e-09	0.286575	DCAF1		DDB1- and CUL4-associated factor 1	Q9Y4B6	13.7956	13.1971	13.2935	13.1152	13.2834	13.2905	13.1022	13.0987	0.229485	0.178762	no
-0.160604	0.54234	3.13e-09	0.286853	MAPK1IP1L		MAPK-interacting and spindle-stabilizing protein-like	Q8NDC0	12.9257	13.1987	12.7201	12.6654	13.0362	12.6892	12.6269	12.5152	0.173499	0.16811	no
-0.0580496	0.541296	3.13e-09	0.287544	MMS19		MMS19 nucleotide excision repair protein homolog	Q96T76	14.3097	14.3276	14.3396	14.3788	14.2309	14.3738	14.1879	14.331	0.0204037	0.0457164	no
0.0562279	0.541293	3.13e-09	0.287546	RPS8		40S ribosomal protein S8	P62241	18.4065	18.4976	18.4776	18.5128	18.5868	18.5867	18.4165	18.5294	0.0321828	0.0469391	no
-0.132687	0.541263	3.13e-09	0.287565	DHTKD1		Probable 2-oxoglutarate dehydrogenase E1 component DHKTD1, mitochondrial	Q96HY7	12.353	12.2559	12.4141	12.1601	12.1521	12.4967	11.9936	12.0099	0.0767096	0.127615	no
0.106466	0.541238	3.13e-09	0.287582	RAD1		Cell cycle checkpoint protein RAD1	O60671	10.7334	10.8656	11.0068	10.7812	10.9269	10.8872	11.0326	10.9663	0.0846098	0.0720023	no
0.23383	0.541219	3.13e-09	0.287595	APOBEC3B		DNA dC->dU-editing enzyme APOBEC-3B	Q9UH17	10.9028	11.3784	11.2574	10.9137	11.9592	11.2339	11.1266	11.0679	0.167952	0.269301	no
-0.08595	0.541175	3.13e-09	0.287624	PNISR		Arginine/serine-rich protein PNISR	Q8TF01	13.224	13.3373	13.3157	13.4682	13.15	13.1426	13.3475	13.3612	0.0704933	0.0777249	no
-0.122884	0.540905	3.13e-09	0.287803	VPS35L		VPS35 endosomal protein sorting factor-like	Q7Z3J2	12.2884	12.1925	12.1838	12.0852	12.086	12.3606	11.8614	11.9504	0.0575153	0.113825	no
-0.103359	0.540634	3.13e-09	0.287983	COX5B		Cytochrome c oxidase subunit 5B, mitochondrial	P10606	13.6871	13.6673	13.6061	13.892	13.4142	13.5427	13.7201	13.762	0.0888224	0.0992842	no
-0.289997	0.54031	3.13e-09	0.288197	USP3		Ubiquitin carboxyl-terminal hydrolase 3	Q9Y6I4	11.425	11.3453	10.9003	11.9245	10.4798	11.3252	11.1503	11.4799	0.293878	0.285597	no
0.10492	0.539931	3.13e-09	0.288449	RSBN1L		Lysine-specific demethylase RSBN1L	Q6PCB5	11.3038	11.6061	11.5796	11.5731	11.5371	11.7355	11.6599	11.5499	0.0936453	0.0832175	no
-0.257754	0.53993	3.13e-09	0.28845	MKLN1		Muskelin	Q9UL63	13.3473	13.3073	12.9497	13.8702	12.5104	13.3389	13.2939	13.3002	0.272804	0.259275	no
-0.496084	0.539622	3.13e-09	0.288654	HERC2		E3 ubiquitin-protein ligase HERC2	O95714	10.9549	9.8259	10.9427	11.6955	10.8134	11.033	10.175	9.41306	0.482596	0.480258	no
0.366746	0.539455	3.13e-09	0.288765	MNX1		Motor neuron and pancreas homeobox protein 1	P50219	8.50144	8.77676	7.70347	7.7568	8.60725	8.49134	8.20876	8.89812	0.368871	0.283419	no
0.0878304	0.538283	3.13e-09	0.289546	WTAP		Pre-mRNA-splicing regulator WTAP	Q15007	12.3854	12.5717	12.5994	12.7319	12.6487	12.6536	12.6039	12.7335	0.0975499	0.0737839	no
-0.256237	0.537666	3.13e-09	0.289957	RAD54B		DNA repair and recombination protein RAD54B	Q9Y620	9.88717	9.75539	9.56642	9.44714	8.78974	9.63954	9.70123	9.50066	0.135479	0.198403	no
0.287634	0.537634	3.13e-09	0.289979	PSMB2		Proteasome subunit beta type-2	P49721	16.5667	16.4473	16.9775	15.743	17.2125	16.4339	16.7456	16.4931	0.329062	0.287272	no
-0.0841955	0.537445	3.13e-09	0.290105	IL18		Interleukin-18	Q14116	13.6238	13.5978	13.6467	13.8318	13.6267	13.4449	13.7213	13.5704	0.0761724	0.0783949	no
0.0488353	0.537219	3.13e-09	0.290256	CHD4		Chromodomain-helicase-DNA-binding protein 4	Q14839	14.5364	14.5065	14.5102	14.4865	14.6489	14.5377	14.5348	14.5135	0.0142502	0.0353273	no
-0.143919	0.537195	3.13e-09	0.290272	PLS1		Plastin-1	Q14651	14.644	14.6568	14.5364	15.103	14.3689	14.5782	14.6408	14.7767	0.186539	0.157806	no
0.114717	0.537193	3.13e-09	0.290273	HDAC6		Histone deacetylase 6	Q9UBN7	14.9022	14.709	15.0445	14.6118	15.0633	14.9522	14.9698	14.741	0.135059	0.112943	no
-0.259349	0.537121	3.13e-09	0.290321	MED26		Mediator of RNA polymerase II transcription subunit 26	O95402	10.4911	10.7363	10.6824	10.5292	10.5753	10.9159	9.7342	10.1764	0.0819194	0.228091	no
0.076448	0.537116	3.13e-09	0.290325	WDR74		WD repeat-containing protein 74	Q6RFH5	12.4372	12.2545	12.3886	12.4387	12.524	12.48	12.3483	12.4724	0.0586057	0.0580948	no
0.172146	0.537054	3.13e-09	0.290366	RAMAC		RNA guanine-N7 methyltransferase activating subunit	Q9BTL3	11.0329	11.2282	11.3116	11.2369	11.7031	10.9513	11.4877	11.3562	0.0801211	0.169801	no
1.0443	0.536896	3.13e-09	0.290472	COQ8A		Atypical kinase COQ8A, mitochondrial	Q8NI60	11.2414	12.1455	11.3012	7.26135	10.7583	11.9248	11.3126	12.1309	0.743224	0.53346	yes
0.141575	0.536703	3.13e-09	0.290601	GPR173		Probable G-protein coupled receptor 173	Q9NS66	11.2444	11.3416	11.3343	10.8836	11.4721	11.3744	11.3915	11.1322	0.139735	0.120837	no
0.0838014	0.536518	3.13e-09	0.290725	SMAD2		Mothers against decapentaplegic homolog 2	Q15796	13.7083	13.6227	13.734	13.4927	13.8152	13.8187	13.669	13.5901	0.0739024	0.0768463	no
-0.0742286	0.536354	3.13e-09	0.290835	PCF11		Pre-mRNA cleavage complex 2 protein Pcf11	O94913	12.5259	12.6034	12.5179	12.5825	12.5548	12.587	12.4103	12.3807	0.0291547	0.056209	no
0.0792937	0.535836	3.13e-09	0.291181	DCXR		L-xylulose reductase	Q7Z4W1	14.9982	14.9434	15.033	14.8197	15.1529	14.886	15.1012	14.9714	0.0635905	0.0755389	no
-0.285182	0.535767	3.13e-09	0.291228	SCAMP2		Secretory carrier-associated membrane protein 2	O15127	10.3644	10.384	10.3765	10.4379	10.3445	10.6341	9.29292	10.1504	0.0227285	0.2248	no
-0.231422	0.535764	3.13e-09	0.29123	MTPAP		Poly(A) RNA polymerase, mitochondrial	Q9NVV4	10.5532	10.2331	10.3201	10.7458	10.3603	10.4023	9.6563	10.5076	0.162985	0.19878	no
-0.125615	0.53571	3.13e-09	0.291266	NKAP		NF-kappa-B-activating protein	Q8N5F7	11.1917	11.6197	11.3425	11.3382	11.4252	11.2544	11.1821	11.1279	0.12782	0.115096	no
0.279314	0.535366	3.13e-09	0.291497	THUMPD2		THUMP domain-containing protein 2	Q9BTF0	10.054	9.43134	8.97755	9.57739	9.43179	9.70457	10.1382	9.883	0.307724	0.252321	no
-0.0941088	0.535099	3.13e-09	0.291676	CRTC2		CREB-regulated transcription coactivator 2	Q53ET0	11.5688	11.6814	11.5237	11.5789	11.3498	11.5039	11.645	11.4776	0.0468157	0.0706678	no
-0.0608357	0.534659	3.13e-09	0.291972	NHP2		H/ACA ribonucleoprotein complex subunit 2	Q9NX24	12.9483	12.9636	12.9983	12.9696	12.8004	12.9647	12.9185	12.9528	0.0145472	0.0405748	no
-0.0465885	0.534175	3.13e-09	0.292298	CBSL;CBS		Cystathionine beta-synthase-like protein;Cystathionine beta-synthase	P0DN79;P35520	15.499	15.4742	15.4717	15.5437	15.3883	15.4238	15.516	15.4741	0.0233154	0.0340532	no
0.195215	0.533678	3.13e-09	0.292632	ALKBH5		RNA demethylase ALKBH5	Q6P6C2	10.8021	10.7947	10.9762	10.1655	11.0135	10.9834	10.7671	10.7554	0.221169	0.163913	no
0.305768	0.533548	3.13e-09	0.29272	RNF187		E3 ubiquitin-protein ligase RNF187	Q5TA31	9.69239	9.78813	9.42777	8.8538	10.2433	9.20182	9.78006	9.75998	0.262137	0.282704	no
-0.0947895	0.532925	3.13e-09	0.29314	WDR92		WD repeat-containing protein 92	Q96MX6	13.0401	12.9543	13.0622	12.9647	13.0369	13.0042	12.9381	12.663	0.0373622	0.0821865	no
0.056748	0.532664	3.13e-09	0.293316	UPF1		Regulator of nonsense transcripts 1	Q92900	16.3224	16.3164	16.3277	16.2731	16.4543	16.2356	16.4179	16.3587	0.0171588	0.0499397	no
0.0967627	0.531992	3.13e-09	0.29377	ACBD7		Acyl-CoA-binding domain-containing protein 7	Q8N6N7	12.5023	12.4184	12.4701	12.6858	12.6284	12.4231	12.6854	12.7267	0.0830004	0.0882194	no
0.0610121	0.531899	3.13e-09	0.293833	GRWD1		Glutamate-rich WD repeat-containing protein 1	Q9BQ67	13.921	13.9834	14.027	13.916	14.118	14.0349	14.0239	13.9145	0.0370422	0.050707	no
0.0866388	0.531857	3.13e-09	0.293862	MRPL50		39S ribosomal protein L50, mitochondrial	Q8N5N7	12.485	12.6251	12.6939	12.5473	12.7714	12.5045	12.6699	12.7521	0.0631548	0.075678	no
0.0553531	0.531371	3.13e-09	0.29419	HCFC1		Host cell factor 1	P51610	16.1274	16.0891	16.132	16.0588	16.2616	16.0804	16.1997	16.0869	0.0238497	0.0487885	no
0.175943	0.531191	3.13e-09	0.294313	NSDHL		Sterol-4-alpha-carboxylate 3-dehydrogenase, decarboxylating	Q15738	9.88923	9.60238	10.008	10.165	10.0538	10.3264	9.95199	10.0361	0.159544	0.142038	no
0.0739047	0.531174	3.13e-09	0.294324	HSDL2		Hydroxysteroid dehydrogenase-like protein 2	Q6YN16	13.2396	13.1348	13.2748	13.0729	13.2863	13.3488	13.2365	13.1462	0.0642788	0.0631607	no
0.146433	0.531086	3.13e-09	0.294384	DDX50		ATP-dependent RNA helicase DDX50	Q9BQ39	12.0032	11.9429	12.0222	11.6117	12.29	12.1507	11.9309	11.794	0.124806	0.142089	no
0.764908	0.530733	3.13e-09	0.294623	GRM5		Metabotropic glutamate receptor 5	P41594	5.84083	7.00974	7.16505	8.51053	6.4398	7.94866	8.80781	8.38951	0.765256	0.635625	no
-0.0668584	0.530685	3.13e-09	0.294656	VAC14		Protein VAC14 homolog	Q08AM6	13.5054	13.4967	13.6591	13.5722	13.4844	13.3806	13.5338	13.5672	0.0527707	0.055871	no
0.132357	0.529786	3.13e-09	0.295267	TJAP1		Tight junction-associated protein 1	Q5JTD0	13.3053	13.4221	13.8293	13.4977	13.4194	13.6875	13.6797	13.7971	0.163233	0.133953	no
-0.890753	0.529633	3.13e-09	0.29537	TRIML2		Probable E3 ubiquitin-protein ligase TRIML2	Q8N7C3	9.89178	10.2162	10.5497	10.1487	6.44974	10.546	10.3803	9.86726	0.191074	0.422277	no
0.0988414	0.529352	3.13e-09	0.295562	PRDX1		Peroxiredoxin-1	Q06830	19.3166	19.4481	19.4156	19.3337	19.6634	19.2091	19.5112	19.5255	0.0440061	0.0991013	no
0.222389	0.529242	3.13e-09	0.295637	MAP3K7		Mitogen-activated protein kinase kinase kinase 7	O43318	12.7577	13.0608	12.8857	12.5072	13.6274	12.6534	12.9076	12.9126	0.158407	0.264064	yes
1.13696	0.529179	3.13e-09	0.295679	SERGEF		Secretion-regulating guanine nucleotide exchange factor	Q9UGK8	3.84094	8.63276	8.80329	6.31714	7.40096	8.36808	8.53861	7.83434	0.93408	0.617339	no
0.164386	0.528913	3.13e-09	0.295861	DGUOK		Deoxyguanosine kinase, mitochondrial	Q16854	9.85403	9.58584	9.98373	9.62754	10.0564	9.74702	10.023	9.88231	0.13183	0.12088	no
-0.549752	0.528686	3.13e-09	0.296015	UBE2Q1		Ubiquitin-conjugating enzyme E2 Q1	Q7Z7E8	15.6043	15.7005	15.5719	15.7533	15.72	13.2909	15.7404	15.6797	0.0583661	0.322078	no
-0.262178	0.52818	3.13e-09	0.29636	FBXO2		F-box only protein 2	Q9UK22	9.23132	9.22776	9.82908	9.79109	9.31822	9.5183	9.42755	8.76646	0.229653	0.2283	no
0.141792	0.528172	3.13e-09	0.296366	DLG1		Disks large homolog 1	Q12959	11.1051	11.4578	11.5327	11.5777	11.5782	11.3175	11.6925	11.6523	0.13918	0.126336	no
-0.0882683	0.528071	3.13e-09	0.296435	TBC1D9B		TBC1 domain family member 9B	Q66K14	11.3224	11.4051	11.5294	11.5588	11.3379	11.3494	11.3801	11.3952	0.0756576	0.0623589	no
-0.318984	0.527871	3.13e-09	0.296571	USP13		Ubiquitin carboxyl-terminal hydrolase 13	Q92995	9.54873	9.92739	9.58589	10.0117	9.93292	9.92792	9.22389	8.71304	0.162669	0.269142	no
0.078653	0.527536	3.13e-09	0.2968	MRPL52		39S ribosomal protein L52, mitochondrial	Q86TS9	13.4271	13.5274	13.4309	13.6499	13.5762	13.4511	13.6479	13.6747	0.0740171	0.071774	no
0.105071	0.527453	3.13e-09	0.296856	GUK1		Guanylate kinase	Q16774	13.3216	13.3045	13.3222	13.3053	13.5706	13.5068	13.1076	13.4889	0.00681705	0.10208	yes
0.189072	0.52737	3.13e-09	0.296913	GCDH		Glutaryl-CoA dehydrogenase, mitochondrial	Q92947	11.3148	11.4968	11.5018	10.9341	11.9126	11.4264	11.2755	11.3893	0.172011	0.194376	no
0.189217	0.527318	3.13e-09	0.296949	TARS3		Threonine--tRNA ligase 2, cytoplasmic	A2RTX5	10.5692	10.9024	10.8029	10.1453	10.8256	10.9071	10.576	10.8679	0.217474	0.162736	no
-0.122608	0.527306	3.13e-09	0.296957	YJU2		Splicing factor YJU2	Q9BW85	13.8372	13.9393	13.8667	14.1876	13.8411	13.55	13.9854	13.9638	0.115061	0.122196	no
-0.120402	0.527113	3.13e-09	0.297089	DHRS2		Dehydrogenase/reductase SDR family member 2, mitochondrial	Q13268	12.0418	11.9016	11.91	12.052	11.9528	11.5515	12.0421	11.8776	0.0565419	0.104656	no
-0.146394	0.526897	3.13e-09	0.297237	TFB2M		Dimethyladenosine transferase 2, mitochondrial	Q9H5Q4	12.3618	12.1098	12.2901	12.0801	12.1669	12.3897	11.8751	11.8246	0.0952698	0.142433	no
-0.0623396	0.526779	3.13e-09	0.297318	STAMBP		STAM-binding protein	O95630	13.5612	13.4935	13.508	13.6596	13.5012	13.405	13.555	13.5117	0.0529405	0.0506274	no
0.0862954	0.52552	3.13e-09	0.298181	LTA4H		Leukotriene A-4 hydrolase	P09960	16.853	17.0004	17.0284	16.9401	17.1374	16.8064	17.1332	17.0902	0.0531742	0.0848831	no
-0.0986248	0.525516	3.13e-09	0.298184	TBC1D24		TBC1 domain family member 24	Q9ULP9	11.8291	11.882	11.8312	11.8811	11.7067	12.0009	11.6795	11.6419	0.020572	0.0843901	no
0.0555013	0.525071	3.13e-09	0.298489	CBX5		Chromobox protein homolog 5	P45973	12.9961	13.0429	13.0646	12.9995	13.1514	13.0313	13.0946	13.0478	0.02328	0.0358356	no
-0.0754065	0.52505	3.13e-09	0.298504	GPN1		GPN-loop GTPase 1	Q9HCN4	13.9505	13.9964	13.9992	14.223	13.8716	13.9567	14.0141	14.0251	0.0881029	0.0726789	no
-0.315814	0.524927	3.13e-09	0.298588	GSN		Gelsolin	P06396	11.8779	11.7876	11.867	11.9392	10.9717	12.1534	10.9463	12.137	0.0429624	0.285434	no
0.078442	0.524888	3.13e-09	0.298615	TOP3B		DNA topoisomerase 3-beta-1	O95985	13.1913	13.2103	13.231	13.1349	13.4719	13.2071	13.1826	13.2197	0.0283827	0.0749215	no
-0.0988985	0.523952	3.13e-09	0.299259	HSP90AA1		Heat shock protein HSP 90-alpha	P07900	20.7806	20.866	20.7354	21.1351	20.6615	20.7923	20.7972	20.8704	0.129563	0.103243	no
-0.158531	0.523784	3.13e-09	0.299375	GBA		Lysosomal acid glucosylceramidase	P04062	10.6491	10.7699	10.8464	10.3183	10.7215	10.3595	10.4053	10.4633	0.152609	0.141802	no
-0.141173	0.523742	3.13e-09	0.299404	FAM102B		Protein FAM102B	Q5T8I3	12.765	12.6285	12.6464	12.5605	12.5875	12.7369	12.1012	12.61	0.0597072	0.127295	no
-0.0614563	0.5237	3.13e-09	0.299434	WASHC5		WASH complex subunit 5	Q12768	12.7276	12.7153	12.6329	12.6944	12.6415	12.6996	12.5494	12.634	0.0288668	0.0403336	no
-0.0578055	0.523604	3.13e-09	0.299499	TBCD		Tubulin-specific chaperone D	Q9BTW9	14.0352	14.0211	14.0314	14.1274	14.002	14.0996	13.9164	13.966	0.0348226	0.0468758	no
-0.373577	0.52327	3.13e-09	0.29973	RECQL4		ATP-dependent DNA helicase Q4	O94761	11.3241	11.2607	11.2595	10.132	11.2464	10.1492	10.1229	10.9635	0.319299	0.351277	no
0.177489	0.522801	3.13e-09	0.300054	CCDC117		Coiled-coil domain-containing protein 117	Q8IWD4	9.99629	10.3422	10.4246	9.84968	10.4384	10.2362	10.4904	10.1577	0.187465	0.151208	no
-1.31641	0.522711	3.13e-09	0.300116	VDAC1		Voltage-dependent anion-selective channel protein 1	P21796	13.5359	12.9935	9.86224	9.56282	13.1325	10.1161	8.58487	8.85533	1.01474	1.16364	no
-0.130385	0.522641	3.13e-09	0.300164	MIEN1		Migration and invasion enhancer 1	Q9BRT3	14.1836	14.0267	13.8515	13.8132	13.5229	14.0198	13.8943	13.9164	0.120334	0.129526	no
0.0679864	0.522635	3.13e-09	0.300168	RTCB		RNA-splicing ligase RtcB homolog	Q9Y3I0	15.6701	15.7302	15.6614	15.6205	15.9166	15.7125	15.6407	15.6843	0.0315371	0.067585	no
-0.166396	0.522576	3.13e-09	0.300209	COG1		Conserved oligomeric Golgi complex subunit 1	Q8WTW3	11.1414	11.0847	10.9493	10.8646	10.7174	11.2863	10.663	10.7077	0.0868781	0.161296	no
-0.0737436	0.522439	3.13e-09	0.300304	STK11		Serine/threonine-protein kinase STK11	Q15831	11.8575	11.846	11.9475	11.8807	11.742	11.7809	11.9128	11.8011	0.031826	0.0476615	yes
-0.173474	0.522334	3.13e-09	0.300377	FOXP4		Forkhead box protein P4	Q8IVH2	9.98575	9.96082	10.0366	9.81007	9.99217	9.96685	9.45247	9.68783	0.0659331	0.129348	no
-0.102528	0.522009	3.13e-09	0.300601	PTCD2		Pentatricopeptide repeat-containing protein 2, mitochondrial	Q8WV60	11.3436	11.4041	11.1845	11.4117	11.3139	11.3551	11.1228	11.1419	0.071015	0.0800848	no
-0.480431	0.521616	3.13e-09	0.300874	KANSL3		KAT8 regulatory NSL complex subunit 3	Q9P2N6	7.97325	10.1548	9.11674	8.34924	8.35723	8.48183	8.25311	8.58014	0.708557	0.637434	no
-0.0740761	0.521351	3.13e-09	0.301057	SCAF4		SR-related and CTD-associated factor 4	O95104	14.2279	14.1884	14.1598	14.2383	14.0455	14.3302	14.0904	14.0519	0.0250417	0.0696278	no
-0.0647681	0.520814	3.13e-09	0.30143	C11orf54		Ester hydrolase C11orf54	Q9H0W9	15.0332	15.0507	14.9332	15.1488	15.029	14.8686	14.9605	15.0488	0.0611653	0.0593923	no
0.146101	0.520527	3.13e-09	0.301629	NUDT21		Cleavage and polyadenylation specificity factor subunit 5	O43809	15.9166	15.9521	16.0126	15.5656	16.3409	15.7757	16.0358	15.8789	0.130835	0.157249	no
-0.0850287	0.520466	3.13e-09	0.301672	MED29		Mediator of RNA polymerase II transcription subunit 29	Q9NX70	12.4422	12.2474	12.3571	12.5094	12.2179	12.3701	12.2337	12.3943	0.0776669	0.0732512	no
0.123684	0.520085	3.13e-09	0.301936	RAB6B		Ras-related protein Rab-6B	Q9NRW1	12.5261	12.6472	12.6628	12.245	12.8746	12.5053	12.5758	12.6202	0.127311	0.121031	no
-0.234299	0.520065	3.13e-09	0.30195	SETX		Probable helicase senataxin	Q7Z333	11.5818	11.0814	11.1787	12.1483	11.2756	11.428	11.2091	11.1402	0.358956	0.285351	no
0.507452	0.519935	3.13e-09	0.30204	SETD1B		Histone-lysine N-methyltransferase SETD1B	Q9UPS6	8.88832	8.0937	9.64774	9.00695	8.73135	10.2543	8.60479	10.0761	0.422629	0.536376	no
0.578586	0.519317	3.13e-09	0.302471	TUBGCP5		Gamma-tubulin complex component 5	Q96RT8	7.01685	6.37839	7.26172	7.29999	6.82016	8.37578	6.79652	8.27884	0.260827	0.54253	no
0.0507628	0.518892	3.13e-09	0.302767	NECAP2		Adaptin ear-binding coat-associated protein 2	Q9NVZ3	14.956	14.9977	15.0255	15.0158	15.0225	14.9614	15.1318	15.0824	0.0211771	0.0413881	no
-0.0459558	0.518872	3.13e-09	0.302781	EDC4		Enhancer of mRNA-decapping protein 4	Q6P2E9	16.7154	16.7323	16.7293	16.8478	16.7001	16.6679	16.7459	16.7269	0.0434924	0.0369234	no
0.0397199	0.517709	3.13e-09	0.303592	SUCLG2		Succinate--CoA ligase [GDP-forming] subunit beta, mitochondrial	Q96I99	14.6168	14.6064	14.6571	14.6672	14.6837	14.6797	14.6741	14.6688	0.0206483	0.0200222	no
-0.0495518	0.516729	3.13e-09	0.304278	RHOC		Rho-related GTP-binding protein RhoC	P08134	17.7644	17.7529	17.6072	17.6491	17.6741	17.6262	17.6545	17.6205	0.0534484	0.0418275	no
-0.557745	0.516552	3.13e-09	0.304402	NCBP3		Nuclear cap-binding protein subunit 3	Q53F19	8.55603	8.46713	7.21378	8.39531	7.62654	8.64254	6.5057	7.6265	0.345137	0.447086	no
-0.145104	0.516516	3.13e-09	0.304427	SH3BP5L		SH3 domain-binding protein 5-like	Q7L8J4	11.6414	11.9163	11.7056	11.9035	11.34	11.5997	11.6802	11.9665	0.0957941	0.139	no
0.854911	0.516363	3.13e-09	0.304535	DVL3		Segment polarity protein dishevelled homolog DVL-3	Q92997	10.7678	10.7368	10.3129	6.86101	10.5654	10.7846	10.6942	10.0539	0.628056	0.412443	no
0.0991567	0.516325	3.13e-09	0.304561	NCK1		Cytoplasmic protein NCK1	P16333	12.2285	12.2967	12.4025	12.2293	12.5056	12.4926	12.1456	12.4099	0.0578048	0.09182	no
-0.0639823	0.515932	3.13e-09	0.304838	NUDT19		Nucleoside diphosphate-linked moiety X motif 19	A8MXV4	13.6188	13.5978	13.6861	13.6169	13.6203	13.4876	13.68	13.4757	0.0270936	0.0534391	no
0.0914328	0.515867	3.13e-09	0.304883	RPS25		40S ribosomal protein S25	P62851	18.8257	18.9212	18.8855	18.7396	19.1927	18.8573	18.8528	18.8351	0.0544426	0.0990988	no
-0.0554158	0.515438	3.13e-09	0.305184	NELFB		Negative elongation factor B	Q8WX92	14.7374	14.6489	14.7166	14.8601	14.6603	14.7295	14.6755	14.676	0.0618839	0.0483892	no
-0.0502081	0.515287	3.13e-09	0.30529	TSG101		Tumor susceptibility gene 101 protein	Q99816	14.4521	14.3607	14.4557	14.4031	14.369	14.3263	14.4493	14.3261	0.0310596	0.0381606	no
0.149779	0.515203	3.13e-09	0.305349	NHLRC2		NHL repeat-containing protein 2	Q8NBF2	13.1556	13.7732	13.8459	13.7476	13.852	13.7853	13.706	13.7781	0.19773	0.135281	no
-0.064546	0.515048	3.13e-09	0.305459	SEH1L		Nucleoporin SEH1	Q96EE3	14.7576	14.7846	14.7895	14.8425	14.7689	14.7237	14.5756	14.848	0.0247844	0.0573688	no
0.0818239	0.514826	3.13e-09	0.305615	FTSJ3		pre-rRNA 2'-O-ribose RNA methyltransferase FTSJ3	Q8IY81	11.9521	11.8345	11.8931	11.7563	11.8799	12.0063	12.0287	11.8484	0.0576912	0.0634552	no
0.273921	0.514642	3.13e-09	0.305744	SHKBP1		SH3KBP1-binding protein 1	Q8TBC3	10.8118	10.9412	11.8054	10.6936	11.6507	10.9296	11.5066	11.2608	0.397929	0.294205	no
-0.134039	0.514488	3.13e-09	0.305852	PLA2G4A		Cytosolic phospholipase A2	P47712	10.3589	10.2254	10.402	10.1906	9.93383	10.2615	10.2671	10.1783	0.0707383	0.0941408	no
-0.0651126	0.514325	3.13e-09	0.305968	NELFCD		Negative elongation factor C/D	Q8IXH7	13.8299	13.81	13.8039	13.9081	13.6847	13.9157	13.7109	13.7802	0.0337739	0.0570008	no
0.113848	0.514037	3.13e-09	0.30617	PPP4R1		Serine/threonine-protein phosphatase 4 regulatory subunit 1	Q8TF05	14.0402	14.074	14.1854	13.7735	14.3502	13.9462	14.1377	14.0944	0.116426	0.116262	no
-0.0567078	0.513976	3.13e-09	0.306213	TNPO1		Transportin-1	Q92973	16.7387	16.7164	16.7322	16.8826	16.6814	16.6269	16.7667	16.768	0.0549632	0.0521971	no
-0.049159	0.513831	3.13e-09	0.306315	RPAP3		RNA polymerase II-associated protein 3	Q9H6T3	13.9997	13.9452	13.9775	14.0326	13.8826	14.0085	13.928	13.9394	0.0255268	0.0340879	no
0.0948444	0.513754	3.13e-09	0.30637	PLEKHF2		Pleckstrin homology domain-containing family F member 2	Q9H8W4	11.9747	12.0993	11.8924	11.9755	12.2059	11.9164	12.0003	12.1987	0.0597564	0.0854385	no
-0.097925	0.513077	3.13e-09	0.306848	ANAPC10		Anaphase-promoting complex subunit 10	Q9UM13	11.2697	11.3812	11.4022	11.4854	11.2373	11.1621	11.2988	11.4487	0.0611274	0.0769157	no
-0.413125	0.513055	3.13e-09	0.306863	HSPA1L		Heat shock 70 kDa protein 1-like	P34931	14.6381	14.5462	14.2707	15.6664	13.3198	14.833	14.5975	14.7185	0.484249	0.445457	no
-0.347025	0.513045	3.13e-09	0.30687	CDK5RAP3		CDK5 regulatory subunit-associated protein 3	Q96JB5	8.55782	8.82638	8.87959	8.90666	7.7516	8.84036	8.11857	9.07182	0.105464	0.270498	no
-0.17912	0.512989	3.13e-09	0.30691	FPGT		Fucose-1-phosphate guanylyltransferase	O14772	10.752	10.7572	10.8466	10.3999	10.3501	10.3823	10.3668	10.9401	0.128805	0.172555	no
0.107464	0.51292	3.13e-09	0.306959	NFYA		Nuclear transcription factor Y subunit alpha	P23511	11.1431	11.3861	11.3027	11.0787	11.2521	11.2374	11.3887	11.4623	0.098205	0.0894754	no
0.0692269	0.512389	3.13e-09	0.307334	C17orf75		Protein Njmu-R1	Q9HAS0	12.5805	12.564	12.5782	12.5659	12.6524	12.5857	12.7843	12.5432	0.00581087	0.0567192	no
-0.074397	0.512108	3.13e-09	0.307533	PDHA1		Pyruvate dehydrogenase E1 component subunit alpha, somatic form, mitochondrial	P08559	15.9124	15.812	15.8396	15.9084	15.8032	15.983	15.6471	15.7417	0.0346764	0.072737	no
-0.140553	0.511873	3.13e-09	0.3077	SRSF6		Serine/arginine-rich splicing factor 6	Q13247	15.3799	15.2701	15.1479	15.6845	14.9965	15.4874	15.1574	15.2789	0.165434	0.154432	no
0.103753	0.511684	3.13e-09	0.307834	EXOSC6		Exosome complex component MTR3	Q5RKV6	15.2066	15.1615	15.2618	14.9363	15.4363	15.0648	15.3323	15.1478	0.0952544	0.107323	no
0.197821	0.511544	3.13e-09	0.307933	PLCH1		1-phosphatidylinositol 4,5-bisphosphate phosphodiesterase eta-1	Q4KWH8	14.9795	14.7013	15.2051	14.379	15.2006	14.9018	15.2541	14.6997	0.240965	0.203485	no
0.238184	0.510952	3.13e-09	0.308353	ORC1		Origin recognition complex subunit 1	Q13415	10.7382	9.9357	10.9609	10.3737	10.6896	10.8587	10.9611	10.4519	0.294701	0.220698	no
0.0824824	0.509244	3.13e-09	0.309568	NDRG1		Protein NDRG1	Q92597	11.6655	11.8264	11.8426	11.8142	11.898	11.7562	11.9791	11.8453	0.0552802	0.0638817	no
0.0958694	0.509224	3.13e-09	0.309583	TNKS1BP1		182 kDa tankyrase-1-binding protein	Q9C0C2	13.8571	14.0226	14.0664	13.9143	14.2131	13.8104	14.1201	14.1003	0.0665694	0.0962053	no
0.201022	0.509215	3.13e-09	0.309589	MOCOS		Molybdenum cofactor sulfurase	Q96EN8	9.29075	9.30113	8.98876	9.07778	9.20298	9.12232	9.46649	9.67072	0.107087	0.160318	no
-0.0558178	0.508719	3.13e-09	0.309942	ELP3		Elongator complex protein 3	Q9H9T3	14.3335	14.3554	14.3191	14.4403	14.3305	14.197	14.3711	14.3264	0.0381699	0.0463795	no
0.0458928	0.50863	3.13e-09	0.310006	ATG3		Ubiquitin-like-conjugating enzyme ATG3	Q9NT62	15.2162	15.2419	15.2384	15.1364	15.2853	15.1905	15.2916	15.2489	0.0336143	0.034717	no
-0.0483569	0.508594	3.13e-09	0.310032	PPP4R3B		Serine/threonine-protein phosphatase 4 regulatory subunit 3B	Q5MIZ7	13.3875	13.3773	13.3586	13.4077	13.3047	13.3941	13.3075	13.3314	0.0141969	0.0275073	no
0.166027	0.507556	3.13e-09	0.310774	YTHDF1		YTH domain-containing family protein 1	Q9BYJ9	11.2875	11.3531	11.4096	11.8109	11.4873	11.9521	11.3752	11.7106	0.174504	0.176305	no
0.307808	0.506701	3.13e-09	0.311386	NGDN		Neuroguidin	Q8NEJ9	10.0121	9.76062	8.67261	9.6828	9.47909	10.0346	9.96383	9.88187	0.33936	0.249714	no
0.10482	0.506496	3.13e-09	0.311533	MTA1		Metastasis-associated protein MTA1	Q13330	12.8536	12.7956	12.9271	12.5132	13.0435	12.8066	12.813	12.8456	0.119516	0.100251	no
0.0820835	0.506494	3.13e-09	0.311535	SF3A2		Splicing factor 3A subunit 2	Q15428	14.7451	14.657	14.7354	14.4541	14.8696	14.7064	14.7136	14.6304	0.0901958	0.0803468	no
0.105229	0.506194	3.13e-09	0.311749	MED24		Mediator of RNA polymerase II transcription subunit 24	O75448	11.4492	11.4617	11.6213	11.2378	11.5457	11.6838	11.47	11.4914	0.107581	0.0903313	no
0.542456	0.506175	3.13e-09	0.311763	SHARPIN		Sharpin	Q9H0F6	7.7563	6.8291	6.99963	7.14476	7.96224	8.79298	6.73494	7.40944	0.30482	0.570432	no
-0.0593728	0.506158	3.13e-09	0.311775	ALDH1B1		Aldehyde dehydrogenase X, mitochondrial	P30837	13.871	13.8185	13.8382	13.8322	13.7189	13.9238	13.753	13.7267	0.0154895	0.0501365	no
0.350002	0.505901	3.13e-09	0.31196	CD63		CD63 antigen	P08962	11.1002	11.2813	11.0313	9.97185	11.8603	10.7432	11.3281	10.853	0.333863	0.356628	no
0.275829	0.505766	3.13e-09	0.312057	UAP1L1		UDP-N-acetylhexosamine pyrophosphorylase-like protein 1	Q3KQV9	13.2375	14.057	14.4891	13.4895	14.241	13.7042	14.315	14.1163	0.393114	0.279583	no
-0.202241	0.505641	3.13e-09	0.312147	COG2		Conserved oligomeric Golgi complex subunit 2	Q14746	11.2488	10.9724	10.9929	10.7297	10.8246	11.2873	10.515	10.508	0.147405	0.206251	no
-0.265985	0.505164	3.13e-09	0.31249	NDUFV1		NADH dehydrogenase [ubiquinone] flavoprotein 1, mitochondrial	P49821	15.9198	16.4773	15.7387	16.2613	15.9851	16.3673	15.8262	15.1545	0.229788	0.268412	no
-0.0871428	0.504307	3.13e-09	0.313107	ARGLU1		Arginine and glutamate-rich protein 1	Q9NWB6	11.6444	11.8652	11.9264	11.9161	11.7673	11.6945	11.7315	11.8102	0.0876256	0.0714727	no
0.157339	0.504216	3.13e-09	0.313172	CHMP1A		Charged multivesicular body protein 1a	Q9HD42	15.4655	15.4973	15.5663	15.193	15.924	15.1876	15.715	15.5248	0.108334	0.172841	no
0.0361697	0.504183	3.13e-09	0.313196	MCM5		DNA replication licensing factor MCM5	P33992	16.8667	16.8638	16.8879	16.8423	16.9367	16.9126	16.8732	16.8828	0.0129385	0.0206977	no
0.0755977	0.504107	3.13e-09	0.313252	ZMYND8		Protein kinase C-binding protein 1	Q9ULU4	12.5328	12.6007	12.4298	12.644	12.5031	12.6991	12.6249	12.6825	0.0638815	0.063849	no
-0.121083	0.503901	3.13e-09	0.3134	AGL		Glycogen debranching enzyme	P35573	14.8611	14.831	14.5895	15.1389	14.5668	14.8771	14.6698	14.8223	0.157159	0.132472	no
0.127134	0.5038	3.13e-09	0.313473	LACTB2		Endoribonuclease LACTB2	Q53H82	14.585	14.6639	14.6353	14.4145	14.9501	14.3505	14.8146	14.692	0.0750822	0.135722	no
-0.109397	0.503472	3.13e-09	0.31371	EARS2		Probable glutamate--tRNA ligase, mitochondrial	Q5JPH6	11.6574	11.6863	11.6784	11.5053	11.6607	11.58	11.2546	11.5946	0.0574355	0.0928186	no
-0.241268	0.503317	3.13e-09	0.313821	WBP4		WW domain-binding protein 4	O75554	10.8241	10.5341	10.5729	10.5062	10.5696	9.71168	10.8652	10.3257	0.105503	0.21676	no
-0.0640317	0.503296	3.13e-09	0.313837	FRG1		Protein FRG1	Q14331	13.4253	13.5224	13.4549	13.5808	13.3276	13.5328	13.4488	13.4179	0.0485346	0.0549183	no
-0.0622426	0.502795	3.13e-09	0.314199	TFIP11		Tuftelin-interacting protein 11	Q9UBB9	13.0114	12.9587	12.9572	12.9555	12.8825	13.0233	12.8074	12.9208	0.0190096	0.0477138	no
-0.0524679	0.502673	3.13e-09	0.314288	AP2B1		AP-2 complex subunit beta	P63010	15.6479	15.5872	15.581	15.7675	15.5728	15.5623	15.6056	15.6329	0.061145	0.0476632	no
0.0836851	0.50238	3.13e-09	0.314499	KEAP1		Kelch-like ECH-associated protein 1	Q14145	13.9867	13.9747	14.0247	13.761	14.1539	13.8686	14.0697	13.9897	0.0794452	0.0817037	no
0.123291	0.502281	3.13e-09	0.314571	NFATC2		Nuclear factor of activated T-cells, cytoplasmic 2	Q13469	10.6985	11.2244	10.9547	11.0422	11.0678	11.1396	11.0999	11.1056	0.148681	0.103188	no
0.145683	0.502245	3.13e-09	0.314597	MALT1		Mucosa-associated lymphoid tissue lymphoma translocation protein 1	Q9UDY8	11.9691	11.8282	11.3286	11.8553	11.7737	12.013	11.9483	11.8289	0.180175	0.132891	no
-0.20105	0.502167	3.13e-09	0.314654	NCAPH2		Condensin-2 complex subunit H2	Q6IBW4	12.2749	12.2284	12.2182	12.2625	12.1718	12.4594	11.4152	12.1334	0.0187245	0.180635	no
-0.0453367	0.501424	3.13e-09	0.315193	NAPA		Alpha-soluble NSF attachment protein	P54920	15.0282	15.0287	15.0539	15.1217	15.0409	14.9441	15.0115	15.0546	0.0309116	0.03428	no
0.066544	0.501231	3.13e-09	0.315333	ARAP1		Arf-GAP with Rho-GAP domain, ANK repeat and PH domain-containing protein 1	Q96P48	13.4299	13.5082	13.5027	13.4968	13.602	13.6858	13.4475	13.4685	0.0250722	0.0609558	no
0.0584237	0.500988	3.13e-09	0.315509	XRCC5		X-ray repair cross-complementing protein 5	P13010	17.067	17.1062	17.0898	16.981	17.2317	17.1674	17.0529	17.0256	0.0380393	0.0558538	no
0.0735296	0.500894	3.13e-09	0.315578	ENO2		Gamma-enolase	P09104	20.9388	20.982	20.9851	21.0908	21.0623	20.9237	21.2258	21.079	0.0454869	0.0704585	no
-0.211881	0.500809	3.13e-09	0.315639	TBC1D10A		TBC1 domain family member 10A	Q9BXI6	10.1149	9.8068	10.1241	10.4419	10.3212	9.89357	9.52664	9.89862	0.18	0.201809	no
0.35127	0.500595	3.13e-09	0.315795	ARFRP1		ADP-ribosylation factor-related protein 1	Q13795	7.4737	7.572	8.03909	7.5222	8.32763	8.34617	7.73342	7.60486	0.195704	0.262879	no
-0.163085	0.500293	3.13e-09	0.316014	BUD31		Protein BUD31 homolog	P41223	14.2665	14.3449	14.1445	14.8065	13.962	14.3207	14.1418	14.4854	0.214882	0.18838	no
-0.0436303	0.499892	3.13e-09	0.316306	PSMD10		26S proteasome non-ATPase regulatory subunit 10	O75832	14.8682	14.8456	14.8577	14.7504	14.7959	14.7568	14.7995	14.7952	0.0368861	0.0308225	no
-0.0956628	0.499675	3.13e-09	0.316464	MAPK14		Mitogen-activated protein kinase 14	Q16539	13.8683	13.9096	13.8837	13.9702	13.82	14.0526	13.8042	13.5724	0.0313925	0.0944338	yes
0.0902918	0.499534	3.13e-09	0.316568	KLHL7		Kelch-like protein 7	Q8IXQ5	10.8036	10.6969	10.8926	10.819	10.9137	10.8934	10.9087	10.8576	0.0554546	0.0495813	no
-0.0607065	0.499454	3.13e-09	0.316625	CYFIP1		Cytoplasmic FMR1-interacting protein 1	Q7L576	13.7543	13.6144	13.8165	13.8305	13.6905	13.6576	13.7378	13.6871	0.0667775	0.0525062	no
-0.0996696	0.49888	3.13e-09	0.317044	YTHDC2		3'-5' RNA helicase YTHDC2	Q9H6S0	11.7932	11.9145	11.8985	12.0765	11.6488	11.9967	11.8294	11.8092	0.0822389	0.0912004	no
0.221767	0.498377	3.13e-09	0.317412	RPF2		Ribosome production factor 2 homolog	Q9H7B2	11.0807	11.4676	11.4088	10.9213	12.0542	11.3081	11.2135	11.1896	0.178115	0.268689	no
0.100512	0.498172	3.13e-09	0.317562	MMTAG2		Multiple myeloma tumor-associated protein 2	Q9BU76	12.1229	12.0037	12.1444	11.765	12.1571	12.1925	12.0129	12.0755	0.115615	0.0894941	no
-0.0424812	0.497738	3.13e-09	0.317879	RPL7		60S ribosomal protein L7	P18124	17.3798	17.4217	17.3274	17.3306	17.3736	17.3449	17.2822	17.289	0.0312267	0.0327138	no
-0.036411	0.496965	3.13e-09	0.318445	MYH10		Myosin-10	P35580	17.0858	17.0403	17.0769	17.0841	17.0248	16.9971	17.0689	17.0508	0.014677	0.0217079	no
0.123565	0.49663	3.13e-09	0.318691	MAGEC2		Melanoma-associated antigen C2	Q9UBF1	13.3306	13.5912	13.573	13.5725	13.8471	13.32	13.8012	13.5931	0.0825659	0.130671	no
0.0476489	0.496497	3.13e-09	0.318789	DEK		Protein DEK	P35659	15.1978	15.2481	15.2637	15.3537	15.2718	15.3708	15.303	15.3083	0.0454707	0.0391453	no
-0.0704369	0.496372	3.13e-09	0.31888	USP22		Ubiquitin carboxyl-terminal hydrolase 22	Q9UPT9	12.6535	12.6532	12.5487	12.5306	12.4251	12.6512	12.5165	12.5113	0.0457302	0.0578923	no
0.0550506	0.496233	3.13e-09	0.318983	PDIA5		Protein disulfide-isomerase A5	Q14554	13.3989	13.3276	13.3791	13.4492	13.38	13.4404	13.5313	13.4233	0.0348468	0.0425298	no
0.222899	0.495788	3.13e-09	0.319309	MRPS2		28S ribosomal protein S2, mitochondrial	Q9Y399	11.741	11.6233	12.0283	11.1703	12.3249	11.942	11.6038	11.5837	0.236694	0.243234	no
0.221685	0.494697	3.13e-09	0.320113	COX19		Cytochrome c oxidase assembly protein COX19	Q49B96	11.5511	11.6469	11.7888	11.3006	12.3312	11.2376	11.884	11.7214	0.138651	0.25469	no
-0.131661	0.494423	3.13e-09	0.320315	PSMC3IP		Homologous-pairing protein 2 homolog	Q9P2W1	10.7923	10.8371	11.0099	11.0238	10.9024	10.908	10.4715	10.8545	0.0816466	0.111305	no
0.312783	0.494393	3.13e-09	0.320337	TUFT1		Tuftelin	Q9NNX1	8.14152	7.83722	8.45806	8.4469	8.97366	7.96563	8.50693	8.6886	0.194628	0.261765	no
-0.0415001	0.494141	3.13e-09	0.320523	DYNC1I2		Cytoplasmic dynein 1 intermediate chain 2	Q13409	15.9815	16.0149	15.9781	16.0733	15.9512	15.9309	15.9778	16.0218	0.0308918	0.0311428	no
0.108964	0.493693	3.13e-09	0.320854	TPD52L1		Tumor protein D53	Q16890	13.3522	13.5876	13.4126	13.3858	13.691	13.2315	13.6181	13.6334	0.0749352	0.112448	no
-0.0896946	0.493235	3.13e-09	0.321192	RAD50		DNA repair protein RAD50	Q92878	15.2657	15.2553	15.2945	15.3819	15.3091	15.287	14.9321	15.3104	0.0404375	0.0866369	no
-0.0776684	0.493176	3.13e-09	0.321236	WDR61		WD repeat-containing protein 61	Q9GZS3	13.5008	13.5343	13.6765	13.6668	13.4701	13.4551	13.4398	13.7027	0.0622965	0.0762689	no
0.440322	0.493041	3.13e-09	0.321336	EZH1		Histone-lysine N-methyltransferase EZH1	Q92800	10.5112	9.00688	10.7116	9.48459	9.84869	10.9422	10.7916	9.89311	0.515911	0.432397	no
-0.114472	0.493039	3.13e-09	0.321337	UEVLD		Ubiquitin-conjugating enzyme E2 variant 3	Q8IX04	11.467	11.6826	11.6328	11.504	11.542	11.5789	11.1684	11.5391	0.0711398	0.100747	no
0.0568151	0.492957	3.13e-09	0.321398	PLIN2		Perilipin-2	Q99541	12.8026	12.8202	12.7621	12.8185	12.9162	12.8309	12.7733	12.9102	0.0185805	0.039842	no
0.0733929	0.491942	3.13e-09	0.32215	BRCC3		Lys-63-specific deubiquitinase BRCC36	P46736	13.8887	13.9155	13.9738	13.8748	14.1026	13.7965	14.0768	13.9703	0.0306302	0.0719456	no
-0.475268	0.490835	3.13e-09	0.322972	TM9SF3		Transmembrane 9 superfamily member 3	Q9HD45	8.49987	8.26447	7.7759	8.63542	7.23573	9.10194	7.40168	7.53523	0.241601	0.473347	no
-0.201699	0.490732	3.13e-09	0.323049	TNIP2		TNFAIP3-interacting protein 2	Q8NFZ5	10.2073	10.1869	9.53748	10.1809	9.62364	9.87199	10.1062	9.70399	0.200774	0.186432	no
0.0489814	0.490059	3.13e-09	0.32355	C11orf98		Uncharacterized protein C11orf98	E9PRG8	14.9995	14.9436	15.057	15.0021	15.0877	14.9527	15.1011	15.0567	0.0320924	0.0411105	no
0.122899	0.489984	3.13e-09	0.323606	DESI1		Desumoylating isopeptidase 1	Q6ICB0	11.3164	11.3003	11.2724	11.1607	11.7155	11.3243	11.3078	11.1939	0.0477109	0.128694	no
0.0559298	0.489958	3.13e-09	0.323625	HNRNPC		Heterogeneous nuclear ribonucleoproteins C1/C2	P07910	15.3727	15.3479	15.2914	15.2783	15.4969	15.4128	15.3075	15.2968	0.0312451	0.0530957	no
0.0503917	0.489839	3.13e-09	0.323713	AKR1C3		Aldo-keto reductase family 1 member C3	P42330	15.1468	15.111	15.134	15.169	15.1711	15.3072	15.1082	15.1759	0.0168052	0.0450796	no
0.164998	0.489735	3.13e-09	0.323791	TIAL1		Nucleolysin TIAR	Q01085	14.1797	14.1946	14.3544	13.7562	14.6533	14.0485	14.3493	14.0938	0.166104	0.183476	no
0.200817	0.489295	3.13e-09	0.32412	STX17		Syntaxin-17	P56962	10.3628	10.2292	9.84311	10.3359	10.5507	10.6978	10.3985	9.92735	0.154575	0.194295	no
0.140362	0.489293	3.13e-09	0.324121	RALBP1		RalA-binding protein 1	Q15311	11.4871	11.6756	11.609	11.1897	11.8171	11.6455	11.7089	11.3512	0.141735	0.136572	no
-0.0558996	0.488942	3.13e-09	0.324383	ELP2		Elongator complex protein 2	Q6IA86	14.5104	14.5685	14.528	14.6966	14.5087	14.4494	14.5422	14.5795	0.0595647	0.0512243	no
0.0705177	0.488344	3.13e-09	0.32483	UBE2H		Ubiquitin-conjugating enzyme E2 H	P62256	13.1339	13.06	13.1255	13.2265	13.1681	13.0726	13.3258	13.2615	0.0478103	0.0652625	no
0.142829	0.488337	3.13e-09	0.324835	REEP5		Receptor expression-enhancing protein 5	Q00765	11.8341	12.0956	11.8187	11.6278	12.2844	11.9669	11.6978	11.9985	0.135483	0.152536	no
-0.122747	0.488194	3.13e-09	0.324942	FTSJ1		Putative tRNA (cytidine(32)/guanosine(34)-2'-O)-methyltransferase	Q9UET6	12.5543	12.2592	12.5488	12.5122	12.4342	12.5616	12.0406	12.3471	0.0930544	0.119954	no
0.0615012	0.487984	3.13e-09	0.3251	RPRD1B		Regulation of nuclear pre-mRNA domain-containing protein 1B	Q9NQG5	15.2472	15.2231	15.2716	15.1572	15.3936	15.1439	15.3504	15.2573	0.0337792	0.059945	no
-0.183668	0.487886	3.13e-09	0.325173	SENP6		Sentrin-specific protease 6	Q9GZR1	11.6556	11.5258	11.7539	12.2266	11.2422	11.8565	11.7581	11.5706	0.226933	0.204775	no
0.170551	0.487677	3.13e-09	0.325329	MYDGF		Myeloid-derived growth factor	Q969H8	14.0939	13.8654	14.287	13.715	14.5773	13.8631	14.1389	14.0642	0.17519	0.198226	no
-0.0966467	0.487646	3.13e-09	0.325352	MIF4GD		MIF4G domain-containing protein	A9UHW6	11.5608	11.5765	11.5757	11.5798	11.2868	11.6952	11.4791	11.4451	0.00585279	0.0820354	no
0.446834	0.487618	3.13e-09	0.325374	AKAP9		A-kinase anchor protein 9	Q99996	13.1934	11.4731	13.2637	13.8892	13.1993	13.5246	13.3264	13.5565	0.542641	0.347655	no
0.0894775	0.48757	3.13e-09	0.325409	ATM		Serine-protein kinase ATM	Q13315	12.1292	12.0867	11.8626	12.0035	12.221	11.9545	12.1666	12.0979	0.0797972	0.080318	yes
0.0953816	0.487413	3.13e-09	0.325527	DNASE2		Deoxyribonuclease-2-alpha	O00115	15.1138	15.2218	15.2706	15.1689	15.4293	14.9954	15.3941	15.3379	0.0467708	0.100384	no
-0.0551644	0.487242	3.13e-09	0.325655	PAK1IP1		p21-activated protein kinase-interacting protein 1	Q9NWT1	13.6358	13.647	13.7734	13.7502	13.6957	13.6811	13.5746	13.6343	0.0487564	0.0454356	no
-0.0898944	0.487063	3.13e-09	0.32579	GNB1		Guanine nucleotide-binding protein G(I)/G(S)/G(T) subunit beta-1	P62873	12.2696	12.2149	12.0463	12.0555	12.2244	12.0742	11.966	11.9621	0.0783402	0.0834421	no
0.0707324	0.486477	3.13e-09	0.326229	BCKDHA		2-oxoisovalerate dehydrogenase subunit alpha, mitochondrial	P12694	12.7555	12.6239	12.5767	12.5178	12.7129	12.772	12.62	12.6519	0.0712252	0.0609636	no
0.131725	0.486436	3.13e-09	0.32626	MRPL11		39S ribosomal protein L11, mitochondrial	Q9Y3B7	12.4247	12.2423	12.4032	12.0116	12.5553	12.6084	12.2752	12.1698	0.127286	0.137124	no
0.232635	0.486125	3.13e-09	0.326494	ARHGEF18		Rho guanine nucleotide exchange factor 18	Q6ZSZ5	10.4155	10.1348	10.6144	9.86819	10.7553	10.6785	10.6036	9.92596	0.221638	0.229263	no
-0.130466	0.485968	3.13e-09	0.326612	DDHD1		Phospholipase DDHD1	Q8NEL9	10.2687	10.236	10.0359	10.3576	9.9769	9.99133	10.1725	10.2358	0.0916147	0.0972161	no
-0.0592505	0.485922	3.13e-09	0.326647	USP9X		Probable ubiquitin carboxyl-terminal hydrolase FAF-X	Q93008	14.097	14.193	14.0837	14.0347	14.0581	14.0898	13.9189	14.1046	0.0464575	0.0527817	no
0.167333	0.48563	3.13e-09	0.326866	POLDIP3		Polymerase delta-interacting protein 3	Q9BY77	11.1438	11.8924	11.8824	11.8635	11.8172	11.8644	11.9016	11.8683	0.222075	0.148273	no
0.160572	0.485259	3.13e-09	0.327146	COA7		Cytochrome c oxidase assembly factor 7	Q96BR5	13.5637	14.1961	14.2121	14.4012	14.2381	14.1751	14.3022	14.3	0.227099	0.152517	no
0.0841517	0.485211	3.13e-09	0.327182	FADD		FAS-associated death domain protein	Q13158	12.7545	12.5483	12.798	12.5678	12.6513	12.723	12.8955	12.7354	0.08835	0.0806637	no
-0.0810722	0.485138	3.13e-09	0.327236	CRTAP		Cartilage-associated protein	O75718	12.6662	12.5466	12.5516	12.6699	12.5506	12.7108	12.4229	12.4258	0.047583	0.0749637	no
0.0658575	0.485133	3.13e-09	0.327241	PGM3		Phosphoacetylglucosamine mutase	O95394	15.109	15.1529	15.0996	15.0117	15.3383	15.0858	15.1015	15.1111	0.0405605	0.0683745	no
0.0808857	0.485131	3.13e-09	0.327242	MRPS9		28S ribosomal protein S9, mitochondrial	P82933	12.3999	12.4177	12.3538	12.1902	12.4308	12.5643	12.3242	12.3659	0.0697624	0.0732152	no
-0.109612	0.48491	3.13e-09	0.327408	UBTF		Nucleolar transcription factor 1	P17480	11.7197	11.6538	11.6116	11.7343	11.3924	11.8562	11.4592	11.573	0.0396352	0.104055	no
-0.0530338	0.484748	3.13e-09	0.32753	TRAPPC3		Trafficking protein particle complex subunit 3	O43617	15.4119	15.4086	15.3269	15.3419	15.2558	15.2372	15.4179	15.3662	0.030628	0.0478892	no
-0.127191	0.484682	3.13e-09	0.327581	GAB2		GRB2-associated-binding protein 2	Q9UQC2	11.4825	11.3522	11.6487	11.4555	11.5485	11.0751	11.5291	11.2774	0.0864913	0.120202	no
-0.124826	0.484601	3.13e-09	0.327641	GLMN		Glomulin	Q92990	15.2406	15.3703	15.2536	15.4267	14.8192	15.1917	15.42	15.3611	0.063005	0.125185	no
-0.261501	0.484542	3.13e-09	0.327686	GLRX2		Glutaredoxin-2, mitochondrial	Q9NS18	11.4106	11.0312	11.6513	11.7179	10.4254	11.3994	11.4634	11.4768	0.201849	0.241372	no
0.126477	0.484207	3.13e-09	0.327939	PGGHG		Protein-glucosylgalactosylhydroxylysine glucosidase	Q32M88	11.2065	10.9324	11.3101	11.3687	11.3983	11.4084	11.0941	11.4228	0.12784	0.116223	no
0.0651328	0.483947	3.13e-09	0.328135	NISCH		Nischarin	Q9Y2I1	13.4423	13.4019	13.4419	13.3483	13.6322	13.4159	13.4626	13.3843	0.0305569	0.0616051	no
-0.189582	0.483819	3.13e-09	0.328232	HMGN4;HMGN2		High mobility group nucleosome-binding domain-containing protein 4;Non-histone chromosomal protein HMG-17	O00479;P05204	13.2411	12.7273	13.1042	13.1223	12.444	12.6665	13.2865	13.0396	0.145042	0.198555	no
0.294227	0.483229	3.13e-09	0.328678	SLC2A1		Solute carrier family 2, facilitated glucose transporter member 1	P11166	9.7801	9.74991	9.79314	9.01983	10.6446	9.671	9.54457	9.65973	0.227176	0.349383	no
-0.0505864	0.483131	3.13e-09	0.328752	PM20D2		Peptidase M20 domain-containing protein 2	Q8IYS1	13.0656	13.1202	13.0861	13.0782	13.0084	12.9808	13.0974	13.0612	0.0162644	0.0317236	no
-0.270318	0.483121	3.13e-09	0.32876	NABP2		SOSS complex subunit B1	Q9BQ15	10.9581	11.0056	10.2732	10.8661	10.4598	10.0809	10.2537	11.2272	0.209741	0.290164	no
-0.116091	0.482868	3.13e-09	0.328951	ZNF346		Zinc finger protein 346	Q9UL40	11.7245	11.3804	11.6351	11.5333	11.5252	11.6608	11.2707	11.3523	0.100831	0.111246	no
0.162262	0.48259	3.13e-09	0.329162	ACSL4		Long-chain-fatty-acid--CoA ligase 4	O60488	10.5541	10.4877	10.6538	10.2283	10.8243	10.9128	10.3566	10.4793	0.12124	0.160656	no
0.160055	0.482109	3.13e-09	0.329527	H4C1		Histone H4	P62805	17.924	17.9227	17.9113	17.5185	18.4516	17.8108	17.8292	17.825	0.129192	0.196545	no
-1.37287	0.481726	3.13e-09	0.329818	AKAP3		A-kinase anchor protein 3	O75969	7.94658	7.57028	8.50288	7.6259	7.91049	7.71067	1.89216	8.64083	0.319869	0.519173	no
-0.143941	0.481425	3.13e-09	0.330046	CCNA1		Cyclin-A1	P78396	11.6544	11.2944	11.2526	11.3906	11.1024	11.606	11.0878	11.2201	0.130472	0.151711	no
-0.198352	0.481326	3.13e-09	0.330122	PKIG		cAMP-dependent protein kinase inhibitor gamma	Q9Y2B9	11.0993	11.8793	11.6329	11.4624	11.3261	10.9122	11.6362	11.406	0.220253	0.210229	no
0.0605511	0.481227	3.13e-09	0.330197	OLA1		Obg-like ATPase 1	Q9NTK5	17.1668	17.1283	17.1308	17.0217	17.2836	17.2421	17.0755	17.0887	0.0427059	0.0607944	no
-0.087208	0.481115	3.13e-09	0.330282	RPP40		Ribonuclease P protein subunit p40	O75818	12.4943	12.6934	12.5419	12.5343	12.508	12.5225	12.2699	12.6146	0.0621243	0.0813704	no
-0.171578	0.48084	3.13e-09	0.330491	ANKRD52		Serine/threonine-protein phosphatase 6 regulatory ankyrin repeat subunit C	Q8NB46	10.0279	10.1947	10.2396	10.1672	9.96421	10.3203	9.58005	10.0785	0.0619258	0.145756	no
0.117219	0.480683	3.13e-09	0.330611	KAZN		Kazrin	Q674X7	10.6648	10.5502	10.5513	10.8214	10.6999	10.6361	10.9738	10.7468	0.090927	0.101767	no
0.0790374	0.480637	3.13e-09	0.330646	ORC2		Origin recognition complex subunit 2	Q13416	12.28	12.4559	12.4629	12.6124	12.4697	12.5758	12.5034	12.5783	0.0935542	0.0704249	no
0.0866056	0.480579	3.13e-09	0.33069	BPHL		Valacyclovir hydrolase	Q86WA6	11.9702	11.9121	12.0201	11.7184	12.0678	12.0469	11.9624	11.8901	0.0886763	0.0746526	no
-0.201997	0.480531	3.13e-09	0.330726	KANK1		KN motif and ankyrin repeat domain-containing protein 1	Q14678	10.3454	10.562	10.4395	10.2554	10.5493	9.63001	10.3925	10.2226	0.091547	0.178451	no
-0.698802	0.480419	3.13e-09	0.330812	ZMYM1		Zinc finger MYM-type protein 1	Q5SVZ6	9.96114	9.59168	12.5995	9.12021	10.0994	9.9069	8.88154	9.58945	1.27608	1.29984	no
0.0873425	0.480346	3.13e-09	0.330868	RBBP4		Histone-binding protein RBBP4	Q09028	18.1216	18.1382	18.223	18.0386	18.3993	17.9875	18.306	18.1781	0.0523854	0.0948024	no
-0.0783948	0.480137	3.13e-09	0.331027	CCNK		Cyclin-K	O75909	13.0094	12.9609	12.9931	12.8807	13.006	12.6804	12.9019	12.9422	0.0391148	0.0712649	no
-0.0530366	0.479894	3.13e-09	0.331212	CKAP5		Cytoskeleton-associated protein 5	Q14008	14.3746	14.4353	14.2991	14.3924	14.2822	14.4314	14.2889	14.2866	0.0390955	0.0465001	no
-0.0896966	0.479755	3.13e-09	0.331318	MRPL13		39S ribosomal protein L13, mitochondrial	Q9BYD1	11.4784	11.5188	11.452	11.3884	11.5078	11.451	11.2194	11.3006	0.037721	0.0710713	no
-0.161349	0.479696	3.13e-09	0.331363	RBSN		Rabenosyn-5	Q9H1K0	10.6656	10.1966	10.702	10.5914	10.6648	10.361	10.3434	10.1411	0.149585	0.152617	no
-0.0469902	0.479654	3.13e-09	0.331395	GSTM2		Glutathione S-transferase Mu 2	P28161	13.8811	13.8713	13.8296	13.8083	13.749	13.8647	13.7666	13.822	0.0237938	0.0333071	no
-0.0706655	0.479625	3.13e-09	0.331417	STXBP5		Syntaxin-binding protein 5	Q5T5C0	11.9026	12.0039	11.9486	12.014	11.9615	11.7779	11.9506	11.8963	0.0357233	0.0506718	no
-0.0529346	0.479318	3.13e-09	0.331652	PNMT		Phenylethanolamine N-methyltransferase	P11086	13.182	13.2766	13.1084	13.1874	13.1177	13.131	13.1694	13.1246	0.0479098	0.0391015	no
-0.0378837	0.479292	3.13e-09	0.331671	SEC31A		Protein transport protein Sec31A	O94979	16.6635	16.6	16.6178	16.7099	16.6141	16.5991	16.6124	16.6141	0.0343293	0.0270669	no
0.0548671	0.479114	3.13e-09	0.331807	PUS7		Pseudouridylate synthase 7 homolog	Q96PZ0	15.6224	15.614	15.6901	15.677	15.7363	15.5728	15.8086	15.7052	0.0265274	0.0525027	no
0.156253	0.478803	3.13e-09	0.332045	RC3H1		Roquin-1	Q5TC82	11.1736	11.2738	11.3084	10.7899	11.57	11.3445	11.0047	11.2515	0.153323	0.157244	no
-0.107757	0.478313	3.13e-09	0.33242	CCDC59		Thyroid transcription factor 1-associated protein 26	Q9P031	12.0619	11.9915	12.091	11.9578	11.9568	12.1229	11.9692	11.6222	0.0425999	0.0997326	no
0.342656	0.478208	3.13e-09	0.3325	DOCK7		Dedicator of cytokinesis protein 7	Q96N67	7.71622	8.02896	8.37037	7.63463	8.91189	8.32539	7.79965	8.08386	0.240618	0.321474	no
-0.0433632	0.477916	3.13e-09	0.332724	CSE1L		Exportin-2	P55060	17.4968	17.4043	17.4783	17.4041	17.4774	17.3909	17.3816	17.3601	0.0337704	0.0361626	no
0.0891802	0.47782	3.13e-09	0.332798	KSR1		Kinase suppressor of Ras 1	Q8IVT5	12.3867	12.312	12.2625	12.2919	12.3392	12.6422	12.2577	12.3707	0.0371411	0.0919653	yes
0.212106	0.477337	3.13e-09	0.333168	STX5		Syntaxin-5	Q13190	9.96832	9.2098	9.27477	9.72324	9.89161	9.91144	9.73045	9.49105	0.254453	0.192873	no
-0.11014	0.477306	3.13e-09	0.333192	UBE3C		Ubiquitin-protein ligase E3C	Q15386	12.2607	12.2609	12.2417	12.3958	11.9352	12.4604	12.1018	12.2212	0.0505379	0.110279	no
-0.0499866	0.476108	3.13e-09	0.334112	ARHGAP18		Rho GTPase-activating protein 18	Q8N392	13.0203	13.0224	12.9992	13.0583	12.9825	13.0375	12.9605	12.9198	0.0170387	0.0307646	no
-0.114905	0.476053	3.13e-09	0.334154	TEX10		Testis-expressed protein 10	Q9NXF1	12.8297	12.7809	12.6675	12.8719	12.6723	12.9434	12.3674	12.7073	0.0601709	0.115843	no
-0.263494	0.475907	3.13e-09	0.334266	PLVAP		Plasmalemma vesicle-associated protein	Q9BX97	9.21346	9.51385	9.60902	9.89193	9.73863	9.65	8.85275	8.9329	0.192716	0.248365	no
0.33668	0.475078	3.13e-09	0.334905	THEMIS2		Protein THEMIS2	Q5TEJ8	12.6897	12.9554	12.6516	14.1712	13.1573	13.8742	13.1308	13.6523	0.584961	0.405723	no
0.051809	0.474928	3.13e-09	0.335021	SLAIN2		SLAIN motif-containing protein 2	Q9P270	14.6432	14.6436	14.7135	14.6755	14.7065	14.6135	14.8226	14.7404	0.0232274	0.0469534	no
0.179498	0.474871	3.13e-09	0.335065	SUPT7L		STAGA complex 65 subunit gamma	O94864	10.1888	10.743	10.3793	11.0364	10.7963	10.6858	10.8222	10.7611	0.263926	0.174798	no
0.12757	0.474208	3.13e-09	0.335577	CARM1		Histone-arginine methyltransferase CARM1	Q86X55	15.0058	15.2903	15.126	15.2439	15.576	14.9367	15.2751	15.3886	0.0871399	0.144371	no
-0.107147	0.474147	3.13e-09	0.335624	KDM8		Bifunctional peptidase and arginyl-hydroxylase JMJD5	Q8N371	10.5216	10.4562	10.6775	10.7	10.4697	10.6036	10.4071	10.4462	0.0818312	0.0785098	no
-0.126661	0.473911	3.13e-09	0.335807	KIFAP3		Kinesin-associated protein 3	Q92845	11.3852	11.1961	11.4485	11.4888	11.5855	11.1801	11.1213	11.1249	0.0869447	0.127457	no
0.0447316	0.473732	3.13e-09	0.335945	AKT1		RAC-alpha serine/threonine-protein kinase	P31749	13.6886	13.7227	13.6869	13.7981	13.7687	13.7811	13.7552	13.7704	0.0365307	0.0290679	yes
-0.0459259	0.473656	3.13e-09	0.336004	TGM2		Protein-glutamine gamma-glutamyltransferase 2	P21980	15.2977	15.2879	15.2588	15.2277	15.1594	15.3079	15.1705	15.2506	0.0217922	0.0384898	no
0.0603102	0.473404	3.13e-09	0.336199	CMBL		Carboxymethylenebutenolidase homolog	Q96DG6	17.7124	17.7869	17.7591	17.8871	17.8336	17.7167	17.9525	17.884	0.0518371	0.0607915	no
0.136693	0.473301	3.13e-09	0.336279	HBG1		Hemoglobin subunit gamma-1	P69891	21.2944	21.2756	21.4525	20.9503	21.6654	21.1432	21.4689	21.242	0.139985	0.151733	no
-0.148209	0.473018	3.13e-09	0.336498	NOP10		H/ACA ribonucleoprotein complex subunit 3	Q9NPE3	11.1545	10.8969	11.4082	11.2347	10.7885	11.3186	10.9154	11.0791	0.144255	0.151305	no
-0.0757113	0.472388	3.13e-09	0.336986	C2CD5		C2 domain-containing protein 5	Q86YS7	11.7901	11.6472	11.7563	11.7112	11.6575	11.7581	11.6503	11.5361	0.0425556	0.0563766	no
-0.0655773	0.472076	3.13e-09	0.337229	KNSTRN		Small kinetochore-associated protein	Q9Y448	13.3754	13.4261	13.2194	13.4158	13.2114	13.3579	13.2446	13.3604	0.0644568	0.0602116	no
0.0690861	0.47176	3.13e-09	0.337474	GOT2		Aspartate aminotransferase, mitochondrial	P00505	18.3461	18.4107	18.4639	18.4357	18.5442	18.281	18.5943	18.5131	0.0345448	0.0711949	no
0.106183	0.471081	3.13e-09	0.338001	GCSH		Glycine cleavage system H protein, mitochondrial	P23434	16.3592	16.4745	16.4859	16.3749	16.683	16.1764	16.6466	16.6132	0.0455596	0.115742	no
-0.242013	0.470477	3.13e-09	0.338472	NACA4P		Putative nascent polypeptide-associated complex subunit alpha-like protein	Q9BZK3	11.5661	11.4747	11.5824	12.2223	10.7924	11.7322	11.6952	11.6577	0.263386	0.258977	no
0.202156	0.470372	3.13e-09	0.338554	ZFAND3		AN1-type zinc finger protein 3	Q9H8U3	9.70089	9.58046	9.43239	9.06641	9.83645	9.26268	9.77289	9.71674	0.180188	0.176125	no
-0.214641	0.469951	3.13e-09	0.338882	GRK6		G protein-coupled receptor kinase 6	P43250	10.134	10.3019	9.94412	10.0586	10.1583	10.3278	9.39299	9.70096	0.105234	0.200764	yes
0.0804088	0.469905	3.13e-09	0.338918	IPO5		Importin-5	O00410	17.0998	17.1656	17.2504	17.1633	17.3567	16.9978	17.3358	17.3104	0.0430796	0.0856779	no
0.133806	0.469817	3.13e-09	0.338987	CHUK		Inhibitor of nuclear factor kappa-B kinase subunit alpha	O15111	12.6429	12.1561	12.1367	12.1844	12.2981	12.6748	12.301	12.3815	0.181558	0.151613	yes
-0.0827434	0.469352	3.13e-09	0.33935	RAB1A		Ras-related protein Rab-1A	P62820	12.6581	12.6315	12.5595	12.8158	12.5261	12.4409	12.6457	12.7211	0.0764232	0.0809756	no
-0.50333	0.469018	3.13e-09	0.339611	RUBCN		Run domain Beclin-1-interacting and cysteine-rich domain-containing protein	Q92622	14.7457	14.7067	15.4282	16.3623	14.7523	13.8341	14.5453	16.0979	0.590697	0.620005	no
-0.0375084	0.468801	3.13e-09	0.339781	DLAT		Dihydrolipoyllysine-residue acetyltransferase component of pyruvate dehydrogenase complex, mitochondrial	P10515	17.3912	17.4006	17.3888	17.4778	17.3843	17.337	17.4007	17.3864	0.0298137	0.0271718	no
0.141481	0.467924	3.13e-09	0.340467	ZNF512		Zinc finger protein 512	Q96ME7	10.9662	10.8616	10.8211	10.5852	11.0651	11.2289	10.7958	10.7101	0.107988	0.144357	no
-0.0939364	0.467581	3.13e-09	0.340737	FCHO2		F-BAR domain only protein 2	Q0JRZ9	11.4405	11.6444	11.7236	11.794	11.6037	11.6207	11.5619	11.4405	0.102723	0.0858748	no
0.118942	0.467457	3.13e-09	0.340834	DMAP1		DNA methyltransferase 1-associated protein 1	Q9NPF5	11.7864	11.773	11.4651	11.7586	11.6441	12.0853	11.6867	11.8428	0.101188	0.125156	no
-0.135689	0.467283	3.13e-09	0.340971	MOB3A		MOB kinase activator 3A	Q96BX8	10.8999	11.2873	11.5456	11.4335	11.099	11.1591	11.1586	11.2069	0.183227	0.140074	no
0.0581529	0.467173	3.13e-09	0.341057	DCAF16		DDB1- and CUL4-associated factor 16	Q9NXF7	13.1558	13.1099	13.148	13.0343	13.2861	13.1402	13.1455	13.1088	0.0379902	0.0497297	no
-0.0791244	0.466498	3.13e-09	0.341588	SZRD1		SUZ domain-containing protein 1	Q7Z422	13.1292	13.1159	13.1215	13.2609	12.9786	12.9343	13.1484	13.2497	0.0493493	0.0784154	no
-1.11352	0.466362	3.13e-09	0.341695	HECTD1		E3 ubiquitin-protein ligase HECTD1	Q9ULT8	8.07223	7.73776	7.82346	6.03806	8.15298	2.99593	6.34313	7.72538	0.4573	0.607966	no
0.080622	0.466304	3.13e-09	0.34174	SPTAN1		Spectrin alpha chain, non-erythrocytic 1	Q13813	13.5788	13.6173	13.6825	13.7141	13.8323	13.4914	13.8302	13.7613	0.0424644	0.0830343	no
0.237257	0.466093	3.13e-09	0.341906	AKR1B15;AKR1B10		Aldo-keto reductase family 1 member B15;Aldo-keto reductase family 1 member B10	C9JRZ8;O60218	13.5041	13.2765	13.6552	12.7276	13.6772	13.9543	13.4823	12.9986	0.256852	0.258159	no
0.0608675	0.465825	3.13e-09	0.342117	POFUT1		GDP-fucose protein O-fucosyltransferase 1	Q9H488	14.9901	14.9141	15.0618	15.072	15.0966	14.9287	15.169	15.0871	0.0502445	0.060631	no
0.536441	0.465667	3.13e-09	0.342242	KIDINS220		Kinase D-interacting substrate of 220 kDa	Q9ULH0	9.37367	11.124	12.1382	11.7217	12.2086	11.7335	11.0982	11.4631	0.609466	0.44339	no
-0.10013	0.465118	3.13e-09	0.342675	MRPS33		28S ribosomal protein S33, mitochondrial	Q9Y291	11.8517	12.0512	11.5934	11.7182	11.6961	11.6702	11.7504	11.6973	0.137715	0.103122	no
-0.109092	0.464963	3.13e-09	0.342797	NEU1		Sialidase-1	Q99519	11.4171	11.4877	11.4855	11.5455	11.5249	11.5843	11.1875	11.2028	0.0362941	0.101412	no
-0.0626833	0.464834	3.13e-09	0.342899	VPS36		Vacuolar protein-sorting-associated protein 36	Q86VN1	13.1971	13.3001	13.1816	13.3584	13.2958	13.1572	13.1178	13.2157	0.0588074	0.0573682	no
1.00714	0.464638	3.13e-09	0.343053	RPL39;RPL39P5		60S ribosomal protein L39;Putative 60S ribosomal protein L39-like 5	P62891;Q59GN2	11.3224	10.6419	11.9666	7.29684	12.284	11.7125	11.8979	9.36192	0.778148	0.64689	no
0.424799	0.464375	3.13e-09	0.343261	DNAJB3		DnaJ homolog subfamily B member 3	Q8WWF6	8.40053	8.57106	7.80189	6.7835	8.13584	8.30637	8.06658	8.74738	0.462362	0.335834	no
-0.0851486	0.46389	3.13e-09	0.343645	TJP2		Tight junction protein ZO-2	Q9UDY2	11.9214	11.9299	11.7443	12.0654	11.7582	11.9387	11.7708	11.8526	0.0902575	0.0784199	no
0.110059	0.463837	3.13e-09	0.343687	BAP1		Ubiquitin carboxyl-terminal hydrolase BAP1	Q92560	11.2796	11.2884	11.0528	11.1809	11.3898	11.5269	11.1972	11.128	0.0745872	0.107342	no
-0.172124	0.463314	3.13e-09	0.344101	RPN2		Dolichyl-diphosphooligosaccharide--protein glycosyltransferase subunit 2	P04844	10.8976	10.295	10.2031	10.2574	10.2403	10.4431	10.1233	10.1579	0.248214	0.19821	no
-0.0667551	0.46326	3.13e-09	0.344144	FKBPL		FK506-binding protein-like	Q9UIM3	12.5883	12.5549	12.425	12.6853	12.4798	12.462	12.5487	12.496	0.073936	0.0582737	no
-0.0433685	0.463151	3.13e-09	0.34423	PRPF4		U4/U6 small nuclear ribonucleoprotein Prp4	O43172	15.5188	15.4977	15.5657	15.5468	15.5087	15.5579	15.4008	15.4881	0.0207974	0.0358143	no
0.0903707	0.462525	3.13e-09	0.344726	CFDP1		Craniofacial development protein 1	Q9UEE9	14.2014	14.2777	14.2925	14.2689	14.4966	14.0571	14.4598	14.3886	0.027652	0.0975195	no
-0.037335	0.462098	3.13e-09	0.345066	PPM1G		Protein phosphatase 1G	O15355	16.3788	16.3235	16.3343	16.3962	16.2979	16.3771	16.2962	16.3122	0.0241816	0.0273408	no
-0.0798619	0.462035	3.13e-09	0.345116	ARPC1A		Actin-related protein 2/3 complex subunit 1A	Q92747	11.861	11.7925	11.9195	11.8573	11.9129	11.7239	11.6284	11.8456	0.035893	0.0668699	no
0.254934	0.461836	3.13e-09	0.345274	FOXK2		Forkhead box protein K2	Q01167	11.8801	11.583	12.1641	11.1093	12.4915	11.853	11.923	11.4887	0.297184	0.292961	no
-0.068699	0.461529	3.13e-09	0.345518	HP1BP3		Heterochromatin protein 1-binding protein 3	Q5SSJ5	14.135	13.9275	14.1108	14.1742	13.9549	14.1561	13.9743	13.9875	0.0734177	0.0698541	no
0.102955	0.461093	3.13e-09	0.345865	MED28		Mediator of RNA polymerase II transcription subunit 28	Q9H204	11.5172	11.4351	11.6248	11.1919	11.4621	11.5184	11.655	11.5453	0.123493	0.0940879	no
-0.219561	0.460909	3.13e-09	0.346012	NAA35		N-alpha-acetyltransferase 35, NatC auxiliary subunit	Q5VZE5	11.3026	11.2092	11.1808	11.2052	11.332	11.1293	10.2513	11.307	0.0377227	0.19404	no
-0.165893	0.460554	3.13e-09	0.346295	GCAT		2-amino-3-ketobutyrate coenzyme A ligase, mitochondrial	O75600	10.7159	10.7031	10.6243	10.5862	10.4252	10.8812	10.0549	10.6046	0.04308	0.157174	no
-0.108827	0.460203	3.13e-09	0.346575	NOM1		Nucleolar MIF4G domain-containing protein 1	Q5C9Z4	11.1943	11.2457	11.3757	11.3656	11.1426	11.4636	11.1055	11.0343	0.0617616	0.10413	no
0.122838	0.460113	3.13e-09	0.346647	MRPL45		39S ribosomal protein L45, mitochondrial	Q9BRJ2	13.6446	13.1833	13.6506	13.2891	13.5441	13.7265	13.6298	13.3586	0.165173	0.133352	no
-0.0608594	0.460063	3.13e-09	0.346687	CTU1		Cytoplasmic tRNA 2-thiolation protein 1	Q7Z7A3	13.0773	12.9174	13.0477	13.0522	12.8615	13.0496	12.9651	12.975	0.0487737	0.0522451	no
-0.181867	0.460023	3.13e-09	0.346718	RAP1GAP		Rap1 GTPase-activating protein 1	P47736	11.5157	11.2679	11.2084	10.6507	10.8297	10.9928	10.8451	11.2476	0.233713	0.199473	no
-0.223973	0.459733	3.13e-09	0.34695	TMEM179B		Transmembrane protein 179B	Q7Z7N9	10.5818	11.3505	10.9984	10.8003	10.3054	10.6828	11.2661	10.5808	0.231888	0.255763	no
-0.0531251	0.459592	3.13e-09	0.347063	RPL15		60S ribosomal protein L15	P61313	17.0199	16.9349	16.99	16.8128	16.8728	16.9626	16.8833	16.8263	0.0621653	0.0526376	no
-0.0812897	0.459561	3.13e-09	0.347088	COG6		Conserved oligomeric Golgi complex subunit 6	Q9Y2V7	12.267	12.1516	12.175	12.3632	12.1809	12.3201	12.0799	12.0508	0.0676903	0.0770677	no
0.170701	0.459414	3.13e-09	0.347205	GOLPH3L		Golgi phosphoprotein 3-like	Q9H4A5	11.2106	10.8751	11.2867	10.5147	11.0291	11.3157	11.2162	11.0089	0.231518	0.169378	no
0.202445	0.459365	3.13e-09	0.347244	KIF23		Kinesin-like protein KIF23	Q02241	11.315	11.2253	10.994	10.624	10.731	11.439	11.52	11.278	0.201295	0.212695	no
0.0949483	0.459308	3.13e-09	0.34729	NAA30		N-alpha-acetyltransferase 30	Q147X3	11.7204	11.691	11.7889	11.6135	11.6813	12.0225	11.65	11.8398	0.0502589	0.0957491	no
0.0791211	0.459261	3.13e-09	0.347328	RAD18		E3 ubiquitin-protein ligase RAD18	Q9NS91	12.2359	12.2738	12.373	12.3827	12.4516	12.5448	12.3529	12.2326	0.0502977	0.0762162	no
0.0924451	0.45923	3.13e-09	0.347352	MARK2		Serine/threonine-protein kinase MARK2	Q7KZI7	11.6709	11.7859	11.6073	11.8275	11.8269	12.0152	11.6769	11.7423	0.0701333	0.0905273	yes
0.0706176	0.459198	3.13e-09	0.347378	RPA3		Replication protein A 14 kDa subunit	P35244	16.4565	16.561	16.5397	16.579	16.7432	16.3964	16.6594	16.6197	0.0369788	0.0760205	no
-0.0414986	0.459163	3.13e-09	0.347406	GRHPR		Glyoxylate reductase/hydroxypyruvate reductase	Q9UBQ7	16.035	15.921	16.0121	16.0169	15.9187	16.0181	15.9264	15.9557	0.034884	0.0345083	no
-0.087738	0.45863	3.13e-09	0.347832	EZH2		Histone-lysine N-methyltransferase EZH2	Q15910	11.8152	11.8223	11.6871	11.9688	11.7392	11.8815	11.5964	11.7253	0.0801888	0.0814197	no
-0.0525673	0.458249	3.13e-09	0.348138	NUP93		Nuclear pore complex protein Nup93	Q8N1F7	15.5005	15.4635	15.4439	15.5105	15.3863	15.5752	15.3676	15.379	0.0216187	0.051348	no
-0.036695	0.458123	3.13e-09	0.348239	PDIA3		Protein disulfide-isomerase A3	P30101	18.1023	18.0503	18.0457	18.1393	18.0264	18.0665	18.0506	18.0474	0.031123	0.0258784	no
0.0504805	0.457833	3.13e-09	0.348472	STRN		Striatin	O43815	13.9655	14.0613	13.9647	14.1433	14.1018	14.067	14.0819	14.086	0.0602088	0.0432389	no
-0.0617886	0.457713	3.13e-09	0.348568	CIAO1		Probable cytosolic iron-sulfur protein assembly protein CIAO1	O76071	13.8293	13.8581	13.7725	13.9534	13.8396	13.7557	13.6762	13.8946	0.0528648	0.0595701	no
-0.0563181	0.45716	3.13e-09	0.349012	EIF2A		Eukaryotic translation initiation factor 2A	Q9BY44	14.7853	14.8786	14.7734	15.0015	14.7491	14.834	14.7967	14.8339	0.0745095	0.0571616	no
0.42663	0.45689	3.13e-09	0.349228	FNTB		Protein farnesyltransferase subunit beta	P49356	10.1635	10.119	10.5975	8.81615	11.3561	9.79925	10.1256	10.1217	0.427252	0.506161	no
0.255699	0.456587	3.13e-09	0.349473	WARS2		Tryptophan--tRNA ligase, mitochondrial	Q9UGM6	10.9178	10.7976	10.5944	9.73174	10.7745	11.1187	10.4511	10.7201	0.313574	0.246323	no
0.0338073	0.456549	3.13e-09	0.349503	TARS1		Threonine--tRNA ligase 1, cytoplasmic	P26639	17.3884	17.3799	17.4088	17.4089	17.4778	17.4025	17.4191	17.4217	0.0101649	0.0207996	no
-0.129848	0.455656	3.13e-09	0.350223	MYO18A		Unconventional myosin-XVIIIa	Q92614	13.7366	13.8854	13.8505	13.7825	13.8524	13.8508	13.2318	13.8007	0.0462479	0.128783	no
0.091924	0.455629	3.13e-09	0.350244	ZNF428		Zinc finger protein 428	Q96B54	12.915	13.0503	13.1907	13.1499	13.2413	12.9664	13.3448	13.121	0.0834896	0.0985388	no
0.398268	0.45516	3.13e-09	0.350622	CRYM-AS1		Putative uncharacterized protein CRYM-AS1	A6NIL9	12.3049	11.6613	13.1519	10.9208	12.6479	12.2168	12.6269	12.1405	0.645194	0.420824	no
0.0869533	0.455137	3.13e-09	0.350641	RBM34		RNA-binding protein 34	P42696	11.8653	11.828	12.0295	11.8638	11.8441	12.1807	11.938	11.9715	0.0642539	0.086234	no
0.153066	0.455109	3.13e-09	0.350664	NDUFS6		NADH dehydrogenase [ubiquinone] iron-sulfur protein 6, mitochondrial	O75380	10.8472	11.4387	11.111	11.0305	11.1319	11.0043	11.5257	11.3777	0.177036	0.16676	no
-0.0608929	0.45493	3.13e-09	0.350809	KPNA2		Importin subunit alpha-1	P52292	16.152	16.1434	16.0951	16.17	16.0673	16.253	15.9474	16.0492	0.0220336	0.0632445	no
-0.0735146	0.454905	3.13e-09	0.350828	GEMIN5		Gem-associated protein 5	Q8TEQ6	14.811	14.7486	14.6501	14.8484	14.5844	14.892	14.6694	14.6182	0.0593114	0.079466	no
0.135287	0.45457	3.13e-09	0.3511	RRAGC		Ras-related GTP-binding protein C	Q9HB90	12.0665	12.1946	12.2784	11.8851	12.5264	11.938	12.3756	12.1258	0.116152	0.152522	no
-0.0856966	0.454537	3.13e-09	0.351126	NUSAP1		Nucleolar and spindle-associated protein 1	Q9BXS6	12.4336	12.4863	12.3645	12.5785	12.1642	12.448	12.5121	12.3958	0.0628546	0.082731	no
-0.0866426	0.454364	3.13e-09	0.351266	RPS27A		Ubiquitin-40S ribosomal protein S27a	P62979	20.0042	20.1204	20.2095	20.116	19.9762	19.7967	20.1962	20.1343	0.0579429	0.0912786	no
-0.0767699	0.454107	3.13e-09	0.351473	RNF40		E3 ubiquitin-protein ligase BRE1B	O75150	12.8871	12.779	12.8897	12.9863	12.7749	13.0033	12.714	12.7429	0.0585396	0.0773663	no
-0.174349	0.453539	3.13e-09	0.351934	KIF20B		Kinesin-like protein KIF20B	Q96Q89	11.3295	11.166	11.025	11.2922	10.7986	11.5766	10.9661	10.7741	0.0937185	0.196701	no
-0.0766702	0.453522	3.13e-09	0.351948	STX12		Syntaxin-12	Q86Y82	12.5774	12.7719	12.841	12.8593	12.5648	12.7513	12.6857	12.741	0.0862695	0.0747716	no
0.152896	0.453516	3.13e-09	0.351953	FAM122B		Protein FAM122B	Q7Z309	11.5737	11.7417	11.269	11.9562	11.5643	11.6823	11.8919	12.0136	0.196295	0.164111	no
-0.0638223	0.453455	3.13e-09	0.352002	IGBP1		Immunoglobulin-binding protein 1	P78318	13.9398	13.9271	13.9195	13.9668	13.7425	13.7878	14.0064	13.9612	0.0144554	0.0620542	no
-0.249079	0.453455	3.13e-09	0.352002	MYCBP2		E3 ubiquitin-protein ligase MYCBP2	O75592	12.8271	12.6627	12.1088	12.9729	12.2452	12.8272	12.7227	11.7802	0.237887	0.264799	no
-0.0507847	0.4533	3.13e-09	0.352127	MRPS10		28S ribosomal protein S10, mitochondrial	P82664	12.9527	12.9518	12.9605	13.0132	12.8653	12.9734	12.8687	12.9675	0.0205378	0.0352286	no
0.148508	0.453267	3.13e-09	0.352155	PRKRIP1		PRKR-interacting protein 1	Q9H875	9.71242	9.76313	9.98189	9.72939	9.63452	10.1285	10.0535	9.96441	0.0902058	0.126967	no
-0.114002	0.452738	3.13e-09	0.352583	ANKS1A		Ankyrin repeat and SAM domain-containing protein 1A	Q92625	12.3923	12.3095	12.2216	12.5836	12.1735	12.5697	12.1325	12.1753	0.109498	0.127791	no
0.0426575	0.45254	3.13e-09	0.352744	JMJD6		Bifunctional arginine demethylase and lysyl-hydroxylase JMJD6	Q6NYC1	14.7933	14.8864	14.8353	14.8815	14.913	14.9223	14.8136	14.9182	0.030161	0.034482	no
-0.222304	0.452389	3.13e-09	0.352867	FAM204A		Protein FAM204A	Q9H8W3	9.52025	9.18452	9.55633	9.85239	9.29844	9.23123	8.91499	9.7796	0.187287	0.218045	no
-0.0567103	0.451885	3.13e-09	0.353276	UBE2I		SUMO-conjugating enzyme UBC9	P63279	18.0249	17.9886	18.023	18.1918	17.942	17.9304	18.0886	18.0405	0.0651054	0.0592969	no
-0.0509569	0.451758	3.13e-09	0.35338	POLA1		DNA polymerase alpha catalytic subunit	P09884	13.5119	13.5737	13.5423	13.6404	13.4654	13.4921	13.6069	13.5001	0.0384261	0.0425197	no
0.0607248	0.451416	3.13e-09	0.353659	PARD6B		Partitioning defective 6 homolog beta	Q9BYG5	12.489	12.4968	12.5468	12.461	12.4877	12.6195	12.4776	12.6516	0.0249148	0.0500748	no
0.163665	0.451231	3.13e-09	0.353809	TTPAL		Alpha-tocopherol transfer protein-like	Q9BTX7	10.8843	11.0243	11.3982	10.6965	11.3627	10.8496	11.2642	11.1816	0.214003	0.175861	no
-0.0557217	0.451148	3.13e-09	0.353877	CRLF3		Cytokine receptor-like factor 3	Q8IUI8	13.5128	13.5519	13.5183	13.5433	13.4225	13.62	13.4051	13.4559	0.0131506	0.0499919	no
-0.040618	0.45084	3.13e-09	0.354128	NAA15		N-alpha-acetyltransferase 15, NatA auxiliary subunit	Q9BXJ9	16.9669	16.8885	16.9585	17.0438	16.8884	16.947	16.9221	16.9378	0.0440943	0.0350017	no
0.0909672	0.450521	3.13e-09	0.354388	SEPTIN11		Septin-11	Q9NVA2	15.622	15.711	15.7415	15.6676	15.9632	15.4797	15.8611	15.802	0.0360083	0.102844	no
-0.0541707	0.449725	3.13e-09	0.355038	EIF3C		Eukaryotic translation initiation factor 3 subunit C	Q99613	16.9118	16.8661	16.9001	17.0191	16.8323	17.005	16.7968	16.8464	0.046587	0.0559718	no
0.102126	0.449684	3.13e-09	0.355072	PRDX2		Peroxiredoxin-2	P32119	18.6108	18.7594	18.7474	18.8987	19.1231	18.6034	18.8151	18.8833	0.0815765	0.120875	no
0.071162	0.449538	3.13e-09	0.355191	RPL26		60S ribosomal protein L26	P61254	16.3366	16.1324	16.3612	16.0743	16.3147	16.3956	16.2445	16.2344	0.0993782	0.0767259	no
-0.0663088	0.449461	3.13e-09	0.355254	MAGEB4		Melanoma-associated antigen B4	O15481	12.6229	12.6856	12.5344	12.734	12.654	12.6415	12.5349	12.4812	0.0592019	0.0594994	no
-0.0628899	0.449428	3.13e-09	0.355281	CYB5B		Cytochrome b5 type B	O43169	12.8212	12.6902	12.7651	12.765	12.585	12.8023	12.6535	12.7492	0.0370535	0.0545293	no
0.182097	0.448935	3.13e-09	0.355684	LATS1		Serine/threonine-protein kinase LATS1	O95835	9.43592	9.62156	9.28938	9.78102	9.73375	9.91298	9.32512	9.88442	0.148689	0.166806	yes
-0.0686432	0.448031	3.13e-09	0.356426	GEMIN2		Gem-associated protein 2	O14893	12.7663	12.7242	12.6026	12.6212	12.7071	12.6805	12.4872	12.5649	0.0550458	0.0633654	no
-0.0527198	0.446845	3.13e-09	0.357401	ATXN2		Ataxin-2	Q99700	12.6218	12.7264	12.6352	12.6146	12.5571	12.5903	12.6546	12.5851	0.0366161	0.0363899	no
-0.0495724	0.446222	3.13e-09	0.357913	TPRKB		EKC/KEOPS complex subunit TPRKB	Q9Y3C4	13.895	13.885	13.8375	13.981	13.832	13.7737	13.8827	13.9118	0.0418383	0.0428531	no
-0.209891	0.446136	3.13e-09	0.357985	FBXO5		F-box only protein 5	Q9UKT4	10.2481	10.3076	10.8108	10.9012	10.7585	10.479	10.2568	9.93379	0.230904	0.230514	no
-0.130292	0.446034	3.13e-09	0.358068	DDX24		ATP-dependent RNA helicase DDX24	Q9GZR7	12.8849	12.935	13.212	12.8982	12.6107	12.8519	12.7156	13.2308	0.112324	0.152433	no
-0.0442024	0.44596	3.13e-09	0.358129	CSTF1		Cleavage stimulation factor subunit 1	Q05048	15.0352	15.0246	15.0397	15.0383	15.0206	14.8771	15.0151	15.0481	0.00469956	0.0371863	no
-0.152404	0.445713	3.13e-09	0.358333	PKP3		Plakophilin-3	Q9Y446	14.8486	14.7163	14.6354	15.1302	14.2192	14.8798	14.8096	14.8122	0.156334	0.168876	no
-0.054214	0.445359	3.13e-09	0.358625	COMMD4		COMM domain-containing protein 4	Q9H0A8	12.7248	12.8071	12.7674	12.8432	12.6654	12.8096	12.7092	12.7415	0.0352992	0.0411402	no
0.0505308	0.445114	3.13e-09	0.358827	PPP5C		Serine/threonine-protein phosphatase 5	P53041	16.0733	16.0761	16.1254	16.0915	16.2284	15.9986	16.1855	16.1559	0.0166948	0.0503336	no
-0.0423845	0.445073	3.13e-09	0.358862	MAGEA1		Melanoma-associated antigen 1	P43355	14.5607	14.4996	14.5833	14.6385	14.4824	14.527	14.55	14.5532	0.0397672	0.0340794	no
-0.061865	0.443862	3.13e-09	0.359864	CASP2		Caspase-2	P42575	11.9367	11.9114	11.9426	12.0405	11.8393	11.9581	11.9157	11.8706	0.0400025	0.0421653	no
-0.187554	0.443653	3.13e-09	0.360037	DENND1A		DENN domain-containing protein 1A	Q8TEH3	10.4769	10.2312	9.89889	10.5152	10.4449	9.81874	9.87528	10.233	0.186066	0.194534	no
-0.10839	0.443594	3.13e-09	0.360085	PRKAR1A		cAMP-dependent protein kinase type I-alpha regulatory subunit	P10644	12.7113	12.5929	12.7224	12.4588	12.8332	12.4424	12.3489	12.4273	0.0836495	0.121871	yes
-0.0785296	0.443385	3.13e-09	0.360259	CNP		2',3'-cyclic-nucleotide 3'-phosphodiesterase	P09543	12.5826	12.5917	12.532	12.6833	12.4726	12.7407	12.4306	12.4316	0.0441018	0.0799893	no
-0.0447568	0.442536	3.13e-09	0.360964	PPP1R12A		Protein phosphatase 1 regulatory subunit 12A	O14974	14.0478	13.9474	13.9699	14.0081	13.8887	13.9788	14.0047	13.9219	0.0306975	0.0352609	no
0.0644962	0.442485	3.13e-09	0.361007	C12orf57		Protein C10	Q99622	13.3741	13.2996	13.4002	13.3374	13.4124	13.2548	13.552	13.45	0.0302931	0.0647963	no
0.0704517	0.442388	3.13e-09	0.361087	DLST		Dihydrolipoyllysine-residue succinyltransferase component of 2-oxoglutarate dehydrogenase complex, mitochondrial	P36957	16.0036	15.9415	16.087	15.8866	16.1904	15.918	16.1458	15.9462	0.0599897	0.0794916	no
0.0586271	0.442357	3.13e-09	0.361113	PARP1		Poly [ADP-ribose] polymerase 1	P09874	14.9948	14.9917	15.0195	14.8921	15.1573	15.0986	14.9317	14.945	0.0384122	0.0619388	no
0.100679	0.442351	3.13e-09	0.361118	RIDA		2-iminobutanoate/2-iminopropanoate deaminase	P52758	14.5868	14.6387	14.6582	14.4977	14.9347	14.3832	14.7771	14.6891	0.0490255	0.117506	no
-0.102542	0.44132	3.13e-09	0.361977	WAC		WW domain-containing adapter protein with coiled-coil	Q9BTA9	11.1497	11.2403	11.144	11.1926	11.0871	11.3338	10.8773	11.0183	0.0312143	0.0949578	no
-0.124287	0.440899	3.13e-09	0.362327	PMS2		Mismatch repair endonuclease PMS2	P54278	11.6107	11.4805	11.2519	11.8377	11.4572	11.5861	11.2916	11.3487	0.169401	0.138654	no
0.266599	0.44055	3.13e-09	0.362619	PDCD7		Programmed cell death protein 7	Q8N8D1	8.7131	8.9611	8.30713	8.38012	8.5308	9.43274	8.55137	8.91294	0.214494	0.280018	no
-0.0883103	0.440483	3.13e-09	0.362675	ARHGAP35		Rho GTPase-activating protein 35	Q9NRY4	13.0466	13.0461	13.2245	12.9093	12.945	12.8979	13.1873	12.843	0.0904805	0.0978749	no
0.628411	0.440389	3.13e-09	0.362753	ARHGAP29		Rho GTPase-activating protein 29	Q52LW3	13.969	13.7026	14.4003	10.9538	14.1914	13.9432	14.0661	13.3387	0.623899	0.419608	no
-0.159644	0.440352	3.13e-09	0.362784	TOR4A		Torsin-4A	Q9NXH8	10.3112	10.1396	10.1613	10.4306	10.1524	10.5023	9.84045	9.90897	0.0958725	0.158998	no
-0.135088	0.439992	3.13e-09	0.363084	TOR1A		Torsin-1A	O14656	10.1398	10.1475	10.2628	9.86195	10.0076	10.1463	9.76558	9.9522	0.113353	0.114486	no
0.0566995	0.439663	3.13e-09	0.36336	BAIAP2L1		Brain-specific angiogenesis inhibitor 1-associated protein 2-like protein 1	Q9UHR4	13.437	13.5225	13.5905	13.4994	13.5026	13.5229	13.6966	13.554	0.0440053	0.0546148	no
0.113661	0.439627	3.13e-09	0.36339	RAD9A		Cell cycle checkpoint control protein RAD9A	Q99638	12.0874	12.1969	12.2585	11.969	12.4914	11.9527	12.3323	12.19	0.0873023	0.127711	no
-0.334949	0.439278	3.13e-09	0.363682	SALL2		Sal-like protein 2	Q9Y467	9.08643	9.44447	9.48305	9.1456	9.20203	9.40359	7.84095	9.37318	0.139741	0.268504	no
-0.226162	0.439244	3.13e-09	0.363711	EDEM3		ER degradation-enhancing alpha-mannosidase-like protein 3	Q9BZQ6	10.8109	10.5754	10.7299	9.67863	10.3233	10.1107	10.1536	10.3026	0.302331	0.245675	no
-0.0625136	0.439227	3.13e-09	0.363725	TMA16		Translation machinery-associated protein 16	Q96EY4	12.9786	13.0637	12.9718	13.2067	12.9743	12.9372	13.0054	13.0539	0.0775145	0.0612853	no
0.11709	0.439183	3.13e-09	0.363762	TBC1D22A		TBC1 domain family member 22A	Q8WUA7	11.323	11.7329	11.7797	11.41	11.7493	11.5187	11.802	11.6439	0.15705	0.121465	no
0.0384228	0.439156	3.13e-09	0.363784	CDK6		Cyclin-dependent kinase 6	Q00534	15.6884	15.6784	15.7042	15.734	15.7419	15.6632	15.7954	15.7581	0.0168878	0.0311566	yes
-0.11414	0.43912	3.13e-09	0.363814	SERF2		Small EDRK-rich factor 2	P84101	12.6959	12.1257	12.5375	12.4157	12.3816	12.1611	12.4057	12.3698	0.161717	0.128873	no
-0.137238	0.438617	3.13e-09	0.364236	KLF1		Krueppel-like factor 1	Q13351	10.7681	10.8846	10.9875	10.7513	10.61	11.1161	10.5755	10.5409	0.0774118	0.145836	no
0.143064	0.437779	3.13e-09	0.36494	DTHD1		Death domain-containing protein 1	Q6ZMT9	11.7262	11.5172	11.7324	11.5303	12.1466	11.4061	11.8765	11.6492	0.0821797	0.171435	no
-0.0671418	0.436925	3.13e-09	0.365658	CAND2		Cullin-associated NEDD8-dissociated protein 2	O75155	13.3408	13.3409	13.3865	13.1709	13.2271	13.3167	13.1031	13.3236	0.064045	0.0666977	no
0.0773062	0.436908	3.13e-09	0.365673	AKT1S1		Proline-rich AKT1 substrate 1	Q96B36	14.0279	14.0251	14.1022	14.0302	14.1791	13.8815	14.2934	14.1407	0.026161	0.086041	no
0.0921722	0.435906	3.13e-09	0.366517	CEP85		Centrosomal protein of 85 kDa	Q6P2H3	11.7652	11.8542	11.9326	11.8445	11.8245	12.1899	11.791	11.9596	0.0474308	0.0999946	no
-0.0480075	0.435884	3.13e-09	0.366536	ARFGEF1		Brefeldin A-inhibited guanine nucleotide-exchange protein 1	Q9Y6D6	13.4317	13.3983	13.3776	13.4857	13.3967	13.4457	13.3218	13.3371	0.0329297	0.038023	no
0.0539927	0.435623	3.13e-09	0.366756	ATP6V1G1		V-type proton ATPase subunit G 1	O75348	14.277	14.2018	14.3216	14.2417	14.2201	14.2627	14.4393	14.3357	0.0353946	0.0543922	no
0.032947	0.435473	3.13e-09	0.366883	SDF2L1		Stromal cell-derived factor 2-like protein 1	Q9HCN8	16.0337	16.0535	16.0869	16.0656	16.1246	16.1117	16.066	16.0691	0.0154329	0.0208804	no
0.0747856	0.435261	3.13e-09	0.367062	SDHA		Succinate dehydrogenase [ubiquinone] flavoprotein subunit, mitochondrial	P31040	13.5838	13.3932	13.552	13.2789	13.6388	13.4344	13.5426	13.4913	0.0973277	0.0788616	no
-0.0805714	0.434814	3.13e-09	0.36744	THOC7		THO complex subunit 7 homolog	Q6I9Y2	13.0381	13.0205	12.8895	13.1336	12.8387	13.1584	12.8987	12.8637	0.0689643	0.0873462	no
0.124265	0.43391	3.13e-09	0.368205	CNPY4		Protein canopy homolog 4	Q8N129	10.9428	11.054	11.0425	10.8606	10.9218	10.8903	11.4338	11.1511	0.0625175	0.139877	no
-0.0620473	0.43375	3.13e-09	0.368341	NUDT4B		Diphosphoinositol polyphosphate phosphohydrolase NUDT4B	A0A024RBG1	13.1577	13.0856	13.0515	13.0074	12.9844	13.1086	13.0798	12.8812	0.0442437	0.0583879	no
0.106048	0.433723	3.13e-09	0.368364	GNAI2;GNAI1		Guanine nucleotide-binding protein G(i) subunit alpha-2;Guanine nucleotide-binding protein G(i) subunit alpha-1	P04899;P63096	10.0878	10.0877	10.0596	10.0369	10.2403	10.2625	10.0093	10.1842	0.0170185	0.0669996	no
0.0686435	0.43357	3.13e-09	0.368493	TBC1D4		TBC1 domain family member 4	O60343	11.9494	11.9695	11.9062	12.0955	12.0154	11.9454	12.1119	12.1226	0.0574441	0.0591426	no
0.0735904	0.433111	3.13e-09	0.368883	NUDCD1		NudC domain-containing protein 1	Q96RS6	16.257	16.2474	16.3107	16.2102	16.499	16.1025	16.4085	16.3097	0.0288849	0.0848469	no
0.0432986	0.432909	3.13e-09	0.369055	ANXA7		Annexin A7	P20073	16.8055	16.7553	16.81	16.6935	16.9011	16.759	16.7818	16.7956	0.0373061	0.0413602	no
-0.0966363	0.432892	3.13e-09	0.369069	SDHAF3		Succinate dehydrogenase assembly factor 3, mitochondrial	Q9NRP4	11.2824	11.2996	11.299	11.3025	10.9318	11.2128	11.3414	11.3109	0.00629932	0.0845594	no
0.0780839	0.432821	3.13e-09	0.36913	DERA		Deoxyribose-phosphate aldolase	Q9Y315	12.6974	12.7796	12.8521	12.7102	12.9546	12.6117	12.8976	12.8876	0.0498979	0.0812982	no
-0.0475911	0.432551	3.13e-09	0.369359	CNOT9		CCR4-NOT transcription complex subunit 9	Q92600	12.9874	12.9995	13.0271	13.0085	12.9627	13.0298	12.8857	12.954	0.0116068	0.0324141	no
0.0457377	0.432464	3.13e-09	0.369433	FBXO7		F-box only protein 7	Q9Y3I1	12.8873	12.8601	12.9329	12.9228	12.9413	12.9371	12.9949	12.9128	0.0231075	0.0276955	no
0.0789458	0.432361	3.13e-09	0.369521	RUFY3		Protein RUFY3	Q7L099	13.1369	13.1632	13.1973	13.2055	13.3575	13.0153	13.4079	13.238	0.0219202	0.0861833	no
-0.0745627	0.432256	3.13e-09	0.36961	ACP2		Lysosomal acid phosphatase	P11117	12.138	12.0504	11.9101	12.1629	11.9493	11.9494	11.9511	12.1133	0.0773948	0.0698248	no
-0.041452	0.432165	3.13e-09	0.369688	KLC1		Kinesin light chain 1	Q07866	15.2663	15.2574	15.222	15.2839	15.1363	15.2998	15.225	15.2027	0.0179768	0.0357796	no
0.214373	0.432014	3.13e-09	0.369816	NAA40		N-alpha-acetyltransferase 40	Q86UY6	10.8743	10.2357	11.28	10.7469	10.9713	11.3639	10.6308	11.0284	0.289595	0.239373	no
-0.0660575	0.43162	3.13e-09	0.370152	PCCA		Propionyl-CoA carboxylase alpha chain, mitochondrial	P05165	12.2223	12.1897	12.1693	11.9814	12.0613	12.06	12.0637	12.1134	0.0726193	0.0561583	no
-0.0475697	0.43133	3.13e-09	0.370399	MAPRE3		Microtubule-associated protein RP/EB family member 3	Q9UPY8	15.7799	15.7487	15.7832	15.8933	15.7358	15.6743	15.8506	15.7541	0.0446393	0.0476443	no
0.193055	0.431232	3.13e-09	0.370483	COG7		Conserved oligomeric Golgi complex subunit 7	P83436	12.475	12.7296	12.8073	11.8658	12.8075	12.8959	12.5831	12.3634	0.263785	0.206501	no
-0.0805813	0.430924	3.13e-09	0.370746	UNC13D		Protein unc-13 homolog D	Q70J99	12.3318	12.2057	12.152	12.4341	12.1403	12.2423	12.0861	12.3325	0.0886142	0.0826236	no
0.217618	0.430293	3.13e-09	0.371285	CHML		Rab proteins geranylgeranyltransferase component A 2	P26374	11.9023	11.6038	12.0245	11.2302	12.4176	11.4661	12.066	11.6816	0.232284	0.265777	no
-0.0804251	0.43015	3.13e-09	0.371407	RPL36A		60S ribosomal protein L36a	P83881	15.1776	15.2574	15.1406	15.4153	15.2507	14.9894	15.1021	15.3271	0.086495	0.0927297	no
-0.0807459	0.430114	3.13e-09	0.371438	ZMAT2		Zinc finger matrin-type protein 2	Q96NC0	12.1018	12.1702	12.0706	12.3524	12.048	11.9624	12.1696	12.192	0.0900633	0.0825042	no
-0.0507246	0.429994	3.13e-09	0.37154	ADO		2-aminoethanethiol dioxygenase	Q96SZ5	13.3517	13.3633	13.3098	13.4496	13.3199	13.2351	13.3277	13.3889	0.0411257	0.0434435	no
0.0425604	0.429536	3.13e-09	0.371932	PTPN23		Tyrosine-protein phosphatase non-receptor type 23	Q9H3S7	13.6236	13.6444	13.6171	13.6253	13.7355	13.6906	13.6493	13.6054	0.00815454	0.0307325	no
0.250367	0.428837	3.13e-09	0.372531	TANK		TRAF family member-associated NF-kappa-B activator	Q92844	11.2269	10.7873	11.1157	9.90883	10.9504	11.1557	10.7638	11.1704	0.348889	0.241642	no
0.0896299	0.428186	3.13e-09	0.37309	LRP1B		Low-density lipoprotein receptor-related protein 1B	Q9NZR2	11.7022	11.6137	11.6793	11.464	11.7251	11.8859	11.6788	11.5279	0.072483	0.0897974	no
0.113921	0.428162	3.13e-09	0.373111	PAXBP1		PAX3- and PAX7-binding protein 1	Q9Y5B6	12.2331	11.7658	12.1234	12.2911	12.2418	12.3785	12.0655	12.1832	0.152931	0.120754	no
-0.069478	0.428147	3.13e-09	0.373124	SDAD1		Protein SDA1 homolog	Q9NVU7	12.9646	12.9068	12.9064	13.0283	12.8605	13.0706	12.8421	12.755	0.0405901	0.0711433	no
-0.0459727	0.427934	3.13e-09	0.373307	PSMB3		Proteasome subunit beta type-3	P49720	16.37	16.3275	16.3982	16.4005	16.405	16.2066	16.3272	16.3735	0.0234107	0.0443512	no
0.0489054	0.427537	3.13e-09	0.373648	MED30		Mediator of RNA polymerase II transcription subunit 30	Q96HR3	13.2055	13.1913	13.2589	13.2088	13.3125	13.1612	13.3122	13.2743	0.0206283	0.0395562	no
0.126467	0.427504	3.13e-09	0.373677	RAD17		Cell cycle checkpoint protein RAD17	O75943	10.7585	10.8871	10.5299	10.7779	10.7515	11.0842	10.6083	11.0154	0.10092	0.131614	no
-0.14409	0.426931	3.13e-09	0.37417	PITX1		Pituitary homeobox 1	P78337	10.6971	10.7421	10.5341	10.9445	10.2547	10.9161	10.5909	10.5797	0.11818	0.150333	no
-0.0403861	0.426808	3.13e-09	0.374276	MOV10		Helicase MOV-10	Q9HCE1	13.892	13.8514	13.8406	13.9116	13.7839	13.8675	13.8201	13.8626	0.0232403	0.02771	no
0.0584591	0.426499	3.13e-09	0.374542	PDCL3		Phosducin-like protein 3	Q9H2J4	15.0392	15.096	15.0827	15.0772	15.2245	14.9451	15.2066	15.1528	0.0167962	0.0627017	no
-0.0854948	0.426445	3.13e-09	0.374589	CTBP1		C-terminal-binding protein 1	Q13363	15.411	15.4507	15.4491	15.4929	15.2902	15.4302	15.6151	15.1262	0.0232115	0.0973674	no
-0.504732	0.426321	3.13e-09	0.374696	SCN8A		Sodium channel protein type 8 subunit alpha	Q9UQD0	7.13734	7.30787	6.83651	6.45417	6.67057	7.04318	5.71501	6.2882	0.247071	0.324842	no
-0.0479172	0.426158	3.13e-09	0.374837	UBE2E3		Ubiquitin-conjugating enzyme E2 E3	Q969T4	14.8265	14.843	14.7633	14.9778	14.7678	14.8237	14.7931	14.8344	0.0635984	0.0481138	no
-0.0848197	0.425638	3.13e-09	0.375286	LMO2		Rhombotin-2	P25791	10.9552	10.9556	10.9094	11.1644	10.9315	10.9253	10.8347	10.9538	0.0819416	0.0680118	no
-0.0800964	0.425618	3.13e-09	0.375303	BAG5		BAG family molecular chaperone regulator 5	Q9UL15	12.5738	12.587	12.4456	12.7365	12.3163	12.5375	12.5832	12.5855	0.0829297	0.0831961	no
0.088282	0.425097	3.13e-09	0.375754	IMPA1		Inositol monophosphatase 1	P29218	16.0877	16.1904	16.2411	16.1122	16.4233	15.9555	16.3646	16.2412	0.0491819	0.104528	no
0.0446345	0.424599	3.13e-09	0.376184	RIOK2		Serine/threonine-protein kinase RIO2	Q9BVS4	13.8058	13.8553	13.8271	13.8962	13.8499	13.9546	13.8275	13.931	0.0271958	0.0373095	yes
-0.125066	0.424593	3.13e-09	0.37619	TRIM56		E3 ubiquitin-protein ligase TRIM56	Q9BRZ2	11.3049	11.4201	10.9987	11.4044	11.0735	11.4259	11.1854	10.943	0.127975	0.134216	no
-0.0647902	0.424297	3.13e-09	0.376447	NUP205		Nuclear pore complex protein Nup205	Q92621	13.8382	13.7954	13.8358	13.9636	13.8285	13.9416	13.6476	13.7561	0.0515309	0.0687927	no
-0.0713589	0.424123	3.13e-09	0.376597	WASH6P		WAS protein family homolog 6	Q9NQA3	12.0141	12.189	12.1315	12.0818	12.0489	11.8734	12.1316	12.077	0.0513864	0.0645096	no
-0.0883766	0.423097	3.13e-09	0.377488	CENPU		Centromere protein U	Q71F23	11.8082	11.7882	11.6278	11.7984	11.5608	11.8905	11.5375	11.6804	0.0576266	0.0886454	no
0.0450078	0.423056	3.13e-09	0.377524	PRPF31		U4/U6 small nuclear ribonucleoprotein Prp31	Q8WWY3	15.4117	15.4647	15.4808	15.3183	15.5228	15.4311	15.4887	15.413	0.0500244	0.0431223	no
0.19344	0.422902	3.13e-09	0.377658	IKBKB		Inhibitor of nuclear factor kappa-B kinase subunit beta	O14920	12.0654	11.932	12.156	11.7065	12.7487	12.2589	11.7083	11.9178	0.131381	0.261408	yes
-0.121791	0.422709	3.13e-09	0.377826	ACSF3		Malonate--CoA ligase ACSF3, mitochondrial	Q4G176	11.7194	11.7392	11.8102	11.5886	11.5513	11.9633	11.312	11.5436	0.0631312	0.136392	no
-0.035941	0.422549	3.13e-09	0.377965	TBL1XR1		F-box-like/WD repeat-containing protein TBL1XR1	Q9BZK7	14.6257	14.6206	14.6008	14.6664	14.593	14.5445	14.6093	14.6229	0.0191775	0.0238671	no
0.209172	0.422509	3.13e-09	0.377999	SLU7		Pre-mRNA-splicing factor SLU7	O95391	9.89458	10.3554	10.7368	10.4871	10.4218	10.7651	10.1475	10.9762	0.23193	0.23788	no
-0.0805823	0.420947	3.13e-09	0.379361	PPM1E		Protein phosphatase 1E	Q8WY54	12.8288	12.9076	13.0799	12.9336	12.9285	12.631	12.9506	12.9174	0.0739064	0.0854805	no
-0.116512	0.420619	3.13e-09	0.379648	GTPBP3		tRNA modification GTPase GTPBP3, mitochondrial	Q969Y2	10.823	10.8302	10.8342	11.1663	10.698	11.0495	10.6575	10.7826	0.123572	0.123907	no
0.0455046	0.420539	3.13e-09	0.379718	USP14		Ubiquitin carboxyl-terminal hydrolase 14	P54578	16.7224	16.861	16.7881	16.864	16.9504	16.8143	16.8445	16.8082	0.0463562	0.046216	no
0.0649943	0.420447	3.13e-09	0.379798	RO60		60 kDa SS-A/Ro ribonucleoprotein	P10155	16.5769	16.6572	16.6756	16.6552	16.7989	16.4856	16.7945	16.7458	0.0300056	0.073381	no
0.0833336	0.420352	3.13e-09	0.379882	DDAH2		N(G),N(G)-dimethylarginine dimethylaminohydrolase 2	O95865	13.0931	13.1369	13.244	13.1003	13.409	12.976	13.295	13.2277	0.0492029	0.0947222	no
-0.0839869	0.420271	3.13e-09	0.379953	PPP2R2D		Serine/threonine-protein phosphatase 2A 55 kDa regulatory subunit B delta isoform	Q66LE6	12.6644	12.5818	12.5536	12.5186	12.39	12.7596	12.4547	12.3782	0.0435488	0.0928408	no
-0.073048	0.420176	3.13e-09	0.380036	RMI2		RecQ-mediated genome instability protein 2	Q96E14	11.7436	11.7284	11.7099	11.7082	11.6186	11.8357	11.5739	11.5697	0.0116496	0.0638834	no
-0.233083	0.420022	3.13e-09	0.38017	AGO3		Protein argonaute-3	Q9H9G7	9.79647	10.3541	10.6525	9.63012	9.63201	9.67369	10.2821	9.91299	0.330086	0.286856	no
0.0484885	0.419824	3.13e-09	0.380343	FIP1L1		Pre-mRNA 3'-end-processing factor FIP1	Q6UN15	14.4731	14.5512	14.5316	14.4765	14.6571	14.4412	14.5569	14.5712	0.0272519	0.0480042	no
0.0688061	0.419698	3.13e-09	0.380454	TFG		Protein TFG	Q92734	16.2046	16.33	16.3465	16.28	16.2625	16.1941	16.5038	16.4759	0.0436671	0.081227	no
-0.0422656	0.419412	3.13e-09	0.380704	SH3GL1		Endophilin-A2	Q99961	13.8798	13.9048	13.8672	13.9952	13.8432	13.8712	13.854	13.9096	0.0406802	0.0339785	no
-0.0620149	0.419028	3.13e-09	0.381042	RPRD2		Regulation of nuclear pre-mRNA domain-containing protein 2	Q5VT52	12.4269	12.4061	12.3945	12.3685	12.2966	12.2662	12.2873	12.4978	0.0168775	0.055456	no
0.0730681	0.418858	3.13e-09	0.38119	SAR1A		GTP-binding protein SAR1a	Q9NR31	13.8056	13.7144	13.455	13.6188	13.6672	13.8392	13.7082	13.6715	0.102115	0.0798815	no
-0.0451762	0.4186	3.13e-09	0.381417	PGPEP1		Pyroglutamyl-peptidase 1	Q9NXJ5	13.8474	13.8068	13.792	13.8336	13.7658	13.8701	13.7679	13.6954	0.0174084	0.0380694	no
-0.150745	0.418539	3.13e-09	0.38147	TOR1B		Torsin-1B	O14657	10.5413	10.3749	10.3942	9.99519	10.0297	10.482	9.98049	10.2104	0.15241	0.156161	no
0.141065	0.41817	3.13e-09	0.381795	COLGALT2		Procollagen galactosyltransferase 2	Q8IYK4	10.8266	10.7582	10.7266	11.3874	10.9833	11.2091	10.9782	11.0925	0.23656	0.16341	no
-0.0873071	0.417837	3.13e-09	0.382088	KHK		Ketohexokinase	P50053	11.6666	11.6972	11.6159	11.7008	11.5876	11.3356	11.6798	11.7282	0.0269713	0.0815796	yes
-0.162366	0.417811	3.13e-09	0.38211	GID4		Glucose-induced degradation protein 4 homolog	Q8IVV7	10.5203	10.7012	10.6325	10.1709	10.5549	10.6034	10.226	9.99094	0.153479	0.170038	no
0.0785862	0.417715	3.13e-09	0.382195	UBE2Z		Ubiquitin-conjugating enzyme E2 Z	Q9H832	14.4846	14.4101	14.3031	14.4629	14.6184	14.2399	14.5921	14.5248	0.0551814	0.0901331	no
0.54862	0.41771	3.13e-09	0.3822	POT1		Protection of telomeres protein 1	Q9NUX5	7.67632	8.39354	5.88766	7.80889	8.68511	7.93262	8.29938	7.04378	0.552282	0.471294	no
0.0448057	0.417611	3.13e-09	0.382287	ENDOG		Endonuclease G, mitochondrial	Q14249	13.9724	14.0512	14.0821	14.0876	14.1735	14.094	14.0694	14.0356	0.0362902	0.0396391	no
0.0458171	0.41754	3.13e-09	0.382349	UBA2		SUMO-activating enzyme subunit 2	Q9UBT2	17.3029	17.3211	17.3616	17.2995	17.3745	17.246	17.4691	17.3786	0.0199096	0.0472677	no
0.0622997	0.417221	3.13e-09	0.38263	TPI1		Triosephosphate isomerase	P60174	20.4521	20.4623	20.5495	20.4208	20.6032	20.347	20.6259	20.5578	0.0387085	0.0666343	no
0.0606496	0.417193	3.13e-09	0.382655	MRPS28		28S ribosomal protein S28, mitochondrial	Q9Y2Q9	14.9184	14.8879	14.9797	14.9187	15.1211	14.8109	15.0559	14.9592	0.0268963	0.0681619	no
0.0767836	0.416252	3.13e-09	0.383485	CHMP2A		Charged multivesicular body protein 2a	O43633	14.7816	14.9552	14.853	14.8863	15.0775	14.6898	15.0255	14.9904	0.0499905	0.0888441	no
-0.0721407	0.416191	3.13e-09	0.383538	APEX1		DNA-(apurinic or apyrimidinic site) lyase	P27695	16.8486	16.8196	16.8131	16.8001	16.7914	16.9508	16.5237	16.7271	0.0142776	0.081654	no
0.171687	0.41591	3.13e-09	0.383787	TRMT10A		tRNA methyltransferase 10 homolog A	Q8TBZ6	8.84632	8.93632	8.91304	8.81538	9.03563	8.74872	9.27806	9.1354	0.0390626	0.126694	no
0.108565	0.415897	3.13e-09	0.383799	MEF2C		Myocyte-specific enhancer factor 2C	Q06413	10.9853	10.6178	10.7221	10.8119	10.8737	10.6871	11.0458	10.9647	0.109529	0.106696	no
0.0719741	0.41572	3.13e-09	0.383955	RAB10		Ras-related protein Rab-10	P61026	15.4622	15.5716	15.5133	15.593	15.7468	15.3659	15.668	15.6473	0.0407415	0.0835036	no
-0.121911	0.415511	3.13e-09	0.384139	ERCC4		DNA repair endonuclease XPF	Q92889	10.2836	10.5104	10.3616	10.3805	10.2477	10.2353	10.0245	10.5412	0.0660604	0.112585	no
0.0977659	0.415467	3.13e-09	0.384178	PCBD1		Pterin-4-alpha-carbinolamine dehydratase	P61457	13.8598	14.0385	13.9609	13.9541	14.1863	13.6989	14.1539	14.1652	0.0504839	0.114059	no
0.0615483	0.415373	3.13e-09	0.384261	SPART		Spartin	Q8N0X7	12.561	12.5338	12.4463	12.6961	12.6765	12.5457	12.6338	12.6273	0.072582	0.0572647	no
0.33294	0.415258	3.13e-09	0.384364	TNFRSF10B		Tumor necrosis factor receptor superfamily member 10B	O14763	7.56913	8.95777	7.95405	8.97266	8.82807	8.88362	8.34198	8.73171	0.456063	0.308287	no
-0.124154	0.415165	3.13e-09	0.384446	CKS2		Cyclin-dependent kinases regulatory subunit 2	P33552	12.037	12.3137	12.4319	12.6283	11.9855	12.3579	12.1828	12.3881	0.167825	0.147072	no
-0.112752	0.415075	3.13e-09	0.384525	TRA2A		Transformer-2 protein homolog alpha	Q13595	10.8254	10.6497	10.8168	10.7605	10.7976	10.7495	10.3363	10.718	0.0550069	0.101493	no
0.0805391	0.415037	3.13e-09	0.384559	PLA2G12A		Group XIIA secretory phospholipase A2	Q9BZM1	11.2809	11.1568	11.3271	11.3906	11.4721	11.3778	11.3982	11.2295	0.0675422	0.0700529	no
-0.0689206	0.41492	3.13e-09	0.384663	CTNND1		Catenin delta-1	O60716	12.8852	12.891	12.8345	12.9414	12.8639	12.9899	12.6551	12.7675	0.0302756	0.070541	no
0.0570802	0.414855	3.13e-09	0.384721	ELP4		Elongator complex protein 4	Q96EB1	12.6583	12.6804	12.7549	12.8149	12.7703	12.686	12.8169	12.8637	0.0499215	0.0518102	no
-0.197877	0.414788	3.13e-09	0.384779	TMEM50B		Transmembrane protein 50B	P56557	10.7605	10.535	11.305	10.682	10.4938	10.6218	10.2605	11.115	0.252451	0.249493	no
-0.192854	0.414681	3.13e-09	0.384874	SYNJ2		Synaptojanin-2	O15056	10.2338	10.1963	10.0439	10.0032	9.47551	10.4847	10.027	9.7185	0.0780985	0.208448	no
-0.0721031	0.41451	3.13e-09	0.385026	PDPR		Pyruvate dehydrogenase phosphatase regulatory subunit, mitochondrial	Q8NCN5	12.9203	12.8129	12.9135	12.8512	12.9154	12.5838	12.8232	12.8872	0.0355455	0.072591	no
0.0611751	0.413656	3.13e-09	0.385783	PDIA6		Protein disulfide-isomerase A6	Q15084	19.4328	19.4696	19.4935	19.5084	19.5823	19.3433	19.6667	19.5566	0.0227611	0.0680493	no
0.0538975	0.413585	3.13e-09	0.385847	MRPL12		39S ribosomal protein L12, mitochondrial	P52815	15.9115	15.9561	15.9497	15.9898	16.0891	15.8341	16.0827	16.0168	0.0222318	0.0590297	no
0.0353068	0.413522	3.13e-09	0.385902	G3BP1		Ras GTPase-activating protein-binding protein 1	Q13283	16.1429	16.0844	16.1722	16.1871	16.2169	16.1833	16.1358	16.1917	0.0311817	0.0285543	no
0.0595747	0.413137	3.13e-09	0.386245	PBDC1		Protein PBDC1	Q9BVG4	15.7481	15.7837	15.845	15.8837	15.8896	15.6923	15.9798	15.9371	0.0421189	0.0671367	no
-0.200583	0.413072	3.13e-09	0.386303	BORA		Protein aurora borealis	Q6PGQ7	10.8847	10.822	11.0261	10.6545	10.6493	9.97877	11.0858	10.8711	0.106018	0.206137	no
-0.0396946	0.412822	3.13e-09	0.386526	PCYT2		Ethanolamine-phosphate cytidylyltransferase	Q99447	15.1607	15.1727	15.1071	15.2715	15.1197	15.1558	15.1275	15.1501	0.0480413	0.0361486	no
0.0544899	0.412506	3.13e-09	0.386807	GTF2F2		General transcription factor IIF subunit 2	P13984	15.1827	15.1691	15.2	15.1218	15.3464	15.08	15.2892	15.1761	0.0230881	0.0604065	no
0.390607	0.412491	3.13e-09	0.386821	EPB41L3		Band 4.1-like protein 3	Q9Y2J2	10.2183	10.3212	10.0426	8.77421	10.9766	9.80401	10.7003	9.43782	0.38359	0.442083	no
-0.114507	0.412482	3.13e-09	0.386828	PPP2R5A		Serine/threonine-protein phosphatase 2A 56 kDa regulatory subunit alpha isoform	Q15172	12.0489	11.7873	12.0056	12.227	11.8022	12.1114	11.6567	12.0406	0.123943	0.130432	no
-0.302341	0.412016	3.13e-09	0.387244	DGKZ		Diacylglycerol kinase zeta	Q13574	8.89088	8.38218	9.71842	9.60459	9.28902	8.94565	8.54191	8.61012	0.400031	0.354139	yes
0.045307	0.411875	3.13e-09	0.387369	PYM1		Partner of Y14 and mago	Q9BRP8	13.3636	13.2666	13.3439	13.3797	13.3442	13.3511	13.4525	13.3874	0.0342779	0.0360918	no
0.0623837	0.411832	3.13e-09	0.387407	RBM39		RNA-binding protein 39	Q14498	14.6707	14.6136	14.5666	14.6211	14.62	14.8839	14.5677	14.6499	0.0295799	0.0743514	no
-0.199287	0.411699	3.13e-09	0.387526	SPATS2		Spermatogenesis-associated serine-rich protein 2	Q86XZ4	10.0573	10.1364	9.84694	10.2979	9.94319	10.1093	9.26132	10.2275	0.128269	0.1948	no
-0.16587	0.41153	3.13e-09	0.387677	EFL1		Elongation factor-like GTPase 1	Q7Z2Z2	14.9306	14.996	14.524	15.3485	14.947	14.9308	14.8979	14.3599	0.230642	0.204302	no
0.0770148	0.411471	3.13e-09	0.387729	GTSF1		Gametocyte-specific factor 1	Q8WW33	15.681	15.7104	15.8372	15.7086	15.8815	15.5435	15.9361	15.8842	0.0495052	0.0906889	no
0.17151	0.411158	3.13e-09	0.388009	ATG4C		Cysteine protease ATG4C	Q96DT6	10.5819	10.5041	10.1632	9.84419	10.4983	10.1619	10.4226	10.6967	0.224151	0.182763	no
-0.040612	0.411003	3.13e-09	0.388147	HBQ1		Hemoglobin subunit theta-1	P09105	14.8885	14.8595	14.8331	14.7672	14.856	14.7937	14.7326	14.8035	0.0356058	0.0360002	no
0.188103	0.410893	3.13e-09	0.388246	SYCE3		Synaptonemal complex central element protein 3	A1L190	10.3679	10.3813	10.6879	10.5935	11.0454	10.0738	10.9483	10.7156	0.110459	0.217842	no
-0.0699999	0.410331	3.13e-09	0.388749	FBXO6		F-box only protein 6	Q9NRD1	12.6345	12.6488	12.7252	12.9013	12.5602	12.6064	12.7101	12.7532	0.0874711	0.0756079	no
0.0610386	0.409956	3.13e-09	0.389085	RMC1		Regulator of MON1-CCZ1 complex	Q96DM3	12.4547	12.4311	12.4389	12.3316	12.6089	12.3853	12.4187	12.4875	0.0380321	0.0575109	no
0.572904	0.409722	3.13e-09	0.389295	KLF16		Krueppel-like factor 16	Q9BXK1	6.92325	5.33152	6.23515	7.25278	7.49311	7.54898	6.11388	6.87835	0.508801	0.454246	no
0.056288	0.40962	3.13e-09	0.389386	PPIG		Peptidyl-prolyl cis-trans isomerase G	Q13427	12.6152	12.734	12.636	12.8044	12.6954	12.7736	12.7296	12.8162	0.0615097	0.0506683	no
0.184867	0.409411	3.13e-09	0.389573	GSPT2		Eukaryotic peptide chain release factor GTP-binding subunit ERF3B	Q8IYD1	10.7223	10.3401	11.0596	10.1207	10.9562	10.5863	10.8661	10.5736	0.290713	0.210499	no
-0.0372524	0.409048	3.13e-09	0.389899	HSD17B10		3-hydroxyacyl-CoA dehydrogenase type-2	Q99714	15.8886	15.8977	15.8167	15.958	15.8587	15.885	15.8111	15.8572	0.0400069	0.0329864	no
-0.0679037	0.408985	3.13e-09	0.389955	PPP6R1		Serine/threonine-protein phosphatase 6 regulatory subunit 1	Q9UPN7	14.3029	14.3293	14.2233	14.5155	14.2454	14.1513	14.2979	14.4047	0.0878742	0.0795427	no
-0.0889654	0.408954	3.13e-09	0.389983	DPH7		Diphthine methyltransferase	Q9BTV6	11.6799	11.7816	11.8176	11.9914	11.9324	11.7235	11.5961	11.6626	0.0914547	0.0960052	no
0.426542	0.408685	3.13e-09	0.390225	ALKBH7		Alpha-ketoglutarate-dependent dioxygenase alkB homolog 7, mitochondrial	Q9BT30	9.69692	10.0045	9.81828	7.70145	9.75225	9.30725	9.91128	9.95655	0.492056	0.335979	no
0.224073	0.408457	3.13e-09	0.39043	COLEC11		Collectin-11	Q9BWP8	10.7191	10.7664	10.9871	10.1448	11.3592	11.0506	10.2885	10.8155	0.227703	0.266115	no
-0.0552881	0.40824	3.13e-09	0.390625	AAMP		Angio-associated migratory cell protein	Q13685	13.1705	13.3037	13.228	13.3577	13.2042	13.1087	13.274	13.2519	0.0570903	0.0539498	no
0.0464675	0.408019	3.13e-09	0.390824	EPS15L1		Epidermal growth factor receptor substrate 15-like 1	Q9UBC2	14.8717	14.8568	14.717	14.7546	14.8184	14.7783	14.9035	14.8858	0.0525171	0.0463961	no
0.0373233	0.407878	3.13e-09	0.39095	ARID3A		AT-rich interactive domain-containing protein 3A	Q99856	14.6083	14.6295	14.6454	14.5787	14.6749	14.7114	14.6177	14.6071	0.0199577	0.0295862	no
-0.37166	0.407635	3.13e-09	0.39117	GSTT1		Glutathione S-transferase theta-1	P30711	9.48318	8.73988	8.96112	8.33462	7.78074	9.28491	7.91041	9.05609	0.338381	0.399039	no
-0.227894	0.407265	3.13e-09	0.391503	ATP1A1		Sodium/potassium-transporting ATPase subunit alpha-1	P05023	11.2345	10.1089	10.5433	10.2252	10.6499	10.4118	10.0338	10.1047	0.384262	0.31731	no
-0.0528545	0.406858	3.13e-09	0.39187	SEPTIN5		Septin-5	Q99719	16.4018	16.3255	16.3661	16.5	16.3554	16.2068	16.4298	16.3901	0.0523809	0.0581304	no
-0.0693807	0.406725	3.13e-09	0.39199	ATG12		Ubiquitin-like protein ATG12	O94817	12.6736	12.7403	12.5784	12.867	12.6298	12.5265	12.6917	12.7337	0.0846439	0.0739272	no
-0.0616594	0.406193	3.13e-09	0.39247	THUMPD3		THUMP domain-containing protein 3	Q9BV44	14.9586	14.8694	14.9646	15.1098	14.7598	14.9152	14.9932	14.9876	0.0699379	0.0700445	no
-0.0384324	0.405379	3.13e-09	0.393207	NQO2		Ribosyldihydronicotinamide dehydrogenase [quinone]	P16083	15.5677	15.515	15.5417	15.4459	15.4746	15.4155	15.518	15.5084	0.035973	0.0345742	no
-0.115242	0.405261	3.13e-09	0.393314	COQ5		2-methoxy-6-polyprenyl-1,4-benzoquinol methylase, mitochondrial	Q5HYK3	10.5906	10.5465	10.6789	10.3813	10.6086	10.5827	10.2155	10.3295	0.0848982	0.108919	no
0.0514093	0.405138	3.13e-09	0.393425	EXOSC8		Exosome complex component RRP43	Q96B26	15.2066	15.2022	15.2986	15.169	15.3436	15.1415	15.3598	15.2371	0.0390865	0.05635	no
0.136134	0.405069	3.13e-09	0.393488	NSMCE3		Non-structural maintenance of chromosomes element 3 homolog	Q96MG7	11.8041	11.6985	12.0834	11.2806	11.8439	11.9389	11.8953	11.7331	0.222447	0.151585	no
-0.136001	0.404975	3.13e-09	0.393573	CYB5R4		Cytochrome b5 reductase 4	Q7L1T6	10.9729	11.2396	10.7684	10.7715	10.8328	11.1057	10.7092	10.5607	0.160281	0.158361	no
-0.438093	0.404518	3.13e-09	0.393987	CNN1		Calponin-1	P51911	12.3316	10.2481	10.1325	10.3227	9.58287	10.2827	10.5791	10.8379	0.900422	0.792925	no
0.0649424	0.404397	3.13e-09	0.394097	PSPH		Phosphoserine phosphatase	P78330	15.9067	15.9101	15.9657	15.8415	16.0794	15.7767	16.1048	15.9228	0.0351153	0.0774638	no
0.0558321	0.403922	3.13e-09	0.394528	PLPBP		Pyridoxal phosphate homeostasis protein	O94903	13.1694	13.1369	13.0691	13.0015	13.2678	13.1517	13.0853	13.0955	0.0513522	0.0554932	no
0.12858	0.403476	3.13e-09	0.394933	IFRD1		Interferon-related developmental regulator 1	O00458	9.36692	9.70461	9.48718	9.40703	9.57565	9.57562	9.5977	9.7311	0.108114	0.0895045	no
-0.169278	0.403178	3.13e-09	0.395204	BORCS6		BLOC-1-related complex subunit 6	Q96GS4	10.5846	10.4504	10.6359	11.0451	10.2133	10.2554	10.6895	10.8806	0.188425	0.200882	no
0.129917	0.403108	3.13e-09	0.395268	SMG5		Protein SMG5	Q9UPR3	10.5148	10.6572	10.5747	10.2221	10.922	10.577	10.5864	10.403	0.124897	0.141311	no
0.118927	0.402784	3.13e-09	0.395563	AP1M1		AP-1 complex subunit mu-1	Q9BXS5	13.6903	13.9488	13.7992	13.6305	14.2394	13.5545	13.844	13.9066	0.0984789	0.156228	no
-0.0832311	0.402332	3.13e-09	0.395976	PBX2		Pre-B-cell leukemia transcription factor 2	P40425	11.4383	11.6762	11.58	11.5617	11.4213	11.6596	11.3339	11.5085	0.0672779	0.0824271	no
-0.0453679	0.402299	3.13e-09	0.396005	RPS6		40S ribosomal protein S6	P62753	18.7191	18.6527	18.6234	18.6822	18.5978	18.7533	18.5724	18.5723	0.0284126	0.0471185	no
-0.0570485	0.402187	3.13e-09	0.396107	IPO4		Importin-4	Q8TEX9	16.2619	16.2196	16.3837	16.3649	16.1911	16.1217	16.3405	16.3486	0.0548402	0.0649792	no
-0.0705254	0.401867	3.13e-09	0.3964	MED6		Mediator of RNA polymerase II transcription subunit 6	O75586	12.2323	12.1064	12.1119	11.9765	11.984	12.1818	11.9937	11.9855	0.0722186	0.0707673	no
0.0388976	0.401469	3.13e-09	0.396763	WDR77		Methylosome protein 50	Q9BQA1	16.8236	16.7905	16.8177	16.8403	16.9228	16.7522	16.8811	16.8716	0.0142993	0.0374455	no
-0.0881101	0.401416	3.13e-09	0.396811	SRCAP		Helicase SRCAP	Q6ZRS2	11.3467	11.4937	11.5323	11.3285	11.2672	11.5551	11.2141	11.3124	0.0712604	0.0897977	no
-0.0383236	0.401246	3.13e-09	0.396967	CAPN2		Calpain-2 catalytic subunit	P17655	15.2676	15.2754	15.2206	15.2931	15.2212	15.1473	15.2981	15.2368	0.021323	0.0340636	no
0.0614033	0.40104	3.13e-09	0.397155	CIT		Citron Rho-interacting kinase	O14578	11.8083	11.8929	11.8676	11.9004	11.8426	12.0447	11.9474	11.8801	0.0286687	0.0510928	yes
0.0454154	0.40104	3.13e-09	0.397155	HBS1L		HBS1-like protein	Q9Y450	14.0164	14.0002	14.0311	13.9314	14.1365	14.0588	13.966	13.9995	0.0302233	0.0433915	no
0.155079	0.400813	3.13e-09	0.397362	VPS8		Vacuolar protein sorting-associated protein 8 homolog	Q8N3P4	11.0637	10.9902	11.2028	10.591	11.4925	11.1595	10.814	11.002	0.170739	0.186359	no
0.110246	0.400657	3.13e-09	0.397506	PUS3		tRNA pseudouridine(38/39) synthase	Q9BZE2	10.4467	10.3631	10.178	10.4178	10.4102	10.7084	10.3294	10.3985	0.0809384	0.106373	no
-0.138715	0.40064	3.13e-09	0.397521	N4BP2		NEDD4-binding protein 2	Q86UW6	11.2775	11.5433	11.6056	11.4209	11.3975	11.5207	10.8557	11.5184	0.0987482	0.147746	no
0.0589504	0.400428	3.13e-09	0.397715	NME2		Nucleoside diphosphate kinase B	P22392	20.7673	20.7659	20.8965	20.9016	20.9355	20.7364	20.9835	20.9118	0.0529875	0.0632947	no
0.059719	0.400352	3.13e-09	0.397785	EIF1AX		Eukaryotic translation initiation factor 1A, X-chromosomal	P47813	15.7299	15.7048	15.8649	15.8007	15.8657	15.651	15.8817	15.9408	0.0504856	0.0692097	no
0.137524	0.399789	3.13e-09	0.398301	CFAP20		Cilia- and flagella-associated protein 20	Q9Y6A4	14.291	14.3358	14.4417	13.7948	14.665	14.2177	14.3936	14.137	0.182133	0.168786	no
-0.0509953	0.399505	3.13e-09	0.398561	MDC1		Mediator of DNA damage checkpoint protein 1	Q14676	13.5835	13.5071	13.5381	13.7142	13.5082	13.4972	13.5305	13.6029	0.0645504	0.0518697	no
0.0904487	0.399497	3.13e-09	0.398568	CCDC97		Coiled-coil domain-containing protein 97	Q96F63	12.0963	12.1902	12.2407	12.3164	12.1941	12.1037	12.5489	12.3586	0.0637338	0.108104	no
-0.0919442	0.399236	3.13e-09	0.398808	MTMR3		Myotubularin-related protein 3	Q13615	11.7932	11.5968	11.7122	12.0406	11.6209	11.7043	11.6283	11.8216	0.134203	0.10645	no
-0.0613962	0.398305	3.13e-09	0.399664	AKT2		RAC-beta serine/threonine-protein kinase	P31751	12.316	12.2502	12.0755	12.1918	12.1462	12.0863	12.1968	12.1587	0.0699411	0.0561546	yes
0.0444812	0.398201	3.13e-09	0.399759	TAB1		TGF-beta-activated kinase 1 and MAP3K7-binding protein 1	Q15750	12.7408	12.6885	12.7469	12.7966	12.7622	12.8246	12.7858	12.778	0.0306182	0.0284285	no
-0.0511117	0.398182	3.13e-09	0.399777	GNL1		Guanine nucleotide-binding protein-like 1	P36915	14.5567	14.5058	14.5211	14.6528	14.4673	14.6338	14.4176	14.5132	0.0464984	0.0553096	no
-0.107753	0.398029	3.13e-09	0.399918	BRD3		Bromodomain-containing protein 3	Q15059	10.7648	10.6998	10.3834	10.5964	10.4681	10.6876	10.4778	10.3799	0.111949	0.104361	no
0.115166	0.398017	3.13e-09	0.399929	RAB14		Ras-related protein Rab-14	P61106	14.7273	14.6984	15.0494	14.6111	15.1115	15.0777	14.6393	14.7182	0.139717	0.150256	no
-0.0681947	0.397915	3.13e-09	0.400023	NOL7		Nucleolar protein 7	Q9UMY1	12.0454	11.9472	12.0696	12.2045	11.916	11.9524	12.1038	12.0217	0.0741693	0.0670784	no
-0.0697997	0.397655	3.13e-09	0.400263	HGH1		Protein HGH1 homolog	Q9BTY7	14.0989	13.9964	14.0193	14.0118	13.9699	14.1592	13.7545	13.9636	0.032215	0.0796262	no
-0.0586039	0.397409	3.13e-09	0.40049	HADHB		Trifunctional enzyme subunit beta, mitochondrial	P55084	15.93	15.8336	15.866	15.9492	15.8437	16.0011	15.6758	15.8238	0.0374007	0.0675129	no
0.122344	0.397347	3.13e-09	0.400547	IDUA		Alpha-L-iduronidase	P35475	10.3777	10.4535	10.7588	10.4319	10.8139	10.7252	10.6301	10.3422	0.125296	0.12985	no
0.077726	0.397274	3.13e-09	0.400614	FAM118A		Protein FAM118A	Q9NWS6	11.9162	12.1444	12.0753	12.1445	12.3455	12.0673	12.1196	12.0589	0.0724663	0.0851722	no
0.0673106	0.397224	3.13e-09	0.40066	NPAS2		Neuronal PAS domain-containing protein 2	Q99743	14.1543	13.9693	14.0723	13.8618	14.1307	14.1844	14.0703	13.9417	0.0873722	0.0773925	no
0.0423882	0.396683	3.13e-09	0.401159	SNX3		Sorting nexin-3	O60493	15.6011	15.6119	15.6235	15.5095	15.6215	15.7321	15.5747	15.5874	0.0355476	0.0436929	no
0.115976	0.396494	3.13e-09	0.401334	MAGEB1		Melanoma-associated antigen B1	P43366	10.4824	10.5594	10.2607	10.1551	10.5832	10.6001	10.3012	10.437	0.12969	0.112127	no
-0.10782	0.396434	3.13e-09	0.401389	EHD4		EH domain-containing protein 4	Q9H223	13.1069	13.0233	12.9083	13.2891	12.7837	13.2715	12.7989	13.0422	0.112745	0.134219	no
0.0932566	0.396134	3.13e-09	0.401667	NDUFAF7		Protein arginine methyltransferase NDUFAF7, mitochondrial	Q7L592	12.5289	12.3238	12.5455	12.2225	12.5256	12.6417	12.5695	12.2569	0.108321	0.107555	no
-0.0815711	0.396059	3.13e-09	0.401736	DYNC1H1		Cytoplasmic dynein 1 heavy chain 1	Q14204	16.8857	16.7442	16.7683	16.8887	16.5259	17.0109	16.7088	16.7149	0.0527568	0.101464	no
0.0820563	0.395538	3.13e-09	0.402219	PURB		Transcriptional activator protein Pur-beta	Q96QR8	12.804	12.8566	12.9539	12.7721	13.0945	12.6788	13.0386	12.9031	0.0558648	0.0965828	no
0.0701067	0.395004	3.13e-09	0.402713	CCDC174		Coiled-coil domain-containing protein 174	Q6PII3	11.4915	11.4902	11.3209	11.4953	11.5214	11.4025	11.5761	11.5784	0.0576728	0.0586048	no
0.058805	0.394545	3.13e-09	0.403139	EIF1AD		Probable RNA-binding protein EIF1AD	Q8N9N8	14.5478	14.5374	14.6832	14.5214	14.5557	14.5033	14.7464	14.7197	0.0529668	0.06876	no
0.0549085	0.394431	3.13e-09	0.403245	ESYT1		Extended synaptotagmin-1	Q9BSJ8	13.4619	13.5668	13.5791	13.6603	13.5611	13.7522	13.5815	13.5929	0.0561176	0.0588259	no
0.128659	0.394205	3.13e-09	0.403455	SNRPB		Small nuclear ribonucleoprotein-associated proteins B and B'	P14678	17.5707	17.4404	17.8394	17.1079	17.8307	17.4422	17.6958	17.5043	0.206893	0.160841	no
0.0689086	0.394196	3.13e-09	0.403463	DSTN		Destrin	P60981	15.0207	15.1021	15.0705	15.0553	15.3343	14.9135	15.1386	15.1378	0.0234358	0.0856654	no
-0.0757441	0.394176	3.13e-09	0.403482	RAD51		DNA repair protein RAD51 homolog 1	Q06609	11.3645	11.4888	11.4594	11.6573	11.3422	11.4751	11.3653	11.4844	0.086089	0.0723847	no
0.0693071	0.394072	3.13e-09	0.403578	LYRM7		Complex III assembly factor LYRM7	Q5U5X0	14.3001	14.3044	14.5068	14.4483	14.5005	14.2587	14.5827	14.4948	0.072346	0.0821266	no
-0.0582764	0.393789	3.13e-09	0.403841	THOC5		THO complex subunit 5 homolog	Q13769	13.6169	13.5559	13.5351	13.7054	13.3987	13.6465	13.5978	13.5372	0.0536001	0.0625482	no
0.126461	0.393702	3.13e-09	0.403923	COG8		Conserved oligomeric Golgi complex subunit 8	Q96MW5	10.4197	10.3096	10.2485	10.2579	10.2196	10.5455	10.223	10.7534	0.055485	0.141517	no
-0.0409237	0.39368	3.13e-09	0.403943	PDCD6		Programmed cell death protein 6	O75340	14.5691	14.5845	14.552	14.4669	14.5506	14.4724	14.4378	14.5479	0.0358515	0.0377041	no
0.337949	0.393671	3.13e-09	0.403952	CAMKMT		Calmodulin-lysine N-methyltransferase	Q7Z624	8.00976	8.60667	8.36894	8.07065	9.36027	8.58944	8.88142	7.5767	0.196064	0.39659	no
-0.0705754	0.39335	3.13e-09	0.40425	CDK1		Cyclin-dependent kinase 1	P06493	15.8777	15.8663	15.7745	15.7698	15.6449	16.0079	15.6511	15.7022	0.0401041	0.0883957	yes
0.0747279	0.393187	3.13e-09	0.404402	MED10		Mediator of RNA polymerase II transcription subunit 10	Q9BTT4	12.877	12.9667	12.9186	12.8696	13.1641	12.7465	13.0281	12.9921	0.031186	0.0868926	no
0.17097	0.392986	3.13e-09	0.404589	RAB3GAP1		Rab3 GTPase-activating protein catalytic subunit	Q15042	14.5992	14.691	14.8335	14.1661	15.2341	14.6396	14.769	14.331	0.18573	0.229973	no
0.0357125	0.392678	3.13e-09	0.404876	PABPC1		Polyadenylate-binding protein 1	P11940	18.1966	18.1172	18.2271	18.1201	18.2456	18.192	18.1904	18.1759	0.0383755	0.0314139	no
0.209389	0.392627	3.13e-09	0.404924	CEP250		Centrosome-associated protein CEP250	Q9BV73	10.8592	11.4614	10.2657	11.242	10.9233	11.3981	11.2347	11.1099	0.332029	0.233732	no
0.0516481	0.392162	3.13e-09	0.405357	WDR4		tRNA (guanine-N(7)-)-methyltransferase non-catalytic subunit WDR4	P57081	14.8004	14.7598	14.8419	14.7782	14.9033	14.6922	14.9556	14.8357	0.0246175	0.0577163	no
-0.117893	0.391813	3.13e-09	0.405684	FIGNL1		Fidgetin-like protein 1	Q6PIW4	10.7501	10.5809	10.7328	10.6033	10.5161	10.8684	10.5354	10.2756	0.0602255	0.122574	no
-0.0454544	0.391811	3.13e-09	0.405685	UBLCP1		Ubiquitin-like domain-containing CTD phosphatase 1	Q8WVY7	15.7548	15.7203	15.5996	15.7432	15.6524	15.7556	15.5807	15.6474	0.0483916	0.048753	no
0.242233	0.391563	3.13e-09	0.405916	IMPA2		Inositol monophosphatase 2	O14732	10.0656	10.7299	10.4249	10.446	11.3522	9.95825	10.4805	10.8444	0.184835	0.330753	no
0.203327	0.391386	3.13e-09	0.406083	MRPS24		28S ribosomal protein S24, mitochondrial	Q96EL2	11.1559	10.2181	10.7875	11.1333	10.9259	11.4691	11.0022	10.7109	0.272867	0.243282	no
-0.0372389	0.391364	3.13e-09	0.406102	RPL12		60S ribosomal protein L12	P30050	18.6605	18.6385	18.6129	18.7326	18.6384	18.6806	18.5859	18.5907	0.0360588	0.0341658	no
0.0805013	0.391006	3.13e-09	0.406438	PIK3C3		Phosphatidylinositol 3-kinase catalytic subunit type 3	Q8NEB9	12.4792	12.6174	12.54	12.2654	12.7156	12.4871	12.4414	12.5799	0.101364	0.0911186	yes
0.0853313	0.390812	3.13e-09	0.406619	NMNAT1		Nicotinamide/nicotinic acid mononucleotide adenylyltransferase 1	Q9HAN9	10.4679	10.3858	10.5443	10.6374	10.6088	10.5534	10.5759	10.6387	0.0745956	0.0591088	no
-0.0693712	0.39071	3.13e-09	0.406715	POP7		Ribonuclease P protein subunit p20	O75817	13.4496	13.3619	13.4066	13.5967	13.1921	13.4588	13.4926	13.3939	0.0721628	0.0791984	no
0.0745197	0.390276	3.13e-09	0.407121	PRMT6		Protein arginine N-methyltransferase 6	Q96LA8	12.3409	12.2756	12.3416	12.3789	12.5611	12.1854	12.3871	12.5014	0.029541	0.0828445	no
0.0690754	0.390104	3.13e-09	0.407283	EXOSC9		Exosome complex component RRP45	Q06265	15.5971	15.6485	15.6772	15.6267	15.8428	15.4494	15.7845	15.7491	0.0234867	0.0838707	no
-0.0522734	0.389934	3.13e-09	0.407443	NADSYN1		Glutamine-dependent NAD(+) synthetase	Q6IA69	12.8796	12.9352	12.9349	13.0171	12.84	12.8049	12.9856	12.9274	0.0395365	0.0490565	no
-0.102773	0.389776	3.13e-09	0.40759	FAM120B		Constitutive coactivator of peroxisome proliferator-activated receptor gamma	Q96EK7	11.4376	11.1085	11.0624	11.1239	11.0915	10.8845	11.0767	11.2686	0.125425	0.11578	no
-0.0406366	0.389496	3.13e-09	0.407853	CAPG		Macrophage-capping protein	P40121	14.5339	14.5781	14.5889	14.6815	14.5476	14.5734	14.4942	14.6046	0.0434926	0.0387065	no
-0.0739863	0.388795	3.13e-09	0.408512	RPS15		40S ribosomal protein S15	P62841	15.6242	15.346	15.5605	15.2815	15.3683	15.5249	15.3313	15.2917	0.114075	0.0941487	no
-0.105994	0.388366	3.13e-09	0.408916	NFIA		Nuclear factor 1 A-type	Q12857	9.98877	10.1776	10.0113	9.91941	9.8794	9.80391	9.98064	10.0091	0.077589	0.0775549	no
0.167676	0.388295	3.13e-09	0.408983	KLF3		Krueppel-like factor 3	P57682	10.2517	9.48589	10.3314	9.87657	10.1857	10.1682	10.0067	10.2558	0.252989	0.17255	no
-0.0641449	0.388156	3.13e-09	0.409113	DDX17		Probable ATP-dependent RNA helicase DDX17	Q92841	17.9107	17.8364	17.8588	17.918	17.7933	18.0368	17.653	17.7843	0.0274987	0.078342	no
0.058161	0.387991	3.13e-09	0.409269	GPKOW		G-patch domain and KOW motifs-containing protein	Q92917	14.4738	14.3557	14.5611	14.3109	14.4925	14.5545	14.5228	14.3643	0.0792143	0.0667158	no
-0.180375	0.387923	3.13e-09	0.409333	CENPO		Centromere protein O	Q9BU64	9.53499	9.40121	9.0564	8.87895	8.84247	9.24365	9.12243	8.94151	0.206943	0.178771	no
-0.108636	0.387448	3.13e-09	0.409781	DDX31		Probable ATP-dependent RNA helicase DDX31	Q9H8H2	11.7748	11.7845	11.6894	11.9339	11.5929	11.9589	11.382	11.8143	0.0715212	0.124492	no
-0.04766	0.38717	3.13e-09	0.410043	KANK2		KN motif and ankyrin repeat domain-containing protein 2	Q63ZY3	13.2091	13.2558	13.25	13.1748	13.2529	13.0652	13.1794	13.2014	0.0261902	0.0425789	no
-0.0406028	0.386889	3.13e-09	0.410309	ETFB		Electron transfer flavoprotein subunit beta	P38117	16.9171	16.9192	16.9216	16.9801	16.9175	16.7758	16.9642	16.9181	0.02134	0.041112	no
-0.0447024	0.386437	3.13e-09	0.410736	ACBD3		Golgi resident protein GCP60	Q9H3P7	13.151	13.1363	13.0597	13.2264	13.0926	13.0728	13.0984	13.1307	0.0473545	0.0373544	no
0.2402	0.385827	3.13e-09	0.411313	ASAP2		Arf-GAP with SH3 domain, ANK repeat and PH domain-containing protein 2	O43150	9.09144	9.53375	10.2349	9.07944	10.1515	9.55982	9.57751	9.61148	0.411747	0.301448	no
-0.272141	0.385795	3.13e-09	0.411344	TRIM41		E3 ubiquitin-protein ligase TRIM41	Q8WV44	8.27915	9.3227	8.76126	8.72528	8.19346	8.86542	8.02675	8.91418	0.303885	0.300165	no
-0.0829079	0.385427	3.13e-09	0.411692	CASC3		Protein CASC3	O15234	11.5696	11.6492	11.6112	11.962	11.6003	11.562	11.6328	11.6654	0.130803	0.0965241	no
-0.0572765	0.385068	3.13e-09	0.412033	FANCI		Fanconi anemia group I protein	Q9NVI1	13.7135	13.621	13.59	13.7145	13.6218	13.7571	13.5376	13.4933	0.0441801	0.0636087	no
0.0376944	0.385046	3.13e-09	0.412054	RAB5C		Ras-related protein Rab-5C	P51148	14.5827	14.6441	14.5556	14.6055	14.5847	14.5898	14.6911	14.6731	0.0260264	0.0336043	no
-0.0390529	0.384659	3.13e-09	0.412421	EIF3K		Eukaryotic translation initiation factor 3 subunit K	Q9UBQ5	16.2706	16.1776	16.1848	16.3229	16.1565	16.2537	16.1824	16.207	0.0488459	0.0401917	no
0.0593696	0.384625	3.13e-09	0.412454	NCOR1		Nuclear receptor corepressor 1	O75376	12.6523	12.4947	12.7074	12.7239	12.7606	12.6332	12.7655	12.6566	0.0703927	0.0592623	no
-0.213181	0.384293	3.13e-09	0.412769	HAUS7		HAUS augmin-like complex subunit 7	Q99871	10.5159	10.2467	10.0853	10.6943	10.3478	10.3645	9.44403	10.5334	0.188003	0.229304	no
0.0540366	0.384149	3.13e-09	0.412905	RMDN1		Regulator of microtubule dynamics protein 1	Q96DB5	13.6013	13.5738	13.7145	13.622	13.8217	13.6923	13.573	13.6409	0.0428863	0.0601736	no
0.64891	0.383811	3.13e-09	0.413227	ATRIP		ATR-interacting protein	Q8WXE1	7.91228	4.78102	6.32648	6.67605	8.17697	6.85712	6.78417	6.47321	0.807497	0.664073	no
-0.0389891	0.383762	3.13e-09	0.413274	NUP88		Nuclear pore complex protein Nup88	Q99567	13.8442	13.7778	13.7633	13.8156	13.7012	13.8183	13.7533	13.7721	0.0254812	0.0309848	no
-0.0330339	0.383559	3.13e-09	0.413467	NAE1		NEDD8-activating enzyme E1 regulatory subunit	Q13564	14.9106	14.8352	14.8789	14.8993	14.8088	14.8719	14.8339	14.8774	0.0228637	0.0243045	no
-0.0354652	0.383553	3.13e-09	0.413473	PPP1CB		Serine/threonine-protein phosphatase PP1-beta catalytic subunit	P62140	14.8493	14.8149	14.7878	14.8894	14.8035	14.7895	14.8506	14.7561	0.0305559	0.0299038	no
-0.170119	0.383538	3.13e-09	0.413487	RPP25L		Ribonuclease P protein subunit p25-like protein	Q8N5L8	13.2026	13.4557	13.0307	12.959	13.1571	12.9696	13.4176	12.4231	0.158031	0.207477	no
-0.0593314	0.383504	3.13e-09	0.413519	RBP5		Retinol-binding protein 5	P82980	12.7836	12.7104	12.7342	12.874	12.5903	12.6701	12.8006	12.8039	0.0508021	0.0610793	no
0.0369087	0.383399	3.13e-09	0.413619	KIF2C		Kinesin-like protein KIF2C	Q99661	15.3753	15.3593	15.4023	15.3023	15.4755	15.3786	15.3442	15.3886	0.0290506	0.0349132	no
0.0763507	0.383356	3.13e-09	0.41366	MAD2L1		Mitotic spindle assembly checkpoint protein MAD2A	Q13257	15.1749	15.2924	15.3342	15.2116	15.4379	15.0447	15.4246	15.4113	0.0505654	0.0942397	no
0.0704465	0.383207	3.13e-09	0.413803	CBR1		Carbonyl reductase [NADPH] 1	P16152	16.501	16.4013	16.5876	16.2897	16.6486	16.3451	16.5975	16.47	0.0885012	0.088158	no
0.0521146	0.383147	3.13e-09	0.413859	IFT74		Intraflagellar transport protein 74 homolog	Q96LB3	13.4628	13.5172	13.5519	13.5506	13.6276	13.4144	13.626	13.6229	0.0286825	0.0543743	no
0.0888377	0.383044	3.13e-09	0.413958	DDX51		ATP-dependent RNA helicase DDX51	Q8N8A6	10.7775	10.8323	10.5492	10.6551	10.7624	10.8557	10.6675	10.8839	0.0870055	0.0784003	no
0.0627368	0.3826	3.13e-09	0.414381	RPL37A		60S ribosomal protein L37a	P61513	15.6149	15.5018	15.6003	15.399	15.7383	15.6532	15.5178	15.4577	0.0684355	0.0774617	no
0.0458537	0.382226	3.13e-09	0.414738	ILKAP		Integrin-linked kinase-associated serine/threonine phosphatase 2C	Q9H0C8	14.4287	14.3991	14.4724	14.3316	14.5189	14.5275	14.387	14.3818	0.0407497	0.0485263	no
0.103902	0.382205	3.13e-09	0.414758	ABHD11		Protein ABHD11	Q8NFV4	11.4257	11.3943	10.924	11.1904	11.3907	11.3969	11.2046	11.3578	0.153453	0.11097	no
0.0706522	0.38218	3.13e-09	0.414782	POLE4		DNA polymerase epsilon subunit 4	Q9NR33	13.4535	13.4491	13.4907	13.5054	13.671	13.2873	13.6391	13.5839	0.0192131	0.0835843	no
-0.0353432	0.381994	3.13e-09	0.41496	HADH		Hydroxyacyl-coenzyme A dehydrogenase, mitochondrial	Q16836	16.2002	16.1507	16.1426	16.2437	16.1227	16.2179	16.1417	16.1134	0.0328226	0.0333117	no
-0.0493194	0.381948	3.13e-09	0.415004	LYPLA2		Acyl-protein thioesterase 2	O95372	15.1044	15.1001	15.1805	15.1145	14.9696	15.0113	15.2181	15.1033	0.026341	0.0555877	no
-0.146668	0.381871	3.13e-09	0.415078	KIF3A		Kinesin-like protein KIF3A	Q9Y496	10.2536	10.3601	10.1451	10.0886	9.90469	10.5283	9.8123	10.0154	0.0840404	0.167337	no
-0.0623685	0.381578	3.13e-09	0.415358	PPFIA3		Liprin-alpha-3	O75145	12.9787	12.9118	13.0342	13.166	12.8833	12.9479	12.9128	13.0973	0.0758477	0.0706502	no
0.0555289	0.381381	3.13e-09	0.415546	DCTN5		Dynactin subunit 5	Q9BTE1	13.1787	13.2221	13.2234	13.3329	13.3144	13.1428	13.3713	13.3507	0.04632	0.0592299	no
-0.122007	0.380837	3.13e-09	0.416066	POLRMT		DNA-directed RNA polymerase, mitochondrial	O00411	11.5908	11.5487	11.5029	11.6935	11.5697	11.7991	11.0733	11.4058	0.0571247	0.140719	no
-0.114908	0.380801	3.13e-09	0.416101	POTEI		POTE ankyrin domain family member I	P0CG38	13.5695	13.3564	13.4966	13.0288	13.3576	13.1007	13.4806	13.0529	0.157066	0.146302	no
0.0446998	0.380749	3.13e-09	0.416151	NFS1		Cysteine desulfurase, mitochondrial	Q9Y697	13.7775	13.7779	13.874	13.8337	13.751	13.8925	13.9245	13.874	0.0326846	0.0436278	no
0.0317306	0.380526	3.13e-09	0.416365	RCC2		Protein RCC2	Q9P258	17.6006	17.5511	17.5873	17.5617	17.6718	17.5821	17.6012	17.5724	0.0157589	0.0260854	no
0.063184	0.380432	3.13e-09	0.416455	SLC4A1AP		Kanadaptin	Q9BWU0	14.2356	14.1795	14.2503	14.0963	14.3907	14.0637	14.3318	14.2282	0.0477453	0.0760533	no
-0.302822	0.380399	3.13e-09	0.416486	H2AX;H2AC21;H2AC1		Histone H2AX;Histone H2A type 2-B;Histone H2A type 1-A	P16104;Q8IUE6;Q96QV6	10.6249	9.57914	10.3623	8.94767	9.74694	9.83583	9.13909	9.58089	0.478567	0.406177	no
0.0581779	0.380331	3.13e-09	0.416552	NFE2		Transcription factor NF-E2 45 kDa subunit	Q16621	13.4081	13.4362	13.4486	13.5914	13.5405	13.3956	13.6614	13.5195	0.0582293	0.0664569	no
0.0589749	0.380317	3.13e-09	0.416565	HIC2		Hypermethylated in cancer 2 protein	Q96JB3	12.9029	12.8276	12.9117	12.7809	13.0415	12.8442	12.9771	12.7961	0.043168	0.0638818	no
0.372561	0.380313	3.13e-09	0.416569	UTP15		U3 small nucleolar RNA-associated protein 15 homolog	Q8TED0	11.4135	11.2401	10.6844	11.4498	11.4487	10.9722	13.0198	10.8374	0.220028	0.705892	no
-0.0647399	0.380221	3.13e-09	0.416658	EIF4A2		Eukaryotic initiation factor 4A-II	Q14240	14.6343	14.7083	14.678	14.8935	14.6157	14.5179	14.7283	14.7932	0.0815306	0.0801631	no
0.0626707	0.380068	3.13e-09	0.416804	PTPN11		Tyrosine-protein phosphatase non-receptor type 11	Q06124	15.4026	15.4114	15.4542	15.4453	15.6214	15.2567	15.554	15.532	0.0174742	0.0764751	no
0.12178	0.37984	3.13e-09	0.417023	DTD1		D-aminoacyl-tRNA deacylase 1	Q8TEA8	13.2247	13.1326	13.4004	12.7445	13.4	13.09	13.423	13.0764	0.182201	0.151023	no
[truncated: 3,377 more rows]
